# Supplementary material
Source: PubMed Central journal article supplement (PMC3436295)
Supplement: supp_M112.354415_jbc.M112.354415-1.pdf [file supp_M112.354415_jbc.M112.354415-1.pdf]

SUPPLEMENTARY DATA

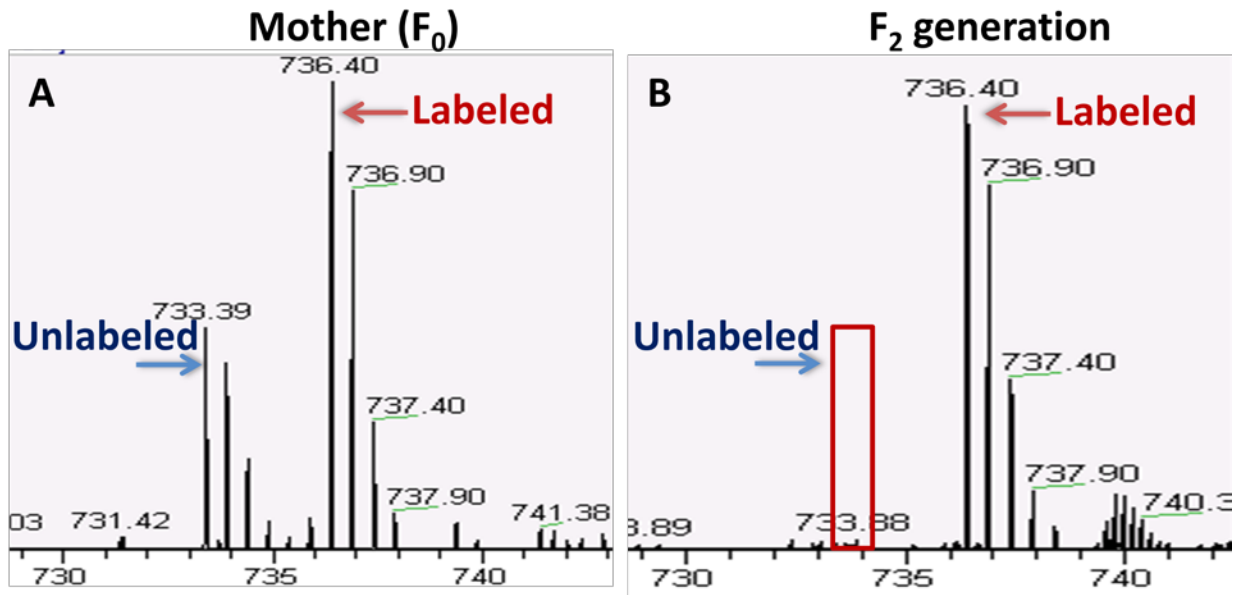

**Supplementary Figure 1:** Mass spectrum showing incorporation efficiency for  $^{13}\text{C}_6$ -Lysine in skeletal muscle proteins in mice maintained on  $^{13}\text{C}_6$ -Lysine diet until F2 generation. The average labeling efficacy of all uniquely identified proteins from the gastrocnemius was  $98.26 \pm 3.5\%$ . The images show representative spectra for identified peptides in a narrow part of the mass spectra. This spectra shows the unlabeled (733.39 Da) and labeled (736.40 Da) peptide **LASADIETYLLEK** from myosin 4 protein from the gastrocnemius muscle of the mother (A) and a pup from the F2 (B) generation. Red box marks the region where (if present) we would have detected the peak for the unlabeled peptide spectra.

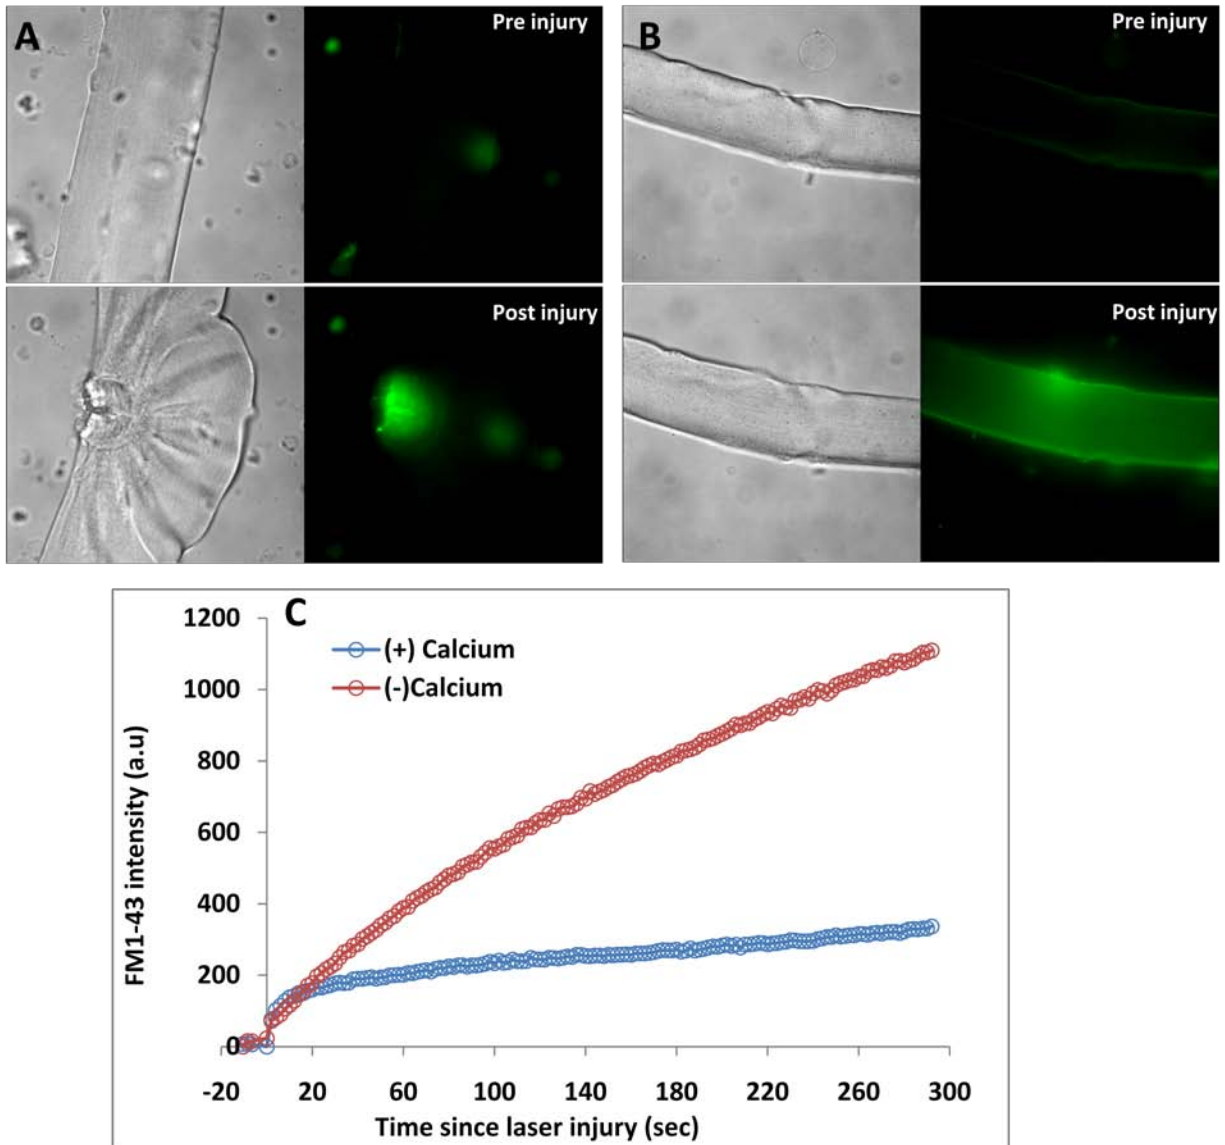

**Supplementary Figure 2:** Imaging healing of sarcolemma following laser injury. Sarcolemma of myofibers isolated from EDL muscle were injured using a high intensity pulsed laser in the presence of 2 $\mu$ M FM1-43 dye. The myofibers were maintained (A) in the presence of calcium (+ Calcium) or (B) in PBS with 1mM EGTA (- Calcium). Panels show the transmitted light (left panel) and the corresponding fluorescence (right panel) image of the fiber before injury and at the end of healing. (C) Plot of the FM1-43 intensity in the myofibers shows above during the course of healing.

**Supplementary Video 1:** Video showing MitoTracker labeled myofiber as it undergoes multiple rounds of injury. The mild injuries (shown in figure 4C) are followed by a larger injury (not shown in Figure 4c). Note while the milder injury causes minor accumulation of mitochondria, larger injury leads to greater accumulation of mitochondria at the site of injury.

**Table S1:** List of cell surface proteins identified from C2C12 cells in two independent biological replicate experiments. These proteins were isolated by cell surface biotinylation, followed by membrane solubilization using detergents. Subcellular classification of proteins is based on gene ontology annotation with reference to Uniprot database (<http://www.uniprot.org>) as well as literature search.

**Table S2:** List of plasma membrane proteins identified from C2C12 cells in two independent biological replicate experiments. These proteins were isolated by cell surface biotinylation, followed by mechanical lysis. Proteins were classified according to the GO annotation from the Uniprot database (<http://www.uniprot.org>) as well as literature search.

**Table S3:** Protein identification results for plasma membrane preparation from the H2K cells. The listed proteins were identified in two independent biological replicate experiments using the mechanical lysis method. Proteins were classified according to the GO annotation from the Uniprot database (<http://www.uniprot.org>) as well as literature search.

**Table S4:** Summary of cell surface proteins identified from two combined replicate experiments where EDL and Soleus muscle fibers were used together. Here, proteins were isolated using the cell surface biotinylation and mechanical lysis protocol. The subcellular localization of proteins was predicted on the basis of Gene Ontology (GO) information available from the Uniprot database (<http://www.uniprot.org>) as well as literature search.

**Supplementary Figure 1:** Mass spectrum showing incorporation efficiency for  $^{13}\text{C}_6$ -Lysine in skeletal muscle proteins in mice maintained on  $^{13}\text{C}_6$ -Lysine diet until F2 generation. The average labeling efficacy of all uniquely identified proteins from the gastrocnemius was  $98.26 \pm 3.5\%$ . The images show representative spectra for identified peptides in a narrow part of the mass spectra. This spectra shows the unlabeled (733.39 Da) and labeled (736.40 Da) peptide **LASADIETYLLEK** from myosin 4 protein from the gastrocnemius muscle of the mother (A) and a pup from the F2 (B) generation. Red box marks the region where (if present) we would have detected the peak for the unlabeled peptide spectrum.

Table S1

| Accession | Reference                                                                                                | P (pro) | Score  | Coverage | Peptide (Hits)       | Subcellular locations                                                                                                                                                                   |
|-----------|----------------------------------------------------------------------------------------------------------|---------|--------|----------|----------------------|-----------------------------------------------------------------------------------------------------------------------------------------------------------------------------------------|
| Q9QXS1    | PLEC1_MOUSE Plectin-1<br>OS=Mus musculus<br>GN=Plec1 PE=1 SV=2                                           | 1.0E-30 | 1668.3 | 33.10    | 323 (322 1 0<br>0 0) | Cytoplasm &° cytoskeleton. Cell junction &° hemidesmosome.                                                                                                                              |
| Q8VDD5    | MYH9_MOUSE Myosin-9<br>OS=Mus musculus<br>GN=Myh9 PE=1 SV=4                                              | 1.0E-30 | 1502.4 | 43.60    | 480 (471 8 1<br>0 0) | ND                                                                                                                                                                                      |
| Q61879    | MYH10_MOUSE Myosin-10<br>OS=Mus musculus<br>GN=Myh10 PE=1 SV=2                                           | 1.6E-14 | 606.3  | 30.40    | 96 (94 2 0 0<br>0)   | ND                                                                                                                                                                                      |
| P20152    | VIME_MOUSE Vimentin<br>OS=Mus musculus<br>GN=Vim PE=1 SV=3                                               | 1.0E-30 | 546.3  | 57.10    | 368 (364 2 2<br>0 0) | ND                                                                                                                                                                                      |
| P11276    | FINC_MOUSE Fibronectin<br>OS=Mus musculus<br>GN=Fn1 PE=1 SV=3                                            | 3.3E-15 | 580.4  | 27.40    | 312 (312 0 0<br>0 0) | Secreted &° extracellular space &° extracellular matrix.                                                                                                                                |
| Q8BTM8    | FLNA_MOUSE Filamin-A<br>OS=Mus musculus<br>GN=Flna PE=1 SV=4                                             | 4.4E-12 | 520.3  | 26.00    | 107 (107 0 0<br>0 0) | Cytoplasm &° cell cortex. Cytoplasm &° cytoskeleton.                                                                                                                                    |
| P62737    | ACTA_MOUSE Actin, aortic smooth muscle<br>OS=Mus musculus<br>GN=Acta2 PE=1 SV=1                          | 7.8E-15 | 404.3  | 52.00    | 320 (317 3 0<br>0 0) | Cytoplasm &° cytoskeleton.                                                                                                                                                              |
| Q91ZX7    | LRP1_MOUSE Prolow-density lipoprotein receptor-related protein 1<br>OS=Mus musculus<br>GN=Lrp1 PE=1 SV=1 | 3.4E-10 | 300.2  | 6.70     | 39 (39 0 0 0<br>0)   | Cell membrane; Single-pass type I membrane protein. Membrane &° coated pit. Cell membrane; Peripheral membrane protein; Extracellular side. Membrane &° coated pit. Cytoplasm. Nucleus. |
| P20029    | GRP78_MOUSE 78 kDa glucose-regulated protein<br>OS=Mus musculus<br>GN=Hspa5 PE=1 SV=3                    | 1.1E-15 | 340.3  | 46.70    | 60 (60 0 0 0<br>0)   | Endoplasmic reticulum lumen. Melanosome.                                                                                                                                                |
| Q80X90    | FLNB_MOUSE Filamin-B<br>OS=Mus musculus<br>GN=Flnb PE=1 SV=2                                             | 8.3E-14 | 340.3  | 15.40    | 39 (39 0 0 0<br>0)   | Cytoplasm &° cell cortex. Cytoplasm &° myofibril &° sarcomere &° Z line. Cytoplasm &° cytoskeleton.                                                                                     |
| Q62351    | TFR1_MOUSE Transferrin receptor protein 1<br>OS=Mus musculus GN=Tfrc PE=1 SV=1                           | 7.8E-15 | 290.3  | 29.40    | 45 (45 0 0 0<br>0)   | Cell membrane; Single-pass type II membrane protein. Melanosome.                                                                                                                        |

|        |                                                                                                                    |         |       |       |                   |                                                                                                                                                                                    |
|--------|--------------------------------------------------------------------------------------------------------------------|---------|-------|-------|-------------------|------------------------------------------------------------------------------------------------------------------------------------------------------------------------------------|
| Q7TMM9 | TBB2A_MOUSE Tubulin beta-2A chain OS=Mus musculus GN=Tubb2a PE=1 SV=1                                              | 1.3E-14 | 320.4 | 46.50 | 166 (161 4 1 0 0) | Cytoplasm &° cytoskeleton.                                                                                                                                                         |
| P31001 | DESM_MOUSE Desmin OS=Mus musculus GN=Des PE=1 SV=3                                                                 | 2.8E-12 | 306.3 | 54.60 | 113 (98 15 0 0 0) | Cytoplasm.                                                                                                                                                                         |
| Q6P5H2 | NEST_MOUSE Nestin OS=Mus musculus GN=Nes PE=1 SV=1                                                                 | 4.0E-12 | 270.3 | 18.40 | 47 (47 0 0 0 0)   | ND                                                                                                                                                                                 |
| P38647 | GRP75_MOUSE Stress-70 protein, mitochondrial OS=Mus musculus GN=Hspa9 PE=1 SV=2                                    | 3.5E-11 | 260.3 | 33.70 | 39 (39 0 0 0 0)   | Mitochondrion.                                                                                                                                                                     |
| Q8VHY0 | CSPG4_MOUSE Chondroitin sulfate proteoglycan 4 OS=Mus musculus GN=Cspg4 PE=1 SV=2                                  | 7.7E-10 | 240.2 | 12.50 | 25 (25 0 0 0 0)   | Apical cell membrane; Single-pass type I membrane protein; Extracellular side. Cell projection &° lamellipodium membrane; Single-pass type I membrane protein; Extracellular side. |
| P48678 | LMNA_MOUSE Lamin-A/C OS=Mus musculus GN=Lmna PE=1 SV=2                                                             | 2.3E-13 | 260.3 | 36.20 | 63 (63 0 0 0 0)   | Nucleus. Nucleus envelope.                                                                                                                                                         |
| Q05793 | PGBM_MOUSE Basement membrane-specific heparan sulfate proteoglycan core protein OS=Mus musculus GN=Hspg2 PE=1 SV=1 | 9.7E-11 | 240.2 | 7.60  | 41 (41 0 0 0 0)   | Secreted &° extracellular space &° extracellular matrix &° basement membrane.                                                                                                      |
| P26039 | TLN1_MOUSE Talin-1 OS=Mus musculus GN=Tln1 PE=1 SV=1                                                               | 1.5E-12 | 240.3 | 13.10 | 28 (28 0 0 0 0)   | Cell projection &° ruffle membrane; Peripheral membrane protein; Cytoplasmic side. Cytoplasm &° cytoskeleton.                                                                      |
| P08113 | ENPL_MOUSE Endoplasmin OS=Mus musculus GN=Hsp90b1 PE=1 SV=2                                                        | 5.5E-12 | 240.3 | 27.10 | 35 (35 0 0 0 0)   | Endoplasmic reticulum lumen. Melanosome.                                                                                                                                           |
| P13595 | NCAM1_MOUSE Neural cell adhesion molecule 1 OS=Mus musculus GN=Ncam1 PE=1 SV=3                                     | 1.0E-30 | 230.3 | 21.20 | 68 (68 0 0 0 0)   | Cell membrane; Single-pass type I membrane protein. Cell membrane; Lipid-anchor &° GPI-anchor.                                                                                     |
| Q61738 | ITA7_MOUSE Integrin alpha-7 OS=Mus musculus GN=Itga7 PE=1 SV=2                                                     | 3.1E-12 | 200.3 | 19.40 | 58 (58 0 0 0 0)   | Membrane; Single-pass type I membrane protein.                                                                                                                                     |
| P43406 | ITAV_MOUSE Integrin                                                                                                | 5.6E-15 | 230.2 | 17.90 | 39 (39 0 0 0 0)   | Membrane; Single-                                                                                                                                                                  |

*A novel role of mitochondria in muscle injury*

|        |                                                                                                                      |         |       |       |                      |    |                                                                                                                                                                                                                                                                                          |
|--------|----------------------------------------------------------------------------------------------------------------------|---------|-------|-------|----------------------|----|------------------------------------------------------------------------------------------------------------------------------------------------------------------------------------------------------------------------------------------------------------------------------------------|
|        | alpha-V OS=Mus musculus<br>GN=Itgav PE=1 SV=1                                                                        |         |       |       |                      | 0) | pass type I<br>membrane protein.                                                                                                                                                                                                                                                         |
| Q03145 | EPHA2_MOUSE Ephrin<br>type-A receptor 2 OS=Mus<br>musculus GN=Epha2 PE=1<br>SV=2                                     | 1.2E-12 | 220.3 | 16.70 | 36 (36 0 0 0<br>0)   | 0) | Cell membrane;<br>Single-pass type I<br>membrane protein.<br>Cell projection â€°<br>ruffle membrane;<br>Single-pass type I<br>membrane protein.<br>Cell projection â€°<br>lamellipodium<br>membrane; Single-<br>pass type I<br>membrane protein.<br>Cell junction â€°<br>focal adhesion. |
| Q9JHU4 | DYHC1_MOUSE<br>Cytoplasmic dynein 1<br>heavy chain 1 OS=Mus<br>musculus GN=Dync1h1<br>PE=1 SV=1                      | 1.7E-10 | 200.2 | 4.20  | 28 (28 0 0 0<br>0)   | 0) | Cytoplasm â€°<br>cytoskeleton.                                                                                                                                                                                                                                                           |
| P63017 | HSP7C_MOUSE Heat<br>shock cognate 71 kDa<br>protein OS=Mus musculus<br>GN=Hspa8 PE=1 SV=1                            | 5.7E-14 | 220.2 | 23.50 | 37 (37 0 0 0<br>0)   | 0) | Cytoplasm.<br>Melanosome.                                                                                                                                                                                                                                                                |
| P09055 | ITB1_MOUSE Integrin<br>beta-1 OS=Mus musculus<br>GN=Itgb1 PE=1 SV=1                                                  | 1.9E-11 | 208.3 | 16.20 | 102 (89 13 0<br>0 0) | 0) | Cell membrane;<br>Single-pass type I<br>membrane protein.<br>Melanosome.                                                                                                                                                                                                                 |
| Q02257 | PLAK_MOUSE Junction<br>plakoglobin OS=Mus<br>musculus GN=Jup PE=1<br>SV=3                                            | 9.4E-14 | 190.3 | 23.40 | 46 (46 0 0 0<br>0)   | 0) | Cell junction â€°<br>adherens junction.<br>Cell junction â€°<br>desmosome.<br>Cytoplasm â€°<br>cytoskeleton.<br>Membrane;<br>Peripheral<br>membrane protein.                                                                                                                             |
| P07356 | ANXA2_MOUSE Annexin<br>A2 OS=Mus musculus<br>GN=Anxa2 PE=1 SV=2                                                      | 1.8E-12 | 200.3 | 46.00 | 46 (46 0 0 0<br>0)   | 0) | Secreted â€°<br>extracellular space<br>â€° extracellular<br>matrix â€°<br>basement<br>membrane.<br>Melanosome.                                                                                                                                                                           |
| Q8VDN2 | AT1A1_MOUSE<br>Sodium/potassium-<br>transporting ATPase<br>subunit alpha-1 OS=Mus<br>musculus GN=Atp1a1<br>PE=1 SV=1 | 1.9E-12 | 200.3 | 21.60 | 37 (37 0 0 0<br>0)   | 0) | Cell membrane;<br>Multi-pass<br>membrane protein.                                                                                                                                                                                                                                        |
| Q80YX1 | TENA_MOUSE Tenascin<br>OS=Mus musculus<br>GN=Tnc PE=1 SV=1                                                           | 9.1E-12 | 200.2 | 9.60  | 22 (22 0 0 0<br>0)   | 0) | Secreted â€°<br>extracellular space<br>â€° extracellular<br>matrix.                                                                                                                                                                                                                      |

*A novel role of mitochondria in muscle injury*

|        |                                                                                                    |         |       |       |                  |                                                                                                                   |
|--------|----------------------------------------------------------------------------------------------------|---------|-------|-------|------------------|-------------------------------------------------------------------------------------------------------------------|
| Q9D0E1 | HNRPM_MOUSE<br>Heterogeneous nuclear ribonucleoprotein M<br>OS=Mus musculus<br>GN=Hnrnpm PE=1 SV=3 | 8.8E-11 | 198.2 | 22.20 | 33 (32 1 0 0 0)  | Nucleus.                                                                                                          |
| P07901 | HS90A_MOUSE Heat shock protein HSP 90-alpha<br>OS=Mus musculus<br>GN=Hsp90aa1 PE=1 SV=4            | 3.0E-12 | 194.3 | 27.10 | 54 (38 16 0 0 0) | Cytoplasm.<br>Melanosome.                                                                                         |
| Q8CAQ8 | IMMT_MOUSE<br>Mitochondrial inner membrane protein OS=Mus musculus<br>GN=Immt PE=1 SV=1            | 3.6E-13 | 180.3 | 22.70 | 31 (31 0 0 0 0)  | Mitochondrion inner membrane.                                                                                     |
| P14824 | ANXA6_MOUSE Annexin A6<br>OS=Mus musculus<br>GN=Anxa6 PE=1 SV=2                                    | 5.4E-13 | 180.2 | 28.20 | 21 (21 0 0 0 0)  | Cytoplasm.<br>Melanosome.                                                                                         |
| P63038 | CH60_MOUSE 60 kDa heat shock protein, mitochondrial<br>OS=Mus musculus<br>GN=Hspd1 PE=1 SV=1       | 4.4E-15 | 190.3 | 30.70 | 24 (24 0 0 0 0)  | Mitochondrion matrix.                                                                                             |
| P56480 | ATPB_MOUSE ATP synthase subunit beta, mitochondrial<br>OS=Mus musculus<br>GN=Atp5b PE=1 SV=2       | 1.8E-13 | 190.3 | 39.30 | 26 (26 0 0 0 0)  | Mitochondrion.<br>Mitochondrion inner membrane.                                                                   |
| O35516 | NOTC2_MOUSE<br>Neurogenic locus notch homolog protein 2<br>OS=Mus musculus<br>GN=Notch2 PE=1 SV=1  | 2.5E-11 | 190.3 | 8.30  | 37 (37 0 0 0 0)  | Cell membrane;<br>Single-pass type I membrane protein.<br>Nucleus.                                                |
| P52480 | KPYM_MOUSE Pyruvate kinase isozymes M1/M2<br>OS=Mus musculus<br>GN=Pkm2 PE=1 SV=4                  | 2.2E-15 | 170.3 | 33.50 | 20 (20 0 0 0 0)  | Cytoplasm.<br>Nucleus.                                                                                            |
| P33146 | CAD15_MOUSE<br>Cadherin-15<br>OS=Mus musculus<br>GN=Cdh15 PE=1 SV=2                                | 6.3E-14 | 170.3 | 25.30 | 57 (57 0 0 0 0)  | Cell membrane;<br>Single-pass type I membrane protein.                                                            |
| P27773 | PDIA3_MOUSE Protein disulfide-isomerase A3<br>OS=Mus musculus<br>GN=Pdia3 PE=1 SV=2                | 2.7E-11 | 190.2 | 37.80 | 21 (21 0 0 0 0)  | Endoplasmic reticulum lumen.<br>Melanosome.                                                                       |
| P33146 | CAD15_MOUSE<br>Cadherin-15<br>OS=Mus musculus<br>GN=Cdh15 PE=1 SV=2                                | 4.5E-13 | 180.3 | 26.50 | 63 (63 0 0 0 0)  | Cell membrane;<br>Single-pass type I membrane protein.                                                            |
| Q02248 | CTNB1_MOUSE Catenin beta-1<br>OS=Mus musculus<br>GN=Ctnnb1 PE=1 SV=1                               | 5.9E-09 | 170.2 | 19.80 | 30 (30 0 0 0 0)  | Cytoplasm.<br>Cytoplasmic cytoskeleton.<br>Nucleus.<br>Cell junction<br>adherens junction.<br>Cell junction. Cell |

*A novel role of mitochondria in muscle injury*

|        |                                                                                           |         |       |       |                 |                                                                                                                                                                                                                                            |
|--------|-------------------------------------------------------------------------------------------|---------|-------|-------|-----------------|--------------------------------------------------------------------------------------------------------------------------------------------------------------------------------------------------------------------------------------------|
|        |                                                                                           |         |       |       |                 | membrane.                                                                                                                                                                                                                                  |
| Q05920 | PYC_MOUSE Pyruvate carboxylase, mitochondrial OS=Mus musculus GN=Pc PE=1 SV=1             | 2.6E-10 | 180.3 | 17.70 | 23 (23 0 0 0 0) | Mitochondrion matrix.                                                                                                                                                                                                                      |
| Q9JKF1 | IQGA1_MOUSE Ras GTPase-activating-like protein IQGAP1 OS=Mus musculus GN=Iqgap1 PE=1 SV=1 | 3.4E-14 | 160.3 | 10.70 | 17 (17 0 0 0 0) | Cell membrane.                                                                                                                                                                                                                             |
| Q64727 | VINC_MOUSE Vinculin OS=Mus musculus GN=Vcl PE=1 SV=4                                      | 1.0E-09 | 180.2 | 19.80 | 18 (18 0 0 0 0) | Cytoplasm $\hat{\epsilon}^{\circ}$ cytoskeleton. Cell junction $\hat{\epsilon}^{\circ}$ adherens junction. Cell membrane; Peripheral membrane protein; Cytoplasmic side. Cell junction.                                                    |
| Q8VHX6 | FLNC_MOUSE Filamin-C OS=Mus musculus GN=Flnc PE=1 SV=3                                    | 1.6E-13 | 160.3 | 7.60  | 24 (24 0 0 0 0) | Cytoplasm. Membrane; Peripheral membrane protein. Cytoplasm $\hat{\epsilon}^{\circ}$ cytoskeleton. Cytoplasm $\hat{\epsilon}^{\circ}$ myofibril $\hat{\epsilon}^{\circ}$ sarcomere $\hat{\epsilon}^{\circ}$ Z line.                        |
| P09103 | PDIA1_MOUSE Protein disulfide-isomerase OS=Mus musculus GN=P4hb PE=1 SV=1                 | 4.5E-12 | 160.3 | 31.40 | 19 (19 0 0 0 0) | Endoplasmic reticulum lumen. Melanosome. Cell membrane; Peripheral membrane protein.                                                                                                                                                       |
| P35441 | TSP1_MOUSE Thrombospondin-1 OS=Mus musculus GN=Thbs1 PE=1 SV=1                            | 1.9E-11 | 170.3 | 16.00 | 39 (39 0 0 0 0) | ND                                                                                                                                                                                                                                         |
| Q9WTI7 | MYO1C_MOUSE Myosin-Ic OS=Mus musculus GN=Myo1c PE=1 SV=2                                  | 2.9E-11 | 160.2 | 17.00 | 21 (21 0 0 0 0) | Cytoplasm. Cell membrane. Cell projection $\hat{\epsilon}^{\circ}$ stereocilium membrane. Nucleus $\hat{\epsilon}^{\circ}$ nucleolus. Nucleus $\hat{\epsilon}^{\circ}$ nucleoplasm. Nucleus $\hat{\epsilon}^{\circ}$ nuclear pore complex. |
| P11499 | HS90B_MOUSE Heat shock protein HSP 90-beta OS=Mus musculus                                | 7.0E-12 | 158.3 | 16.40 | 28 (27 1 0 0 0) | Cytoplasm. Melanosome.                                                                                                                                                                                                                     |



*A novel role of mitochondria in muscle injury*

|        |                                                                                             |         |       |       |                   |                                                                                                                                                                                                    |
|--------|---------------------------------------------------------------------------------------------|---------|-------|-------|-------------------|----------------------------------------------------------------------------------------------------------------------------------------------------------------------------------------------------|
|        | GN=Hsp90ab1 PE=1 SV=2                                                                       |         |       |       |                   |                                                                                                                                                                                                    |
| Q9EPR5 | SORC2_MOUSE VPS10 domain-containing receptor SorCS2 OS=Mus musculus GN=Sorcs2 PE=1 SV=1     | 3.7E-10 | 170.2 | 13.90 | 31 (31 0 0 0 0)   | Membrane; Single-pass type I membrane protein.                                                                                                                                                     |
| Q8CIE6 | COPA_MOUSE Coatamer subunit alpha OS=Mus musculus GN=Copa PE=1 SV=1                         | 7.7E-12 | 170.2 | 16.00 | 17 (17 0 0 0 0)   | Cytoplasm. Golgi apparatus membrane; Peripheral membrane protein; Cytoplasmic side. Cytoplasmic vesicle â€° COPI-coated vesicle membrane; Peripheral membrane protein; Cytoplasmic side. Secreted. |
| P60843 | IF4A1_MOUSE Eukaryotic initiation factor 4A-I OS=Mus musculus GN=Eif4a1 PE=2 SV=1           | 2.5E-11 | 168.3 | 31.80 | 35 (34 1 0 0 0)   | ND                                                                                                                                                                                                 |
| P58252 | EF2_MOUSE Elongation factor 2 OS=Mus musculus GN=Eef2 PE=1 SV=2                             | 9.7E-11 | 160.3 | 14.80 | 20 (20 0 0 0 0)   | Cytoplasm.                                                                                                                                                                                         |
| Q7TPR4 | ACTN1_MOUSE Alpha-actinin-1 OS=Mus musculus GN=Actn1 PE=2 SV=1                              | 1.6E-10 | 160.3 | 19.70 | 20 (20 0 0 0 0)   | Cytoplasm â€° cytoskeleton. Cytoplasm â€° myofibril â€° sarcomere â€° Z line. Cell membrane. Cell projection â€° ruffle.                                                                           |
| Q03265 | ATPA_MOUSE ATP synthase subunit alpha, mitochondrial OS=Mus musculus GN=Atp5a1 PE=1 SV=1    | 1.9E-12 | 160.3 | 28.00 | 31 (31 0 0 0 0)   | Mitochondrion inner membrane. Cell membrane; Peripheral membrane protein; Extracellular side.                                                                                                      |
| P68369 | TBA1A_MOUSE Tubulin alpha-1A chain OS=Mus musculus GN=Tuba1a PE=1 SV=1                      | 3.3E-15 | 150.3 | 30.60 | 128 (128 0 0 0 0) | Cytoplasm â€° cytoskeleton.                                                                                                                                                                        |
| Q9WV91 | FPRP_MOUSE Prostaglandin F2 receptor negative regulator OS=Mus musculus GN=Ptgfrn PE=1 SV=1 | 1.7E-12 | 140.2 | 15.10 | 22 (22 0 0 0 0)   | Endoplasmic reticulum membrane; Single-pass type I membrane protein. Golgi apparatus â€° trans-Golgi network membrane; Single-pass type I                                                          |

*A novel role of mitochondria in muscle injury*

|        |                                                                                          |         |       |       |                 |                                                                                                                                                                        |
|--------|------------------------------------------------------------------------------------------|---------|-------|-------|-----------------|------------------------------------------------------------------------------------------------------------------------------------------------------------------------|
|        |                                                                                          |         |       |       |                 | membrane protein.                                                                                                                                                      |
| P10107 | ANXA1_MOUSE Annexin A1 OS=Mus musculus GN=Anxa1 PE=1 SV=2                                | 2.5E-12 | 150.3 | 42.80 | 27 (27 0 0 0 0) | Nucleus. Cytoplasm. Cell projection &circledR cilium. Basolateral cell membrane.                                                                                       |
| P16381 | DDX3L_MOUSE Putative ATP-dependent RNA helicase P110 OS=Mus musculus GN=D1Pas1 PE=1 SV=1 | 6.8E-12 | 138.3 | 22.60 | 18 (17 1 0 0 0) | ND                                                                                                                                                                     |
| P19324 | SERPH_MOUSE Serpin H1 OS=Mus musculus GN=Serpinh1 PE=1 SV=2                              | 6.0E-12 | 148.3 | 33.10 | 24 (23 1 0 0 0) | Endoplasmic reticulum lumen.                                                                                                                                           |
| P02469 | LAMB1_MOUSE Laminin subunit beta-1 OS=Mus musculus GN=Lamb1-1 PE=1 SV=2                  | 4.3E-11 | 130.2 | 7.20  | 14 (14 0 0 0 0) | Secreted &circledR extracellular space &circledR extracellular matrix &circledR basement membrane.                                                                     |
| Q8CGC7 | SYEP_MOUSE Bifunctional aminoacyl-tRNA synthetase OS=Mus musculus GN=Eprs PE=2 SV=3      | 1.1E-11 | 140.3 | 11.70 | 15 (15 0 0 0 0) | ND                                                                                                                                                                     |
| P17182 | ENOA_MOUSE Alpha-enolase OS=Mus musculus GN=Eno1 PE=1 SV=3                               | 2.6E-13 | 136.3 | 26.50 | 16 (14 2 0 0 0) | Cytoplasm. Cell membrane.                                                                                                                                              |
| P11688 | ITA5_MOUSE Integrin alpha-5 OS=Mus musculus GN=Itga5 PE=1 SV=2                           | 2.1E-11 | 130.2 | 14.30 | 26 (26 0 0 0 0) | Membrane; Single-pass type I membrane protein.                                                                                                                         |
| P08249 | MDHM_MOUSE Malate dehydrogenase, mitochondrial OS=Mus musculus GN=Mdh2 PE=1 SV=3         | 1.0E-30 | 130.4 | 43.80 | 15 (15 0 0 0 0) | Mitochondrion matrix.                                                                                                                                                  |
| Q68FD5 | CLH_MOUSE Clathrin heavy chain 1 OS=Mus musculus GN=Cltc PE=1 SV=3                       | 1.2E-11 | 130.3 | 8.50  | 16 (16 0 0 0 0) | Cytoplasmic vesicle membrane; Peripheral membrane protein; Cytoplasmic side. Membrane &circledR coated pit; Peripheral membrane protein; Cytoplasmic side. Melanosome. |
| P02468 | LAMC1_MOUSE Laminin subunit gamma-1 OS=Mus musculus GN=Lamc1 PE=1 SV=2                   | 1.2E-11 | 120.3 | 8.10  | 17 (17 0 0 0 0) | Secreted &circledR extracellular space &circledR extracellular matrix &circledR basement                                                                               |

*A novel role of mitochondria in muscle injury*

|        |                                                                                                     |         |       |       |                 |                                                                                               |
|--------|-----------------------------------------------------------------------------------------------------|---------|-------|-------|-----------------|-----------------------------------------------------------------------------------------------|
|        |                                                                                                     |         |       |       |                 | membrane.                                                                                     |
| Q8JZQ9 | EIF3B_MOUSE Eukaryotic translation initiation factor 3 subunit B OS=Mus musculus GN=Eif3b PE=1 SV=1 | 5.8E-10 | 120.3 | 17.20 | 12 (12 0 0 0 0) | Cytoplasm.                                                                                    |
| Q62470 | ITA3_MOUSE Integrin alpha-3 OS=Mus musculus GN=Itga3 PE=1 SV=1                                      | 1.7E-11 | 110.2 | 10.60 | 17 (17 0 0 0 0) | Membrane; Single-pass type I membrane protein.                                                |
| P62908 | RS3_MOUSE 40S ribosomal protein S3 OS=Mus musculus GN=Rps3 PE=1 SV=1                                | 1.6E-11 | 120.3 | 46.50 | 29 (29 0 0 0 0) | Cytoplasm.                                                                                    |
| P29533 | VCAM1_MOUSE Vascular cell adhesion protein 1 OS=Mus musculus GN=Vcam1 PE=1 SV=1                     | 6.1E-14 | 120.3 | 20.30 | 16 (16 0 0 0 0) | Cell membrane; Single-pass type I membrane protein. Cell membrane; Lipid-anchor ° GPI-anchor. |
| P23116 | EIF3A_MOUSE Eukaryotic translation initiation factor 3 subunit A OS=Mus musculus GN=Eif3a PE=1 SV=4 | 1.9E-09 | 120.2 | 7.40  | 13 (13 0 0 0 0) | Cytoplasm. Cytoplasm ° cytoskeleton ° centrosome. Nucleus.                                    |
| Q922U2 | K2C5_MOUSE Keratin, type II cytoskeletal 5 OS=Mus musculus GN=Krt5 PE=1 SV=1                        | 2.8E-10 | 100.2 | 12.20 | 64 (64 0 0 0 0) | ND                                                                                            |
| Q99K48 | NONO_MOUSE Non-POU domain-containing octamer-binding protein OS=Mus musculus GN=Nono PE=1 SV=3      | 2.1E-11 | 120.2 | 27.30 | 12 (12 0 0 0 0) | Nucleus.                                                                                      |
| P10852 | 4F2_MOUSE 4F2 cell-surface antigen heavy chain OS=Mus musculus GN=Slc3a2 PE=1 SV=1                  | 1.4E-08 | 100.2 | 17.10 | 22 (22 0 0 0 0) | Apical cell membrane; Single-pass type II membrane protein. Melanosome.                       |
| Q8R422 | CD109_MOUSE CD109 antigen OS=Mus musculus GN=Cd109 PE=2 SV=1                                        | 1.0E-13 | 110.3 | 9.50  | 16 (16 0 0 0 0) | Cell membrane; Lipid-anchor ° GPI-anchor.                                                     |
| P37889 | FBLN2_MOUSE Fibulin-2 OS=Mus musculus GN=Fbln2 PE=1 SV=1                                            | 2.2E-15 | 110.2 | 5.00  | 52 (52 0 0 0 0) | Secreted ° extracellular space ° extracellular matrix.                                        |
| P16858 | G3P_MOUSE Glyceraldehyde-3-phosphate dehydrogenase OS=Mus musculus GN=Gapdh PE=1 SV=2               | 2.0E-10 | 98.2  | 16.50 | 38 (35 3 0 0 0) | Cytoplasm ° cytosol. Nucleus.                                                                 |

*A novel role of mitochondria in muscle injury*

|        |                                                                                                                |         |       |       |                    |                                                                                                                                                                                                                                                                                                   |
|--------|----------------------------------------------------------------------------------------------------------------|---------|-------|-------|--------------------|---------------------------------------------------------------------------------------------------------------------------------------------------------------------------------------------------------------------------------------------------------------------------------------------------|
| Q69ZN7 | MYOF_MOUSE Myoferlin<br>OS=Mus musculus<br>GN=Myof PE=1 SV=2                                                   | 1.8E-10 | 110.2 | 6.60  | 18 (18 0 0 0<br>0) | Cell membrane;<br>Single-pass type II<br>membrane protein.<br>Nucleus<br>membrane; Single-<br>pass type II<br>membrane protein.<br>Cytoplasmic<br>vesicle membrane;<br>Single-pass type II<br>membrane protein.                                                                                   |
| P26041 | MOES_MOUSE Moesin<br>OS=Mus musculus<br>GN=Msn PE=1 SV=3                                                       | 3.8E-11 | 110.2 | 18.40 | 11 (11 0 0 0<br>0) | Cell membrane;<br>Peripheral<br>membrane protein;<br>Cytoplasmic side.<br>Cytoplasmic<br>cytoskeleton.<br>Apical cell<br>membrane;<br>Peripheral<br>membrane protein;<br>Cytoplasmic side.<br>Cell projection<br>microvillus<br>membrane;<br>Peripheral<br>membrane protein;<br>Cytoplasmic side. |
| Q64521 | GPDM_MOUSE Glycerol-<br>3-phosphate<br>dehydrogenase,<br>mitochondrial OS=Mus<br>musculus GN=Gpd2 PE=1<br>SV=2 | 1.6E-07 | 110.2 | 15.30 | 18 (18 0 0 0<br>0) | Mitochondrion<br>inner membrane.                                                                                                                                                                                                                                                                  |
| Q9EP71 | RAI14_MOUSE<br>Ankyrin OS=Mus<br>musculus GN=Rai14 PE=1<br>SV=1                                                | 4.1E-09 | 110.2 | 12.90 | 12 (12 0 0 0<br>0) | Cytoplasmic cell<br>cortex. Cytoplasmic<br>cytoskeleton.                                                                                                                                                                                                                                          |
| P61979 | HNRPK_MOUSE<br>Heterogeneous nuclear<br>ribonucleoprotein K<br>OS=Mus musculus<br>GN=Hnrpk PE=1 SV=1           | 2.9E-11 | 100.3 | 25.50 | 11 (11 0 0 0<br>0) | Cytoplasm.<br>Nucleoplasm.                                                                                                                                                                                                                                                                        |
| P21981 | TGM2_MOUSE Protein-<br>glutamine gamma-<br>glutamyltransferase 2<br>OS=Mus musculus<br>GN=Tgm2 PE=1 SV=4       | 1.4E-11 | 90.3  | 13.80 | 12 (12 0 0 0<br>0) | ND                                                                                                                                                                                                                                                                                                |
| Q01853 | TERA_MOUSE<br>Transitional endoplasmic<br>reticulum ATPase OS=Mus<br>musculus GN=Vcp PE=1<br>SV=4              | 2.2E-11 | 100.3 | 15.60 | 10 (10 0 0 0<br>0) | Cytoplasmic<br>cytosol. Nucleus.                                                                                                                                                                                                                                                                  |
| Q9QXS6 | DREB_MOUSE Drebrin<br>OS=Mus musculus                                                                          | 2.6E-14 | 100.3 | 15.70 | 15 (15 0 0 0<br>0) | Cytoplasm.                                                                                                                                                                                                                                                                                        |

*A novel role of mitochondria in muscle injury*

|        |                                                                                                            |         |       |       |                   |                                                                                              |
|--------|------------------------------------------------------------------------------------------------------------|---------|-------|-------|-------------------|----------------------------------------------------------------------------------------------|
|        | GN=Dbn1 PE=1 SV=4                                                                                          |         |       |       |                   |                                                                                              |
| Q8R1B4 | EIF3C_MOUSE Eukaryotic translation initiation factor 3 subunit C OS=Mus musculus GN=Eif3c PE=1 SV=1        | 2.4E-09 | 90.2  | 9.50  | 10 (10 0 0 0 0)   | Cytoplasm.                                                                                   |
| Q9DB77 | QCR2_MOUSE Cytochrome b-c1 complex subunit 2, mitochondrial OS=Mus musculus GN=Uqcr2 PE=1 SV=1             | 9.7E-12 | 100.3 | 24.50 | 10 (10 0 0 0 0)   | Mitochondrion inner membrane; Peripheral membrane protein; Matrix side.                      |
| P10126 | EF1A1_MOUSE Elongation factor 1-alpha 1 OS=Mus musculus GN=Eef1a1 PE=1 SV=3                                | 6.7E-10 | 100.2 | 19.00 | 56 (56 0 0 0 0)   | Cytoplasm.                                                                                   |
| P02535 | K1C10_MOUSE Keratin, type I cytoskeletal 10 OS=Mus musculus GN=Krt10 PE=1 SV=3                             | 6.8E-11 | 90.2  | 11.10 | 145 (145 0 0 0 0) | ND                                                                                           |
| Q9D8E6 | RL4_MOUSE 60S ribosomal protein L4 OS=Mus musculus GN=Rpl4 PE=1 SV=3                                       | 2.0E-08 | 100.2 | 25.30 | 17 (17 0 0 0 0)   | ND                                                                                           |
| Q8BMK4 | CKAP4_MOUSE Cytoskeleton-associated protein 4 OS=Mus musculus GN=Ckap4 PE=2 SV=2                           | 3.0E-10 | 100.2 | 20.50 | 12 (12 0 0 0 0)   | Endoplasmic reticulum-Golgi intermediate compartment membrane; Single-pass membrane protein. |
| Q99KI0 | ACON_MOUSE Aconitate hydratase, mitochondrial OS=Mus musculus GN=Aco2 PE=1 SV=1                            | 2.1E-12 | 100.2 | 17.30 | 13 (13 0 0 0 0)   | Mitochondrion.                                                                               |
| Q9JIK5 | DDX21_MOUSE Nucleolar RNA helicase 2 OS=Mus musculus GN=Ddx21 PE=1 SV=2                                    | 1.6E-09 | 100.2 | 14.10 | 13 (13 0 0 0 0)   | Nucleus â€° nucleolus.                                                                       |
| Q99MR8 | MCCA_MOUSE Methylcrotonoyl-CoA carboxylase subunit alpha, mitochondrial OS=Mus musculus GN=Mccc1 PE=2 SV=2 | 2.3E-14 | 80.3  | 11.20 | 10 (10 0 0 0 0)   | Mitochondrion matrix.                                                                        |
| Q6ZQ38 | CAND1_MOUSE Cullin-associated NEDD8-dissociated protein 1 OS=Mus musculus GN=Cand1 PE=2 SV=2               | 7.6E-09 | 100.2 | 8.90  | 10 (10 0 0 0 0)   | Nucleus.                                                                                     |
| O35129 | PHB2_MOUSE Prohibitin-2 OS=Mus musculus GN=Phb2 PE=1 SV=1                                                  | 4.8E-10 | 80.2  | 29.10 | 15 (15 0 0 0 0)   | Mitochondrion inner membrane. Cytoplasm. Nucleus.                                            |
| P60710 | ACTB_MOUSE Actin, cytoplasmic 1 OS=Mus                                                                     | 1.0E-13 | 90.3  | 16.30 | 131 (125 6 0 0 0) | Cytoplasm â€° cytoskeleton.                                                                  |

*A novel role of mitochondria in muscle injury*

|        |                                                                                                                       |         |      |       |                 |                                                                                                                          |
|--------|-----------------------------------------------------------------------------------------------------------------------|---------|------|-------|-----------------|--------------------------------------------------------------------------------------------------------------------------|
|        | musculus GN=Actb PE=1 SV=1                                                                                            |         |      |       |                 |                                                                                                                          |
| Q9QZF2 | GPC1_MOUSE Glypican-1 OS=Mus musculus GN=Gpc1 PE=1 SV=1                                                               | 4.9E-14 | 90.3 | 19.40 | 37 (37 0 0 0 0) | Cell membrane; Lipid-anchor ° GPI-anchor; Extracellular side. Secreted ° extracellular space.                            |
| Q8VEK3 | HNRPU_MOUSE Heterogeneous nuclear ribonucleoprotein U OS=Mus musculus GN=Hnrpu PE=1 SV=1                              | 3.7E-10 | 90.3 | 13.30 | 13 (13 0 0 0 0) | Nucleus. Cytoplasm. Cell surface.                                                                                        |
| O54890 | ITB3_MOUSE Integrin beta-3 OS=Mus musculus GN=Itgb3 PE=2 SV=1                                                         | 1.4E-10 | 90.2 | 13.50 | 21 (21 0 0 0 0) | Membrane; Single-pass type I membrane protein.                                                                           |
| P08121 | CO3A1_MOUSE Collagen alpha-1(III) chain OS=Mus musculus GN=Col3a1 PE=2 SV=4                                           | 4.4E-10 | 80.2 | 7.50  | 12 (12 0 0 0 0) | Secreted ° extracellular space ° extracellular matrix.                                                                   |
| Q91YQ5 | RPN1_MOUSE Dolichyl-diphosphooligosaccharide--protein glycosyltransferase subunit 1 OS=Mus musculus GN=Rpn1 PE=2 SV=1 | 1.1E-11 | 90.2 | 17.80 | 10 (10 0 0 0 0) | Endoplasmic reticulum membrane; Single-pass type I membrane protein. Melanosome.                                         |
| Q3U7R1 | ESYT1_MOUSE Extended synaptotagmin-1 OS=Mus musculus GN=Esy1 PE=2 SV=2                                                | 4.1E-10 | 90.2 | 11.10 | 10 (10 0 0 0 0) | Membrane; Multi-pass membrane protein. Endomembrane system; Multi-pass membrane protein.                                 |
| Q8BKG3 | PTK7_MOUSE Tyrosine-protein kinase-like 7 OS=Mus musculus GN=Ptk7 PE=1 SV=1                                           | 3.5E-10 | 90.2 | 11.10 | 9 (9 0 0 0 0)   | Membrane; Single-pass type I membrane protein. Cell junction.                                                            |
| P54116 | STOM_MOUSE Erythrocyte band 7 integral membrane protein OS=Mus musculus GN=Stom PE=1 SV=3                             | 1.1E-15 | 70.3 | 20.80 | 7 (7 0 0 0 0)   | Cell membrane; Peripheral membrane protein; Cytoplasmic side. Cell membrane; Lipid-anchor; Cytoplasmic side. Melanosome. |
| P39061 | COIA1_MOUSE Collagen alpha-1(XVIII) chain OS=Mus musculus GN=Col18a1 PE=1 SV=4                                        | 4.5E-11 | 70.3 | 5.80  | 13 (13 0 0 0 0) | Secreted ° extracellular space ° extracellular matrix.                                                                   |
| P13020 | GELS_MOUSE Gelsolin OS=Mus musculus GN=Gsn PE=1 SV=3                                                                  | 3.9E-09 | 90.2 | 14.40 | 10 (10 0 0 0 0) | Cytoplasm ° cytoskeleton. Secreted.                                                                                      |
| P26443 | DHE3_MOUSE Glutamate dehydrogenase 1, mitochondrial OS=Mus musculus GN=Glud1 PE=1                                     | 1.3E-10 | 90.2 | 17.90 | 10 (10 0 0 0 0) | Mitochondrion matrix.                                                                                                    |

|        |                                                                                              |         |      |       |                   |                                                                                                                                  |
|--------|----------------------------------------------------------------------------------------------|---------|------|-------|-------------------|----------------------------------------------------------------------------------------------------------------------------------|
|        | SV=1                                                                                         |         |      |       |                   |                                                                                                                                  |
| P15379 | CD44_MOUSE CD44 antigen OS=Mus musculus GN=Cd44 PE=1 SV=3                                    | 5.8E-09 | 90.2 | 8.50  | 45 (45 0 0 0 0)   | Membrane; Single-pass type I membrane protein.                                                                                   |
| P70206 | PLXA1_MOUSE Plexin-A1 OS=Mus musculus GN=Plxna1 PE=1 SV=1                                    | 8.5E-09 | 90.2 | 4.60  | 9 (9 0 0 0 0)     | Membrane; Single-pass type I membrane protein.                                                                                   |
| B0V2N1 | PTPRS_MOUSE Receptor-type tyrosine-protein phosphatase S OS=Mus musculus GN=Ptpns PE=2 SV=1  | 3.5E-09 | 70.2 | 4.90  | 7 (7 0 0 0 0)     | Membrane; Single-pass type I membrane protein.                                                                                   |
| P17710 | HXK1_MOUSE Hexokinase-1 OS=Mus musculus GN=Hk1 PE=1 SV=2                                     | 2.5E-07 | 90.2 | 9.40  | 10 (10 0 0 0 0)   | Mitochondrion outer membrane; Peripheral membrane protein. Membrane.                                                             |
| P42932 | TCPQ_MOUSE T-complex protein 1 subunit theta OS=Mus musculus GN=Cct8 PE=1 SV=3               | 6.9E-11 | 70.2 | 14.10 | 7 (7 0 0 0 0)     | Cytoplasm. Cytoplasmic centrosome.                                                                                               |
| O08638 | MYH11_MOUSE Myosin-11 OS=Mus musculus GN=Myh11 PE=1 SV=1                                     | 2.4E-12 | 88.3 | 3.70  | 101 (72 29 0 0 0) | Melanosome. Cytoplasmic myofibril.                                                                                               |
| P14685 | PSMD3_MOUSE 26S proteasome non-ATPase regulatory subunit 3 OS=Mus musculus GN=Psm3 PE=2 SV=2 | 5.7E-10 | 70.2 | 17.20 | 7 (7 0 0 0 0)     | ND                                                                                                                               |
| Q61881 | MCM7_MOUSE DNA replication licensing factor MCM7 OS=Mus musculus GN=Mcm7 PE=2 SV=1           | 6.4E-08 | 70.2 | 10.00 | 8 (8 0 0 0 0)     | Nucleus.                                                                                                                         |
| P68372 | TBB2C_MOUSE Tubulin beta-2C chain OS=Mus musculus GN=Tubb2c PE=1 SV=1                        | 9.0E-11 | 88.2 | 14.20 | 37 (34 3 0 0 0)   | Cytoplasmic cytoskeleton.                                                                                                        |
| Q8BFZ3 | ACTBL_MOUSE Beta-actin-like protein 2 OS=Mus musculus GN=Actbl2 PE=2 SV=1                    | 1.1E-16 | 82.3 | 21.80 | 105 (11 92 1 1 0) | Cytoplasmic cytoskeleton.                                                                                                        |
| Q3TTY5 | K22E_MOUSE Keratin, type II cytoskeletal 2 epidermal OS=Mus musculus GN=Krt2 PE=1 SV=1       | 1.6E-09 | 70.2 | 5.00  | 67 (67 0 0 0 0)   | ND                                                                                                                               |
| Q62165 | DAG1_MOUSE Dystroglycan OS=Mus musculus GN=Dag1 PE=1 SV=4                                    | 3.3E-15 | 70.2 | 8.40  | 11 (11 0 0 0 0)   | Secreted extracellular space. Cell membrane; Single-pass type I membrane protein. Cytoplasmic cytoskeleton. Nucleus nucleoplasm. |

|        |                                                                                             |         |      |       |                 |                                                                                                                                                     |
|--------|---------------------------------------------------------------------------------------------|---------|------|-------|-----------------|-----------------------------------------------------------------------------------------------------------------------------------------------------|
| Q9Z110 | P5CS_MOUSE Delta-1-pyrroline-5-carboxylate synthetase OS=Mus musculus GN=Aldh18a1 PE=2 SV=1 | 3.1E-08 | 70.2 | 10.10 | 7 (7 0 0 0 0)   | Mitochondrion inner membrane.                                                                                                                       |
| Q9DCN2 | NB5R3_MOUSE NADH-cytochrome b5 reductase 3 OS=Mus musculus GN=Cyb5r3 PE=1 SV=3              | 5.1E-10 | 80.3 | 21.90 | 18 (18 0 0 0 0) | Endoplasmic reticulum membrane; Lipid-anchor; Cytoplasmic side. Mitochondrion outer membrane; Lipid-anchor; Cytoplasmic side. Cytoplasm &° cytosol. |
| Q60875 | ARHG2_MOUSE Rho guanine nucleotide exchange factor 2 OS=Mus musculus GN=Arhgef2 PE=1 SV=3   | 9.0E-12 | 80.3 | 9.10  | 10 (10 0 0 0 0) | Cytoplasm. Cell junction &° tight junction. Golgi apparatus. Cytoplasm &° cytoskeleton &° spindle.                                                  |
| Q68FL6 | SYMC_MOUSE Methionyl-tRNA synthetase, cytoplasmic OS=Mus musculus GN=Mars PE=2 SV=1         | 7.5E-12 | 80.3 | 11.00 | 8 (8 0 0 0 0)   | Cytoplasm.                                                                                                                                          |
| P67778 | PHB_MOUSE Prohibitin OS=Mus musculus GN=Phb PE=1 SV=1                                       | 9.0E-10 | 80.3 | 32.70 | 8 (8 0 0 0 0)   | Mitochondrion inner membrane.                                                                                                                       |
| P61161 | ARP2_MOUSE Actin-related protein 2 OS=Mus musculus GN=Actr2 PE=1 SV=1                       | 8.9E-15 | 80.3 | 21.30 | 8 (8 0 0 0 0)   | Cytoplasm &° cytoskeleton. Cell projection.                                                                                                         |
| P14148 | RL7_MOUSE 60S ribosomal protein L7 OS=Mus musculus GN=Rpl7 PE=2 SV=2                        | 4.9E-10 | 70.2 | 28.10 | 13 (13 0 0 0 0) | ND                                                                                                                                                  |
| Q3THE2 | ML12B_MOUSE Myosin regulatory light chain 12B OS=Mus musculus GN=Myl12b PE=1 SV=2           | 8.5E-09 | 70.2 | 29.70 | 9 (9 0 0 0 0)   | ND                                                                                                                                                  |
| P09405 | NUCL_MOUSE Nucleolin OS=Mus musculus GN=Ncl PE=1 SV=2                                       | 4.3E-13 | 80.2 | 13.60 | 12 (12 0 0 0 0) | Nucleus &° nucleolus. Cytoplasm.                                                                                                                    |
| P15116 | CADH2_MOUSE Cadherin-2 OS=Mus musculus GN=Cdh2 PE=1 SV=1                                    | 1.4E-12 | 80.2 | 12.80 | 14 (14 0 0 0 0) | Cell membrane; Single-pass type I membrane protein.                                                                                                 |
| Q61982 | NOTC3_MOUSE Neurogenic locus notch homolog protein 3 OS=Mus musculus GN=Notch3 PE=1 SV=1    | 1.3E-14 | 80.2 | 3.90  | 11 (11 0 0 0 0) | Cell membrane; Single-pass type I membrane protein. Nucleus.                                                                                        |



*A novel role of mitochondria in muscle injury*

|        |                                                                                                              |         |      |       |                 |                                                |
|--------|--------------------------------------------------------------------------------------------------------------|---------|------|-------|-----------------|------------------------------------------------|
| Q8BMJ2 | SYLC_MOUSE Leucyl-tRNA synthetase, cytoplasmic OS=Mus musculus GN=Lars PE=2 SV=2                             | 2.4E-09 | 80.2 | 8.40  | 8 (8 0 0 0 0)   | Cytoplasm.                                     |
| P57780 | ACTN4_MOUSE Alpha-actinin-4 OS=Mus musculus GN=Actn4 PE=1 SV=1                                               | 3.0E-10 | 80.2 | 9.90  | 8 (8 0 0 0 0)   | Nucleus.<br>Cytoplasm.                         |
| Q61781 | K1C14_MOUSE Keratin, type I cytoskeletal 14 OS=Mus musculus GN=Krt14 PE=1 SV=2                               | 1.1E-13 | 68.3 | 15.70 | 27 (25 2 0 0 0) | Cytoplasm.<br>Nucleus.                         |
| Q920B9 | SP16H_MOUSE FACT complex subunit SPT16 OS=Mus musculus GN=Supt16h PE=1 SV=2                                  | 1.9E-11 | 80.2 | 7.70  | 8 (8 0 0 0 0)   | Nucleus.<br>Chromosome.                        |
| Q922D8 | C1TC_MOUSE C-1-tetrahydrofolate synthase, cytoplasmic OS=Mus musculus GN=Mthfd1 PE=1 SV=3                    | 7.3E-09 | 80.2 | 10.10 | 8 (8 0 0 0 0)   | Cytoplasm.                                     |
| Q91YE6 | IPO9_MOUSE Importin-9 OS=Mus musculus GN=Ipo9 PE=1 SV=3                                                      | 4.1E-09 | 60.3 | 7.00  | 6 (6 0 0 0 0)   | Cytoplasm.<br>Nucleus.                         |
| Q01320 | TOP2A_MOUSE DNA topoisomerase 2-alpha OS=Mus musculus GN=Top2a PE=1 SV=1                                     | 3.6E-07 | 80.2 | 5.80  | 9 (9 0 0 0 0)   | Nucleus.                                       |
| Q9D051 | ODPB_MOUSE Pyruvate dehydrogenase E1 component subunit beta, mitochondrial OS=Mus musculus GN=Pdhb PE=1 SV=1 | 4.9E-11 | 60.2 | 13.90 | 6 (6 0 0 0 0)   | Mitochondrion matrix.                          |
| Q8VIJ6 | SFPQ_MOUSE Splicing factor, proline- and glutamine-rich OS=Mus musculus GN=Sfpq PE=1 SV=1                    | 2.6E-06 | 80.2 | 14.20 | 8 (8 0 0 0 0)   | Nucleus matrix.                                |
| Q07076 | ANXA7_MOUSE Annexin A7 OS=Mus musculus GN=Anxa7 PE=2 SV=1                                                    | 2.2E-06 | 80.2 | 15.60 | 9 (9 0 0 0 0)   | ND                                             |
| P35822 | PTPRK_MOUSE Receptor-type tyrosine-protein phosphatase kappa OS=Mus musculus GN=Ptpk PE=1 SV=1               | 7.0E-10 | 60.2 | 5.90  | 6 (6 0 0 0 0)   | Membrane; Single-pass type I membrane protein. |
| P58771 | TPM1_MOUSE Tropomyosin alpha-1 chain OS=Mus musculus GN=Tpm1 PE=1 SV=1                                       | 1.3E-09 | 78.2 | 23.20 | 11 (10 1 0 0 0) | Cytoplasm &° cytoskeleton.                     |
| Q9EQH3 | VPS35_MOUSE Vacuolar protein sorting-associated protein 35 OS=Mus                                            | 8.5E-10 | 60.2 | 8.70  | 6 (6 0 0 0 0)   | Cytoplasm.<br>Membrane;<br>Peripheral          |

|        |                                                                                                 |         |      |       |                 |                                                                                                                                              |
|--------|-------------------------------------------------------------------------------------------------|---------|------|-------|-----------------|----------------------------------------------------------------------------------------------------------------------------------------------|
|        | musculus GN=Vps35 PE=1 SV=1                                                                     |         |      |       |                 | membrane protein.                                                                                                                            |
| Q99PL5 | RRBP1_MOUSE<br>Ribosome-binding protein 1<br>OS=Mus musculus<br>GN=Rrbp1 PE=2 SV=2              | 1.0E-30 | 70.3 | 5.50  | 7 (7 0 0 0 0)   | Endoplasmic reticulum membrane; Single-pass type III membrane protein.                                                                       |
| Q9WU78 | PDC6I_MOUSE<br>Programmed cell death 6-interacting protein OS=Mus musculus GN=Pdcd6ip PE=1 SV=2 | 8.9E-09 | 70.3 | 9.20  | 7 (7 0 0 0 0)   | Cytoplasm $\hat{\epsilon}^{\circ}$ cytosol. Melanosome. Cytoplasm $\hat{\epsilon}^{\circ}$ cytoskeleton $\hat{\epsilon}^{\circ}$ centrosome. |
| Q8VDM4 | PSMD2_MOUSE 26S proteasome non-ATPase regulatory subunit 2 OS=Mus musculus GN=Psm2 PE=1 SV=1    | 6.6E-11 | 70.3 | 8.50  | 9 (9 0 0 0 0)   | ND                                                                                                                                           |
| O35639 | ANXA3_MOUSE Annexin A3 OS=Mus musculus GN=Anxa3 PE=2 SV=3                                       | 3.3E-15 | 70.3 | 25.10 | 7 (7 0 0 0 0)   | ND                                                                                                                                           |
| Q61739 | ITA6_MOUSE Integrin alpha-6 OS=Mus musculus GN=Itga6 PE=1 SV=2                                  | 2.1E-07 | 60.2 | 5.60  | 6 (6 0 0 0 0)   | Membrane; Single-pass type I membrane protein.                                                                                               |
| Q569Z5 | DDX46_MOUSE Probable ATP-dependent RNA helicase DDX46 OS=Mus musculus GN=Ddx46 PE=1 SV=2        | 2.6E-11 | 70.2 | 8.20  | 7 (7 0 0 0 0)   | Nucleus speckle. Nucleus $\hat{\epsilon}^{\circ}$ Cajal body.                                                                                |
| Q61753 | SERA_MOUSE D-3-phosphoglycerate dehydrogenase OS=Mus musculus GN=Phgdh PE=1 SV=3                | 5.7E-08 | 60.2 | 12.40 | 8 (8 0 0 0 0)   | ND                                                                                                                                           |
| Q99JY9 | ARP3_MOUSE Actin-related protein 3 OS=Mus musculus GN=Actr3 PE=1 SV=3                           | 1.9E-12 | 70.2 | 19.60 | 14 (14 0 0 0 0) | Cytoplasm $\hat{\epsilon}^{\circ}$ cytoskeleton. Cell projection.                                                                            |
| P62264 | RS14_MOUSE 40S ribosomal protein S14 OS=Mus musculus GN=Rps14 PE=2 SV=3                         | 1.6E-07 | 60.2 | 19.90 | 7 (7 0 0 0 0)   | ND                                                                                                                                           |
| P14602 | HSPB1_MOUSE Heat shock protein beta-1 OS=Mus musculus GN=Hspb1 PE=1 SV=3                        | 9.2E-13 | 70.2 | 39.20 | 20 (20 0 0 0 0) | Cytoplasm. Nucleus. Cytoplasm $\hat{\epsilon}^{\circ}$ cytoskeleton $\hat{\epsilon}^{\circ}$ spindle.                                        |
| P80314 | TCPB_MOUSE T-complex protein 1 subunit beta OS=Mus musculus GN=Cct2 PE=1 SV=4                   | 1.4E-10 | 70.2 | 14.20 | 8 (8 0 0 0 0)   | Cytoplasm.                                                                                                                                   |
| Q8R366 | IGSF8_MOUSE Immunoglobulin superfamily member 8 OS=Mus musculus                                 | 1.4E-10 | 70.2 | 11.50 | 10 (10 0 0 0 0) | Membrane; Single-pass membrane protein.                                                                                                      |

*A novel role of mitochondria in muscle injury*

|        |                                                                                                  |         |      |       |                 |                                                                                                                                                                         |
|--------|--------------------------------------------------------------------------------------------------|---------|------|-------|-----------------|-------------------------------------------------------------------------------------------------------------------------------------------------------------------------|
|        | GN=Igsf8 PE=1 SV=2                                                                               |         |      |       |                 |                                                                                                                                                                         |
| Q9Z1Q9 | SYVC_MOUSE Valyl-tRNA synthetase OS=Mus musculus GN=Vars PE=2 SV=1                               | 9.6E-12 | 70.2 | 7.80  | 8 (8 0 0 0 0)   | ND                                                                                                                                                                      |
| P05202 | AATM_MOUSE Aspartate aminotransferase, mitochondrial OS=Mus musculus GN=Got2 PE=1 SV=1           | 4.3E-09 | 70.2 | 12.60 | 9 (9 0 0 0 0)   | Mitochondrion matrix. Cell membrane.                                                                                                                                    |
| Q78PY7 | SND1_MOUSE Staphylococcal nuclease domain-containing protein 1 OS=Mus musculus GN=Snd1 PE=1 SV=1 | 2.8E-08 | 70.2 | 9.70  | 8 (8 0 0 0 0)   | Cytoplasm. Nucleus. Melanosome.                                                                                                                                         |
| Q9WVM1 | RGAP1_MOUSE Rac GTPase-activating protein 1 OS=Mus musculus GN=Racgap1 PE=2 SV=1                 | 2.2E-08 | 70.2 | 11.90 | 9 (9 0 0 0 0)   | Nucleus. Cytoplasm. Cytoplasm $\hat{\text{e}}$ cytoskeleton $\hat{\text{e}}$ spindle. Cytoplasmic vesicle $\hat{\text{e}}$ secretory vesicle $\hat{\text{e}}$ acrosome. |
| P11440 | CDC2_MOUSE Cell division control protein 2 homolog OS=Mus musculus GN=Cdc2 PE=1 SV=3             | 1.3E-09 | 50.2 | 19.50 | 10 (10 0 0 0 0) | Nucleus.                                                                                                                                                                |
| P62702 | RS4X_MOUSE 40S ribosomal protein S4, X isoform OS=Mus musculus GN=Rps4x PE=2 SV=2                | 1.9E-07 | 70.2 | 23.60 | 12 (12 0 0 0 0) | Cytoplasm.                                                                                                                                                              |
| Q04750 | TOP1_MOUSE DNA topoisomerase 1 OS=Mus musculus GN=Top1 PE=1 SV=2                                 | 1.2E-08 | 70.2 | 9.10  | 12 (12 0 0 0 0) | Nucleus $\hat{\text{e}}$ nucleolus. Nucleus $\hat{\text{e}}$ nucleoplasm.                                                                                               |
| Q60854 | SPB6_MOUSE Serpin B6 OS=Mus musculus GN=Serpib6 PE=2 SV=1                                        | 1.1E-08 | 70.2 | 15.30 | 7 (7 0 0 0 0)   | Cytoplasm.                                                                                                                                                              |
| Q62177 | SEM3B_MOUSE Semaphorin-3B OS=Mus musculus GN=Sema3b PE=2 SV=1                                    | 3.9E-09 | 70.2 | 8.70  | 8 (8 0 0 0 0)   | Secreted.                                                                                                                                                               |
| P19096 | FAS_MOUSE Fatty acid synthase OS=Mus musculus GN=Fasn PE=1 SV=2                                  | 7.8E-08 | 50.2 | 2.10  | 5 (5 0 0 0 0)   | Cytoplasm. Melanosome.                                                                                                                                                  |
| P61255 | RL26_MOUSE 60S ribosomal protein L26 OS=Mus musculus GN=Rpl26 PE=2 SV=1                          | 2.4E-07 | 70.2 | 31.00 | 9 (9 0 0 0 0)   | ND                                                                                                                                                                      |
| Q6PDM2 | SFRS1_MOUSE Splicing factor, arginine/serine-rich 1 OS=Mus musculus GN=Sfrs1 PE=1 SV=3           | 3.2E-07 | 70.1 | 23.80 | 16 (16 0 0 0 0) | Cytoplasm. Nucleus. Nucleus speckle.                                                                                                                                    |

*A novel role of mitochondria in muscle injury*

|        |                                                                                          |         |      |       |                 |                                                                                                                                 |
|--------|------------------------------------------------------------------------------------------|---------|------|-------|-----------------|---------------------------------------------------------------------------------------------------------------------------------|
| Q64475 | H2B1B_MOUSE Histone H2B type 1-B OS=Mus musculus GN=Hist1h2bb PE=1 SV=3                  | 9.6E-10 | 66.3 | 21.40 | 12 (9 3 0 0 0)  | Nucleus. Chromosome.                                                                                                            |
| Q9D379 | HYEP_MOUSE Epoxide hydrolase 1 OS=Mus musculus GN=Ephx1 PE=1 SV=1                        | 4.9E-07 | 50.2 | 9.70  | 7 (7 0 0 0 0)   | Microsome membrane; Single-pass type II membrane protein. Endoplasmic reticulum membrane; Single-pass type II membrane protein. |
| P47738 | ALDH2_MOUSE Aldehyde dehydrogenase, mitochondrial OS=Mus musculus GN=Aldh2 PE=1 SV=1     | 8.9E-12 | 60.3 | 15.00 | 10 (10 0 0 0 0) | Mitochondrion matrix.                                                                                                           |
| P47963 | RL13_MOUSE 60S ribosomal protein L13 OS=Mus musculus GN=Rpl13 PE=2 SV=3                  | 2.5E-07 | 50.2 | 21.80 | 5 (5 0 0 0 0)   | ND                                                                                                                              |
| Q501J6 | DDX17_MOUSE Probable ATP-dependent RNA helicase DDX17 OS=Mus musculus GN=Ddx17 PE=2 SV=1 | 1.8E-10 | 50.2 | 5.40  | 8 (8 0 0 0 0)   | Nucleus.                                                                                                                        |
| Q99JB2 | STML2_MOUSE Stomatin-like protein 2 OS=Mus musculus GN=Stoml2 PE=1 SV=1                  | 2.4E-10 | 60.3 | 22.40 | 6 (6 0 0 0 0)   | Membrane; Peripheral membrane protein. Cytoplasm. Cytoplasmic cytoskeleton.                                                     |
| P62991 | UBIQ_MOUSE Ubiquitin OS=Mus musculus GN=Rps27a PE=1 SV=1                                 | 9.6E-10 | 60.3 | 52.60 | 57 (57 0 0 0 0) | #N/A                                                                                                                            |
| Q922R8 | PDIA6_MOUSE Protein disulfide-isomerase A6 OS=Mus musculus GN=Pdia6 PE=1 SV=3            | 1.3E-09 | 60.2 | 19.10 | 11 (11 0 0 0 0) | Endoplasmic reticulum lumen. Cell membrane. Melanosome.                                                                         |
| P80318 | TCPG_MOUSE T-complex protein 1 subunit gamma OS=Mus musculus GN=Cct3 PE=1 SV=1           | 2.4E-06 | 50.2 | 12.70 | 7 (7 0 0 0 0)   | Cytoplasm.                                                                                                                      |
| Q9QWL7 | K1C17_MOUSE Keratin, type I cytoskeletal 17 OS=Mus musculus GN=Krt17 PE=1 SV=3           | 1.0E-07 | 50.2 | 6.50  | 9 (9 0 0 0 0)   | Cytoplasm.                                                                                                                      |
| P80315 | TCPD_MOUSE T-complex protein 1 subunit delta OS=Mus musculus GN=Cct4 PE=1 SV=3           | 8.4E-11 | 60.2 | 12.80 | 6 (6 0 0 0 0)   | Cytoplasm. Melanosome. Cytoplasmic cytoskeleton centrosome.                                                                     |
| P15864 | H12_MOUSE Histone H1.2 OS=Mus musculus                                                   | 7.8E-10 | 60.2 | 24.50 | 7 (7 0 0 0 0)   | Nucleus. Chromosome.                                                                                                            |

*A novel role of mitochondria in muscle injury*

|        |                                                                                 |         |      |       |                 |                                                                                                                                                                                                               |
|--------|---------------------------------------------------------------------------------|---------|------|-------|-----------------|---------------------------------------------------------------------------------------------------------------------------------------------------------------------------------------------------------------|
|        | GN=Hist1h1c PE=1 SV=2                                                           |         |      |       |                 |                                                                                                                                                                                                               |
| Q6IFZ6 | K2C1B_MOUSE Keratin, type II cytoskeletal 1b OS=Mus musculus GN=Krt77 PE=1 SV=1 | 2.8E-08 | 48.2 | 5.40  | 72 (69 3 0 0 0) | ND                                                                                                                                                                                                            |
| Q9R118 | HTRA1_MOUSE Serine protease HTRA1 OS=Mus musculus GN=Htra1 PE=2 SV=1            | 1.7E-10 | 60.2 | 10.40 | 8 (8 0 0 0 0)   | Secreted.                                                                                                                                                                                                     |
| P48036 | ANXA5_MOUSE Annexin A5 OS=Mus musculus GN=Anxa5 PE=1 SV=1                       | 2.3E-08 | 60.2 | 21.00 | 6 (6 0 0 0 0)   | ND                                                                                                                                                                                                            |
| P10493 | NID1_MOUSE Nidogen-1 OS=Mus musculus GN=Nid1 PE=1 SV=1                          | 1.7E-09 | 60.2 | 5.60  | 10 (10 0 0 0 0) | Secreted $\hat{\epsilon}^{\circ}$ extracellular space $\hat{\epsilon}^{\circ}$ extracellular matrix $\hat{\epsilon}^{\circ}$ basement membrane.                                                               |
| P62754 | RS6_MOUSE 40S ribosomal protein S6 OS=Mus musculus GN=Rps6 PE=1 SV=1            | 5.0E-07 | 60.2 | 16.50 | 6 (6 0 0 0 0)   | ND                                                                                                                                                                                                            |
| P62196 | PRS8_MOUSE 26S protease regulatory subunit 8 OS=Mus musculus GN=Psmc5 PE=1 SV=1 | 7.0E-10 | 60.2 | 15.30 | 6 (6 0 0 0 0)   | Cytoplasm. Nucleus.                                                                                                                                                                                           |
| P46471 | PRS7_MOUSE 26S protease regulatory subunit 7 OS=Mus musculus GN=Psmc2 PE=1 SV=5 | 2.0E-08 | 60.2 | 15.50 | 6 (6 0 0 0 0)   | Cytoplasm. Nucleus.                                                                                                                                                                                           |
| P84099 | RL19_MOUSE 60S ribosomal protein L19 OS=Mus musculus GN=Rpl19 PE=1 SV=1         | 2.2E-15 | 40.3 | 14.30 | 4 (4 0 0 0 0)   | ND                                                                                                                                                                                                            |
| Q9QZE5 | COPG_MOUSE Coatomer subunit gamma OS=Mus musculus GN=Copg PE=2 SV=1             | 2.3E-06 | 60.2 | 8.50  | 6 (6 0 0 0 0)   | Cytoplasm. Golgi apparatus membrane; Peripheral membrane protein; Cytoplasmic side. Cytoplasmic vesicle $\hat{\epsilon}^{\circ}$ COPI-coated vesicle membrane; Peripheral membrane protein; Cytoplasmic side. |
| P54761 | EPHB4_MOUSE Ephrin type-B receptor 4 OS=Mus musculus GN=Ephb4 PE=1 SV=1         | 5.5E-11 | 40.3 | 5.00  | 6 (6 0 0 0 0)   | Membrane; Single-pass type I membrane protein.                                                                                                                                                                |
| O08665 | SEM3A_MOUSE Semaphorin-3A OS=Mus musculus GN=Sema3a PE=1 SV=1                   | 3.7E-08 | 60.2 | 9.60  | 7 (7 0 0 0 0)   | Secreted.                                                                                                                                                                                                     |

*A novel role of mitochondria in muscle injury*

|        |                                                                                                                     |         |      |       |                    |                                                                                                                                                                                                                                                                                                                  |
|--------|---------------------------------------------------------------------------------------------------------------------|---------|------|-------|--------------------|------------------------------------------------------------------------------------------------------------------------------------------------------------------------------------------------------------------------------------------------------------------------------------------------------------------|
| P35700 | PRDX1_MOUSE<br>Peroxisome oxidoreductin-1 OS=Mus<br>musculus GN=Prdx1 PE=1<br>SV=1                                  | 1.5E-07 | 58.2 | 24.60 | 10 (6 4 0 0 0)     | Cytoplasm.<br>Melanosome.                                                                                                                                                                                                                                                                                        |
| P17156 | HSP72_MOUSE Heat<br>shock-related 70 kDa<br>protein 2 OS=Mus<br>musculus GN=Hspa2 PE=1<br>SV=1                      | 1.1E-15 | 40.2 | 6.00  | 7 (7 0 0 0 0)      | ND                                                                                                                                                                                                                                                                                                               |
| Q8BWT1 | THIM_MOUSE 3-<br>ketoacyl-CoA thiolase,<br>mitochondrial OS=Mus<br>musculus GN=Acaa2 PE=1<br>SV=2                   | 3.2E-10 | 58.2 | 15.60 | 6 (5 1 0 0 0)      | Mitochondrion.                                                                                                                                                                                                                                                                                                   |
| Q8CGP5 | H2A1F_MOUSE Histone<br>H2A type 1-F OS=Mus<br>musculus GN=Hist1h2af<br>PE=1 SV=3                                    | 3.9E-13 | 50.3 | 35.40 | 40 (40 0 0 0<br>0) | Nucleus.<br>Chromosome.                                                                                                                                                                                                                                                                                          |
| O35737 | HNRH1_MOUSE<br>Heterogeneous nuclear<br>ribonucleoprotein H<br>OS=Mus musculus<br>GN=Hnrph1 PE=1 SV=3               | 1.5E-13 | 50.3 | 15.40 | 9 (9 0 0 0 0)      | Nucleus &°<br>nucleoplasm.                                                                                                                                                                                                                                                                                       |
| Q9JIF7 | COPB_MOUSE Coatamer<br>subunit beta OS=Mus<br>musculus GN=Copb1 PE=1<br>SV=1                                        | 3.2E-10 | 50.3 | 6.80  | 5 (5 0 0 0 0)      | Cytoplasm. Golgi<br>apparatus<br>membrane;<br>Peripheral<br>membrane protein;<br>Cytoplasmic side.<br>Cytoplasmic<br>vesicle &° COPI-<br>coated vesicle<br>membrane;<br>Peripheral<br>membrane protein;<br>Cytoplasmic side.<br>Cell membrane.<br>Endoplasmic<br>reticulum-Golgi<br>intermediate<br>compartment. |
| P80317 | TCPZ_MOUSE T-complex<br>protein 1 subunit zeta<br>OS=Mus musculus<br>GN=Cct6a PE=1 SV=3                             | 2.2E-10 | 50.3 | 8.90  | 6 (6 0 0 0 0)      | Cytoplasm.                                                                                                                                                                                                                                                                                                       |
| P68040 | GBLP_MOUSE Guanine<br>nucleotide-binding protein<br>subunit beta-2-like 1<br>OS=Mus musculus<br>GN=Gnb2l1 PE=1 SV=3 | 6.0E-11 | 50.3 | 18.60 | 8 (8 0 0 0 0)      | Cell membrane;<br>Peripheral<br>membrane protein.<br>Cytoplasm.<br>Cytoplasm &°<br>perinuclear region.<br>Cytoplasm &°<br>cytoskeleton.<br>Nucleus.<br>Perikaryon. Cell                                                                                                                                          |

*A novel role of mitochondria in muscle injury*

|        |                                                                                                   |         |      |       |               |                                                                                                                                                                                 |
|--------|---------------------------------------------------------------------------------------------------|---------|------|-------|---------------|---------------------------------------------------------------------------------------------------------------------------------------------------------------------------------|
|        |                                                                                                   |         |      |       |               | projection &#x2013; dendrite.                                                                                                                                                   |
| P70696 | H2B1A_MOUSE Histone H2B type 1-A OS=Mus musculus GN=Hist1h2ba PE=2 SV=3                           | 3.7E-06 | 40.2 | 30.70 | 8 (8 0 0 0 0) | Nucleus. Chromosome.                                                                                                                                                            |
| P70168 | IMB1_MOUSE Importin subunit beta-1 OS=Mus musculus GN=Kpnb1 PE=1 SV=1                             | 3.9E-10 | 50.2 | 7.30  | 5 (5 0 0 0 0) | Cytoplasm. Nucleus envelope.                                                                                                                                                    |
| P70275 | SEM3E_MOUSE Semaphorin-3E OS=Mus musculus GN=Sema3e PE=2 SV=2                                     | 3.0E-10 | 40.2 | 4.50  | 4 (4 0 0 0 0) | Secreted.                                                                                                                                                                       |
| Q91ZA3 | PCCA_MOUSE Propionyl-CoA carboxylase alpha chain, mitochondrial OS=Mus musculus GN=Pcca PE=2 SV=2 | 1.9E-11 | 50.2 | 9.80  | 6 (6 0 0 0 0) | Mitochondrion matrix.                                                                                                                                                           |
| P05064 | ALDOA_MOUSE Fructose-bisphosphate aldolase A OS=Mus musculus GN=Aldoa PE=1 SV=2                   | 5.0E-08 | 50.2 | 18.40 | 6 (6 0 0 0 0) | ND                                                                                                                                                                              |
| P50446 | K2C6A_MOUSE Keratin, type II cytoskeletal 6A OS=Mus musculus GN=Krt6a PE=2 SV=3                   | 3.5E-07 | 40.2 | 6.00  | 8 (8 0 0 0 0) | ND                                                                                                                                                                              |
| P35980 | RL18_MOUSE 60S ribosomal protein L18 OS=Mus musculus GN=Rpl18 PE=2 SV=3                           | 9.2E-09 | 40.2 | 18.60 | 7 (7 0 0 0 0) | Cytoplasm.                                                                                                                                                                      |
| Q64487 | PTPRD_MOUSE Receptor-type tyrosine-protein phosphatase delta OS=Mus musculus GN=Ptprd PE=2 SV=2   | 2.9E-10 | 50.2 | 3.40  | 7 (7 0 0 0 0) | Membrane; Single-pass type I membrane protein.                                                                                                                                  |
| Q7TMB8 | CYFP1_MOUSE Cytoplasmic FMR1-interacting protein 1 OS=Mus musculus GN=Cyfip1 PE=1 SV=1            | 1.7E-07 | 50.2 | 4.20  | 5 (5 0 0 0 0) | Cytoplasm. Cytoplasm &#x2013; perinuclear region. Cell projection &#x2013; lamellipodium. Cell projection &#x2013; ruffle. Cell junction &#x2013; synapse &#x2013; synaptosome. |
| Q62371 | DDR2_MOUSE Discoidin domain-containing receptor 2 OS=Mus musculus GN=Ddr2 PE=2 SV=2               | 3.0E-07 | 40.2 | 3.90  | 4 (4 0 0 0 0) | Cell membrane; Single-pass type I membrane protein.                                                                                                                             |
| P70698 | PYRG1_MOUSE CTP synthase 1 OS=Mus                                                                 | 1.1E-11 | 50.2 | 9.50  | 5 (5 0 0 0 0) | ND                                                                                                                                                                              |

|        |                                                                                       |         |      |       |               |                                                                                                                                                 |
|--------|---------------------------------------------------------------------------------------|---------|------|-------|---------------|-------------------------------------------------------------------------------------------------------------------------------------------------|
|        | musculus GN=Ctps PE=1 SV=2                                                            |         |      |       |               |                                                                                                                                                 |
| O88322 | NID2_MOUSE Nidogen-2 OS=Mus musculus GN=Nid2 PE=1 SV=1                                | 3.1E-08 | 50.2 | 4.80  | 5 (5 0 0 0 0) | Secreted $\hat{\epsilon}^{\circ}$ extracellular space $\hat{\epsilon}^{\circ}$ extracellular matrix $\hat{\epsilon}^{\circ}$ basement membrane. |
| Q8C2Q3 | RBM14_MOUSE RNA-binding protein 14 OS=Mus musculus GN=Rbm14 PE=1 SV=1                 | 1.5E-09 | 50.2 | 11.10 | 5 (5 0 0 0 0) | Nucleus.                                                                                                                                        |
| P23927 | CRYAB_MOUSE Alpha-crystallin B chain OS=Mus musculus GN=Cryab PE=1 SV=2               | 2.7E-09 | 40.2 | 18.30 | 4 (4 0 0 0 0) | Cytoplasm. Nucleus.                                                                                                                             |
| P57776 | EF1D_MOUSE Elongation factor 1-delta OS=Mus musculus GN=Eef1d PE=1 SV=3               | 7.1E-09 | 50.2 | 26.70 | 6 (6 0 0 0 0) | ND                                                                                                                                              |
| Q61656 | DDX5_MOUSE Probable ATP-dependent RNA helicase DDX5 OS=Mus musculus GN=Ddx5 PE=1 SV=1 | 1.7E-07 | 50.2 | 7.20  | 5 (5 0 0 0 0) | Nucleus $\hat{\epsilon}^{\circ}$ nucleolus.                                                                                                     |
| Q6ZWN5 | RS9_MOUSE 40S ribosomal protein S9 OS=Mus musculus GN=Rps9 PE=2 SV=3                  | 3.2E-04 | 40.2 | 14.90 | 4 (4 0 0 0 0) | Cytoplasm.                                                                                                                                      |
| Q9D8N0 | EF1G_MOUSE Elongation factor 1-gamma OS=Mus musculus GN=Eef1g PE=1 SV=3               | 3.2E-11 | 50.2 | 12.60 | 6 (6 0 0 0 0) | ND                                                                                                                                              |
| P47911 | RL6_MOUSE 60S ribosomal protein L6 OS=Mus musculus GN=Rpl6 PE=1 SV=3                  | 1.3E-11 | 50.2 | 15.20 | 5 (5 0 0 0 0) | ND                                                                                                                                              |
| O70309 | ITB5_MOUSE Integrin beta-5 OS=Mus musculus GN=Itgb5 PE=2 SV=2                         | 4.0E-06 | 40.2 | 5.50  | 4 (4 0 0 0 0) | Membrane; Single-pass type I membrane protein.                                                                                                  |
| P27546 | MAP4_MOUSE Microtubule-associated protein 4 OS=Mus musculus GN=Map4 PE=1 SV=3         | 1.3E-06 | 50.2 | 5.80  | 5 (5 0 0 0 0) | Cytoplasm $\hat{\epsilon}^{\circ}$ cytoskeleton.                                                                                                |
| P97351 | RS3A_MOUSE 40S ribosomal protein S3a OS=Mus musculus GN=Rps3a PE=1 SV=3               | 1.1E-11 | 50.2 | 17.00 | 5 (5 0 0 0 0) | Cytoplasm. Nucleus.                                                                                                                             |
| Q61699 | HS105_MOUSE Heat shock protein 105 kDa OS=Mus musculus GN=Hsph1 PE=1 SV=2             | 3.6E-08 | 50.2 | 6.40  | 5 (5 0 0 0 0) | Cytoplasm. Nucleus.                                                                                                                             |
| O35479 | HNRPG_MOUSE Heterogeneous nuclear                                                     | 1.1E-06 | 40.1 | 10.30 | 4 (4 0 0 0 0) | Nucleus.                                                                                                                                        |



|        |                                                                                                                           |         |      |       |               |                                                                                                                                                                                                                                                                                                                                                                            |
|--------|---------------------------------------------------------------------------------------------------------------------------|---------|------|-------|---------------|----------------------------------------------------------------------------------------------------------------------------------------------------------------------------------------------------------------------------------------------------------------------------------------------------------------------------------------------------------------------------|
|        | ribonucleoprotein G<br>OS=Mus musculus<br>GN=Rbmx PE=1 SV=1                                                               |         |      |       |               |                                                                                                                                                                                                                                                                                                                                                                            |
| P06151 | LDHA_MOUSE L-lactate<br>dehydrogenase A chain<br>OS=Mus musculus<br>GN=Ldha PE=1 SV=3                                     | 1.7E-05 | 40.1 | 12.00 | 5 (5 0 0 0 0) | Cytoplasm.                                                                                                                                                                                                                                                                                                                                                                 |
| P48962 | ADT1_MOUSE ADP/ATP<br>translocase 1 OS=Mus<br>musculus GN=Slc25a4<br>PE=1 SV=4                                            | 3.0E-08 | 38.2 | 11.10 | 6 (5 1 0 0 0) | Mitochondrion<br>inner membrane;<br>Multi-pass<br>membrane protein.                                                                                                                                                                                                                                                                                                        |
| P26040 | EZRI_MOUSE Ezrin<br>OS=Mus musculus GN=Ezr<br>PE=1 SV=3                                                                   | 2.9E-08 | 50.2 | 8.50  | 8 (8 0 0 0 0) | Apical cell<br>membrane;<br>Peripheral<br>membrane protein;<br>Cytoplasmic side.<br>Cell projection.<br>Cell projection °<br>microvillus<br>membrane;<br>Peripheral<br>membrane protein;<br>Cytoplasmic side.<br>Cell projection °<br>ruffle membrane;<br>Peripheral<br>membrane protein;<br>Cytoplasmic side.<br>Cytoplasm ° cell<br>cortex. Cytoplasm<br>° cytoskeleton. |
| P14733 | LMNB1_MOUSE Lamin-<br>B1 OS=Mus musculus<br>GN=Lmnb1 PE=1 SV=3                                                            | 6.4E-08 | 50.2 | 9.40  | 6 (6 0 0 0 0) | Nucleus inner<br>membrane; Lipid-<br>anchor;<br>Nucleoplasmic<br>side.                                                                                                                                                                                                                                                                                                     |
| Q9D6R2 | IDH3A_MOUSE Isocitrate<br>dehydrogenase [NAD]<br>subunit alpha,<br>mitochondrial OS=Mus<br>musculus GN=Idh3a PE=1<br>SV=1 | 1.0E-10 | 50.2 | 15.00 | 5 (5 0 0 0 0) | Mitochondrion.                                                                                                                                                                                                                                                                                                                                                             |
| Q9ERD7 | TBB3_MOUSE Tubulin<br>beta-3 chain OS=Mus<br>musculus GN=Tubb3 PE=1<br>SV=1                                               | 5.7E-08 | 46.3 | 7.80  | 9 (7 0 2 0 0) | Cytoplasm °<br>cytoskeleton.                                                                                                                                                                                                                                                                                                                                               |
| Q8VH51 | RBM39_MOUSE RNA-<br>binding protein 39 OS=Mus<br>musculus GN=Rbm39<br>PE=1 SV=1                                           | 1.5E-10 | 40.3 | 10.00 | 5 (5 0 0 0 0) | Nucleus.                                                                                                                                                                                                                                                                                                                                                                   |
| P60335 | PCBP1_MOUSE Poly(rC)-<br>binding protein 1 OS=Mus<br>musculus GN=Pcbp1 PE=1<br>SV=1                                       | 6.9E-12 | 40.3 | 12.40 | 5 (5 0 0 0 0) | Nucleus.                                                                                                                                                                                                                                                                                                                                                                   |

*A novel role of mitochondria in muscle injury*

|        |                                                                                                              |         |      |       |                 |                                                                                                                                                                                    |
|--------|--------------------------------------------------------------------------------------------------------------|---------|------|-------|-----------------|------------------------------------------------------------------------------------------------------------------------------------------------------------------------------------|
| Q9Z1Q5 | CLIC1_MOUSE Chloride intracellular channel protein<br>1 OS=Mus musculus<br>GN=Clic1 PE=1 SV=3                | 4.1E-11 | 40.3 | 20.70 | 6 (6 0 0 0 0)   | Nucleus. Nucleus membrane; Single-pass membrane protein.<br>Cytoplasm. Cell membrane; Single-pass membrane protein.                                                                |
| Q6A0A9 | F120A_MOUSE Constitutive coactivator of PPAR-gamma-like protein<br>1 OS=Mus musculus<br>GN=FAM120A PE=1 SV=2 | 8.9E-11 | 30.2 | 3.40  | 4 (4 0 0 0 0)   | Cytoplasm. Cell membrane; Peripheral membrane protein; Cytoplasmic side.                                                                                                           |
| P35951 | LDLR_MOUSE Low-density lipoprotein receptor<br>OS=Mus musculus<br>GN=Ldlr PE=1 SV=1                          | 3.7E-13 | 40.3 | 6.30  | 4 (4 0 0 0 0)   | Cell membrane; Single-pass type I membrane protein. Endomembrane system; Single-pass type I membrane protein. Membrane ° clathrin-coated pit; Single-pass type I membrane protein. |
| Q9DCH4 | EIF3F_MOUSE Eukaryotic translation initiation factor 3 subunit F<br>OS=Mus musculus GN=Eif3f PE=1 SV=1       | 8.4E-12 | 40.3 | 13.30 | 5 (5 0 0 0 0)   | Cytoplasm.                                                                                                                                                                         |
| Q9CXW4 | RL11_MOUSE 60S ribosomal protein L11<br>OS=Mus musculus<br>GN=Rpl11 PE=1 SV=4                                | 1.7E-08 | 30.2 | 17.40 | 3 (3 0 0 0 0)   | Nucleus ° nucleolus.                                                                                                                                                               |
| Q9CR57 | RL14_MOUSE 60S ribosomal protein L14<br>OS=Mus musculus<br>GN=Rpl14 PE=2 SV=3                                | 8.4E-09 | 30.2 | 17.10 | 8 (8 0 0 0 0)   | ND                                                                                                                                                                                 |
| Q9Z0M6 | CD97_MOUSE CD97 antigen<br>OS=Mus musculus<br>GN=Cd97 PE=1 SV=2                                              | 2.3E-11 | 40.2 | 7.00  | 5 (5 0 0 0 0)   | Cell membrane; Multi-pass membrane protein.                                                                                                                                        |
| P08730 | K1C13_MOUSE Keratin, type I cytoskeletal 13<br>OS=Mus musculus<br>GN=Krt13 PE=1 SV=2                         | 7.3E-07 | 30.2 | 4.60  | 25 (25 0 0 0 0) | ND                                                                                                                                                                                 |
| Q9CZD3 | SYG_MOUSE Glycyl-tRNA synthetase<br>OS=Mus musculus GN=Gars PE=1 SV=1                                        | 1.6E-12 | 40.2 | 6.90  | 4 (4 0 0 0 0)   | Cytoplasm. Mitochondrion.                                                                                                                                                          |
| Q6IFX2 | K1C42_MOUSE Keratin, type I cytoskeletal 42<br>OS=Mus musculus<br>GN=Krt42 PE=1 SV=1                         | 1.1E-07 | 30.2 | 6.90  | 15 (15 0 0 0 0) | Cytoplasm.                                                                                                                                                                         |
| Q9Z127 | LAT1_MOUSE Large neutral amino acids                                                                         | 6.0E-11 | 40.2 | 9.20  | 6 (6 0 0 0 0)   | Cytoplasm ° cytosol. Apical cell                                                                                                                                                   |

|        |                                                                                                              |         |      |       |                 |                                                                                  |
|--------|--------------------------------------------------------------------------------------------------------------|---------|------|-------|-----------------|----------------------------------------------------------------------------------|
|        | transporter small subunit 1<br>OS=Mus musculus<br>GN=Slc7a5 PE=1 SV=1                                        |         |      |       |                 | membrane; Multi-pass membrane protein.                                           |
| O70318 | E41L2_MOUSE Band 4.1-like protein 2 OS=Mus musculus GN=Epb4112 PE=1 SV=1                                     | 4.5E-09 | 40.2 | 4.90  | 4 (4 0 0 0 0)   | Cytoplasm &° cytoskeleton.                                                       |
| P51881 | ADT2_MOUSE ADP/ATP translocase 2 OS=Mus musculus GN=Slc25a5 PE=1 SV=3                                        | 4.6E-09 | 30.2 | 8.10  | 5 (4 1 0 0 0)   | Mitochondrion inner membrane; Multi-pass membrane protein.                       |
| Q8R2G6 | CCD80_MOUSE Coiled-coil domain-containing protein 80 OS=Mus musculus GN=Ccdc80 PE=1 SV=2                     | 1.0E-11 | 40.2 | 6.10  | 5 (5 0 0 0 0)   | Secreted &° extracellular space &° extracellular matrix.                         |
| Q80UG5 | SEPT9_MOUSE Septin-9 OS=Mus musculus GN=Sept9 PE=1 SV=1                                                      | 5.1E-09 | 40.2 | 10.10 | 5 (5 0 0 0 0)   | Cytoplasm &° cytoskeleton.                                                       |
| Q91ZV3 | DCBD2_MOUSE Discoidin, CUB and LCCL domain-containing protein 2 OS=Mus musculus GN=Dcbld2 PE=2 SV=1          | 1.9E-06 | 40.2 | 6.10  | 4 (4 0 0 0 0)   | Membrane; Single-pass type I membrane protein.                                   |
| P62242 | RS8_MOUSE 40S ribosomal protein S8 OS=Mus musculus GN=Rps8 PE=1 SV=2                                         | 1.1E-06 | 30.2 | 17.30 | 3 (3 0 0 0 0)   | Cytoplasm.                                                                       |
| P62830 | RL23_MOUSE 60S ribosomal protein L23 OS=Mus musculus GN=Rpl23 PE=2 SV=1                                      | 1.3E-07 | 40.2 | 20.00 | 4 (4 0 0 0 0)   | ND                                                                               |
| Q91VD9 | NDUS1_MOUSE NADH-ubiquinone oxidoreductase 75 kDa subunit, mitochondrial OS=Mus musculus GN=Ndufs1 PE=1 SV=1 | 1.4E-09 | 40.2 | 6.50  | 4 (4 0 0 0 0)   | Mitochondrion inner membrane.                                                    |
| Q8BP67 | RL24_MOUSE 60S ribosomal protein L24 OS=Mus musculus GN=Rpl24 PE=2 SV=2                                      | 7.4E-10 | 30.2 | 14.00 | 6 (6 0 0 0 0)   | ND                                                                               |
| P35564 | CALX_MOUSE Calnexin OS=Mus musculus GN=Canx PE=1 SV=1                                                        | 2.7E-14 | 40.2 | 7.40  | 8 (8 0 0 0 0)   | Endoplasmic reticulum membrane; Single-pass type I membrane protein. Melanosome. |
| P51660 | DHB4_MOUSE Peroxisomal multifunctional enzyme type 2 OS=Mus musculus GN=Hsd17b4 PE=1 SV=3                    | 1.7E-08 | 30.2 | 4.90  | 3 (3 0 0 0 0)   | Peroxisome.                                                                      |
| P04104 | K2C1_MOUSE Keratin, type II cytoskeletal 1                                                                   | 3.0E-09 | 30.2 | 3.80  | 65 (65 0 0 0 0) | Cell membrane.                                                                   |

|        |                                                                                                                       |         |      |       |               |                                                                                                                                                                                                                                            |
|--------|-----------------------------------------------------------------------------------------------------------------------|---------|------|-------|---------------|--------------------------------------------------------------------------------------------------------------------------------------------------------------------------------------------------------------------------------------------|
|        | OS=Mus musculus<br>GN=Krt1 PE=1 SV=4                                                                                  |         |      |       |               |                                                                                                                                                                                                                                            |
| Q01705 | NOTC1_MOUSE<br>Neurogenic locus notch<br>homolog protein 1 OS=Mus<br>musculus GN=Notch1<br>PE=1 SV=2                  | 5.9E-08 | 40.2 | 1.70  | 7 (7 0 0 0 0) | Cell membrane;<br>Single-pass type I<br>membrane protein.<br>Nucleus.                                                                                                                                                                      |
| Q91V41 | RAB14_MOUSE Ras-<br>related protein Rab-14<br>OS=Mus musculus<br>GN=Rab14 PE=1 SV=3                                   | 4.8E-05 | 30.2 | 18.10 | 3 (3 0 0 0 0) | Early endosome<br>membrane; Lipid-<br>anchor;<br>Cytoplasmic side.<br>Golgi apparatus<br>membrane; Lipid-<br>anchor;<br>Cytoplasmic side.<br>Golgi apparatus<br>trans-Golgi<br>network<br>membrane; Lipid-<br>anchor;<br>Cytoplasmic side. |
| P41105 | RL28_MOUSE 60S<br>ribosomal protein L28<br>OS=Mus musculus<br>GN=Rpl28 PE=1 SV=2                                      | 5.6E-08 | 40.2 | 18.20 | 4 (4 0 0 0 0) | ND                                                                                                                                                                                                                                         |
| P84078 | ARF1_MOUSE ADP-<br>ribosylation factor 1<br>OS=Mus musculus<br>GN=Arf1 PE=1 SV=2                                      | 4.1E-10 | 40.2 | 25.40 | 4 (4 0 0 0 0) | Golgi apparatus.<br>Cytoplasm<br>perinuclear region.                                                                                                                                                                                       |
| P47915 | RL29_MOUSE 60S<br>ribosomal protein L29<br>OS=Mus musculus<br>GN=Rpl29 PE=2 SV=2                                      | 1.3E-06 | 40.2 | 21.30 | 5 (5 0 0 0 0) | ND                                                                                                                                                                                                                                         |
| P84104 | SFRS3_MOUSE Splicing<br>factor, arginine/serine-rich<br>3 OS=Mus musculus<br>GN=Sfrs3 PE=2 SV=1                       | 2.2E-10 | 30.2 | 20.10 | 4 (4 0 0 0 0) | Nucleus.                                                                                                                                                                                                                                   |
| P61022 | CHP1_MOUSE Calcium-<br>binding protein p22<br>OS=Mus musculus<br>GN=Chp PE=2 SV=2                                     | 8.8E-08 | 30.2 | 18.50 | 3 (3 0 0 0 0) | Cytoplasm.                                                                                                                                                                                                                                 |
| P17751 | TPIS_MOUSE<br>Triosephosphate isomerase<br>OS=Mus musculus<br>GN=Tpi1 PE=1 SV=3                                       | 3.1E-10 | 40.2 | 20.50 | 5 (5 0 0 0 0) | ND                                                                                                                                                                                                                                         |
| Q61820 | RANT_MOUSE GTP-<br>binding nuclear protein<br>Ran, testis-specific isoform<br>OS=Mus musculus<br>GN=Rasl2-9 PE=2 SV=1 | 5.9E-07 | 30.2 | 10.60 | 3 (3 0 0 0 0) | Nucleus.                                                                                                                                                                                                                                   |
| P33175 | KIF5A_MOUSE Kinesin<br>heavy chain isoform 5A<br>OS=Mus musculus<br>GN=Kif5a PE=1 SV=3                                | 5.9E-08 | 30.2 | 2.50  | 3 (3 0 0 0 0) | Cytoplasm<br>perinuclear region.<br>Cytoplasm<br>cytoskeleton.                                                                                                                                                                             |
| Q9D019 | SYRC_MOUSE Arginyl-                                                                                                   | 1.8E-07 | 40.2 | 7.40  | 5 (5 0 0 0 0) | Cytoplasm.                                                                                                                                                                                                                                 |

|        |                                                                                                               |         |      |       |                 |                                                                                                    |
|--------|---------------------------------------------------------------------------------------------------------------|---------|------|-------|-----------------|----------------------------------------------------------------------------------------------------|
|        | tRNA synthetase,<br>cytoplasmic OS=Mus<br>musculus GN=Rars PE=2<br>SV=2                                       |         |      |       |                 |                                                                                                    |
| Q9WTR5 | CAD13_MOUSE<br>Cadherin-13 OS=Mus<br>musculus GN=Cdh13 PE=2<br>SV=1                                           | 7.2E-13 | 40.2 | 5.70  | 9 (9 0 0 0 0)   | Cell membrane;<br>Lipid-anchor &#x2013;<br>GPI-anchor.                                             |
| P62806 | H4_MOUSE Histone H4<br>OS=Mus musculus<br>GN=Hist1h4a PE=1 SV=2                                               | 1.3E-07 | 40.2 | 38.80 | 16 (16 0 0 0 0) | Nucleus.<br>Chromosome.                                                                            |
| P97311 | MCM6_MOUSE DNA<br>replication licensing factor<br>MCM6 OS=Mus musculus<br>GN=Mcm6 PE=1 SV=1                   | 1.7E-10 | 40.2 | 5.20  | 4 (4 0 0 0 0)   | Nucleus.                                                                                           |
| P70372 | ELAV1_MOUSE ELAV-<br>like protein 1 OS=Mus<br>musculus GN=Elavl1 PE=1<br>SV=1                                 | 4.5E-08 | 40.2 | 13.50 | 6 (6 0 0 0 0)   | Cytoplasm.                                                                                         |
| P46935 | NEDD4_MOUSE E3<br>ubiquitin-protein ligase<br>NEDD4 OS=Mus musculus<br>GN=Nedd4 PE=1 SV=3                     | 1.5E-08 | 40.2 | 6.30  | 4 (4 0 0 0 0)   | Cytoplasm. Cell<br>membrane;<br>Peripheral<br>membrane protein.                                    |
| P54071 | IDHP_MOUSE Isocitrate<br>dehydrogenase [NADP],<br>mitochondrial OS=Mus<br>musculus GN=Idh2 PE=1<br>SV=3       | 1.4E-11 | 40.2 | 9.70  | 5 (5 0 0 0 0)   | Mitochondrion.                                                                                     |
| Q07813 | BAX_MOUSE Apoptosis<br>regulator BAX OS=Mus<br>musculus GN=Bax PE=1<br>SV=1                                   | 3.6E-07 | 40.2 | 19.30 | 4 (4 0 0 0 0)   | Mitochondrion<br>outer membrane;<br>Single-pass<br>membrane protein.<br>Cytoplasm.<br>Cytoplasm.   |
| Q922B2 | SYDC_MOUSE Aspartyl-<br>tRNA synthetase,<br>cytoplasmic OS=Mus<br>musculus GN=Dars PE=2<br>SV=1               | 2.7E-07 | 40.2 | 11.00 | 5 (5 0 0 0 0)   | Cytoplasm.                                                                                         |
| Q9R0E1 | PLOD3_MOUSE<br>Procollagen-lysine,2-<br>oxoglutarate 5-dioxygenase<br>3 OS=Mus musculus<br>GN=Plod3 PE=1 SV=1 | 1.2E-07 | 30.2 | 4.90  | 3 (3 0 0 0 0)   | Rough<br>endoplasmic<br>reticulum<br>membrane;<br>Peripheral<br>membrane protein;<br>Luminal side. |
| Q8BG32 | PSD11_MOUSE 26S<br>proteasome non-ATPase<br>regulatory subunit 11<br>OS=Mus musculus<br>GN=Psm11 PE=1 SV=3    | 6.8E-07 | 40.2 | 11.40 | 4 (4 0 0 0 0)   | ND                                                                                                 |
| P62751 | RL23A_MOUSE 60S<br>ribosomal protein L23a<br>OS=Mus musculus<br>GN=Rpl23a PE=2 SV=1                           | 1.0E-09 | 40.2 | 18.60 | 4 (4 0 0 0 0)   | ND                                                                                                 |

|        |                                                                                                             |         |      |       |               |                                                                                                      |
|--------|-------------------------------------------------------------------------------------------------------------|---------|------|-------|---------------|------------------------------------------------------------------------------------------------------|
| P11087 | CO1A1_MOUSE Collagen alpha-1(I) chain OS=Mus musculus GN=Col1a1 PE=1 SV=4                                   | 5.3E-10 | 40.2 | 3.50  | 4 (4 0 0 0 0) | Secreted $\hat{\epsilon}^{\circ}$ extracellular space $\hat{\epsilon}^{\circ}$ extracellular matrix. |
| O08532 | CA2D1_MOUSE Voltage-dependent calcium channel subunit alpha-2/delta-1 OS=Mus musculus GN=Cacna2d1 PE=1 SV=1 | 4.4E-07 | 40.2 | 4.20  | 4 (4 0 0 0 0) | Membrane; Single-pass type I membrane protein.                                                       |
| Q91VR5 | DDX1_MOUSE ATP-dependent RNA helicase DDX1 OS=Mus musculus GN=Ddx1 PE=2 SV=1                                | 7.6E-06 | 30.2 | 5.40  | 3 (3 0 0 0 0) | Nucleus. Cytoplasm. Cytoplasmic granule.                                                             |
| Q80TS3 | LPHN3_MOUSE Latrophilin-3 OS=Mus musculus GN=Lphn3 PE=1 SV=3                                                | 1.5E-08 | 40.2 | 3.20  | 5 (5 0 0 0 0) | Cell membrane; Multi-pass membrane protein.                                                          |
| Q61074 | PPM1G_MOUSE Protein phosphatase 1G OS=Mus musculus GN=Ppm1g PE=2 SV=3                                       | 1.1E-06 | 40.2 | 8.70  | 4 (4 0 0 0 0) | Nucleus.                                                                                             |
| Q8BJ71 | NUP93_MOUSE Nuclear pore complex protein Nup93 OS=Mus musculus GN=Nup93 PE=2 SV=1                           | 7.0E-07 | 30.2 | 4.00  | 3 (3 0 0 0 0) | Nucleus $\hat{\epsilon}^{\circ}$ nuclear pore complex.                                               |
| P12970 | RL7A_MOUSE 60S ribosomal protein L7a OS=Mus musculus GN=Rpl7a PE=2 SV=2                                     | 2.8E-08 | 40.2 | 16.20 | 6 (6 0 0 0 0) | ND                                                                                                   |
| P97807 | FUMH_MOUSE Fumarate hydratase, mitochondrial OS=Mus musculus GN=Fh PE=1 SV=2                                | 4.5E-07 | 30.2 | 7.10  | 3 (3 0 0 0 0) | Mitochondrion. Cytoplasm.                                                                            |
| Q61171 | PRDX2_MOUSE Peroxiredoxin-2 OS=Mus musculus GN=Prdx2 PE=1 SV=3                                              | 1.0E-07 | 40.2 | 23.20 | 5 (5 0 0 0 0) | Cytoplasm.                                                                                           |
| Q9CVB6 | ARPC2_MOUSE Actin-related protein 2/3 complex subunit 2 OS=Mus musculus GN=Arpc2 PE=1 SV=3                  | 4.1E-09 | 30.2 | 11.70 | 3 (3 0 0 0 0) | Cytoplasm $\hat{\epsilon}^{\circ}$ cytoskeleton. Cell projection.                                    |
| Q9JKR6 | HYOU1_MOUSE Hypoxia up-regulated protein 1 OS=Mus musculus GN=Hyou1 PE=1 SV=1                               | 1.3E-07 | 40.2 | 4.80  | 4 (4 0 0 0 0) | Endoplasmic reticulum lumen.                                                                         |
| P18572 | BASI_MOUSE Basigin OS=Mus musculus GN=Bsg PE=1 SV=2                                                         | 3.6E-06 | 40.2 | 10.30 | 8 (8 0 0 0 0) | Cell membrane; Single-pass type I membrane protein. Melanosome.                                      |
| Q922Q8 | LRC59_MOUSE Leucine-rich repeat-containing protein 59 OS=Mus musculus GN=Lrrc59 PE=2 SV=1                   | 2.6E-07 | 30.2 | 13.00 | 3 (3 0 0 0 0) | Microsome membrane; Single-pass type II membrane protein. Endoplasmic                                |

|        |                                                                                                            |         |      |       |                 |                                                                                    |
|--------|------------------------------------------------------------------------------------------------------------|---------|------|-------|-----------------|------------------------------------------------------------------------------------|
|        |                                                                                                            |         |      |       |                 | reticulum membrane; Single-pass type II membrane protein.                          |
| Q62059 | CSPG2_MOUSE Versican core protein OS=Mus musculus GN=Vcan PE=1 SV=2                                        | 1.0E-08 | 30.2 | 0.90  | 5 (5 0 0 0 0)   | Secreted $\hat{\hat{e}}$ extracellular space $\hat{\hat{e}}$ extracellular matrix. |
| P53690 | MMP14_MOUSE Matrix metalloproteinase-14 OS=Mus musculus GN=Mmp14 PE=2 SV=2                                 | 4.0E-08 | 40.2 | 7.00  | 7 (7 0 0 0 0)   | Membrane; Single-pass type I membrane protein; Extracellular side. Melanosome.     |
| Q61490 | CD166_MOUSE CD166 antigen OS=Mus musculus GN=Alcam PE=1 SV=3                                               | 1.1E-07 | 30.2 | 4.30  | 7 (7 0 0 0 0)   | Membrane; Single-pass type I membrane protein.                                     |
| P62918 | RL8_MOUSE 60S ribosomal protein L8 OS=Mus musculus GN=Rpl8 PE=2 SV=2                                       | 4.8E-07 | 40.2 | 12.50 | 8 (8 0 0 0 0)   | Cytoplasm.                                                                         |
| Q3V3R1 | C1TM_MOUSE Monofunctional C1-tetrahydrofolate synthase, mitochondrial OS=Mus musculus GN=Mthfd11 PE=1 SV=2 | 2.1E-09 | 40.1 | 3.60  | 5 (5 0 0 0 0)   | Mitochondrion.                                                                     |
| O35295 | PURB_MOUSE Transcriptional activator protein Pur-beta OS=Mus musculus GN=Purb PE=1 SV=3                    | 6.1E-08 | 30.2 | 11.10 | 3 (3 0 0 0 0)   | Nucleus.                                                                           |
| P49717 | MCM4_MOUSE DNA replication licensing factor MCM4 OS=Mus musculus GN=Mcm4 PE=2 SV=1                         | 2.0E-08 | 30.2 | 4.20  | 3 (3 0 0 0 0)   | Nucleus.                                                                           |
| P62281 | RS11_MOUSE 40S ribosomal protein S11 OS=Mus musculus GN=Rps11 PE=2 SV=3                                    | 5.9E-07 | 40.1 | 17.70 | 4 (4 0 0 0 0)   | ND                                                                                 |
| Q99K51 | PLST_MOUSE Plastin-3 OS=Mus musculus GN=Pls3 PE=1 SV=3                                                     | 6.0E-05 | 40.1 | 7.80  | 4 (4 0 0 0 0)   | Cytoplasm.                                                                         |
| Q922F4 | TBB6_MOUSE Tubulin beta-6 chain OS=Mus musculus GN=Tubb6 PE=1 SV=1                                         | 3.7E-11 | 36.3 | 9.40  | 6 (5 0 1 0 0)   | Cytoplasm $\hat{\hat{e}}$ cytoskeleton.                                            |
| P12382 | K6PL_MOUSE 6-phosphofructokinase, liver type OS=Mus musculus GN=Pfk1 PE=1 SV=3                             | 8.9E-14 | 30.3 | 3.60  | 3 (3 0 0 0 0)   | ND                                                                                 |
| P99024 | TBB5_MOUSE Tubulin beta-5 chain OS=Mus musculus GN=Tubb5 PE=1 SV=1                                         | 1.0E-10 | 30.3 | 9.90  | 32 (32 0 0 0 0) | Cytoplasm $\hat{\hat{e}}$ cytoskeleton.                                            |

|        |                                                                                                          |         |      |       |               |                                                              |
|--------|----------------------------------------------------------------------------------------------------------|---------|------|-------|---------------|--------------------------------------------------------------|
| Q61768 | KINH_MOUSE Kinesin-1 heavy chain OS=Mus musculus GN=Kif5b PE=1 SV=2                                      | 7.0E-10 | 30.3 | 4.40  | 3 (3 0 0 0 0) | Cytoplasm &° cytoskeleton.                                   |
| O08749 | DLDH_MOUSE Dihydrolipoyl dehydrogenase, mitochondrial OS=Mus musculus GN=Dld PE=1 SV=2                   | 5.6E-10 | 30.3 | 6.50  | 3 (3 0 0 0 0) | Mitochondrion matrix.                                        |
| P07091 | S10A4_MOUSE Protein S100-A4 OS=Mus musculus GN=S100a4 PE=1 SV=1                                          | 2.3E-06 | 30.1 | 17.80 | 3 (3 0 0 0 0) | ND                                                           |
| Q9DCD0 | 6PGD_MOUSE 6-phosphogluconate dehydrogenase, decarboxylating OS=Mus musculus GN=Pgd PE=2 SV=3            | 1.9E-12 | 30.2 | 7.70  | 3 (3 0 0 0 0) | Cytoplasm.                                                   |
| P59999 | ARPC4_MOUSE Actin-related protein 2/3 complex subunit 4 OS=Mus musculus GN=Arpc4 PE=1 SV=3               | 5.5E-06 | 30.1 | 16.70 | 5 (5 0 0 0 0) | Cytoplasm &° cytoskeleton. Cell projection.                  |
| Q9CY58 | PAIRB_MOUSE Plasminogen activator inhibitor 1 RNA-binding protein OS=Mus musculus GN=Serbp1 PE=1 SV=2    | 1.9E-09 | 30.2 | 9.60  | 5 (5 0 0 0 0) | Cytoplasm. Nucleus. Cytoplasm &° perinuclear region.         |
| Q99P72 | RTN4_MOUSE Reticulon-4 OS=Mus musculus GN=Rtn4 PE=1 SV=2                                                 | 2.0E-11 | 30.2 | 4.50  | 4 (4 0 0 0 0) | Endoplasmic reticulum membrane; Multi-pass membrane protein. |
| Q61390 | TCPW_MOUSE T-complex protein 1 subunit zeta-2 OS=Mus musculus GN=Cct6b PE=2 SV=4                         | 8.1E-09 | 30.1 | 4.30  | 3 (3 0 0 0 0) | Cytoplasm.                                                   |
| Q8BKC5 | IPO5_MOUSE Importin-5 OS=Mus musculus GN=Ipo5 PE=1 SV=3                                                  | 9.6E-06 | 30.1 | 2.60  | 3 (3 0 0 0 0) | Cytoplasm. Nucleus.                                          |
| O35326 | SFRS5_MOUSE Splicing factor, arginine/serine-rich 5 OS=Mus musculus GN=Sfrs5 PE=1 SV=1                   | 4.7E-09 | 30.2 | 14.80 | 3 (3 0 0 0 0) | Nucleus.                                                     |
| Q6NVF9 | CPSF6_MOUSE Cleavage and polyadenylation specificity factor subunit 6 OS=Mus musculus GN=Cpsf6 PE=1 SV=1 | 2.9E-10 | 30.2 | 5.10  | 3 (3 0 0 0 0) | Nucleus.                                                     |
| Q921F2 | TADBP_MOUSE TAR DNA-binding protein 43 OS=Mus musculus GN=Tardbp PE=1 SV=1                               | 3.3E-15 | 30.2 | 9.20  | 4 (4 0 0 0 0) | Nucleus.                                                     |



|        |                                                                                                    |         |      |       |               |                                                                                                        |
|--------|----------------------------------------------------------------------------------------------------|---------|------|-------|---------------|--------------------------------------------------------------------------------------------------------|
| Q60932 | VDAC1_MOUSE Voltage-dependent anion-selective channel protein 1 OS=Mus musculus GN=Vdac1 PE=1 SV=3 | 4.4E-06 | 26.1 | 10.50 | 4 (2 2 0 0 0) | Mitochondrion outer membrane; Multi-pass membrane protein. Cell membrane; Multi-pass membrane protein. |
| Q9WUM4 | COR1C_MOUSE Coronin-1C OS=Mus musculus GN=Coro1c PE=1 SV=2                                         | 4.3E-08 | 30.2 | 8.20  | 4 (4 0 0 0 0) | ND                                                                                                     |
| Q6P542 | ABCF1_MOUSE ATP-binding cassette sub-family F member 1 OS=Mus musculus GN=Abcf1 PE=1 SV=1          | 1.7E-08 | 20.3 | 3.50  | 2 (2 0 0 0 0) | Cytoplasm. Nucleus $\hat{e}$ nucleoplasm. Nucleus envelope.                                            |
| Q99PT1 | DIR1_MOUSE Rho GDP-dissociation inhibitor 1 OS=Mus musculus GN=Arhgdia PE=1 SV=3                   | 1.0E-11 | 30.2 | 23.50 | 3 (3 0 0 0 0) | Cytoplasm.                                                                                             |
| Q99MR6 | SRRT_MOUSE Serrate RNA effector molecule homolog OS=Mus musculus GN=Srrt PE=1 SV=1                 | 1.8E-09 | 30.2 | 3.80  | 3 (3 0 0 0 0) | Nucleus $\hat{e}$ nucleoplasm. Cytoplasm.                                                              |
| Q5SWU9 | ACACA_MOUSE Acetyl-CoA carboxylase 1 OS=Mus musculus GN=Acaca PE=1 SV=1                            | 3.9E-11 | 30.2 | 1.60  | 3 (3 0 0 0 0) | Cytoplasm.                                                                                             |
| P54754 | EPHB3_MOUSE Ephrin type-B receptor 3 OS=Mus musculus GN=Ephb3 PE=2 SV=1                            | 4.0E-11 | 20.2 | 2.60  | 2 (2 0 0 0 0) | Membrane; Single-pass type I membrane protein.                                                         |
| O08573 | LEG9_MOUSE Galectin-9 OS=Mus musculus GN=Lgals9 PE=1 SV=1                                          | 1.9E-11 | 30.2 | 9.90  | 4 (4 0 0 0 0) | Cytoplasm. Secreted.                                                                                   |
| Q8BMS1 | ECHA_MOUSE Trifunctional enzyme subunit alpha, mitochondrial OS=Mus musculus GN=Hadha PE=1 SV=1    | 3.7E-11 | 20.2 | 3.30  | 2 (2 0 0 0 0) | Mitochondrion matrix.                                                                                  |
| Q08943 | SSRP1_MOUSE FACT complex subunit SSRP1 OS=Mus musculus GN=Ssrp1 PE=1 SV=2                          | 1.3E-10 | 30.2 | 5.80  | 5 (5 0 0 0 0) | Nucleus. Chromosome.                                                                                   |
| P35979 | RL12_MOUSE 60S ribosomal protein L12 OS=Mus musculus GN=Rpl12 PE=1 SV=2                            | 8.6E-09 | 30.2 | 24.20 | 3 (3 0 0 0 0) | ND                                                                                                     |
| O09167 | RL21_MOUSE 60S ribosomal protein L21 OS=Mus musculus GN=Rpl21 PE=2 SV=3                            | 4.0E-10 | 20.2 | 16.30 | 3 (3 0 0 0 0) | ND                                                                                                     |
| Q8BNJ2 | ATS4_MOUSE A disintegrin and                                                                       | 2.2E-08 | 20.2 | 4.00  | 2 (2 0 0 0 0) | Secreted $\hat{e}$ extracellular space                                                                 |

|        |                                                                                                                          |         |      |       |                 |                                                                                                 |
|--------|--------------------------------------------------------------------------------------------------------------------------|---------|------|-------|-----------------|-------------------------------------------------------------------------------------------------|
|        | metalloproteinase with thrombospondin motifs 4<br>OS=Mus musculus<br>GN=Adamts4 PE=2 SV=2                                |         |      |       |                 | â€° extracellular matrix.                                                                       |
| P47753 | CAZA1_MOUSE F-actin-capping protein subunit alpha-1 OS=Mus musculus<br>GN=Capza1 PE=1 SV=4                               | 1.6E-09 | 30.2 | 15.00 | 5 (5 0 0 0 0)   | Cytoplasm â€° cytoskeleton.                                                                     |
| O35375 | NRP2_MOUSE Neuropilin-2 OS=Mus musculus<br>GN=Nrp2 PE=2 SV=1                                                             | 2.3E-08 | 20.2 | 2.80  | 3 (3 0 0 0 0)   | Membrane; Single-pass type I membrane protein.                                                  |
| P14206 | RSSA_MOUSE 40S ribosomal protein SA OS=Mus musculus<br>GN=Rpsa PE=1 SV=4                                                 | 9.6E-13 | 30.2 | 12.90 | 4 (4 0 0 0 0)   | Cell membrane. Cytoplasm. Nucleus.                                                              |
| Q6IRU2 | TPM4_MOUSE Tropomyosin alpha-4 chain OS=Mus musculus<br>GN=Tpm4 PE=2 SV=3                                                | 1.8E-08 | 30.2 | 9.30  | 4 (4 0 0 0 0)   | Cytoplasm â€° cytoskeleton.                                                                     |
| O55222 | ILK_MOUSE Integrin-linked protein kinase OS=Mus musculus<br>GN=Ilk PE=1 SV=2                                             | 2.1E-08 | 30.2 | 8.60  | 3 (3 0 0 0 0)   | Cell junction â€° focal adhesion. Cell membrane; Peripheral membrane protein; Cytoplasmic side. |
| P11679 | K2C8_MOUSE Keratin, type II cytoskeletal 8 OS=Mus musculus<br>GN=Krt8 PE=1 SV=4                                          | 1.0E-10 | 20.2 | 2.90  | 25 (25 0 0 0 0) | Cytoplasm. Nucleus â€° nucleoplasm. Nucleus matrix.                                             |
| Q9R0E2 | PLOD1_MOUSE Procollagen-lysine,2-oxoglutarate 5-dioxygenase 1 OS=Mus musculus<br>GN=Plod1 PE=1 SV=1                      | 1.7E-07 | 20.2 | 3.70  | 2 (2 0 0 0 0)   | Rough endoplasmic reticulum membrane; Peripheral membrane protein; Luminal side.                |
| Q8K2B3 | DHSA_MOUSE Succinate dehydrogenase [ubiquinone] flavoprotein subunit, mitochondrial OS=Mus musculus<br>GN=Sdha PE=1 SV=1 | 6.0E-08 | 30.2 | 5.00  | 3 (3 0 0 0 0)   | Mitochondrion inner membrane; Peripheral membrane protein; Matrix side.                         |
| P97370 | AT1B3_MOUSE Sodium/potassium-transporting ATPase subunit beta-3 OS=Mus musculus<br>GN=Atp1b3 PE=1 SV=1                   | 4.1E-09 | 30.2 | 7.90  | 4 (4 0 0 0 0)   | Membrane; Single-pass type II membrane protein. Melanosome.                                     |
| Q9JIX8 | ACINU_MOUSE Apoptotic chromatin condensation inducer in the nucleus OS=Mus musculus<br>GN=Acin1 PE=1 SV=2                | 2.0E-11 | 30.2 | 2.80  | 4 (4 0 0 0 0)   | Nucleus.                                                                                        |
| O08529 | CAN2_MOUSE Calpain-2                                                                                                     | 1.4E-09 | 30.2 | 3.40  | 3 (3 0 0 0 0)   | Cytoplasm. Cell                                                                                 |

|        |                                                                                                                                |         |      |       |               |                                                                 |
|--------|--------------------------------------------------------------------------------------------------------------------------------|---------|------|-------|---------------|-----------------------------------------------------------------|
|        | catalytic subunit OS=Mus musculus GN=Capn2 PE=2 SV=4                                                                           |         |      |       |               | membrane.                                                       |
| Q9Z1W8 | AT12A_MOUSE Potassium-transporting ATPase alpha chain 2 OS=Mus musculus GN=Atp12a PE=1 SV=2                                    | 1.7E-11 | 20.2 | 1.30  | 3 (3 0 0 0 0) | Membrane; Multi-pass membrane protein.                          |
| O70475 | UGDH_MOUSE UDP-glucose 6-dehydrogenase OS=Mus musculus GN=Ugdh PE=1 SV=1                                                       | 4.3E-10 | 30.2 | 7.30  | 3 (3 0 0 0 0) | ND                                                              |
| Q6R0H7 | GNAS1_MOUSE Guanine nucleotide-binding protein G(s) subunit alpha isoforms XLas OS=Mus musculus GN=Gnas PE=2 SV=1              | 6.7E-06 | 30.2 | 3.40  | 3 (3 0 0 0 0) | Cell membrane; Peripheral membrane protein.                     |
| Q569Z6 | TR150_MOUSE Thyroid hormone receptor-associated protein 3 OS=Mus musculus GN=Thrap3 PE=1 SV=1                                  | 1.4E-08 | 30.2 | 3.20  | 3 (3 0 0 0 0) | Nucleus.                                                        |
| Q9CPW4 | ARPC5_MOUSE Actin-related protein 2/3 complex subunit 5 OS=Mus musculus GN=Arpc5 PE=2 SV=3                                     | 1.8E-06 | 20.2 | 16.60 | 2 (2 0 0 0 0) | Cytoplasm &° cytoskeleton. Cell projection.                     |
| P26516 | PSD7_MOUSE 26S proteasome non-ATPase regulatory subunit 7 OS=Mus musculus GN=Psm7 PE=1 SV=2                                    | 2.4E-09 | 30.2 | 10.60 | 3 (3 0 0 0 0) | ND                                                              |
| Q9R1C7 | PR40A_MOUSE Pre-mRNA-processing factor 40 homolog A OS=Mus musculus GN=Prpf40a PE=1 SV=1                                       | 3.1E-05 | 30.2 | 4.20  | 3 (3 0 0 0 0) | Nucleus speckle. Nucleus matrix.                                |
| P62827 | RAN_MOUSE GTP-binding nuclear protein Ran OS=Mus musculus GN=Ran PE=1 SV=3                                                     | 2.2E-08 | 30.2 | 10.60 | 3 (3 0 0 0 0) | Nucleus. Cytoplasm. Melanosome.                                 |
| P08003 | PDIA4_MOUSE Protein disulfide-isomerase A4 OS=Mus musculus GN=Pdia4 PE=1 SV=2                                                  | 1.9E-08 | 30.2 | 5.00  | 4 (4 0 0 0 0) | Endoplasmic reticulum lumen. Melanosome.                        |
| Q9CRB9 | CHCH3_MOUSE Coiled-coil-helix-coiled-coil-helix domain-containing protein 3, mitochondrial OS=Mus musculus GN=Chchd3 PE=1 SV=1 | 7.2E-06 | 30.2 | 12.80 | 3 (3 0 0 0 0) | Mitochondrion inner membrane; Lipid-anchor; Intermembrane side. |
| Q9D0R2 | SYTC_MOUSE Threonyl-tRNA synthetase, cytoplasmic OS=Mus musculus GN=Tars PE=1                                                  | 2.2E-06 | 30.2 | 4.70  | 4 (4 0 0 0 0) | Cytoplasm.                                                      |

*A novel role of mitochondria in muscle injury*

|        |                                                                                                    |         |      |       |               |                                                                                                                                                |
|--------|----------------------------------------------------------------------------------------------------|---------|------|-------|---------------|------------------------------------------------------------------------------------------------------------------------------------------------|
|        | SV=2                                                                                               |         |      |       |               |                                                                                                                                                |
| Q8BL97 | SFRS7_MOUSE Splicing factor, arginine/serine-rich 7 OS=Mus musculus GN=Sfrs7 PE=1 SV=1             | 4.8E-10 | 30.2 | 18.40 | 3 (3 0 0 0 0) | Nucleus.                                                                                                                                       |
| Q6NZJ6 | IF4G1_MOUSE Eukaryotic translation initiation factor 4 gamma 1 OS=Mus musculus GN=Eif4g1 PE=1 SV=1 | 1.0E-11 | 30.2 | 3.70  | 3 (3 0 0 0 0) | ND                                                                                                                                             |
| Q62181 | SEM3C_MOUSE Semaphorin-3C OS=Mus musculus GN=Sema3c PE=2 SV=1                                      | 2.3E-06 | 20.2 | 2.90  | 2 (2 0 0 0 0) | Secreted.                                                                                                                                      |
| Q61937 | NPM_MOUSE Nucleophosmin OS=Mus musculus GN=Npm1 PE=1 SV=1                                          | 1.7E-05 | 20.2 | 7.90  | 3 (3 0 0 0 0) | Nucleus $\hat{\epsilon}$ nucleolus. Nucleus $\hat{\epsilon}$ nucleoplasm. Cytoplasm $\hat{\epsilon}$ cytoskeleton $\hat{\epsilon}$ centrosome. |
| Q3TEA8 | HP1B3_MOUSE Heterochromatin protein 1-binding protein 3 OS=Mus musculus GN=Hp1bp3 PE=1 SV=1        | 4.9E-07 | 30.2 | 6.00  | 3 (3 0 0 0 0) | Nucleus. Chromosome.                                                                                                                           |
| P46460 | NSF_MOUSE Vesicle-fusing ATPase OS=Mus musculus GN=Nsf PE=1 SV=2                                   | 2.0E-07 | 20.2 | 3.20  | 2 (2 0 0 0 0) | Cytoplasm.                                                                                                                                     |
| Q5FWI3 | TMEM2_MOUSE Transmembrane protein 2 OS=Mus musculus GN=Tmem2 PE=1 SV=1                             | 3.9E-09 | 30.2 | 2.70  | 3 (3 0 0 0 0) | Membrane; Single-pass membrane protein.                                                                                                        |
| P09411 | PGK1_MOUSE Phosphoglycerate kinase 1 OS=Mus musculus GN=Pgk1 PE=1 SV=4                             | 9.1E-11 | 20.2 | 7.20  | 2 (2 0 0 0 0) | Cytoplasm.                                                                                                                                     |
| Q8BK67 | RCC2_MOUSE Protein RCC2 OS=Mus musculus GN=Rcc2 PE=2 SV=1                                          | 2.1E-08 | 30.2 | 5.40  | 3 (3 0 0 0 0) | Nucleus $\hat{\epsilon}$ nucleolus. Chromosome $\hat{\epsilon}$ centromere. Cytoplasm $\hat{\epsilon}$ cytoskeleton $\hat{\epsilon}$ spindle.  |
| Q8BJS4 | UN84B_MOUSE Protein unc-84 homolog B OS=Mus musculus GN=Unc84b PE=1 SV=2                           | 2.0E-07 | 20.2 | 3.40  | 2 (2 0 0 0 0) | Nucleus inner membrane; Single-pass type II membrane protein. Endosome membrane; Single-pass type II membrane protein.                         |
| Q9D2G2 | ODO2_MOUSE Dihydrolipoyllysine-residue succinyltransferase                                         | 3.1E-08 | 30.2 | 5.10  | 3 (3 0 0 0 0) | Mitochondrion.                                                                                                                                 |

|        |                                                                                                              |         |      |       |               |                                                                                                   |
|--------|--------------------------------------------------------------------------------------------------------------|---------|------|-------|---------------|---------------------------------------------------------------------------------------------------|
|        | component of 2-oxoglutarate dehydrogenase complex, mitochondrial<br>OS=Mus musculus<br>GN=Dlst PE=1 SV=1     |         |      |       |               |                                                                                                   |
| P27659 | RL3_MOUSE 60S ribosomal protein L3<br>OS=Mus musculus<br>GN=Rpl3 PE=2 SV=2                                   | 3.3E-07 | 20.2 | 6.20  | 7 (7 0 0 0 0) | Cytoplasm.                                                                                        |
| P35278 | RAB5C_MOUSE Ras-related protein Rab-5C<br>OS=Mus musculus<br>GN=Rab5c PE=1 SV=2                              | 5.7E-07 | 20.2 | 11.10 | 3 (3 0 0 0 0) | Cell membrane; Lipid-anchor; Cytoplasmic side. Early endosome membrane; Lipid-anchor. Melanosome. |
| P68433 | H31_MOUSE Histone H3.1<br>OS=Mus musculus<br>GN=Hist1h3a PE=1 SV=2                                           | 7.5E-08 | 30.2 | 17.60 | 7 (7 0 0 0 0) | Nucleus. Chromosome.                                                                              |
| Q91VI7 | RINI_MOUSE Ribonuclease inhibitor<br>OS=Mus musculus<br>GN=Rnh1 PE=2 SV=1                                    | 3.8E-08 | 20.2 | 4.80  | 3 (3 0 0 0 0) | Cytoplasm.                                                                                        |
| Q8N9S3 | AHSA2_MOUSE Activator of 90 kDa heat shock protein ATPase homolog 2<br>OS=Mus musculus<br>GN=Ahsa2 PE=2 SV=2 | 1.8E-07 | 20.2 | 6.00  | 2 (2 0 0 0 0) | ND                                                                                                |
| Q9R0U0 | SF13A_MOUSE Splicing factor, arginine/serine-rich 13A<br>OS=Mus musculus<br>GN=Sfrs13a PE=1 SV=2             | 1.0E-04 | 30.2 | 13.70 | 4 (4 0 0 0 0) | Nucleus speckle.                                                                                  |
| P59222 | SREC2_MOUSE Scavenger receptor class F member 2<br>OS=Mus musculus GN=Scarf2 PE=1 SV=1                       | 1.0E-10 | 30.2 | 4.20  | 3 (3 0 0 0 0) | Membrane; Single-pass type I membrane protein.                                                    |
| Q61696 | HS71A_MOUSE Heat shock 70 kDa protein 1A<br>OS=Mus musculus<br>GN=Hspa1a PE=1 SV=2                           | 1.6E-10 | 30.2 | 4.80  | 7 (7 0 0 0 0) | Cytoplasm.                                                                                        |
| O70133 | DHX9_MOUSE ATP-dependent RNA helicase A<br>OS=Mus musculus<br>GN=Dhx9 PE=1 SV=2                              | 2.9E-09 | 30.2 | 2.40  | 3 (3 0 0 0 0) | Nucleus & nucleolus. Cytoplasm.                                                                   |
| Q8R4U6 | TOP1M_MOUSE DNA topoisomerase I, mitochondrial<br>OS=Mus musculus GN=Top1mt PE=2 SV=1                        | 1.8E-09 | 20.2 | 2.00  | 2 (2 0 0 0 0) | Mitochondrion.                                                                                    |
| Q80TF3 | PCD19_MOUSE Protocadherin-19<br>OS=Mus musculus GN=Pcdh19 PE=2 SV=2                                          | 3.8E-05 | 30.2 | 3.70  | 3 (3 0 0 0 0) | Cell membrane; Single-pass type I membrane protein.                                               |
| Q91VC3 | IF4A3_MOUSE Eukaryotic                                                                                       | 3.7E-05 | 20.2 | 5.10  | 2 (2 0 0 0 0) | Nucleus. Nucleus                                                                                  |

*A novel role of mitochondria in muscle injury*

|        |                                                                                                                         |         |      |       |               |                                                                                                                                                                                                                              |
|--------|-------------------------------------------------------------------------------------------------------------------------|---------|------|-------|---------------|------------------------------------------------------------------------------------------------------------------------------------------------------------------------------------------------------------------------------|
|        | initiation factor 4A-III<br>OS=Mus musculus<br>GN=Eif4a3 PE=2 SV=3                                                      |         |      |       |               | speckle.<br>Cytoplasm.                                                                                                                                                                                                       |
| Q9JL15 | LEG8_MOUSE Galectin-8<br>OS=Mus musculus<br>GN=Lgals8 PE=2 SV=1                                                         | 2.2E-09 | 30.2 | 10.80 | 3 (3 0 0 0 0) | Cytoplasm.                                                                                                                                                                                                                   |
| P47757 | CAPZB_MOUSE F-actin-<br>capping protein subunit<br>beta OS=Mus musculus<br>GN=Capzb PE=1 SV=3                           | 2.7E-08 | 30.2 | 12.30 | 5 (5 0 0 0 0) | Cytoplasm &°<br>cytoskeleton.                                                                                                                                                                                                |
| O55029 | COPB2_MOUSE Coatomer<br>subunit beta' OS=Mus<br>musculus GN=Copb2 PE=2<br>SV=2                                          | 4.2E-06 | 20.2 | 2.10  | 2 (2 0 0 0 0) | Cytoplasm. Golgi<br>apparatus<br>membrane;<br>Peripheral<br>membrane protein;<br>Cytoplasmic side.<br>Cytoplasmic<br>vesicle &° COPI-<br>coated vesicle<br>membrane;<br>Peripheral<br>membrane protein;<br>Cytoplasmic side. |
| Q8VHE0 | SEC63_MOUSE<br>Translocation protein<br>SEC63 homolog OS=Mus<br>musculus GN=Sec63 PE=1<br>SV=3                          | 4.2E-05 | 30.2 | 4.30  | 3 (3 0 0 0 0) | Endoplasmic<br>reticulum<br>membrane; Multi-<br>pass membrane<br>protein.                                                                                                                                                    |
| Q8BFR5 | EFTU_MOUSE Elongation<br>factor Tu, mitochondrial<br>OS=Mus musculus<br>GN=Tufm PE=1 SV=1                               | 8.1E-08 | 30.2 | 9.30  | 4 (4 0 0 0 0) | Mitochondrion.                                                                                                                                                                                                               |
| Q32MD9 | CDON_MOUSE Cell<br>adhesion molecule-<br>related/down-regulated by<br>oncogenes OS=Mus<br>musculus GN=Cdon PE=1<br>SV=1 | 6.3E-07 | 30.2 | 2.90  | 3 (3 0 0 0 0) | Membrane; Single-<br>pass membrane<br>protein.                                                                                                                                                                               |
| Q07079 | IBP5_MOUSE Insulin-like<br>growth factor-binding<br>protein 5 OS=Mus<br>musculus GN=Igfbp5 PE=1<br>SV=1                 | 4.5E-09 | 30.2 | 8.10  | 5 (5 0 0 0 0) | Secreted.                                                                                                                                                                                                                    |
| Q7TPV4 | MBB1A_MOUSE Myb-<br>binding protein 1A<br>OS=Mus musculus<br>GN=Mybbp1a PE=1 SV=2                                       | 1.1E-07 | 20.2 | 2.20  | 2 (2 0 0 0 0) | Nucleus &°<br>nucleolus.<br>Cytoplasm.                                                                                                                                                                                       |
| Q61001 | LAMA5_MOUSE Laminin<br>subunit alpha-5 OS=Mus<br>musculus GN=Lama5 PE=1<br>SV=3                                         | 5.3E-07 | 20.2 | 0.60  | 3 (3 0 0 0 0) | Secreted &°<br>extracellular space<br>&° extracellular<br>matrix &°<br>basement<br>membrane.                                                                                                                                 |
| Q9CZT5 | VASN_MOUSE Vasorin<br>OS=Mus musculus                                                                                   | 3.4E-08 | 30.2 | 5.60  | 4 (4 0 0 0 0) | Membrane; Single-<br>pass type I                                                                                                                                                                                             |

|        |                                                                                                       |         |      |       |               |                                                                                                                                                   |
|--------|-------------------------------------------------------------------------------------------------------|---------|------|-------|---------------|---------------------------------------------------------------------------------------------------------------------------------------------------|
|        | GN=Vasn PE=2 SV=2                                                                                     |         |      |       |               | membrane protein.                                                                                                                                 |
| Q9CZM2 | RL15_MOUSE 60S ribosomal protein L15 OS=Mus musculus GN=Rpl15 PE=2 SV=4                               | 6.8E-09 | 30.2 | 4.40  | 3 (3 0 0 0 0) | ND                                                                                                                                                |
| Q9D1D4 | TMEDA_MOUSE Transmembrane emp24 domain-containing protein 10 OS=Mus musculus GN=Tmed10 PE=2 SV=1      | 3.1E-07 | 20.2 | 5.00  | 2 (2 0 0 0 0) | Golgi apparatus membrane; Single-pass type I membrane protein; Lumenal side. Melanosome.                                                          |
| P16460 | ASSY_MOUSE Argininosuccinate synthase OS=Mus musculus GN=Ass1 PE=1 SV=1                               | 3.5E-05 | 20.2 | 5.30  | 2 (2 0 0 0 0) | ND                                                                                                                                                |
| Q9D6Z1 | NOP56_MOUSE Nucleolar protein 56 OS=Mus musculus GN=Nop56 PE=1 SV=2                                   | 5.9E-10 | 30.2 | 6.20  | 3 (3 0 0 0 0) | Nucleus $\hat{e}^{\circ}$ nucleolus.                                                                                                              |
| Q3UMU9 | HDGR2_MOUSE Hepatoma-derived growth factor-related protein 2 OS=Mus musculus GN=Hdgfrp2 PE=1 SV=1     | 1.8E-07 | 30.2 | 6.00  | 3 (3 0 0 0 0) | ND                                                                                                                                                |
| O54724 | PTRF_MOUSE Polymerase I and transcript release factor OS=Mus musculus GN=Ptrf PE=1 SV=1               | 1.1E-05 | 30.2 | 5.60  | 3 (3 0 0 0 0) | Membrane $\hat{e}^{\circ}$ caveola. Cell membrane. Microsome. Endoplasmic reticulum. Cytoplasm $\hat{e}^{\circ}$ cytosol. Mitochondrion. Nucleus. |
| Q9WV55 | VAPA_MOUSE Vesicle-associated membrane protein-associated protein A OS=Mus musculus GN=Vapa PE=1 SV=2 | 1.0E-05 | 20.2 | 9.60  | 2 (2 0 0 0 0) | Endoplasmic reticulum membrane; Single-pass type IV membrane protein.                                                                             |
| P52795 | EFNB1_MOUSE Ephrin-B1 OS=Mus musculus GN=Efnb1 PE=1 SV=1                                              | 7.2E-08 | 30.2 | 14.20 | 3 (3 0 0 0 0) | Membrane; Single-pass type I membrane protein.                                                                                                    |
| Q9WVA4 | TAGL2_MOUSE Transgelin-2 OS=Mus musculus GN=Tagln2 PE=1 SV=4                                          | 1.4E-07 | 20.2 | 11.60 | 2 (2 0 0 0 0) | ND                                                                                                                                                |
| Q9DBV4 | MXRA8_MOUSE Matrix-remodeling-associated protein 8 OS=Mus musculus GN=Mxra8 PE=2 SV=1                 | 7.7E-07 | 30.2 | 7.20  | 3 (3 0 0 0 0) | Membrane; Single-pass type I membrane protein.                                                                                                    |
| P19253 | RL13A_MOUSE 60S ribosomal protein L13a OS=Mus musculus GN=Rpl13a PE=1 SV=4                            | 5.0E-07 | 30.2 | 10.30 | 3 (3 0 0 0 0) | ND                                                                                                                                                |

*A novel role of mitochondria in muscle injury*

|         |                                                                                                                                                                   |         |      |       |               |                                                                                                                                                       |
|---------|-------------------------------------------------------------------------------------------------------------------------------------------------------------------|---------|------|-------|---------------|-------------------------------------------------------------------------------------------------------------------------------------------------------|
| P16110  | LEG3_MOUSE Galectin-3<br>OS=Mus musculus<br>GN=Lgals3 PE=1 SV=3                                                                                                   | 1.5E-06 | 30.2 | 14.00 | 3 (3 0 0 0 0) | Cytoplasm.<br>Nucleus. Secreted.                                                                                                                      |
| Q9Z204  | HNRPC_MOUSE<br>Heterogeneous nuclear<br>ribonucleoproteins C1/C2<br>OS=Mus musculus<br>GN=Hnrnpc PE=1 SV=1                                                        | 2.0E-07 | 20.2 | 8.60  | 2 (2 0 0 0 0) | Nucleus.                                                                                                                                              |
| Q6Z WV7 | RL35_MOUSE 60S<br>ribosomal protein L35<br>OS=Mus musculus<br>GN=Rpl35 PE=2 SV=1                                                                                  | 1.3E-05 | 30.2 | 22.80 | 4 (4 0 0 0 0) | ND                                                                                                                                                    |
| Q9QYJ0  | DNJA2_MOUSE DnaJ<br>homolog subfamily A<br>member 2 OS=Mus<br>musculus GN=Dnaja2<br>PE=1 SV=1                                                                     | 5.4E-07 | 30.1 | 6.80  | 3 (3 0 0 0 0) | Membrane; Lipid-<br>anchor.                                                                                                                           |
| Q6GU68  | ISLR_MOUSE<br>Immunoglobulin<br>superfamily containing<br>leucine-rich repeat protein<br>OS=Mus musculus GN=Islr<br>PE=1 SV=1                                     | 2.3E-07 | 30.1 | 7.70  | 4 (4 0 0 0 0) | Secreted.                                                                                                                                             |
| Q01405  | SC23A_MOUSE Protein<br>transport protein Sec23A<br>OS=Mus musculus<br>GN=Sec23a PE=1 SV=2                                                                         | 1.5E-05 | 20.2 | 1.60  | 2 (2 0 0 0 0) | Smooth<br>endoplasmic<br>reticulum<br>membrane;<br>Peripheral<br>membrane protein.<br>Golgi apparatus<br>membrane;<br>Peripheral<br>membrane protein. |
| P97434  | MPRIP_MOUSE Myosin<br>phosphatase Rho-<br>interacting protein OS=Mus<br>musculus GN=Mrip PE=1<br>SV=2                                                             | 2.1E-06 | 20.2 | 2.50  | 2 (2 0 0 0 0) | Cytoplasm $\hat{c}$<br>cytoskeleton.                                                                                                                  |
| Q91ZW3  | SMCA5_MOUSE<br>SWI/SNF-related matrix-<br>associated actin-dependent<br>regulator of chromatin<br>subfamily A member 5<br>OS=Mus musculus<br>GN=Smarca5 PE=1 SV=1 | 8.8E-06 | 30.1 | 2.70  | 4 (4 0 0 0 0) | Nucleus.                                                                                                                                              |
| Q61990  | PCBP2_MOUSE Poly(rC)-<br>binding protein 2 OS=Mus<br>musculus GN=Pcbp2 PE=1<br>SV=1                                                                               | 2.6E-07 | 20.2 | 6.60  | 6 (6 0 0 0 0) | Nucleus.<br>Cytoplasm.                                                                                                                                |
| P82347  | SGCD_MOUSE Delta-<br>sarcoglycan OS=Mus<br>musculus GN=Sgcd PE=1<br>SV=1                                                                                          | 3.6E-07 | 20.2 | 7.30  | 4 (4 0 0 0 0) | Cell membrane $\hat{c}$<br>sarcolemma;<br>Single-pass type II<br>membrane protein.<br>Cytoplasm $\hat{c}$<br>cytoskeleton.                            |



*A novel role of mitochondria in muscle injury*

|        |                                                                                                     |         |      |       |               |                                                                                                         |
|--------|-----------------------------------------------------------------------------------------------------|---------|------|-------|---------------|---------------------------------------------------------------------------------------------------------|
| Q8CIB5 | FERM2_MOUSE Fermitin family homolog 2 OS=Mus musculus GN=Fermt2 PE=1 SV=1                           | 5.7E-06 | 30.1 | 5.10  | 3 (3 0 0 0 0) | Cytoplasm &#x2190; cell cortex. Cytoplasm &#x2190; cytoskeleton. Cell junction &#x2190; focal adhesion. |
| P18406 | CYR61_MOUSE Protein CYR61 OS=Mus musculus GN=Cyr61 PE=1 SV=1                                        | 2.9E-05 | 30.1 | 5.00  | 3 (3 0 0 0 0) | Secreted.                                                                                               |
| Q8C7R4 | UBA6_MOUSE Ubiquitin-like modifier-activating enzyme 6 OS=Mus musculus GN=Uba6 PE=2 SV=1            | 3.8E-06 | 20.2 | 2.10  | 2 (2 0 0 0 0) | ND                                                                                                      |
| Q99JR1 | SFXN1_MOUSE Sideroflexin-1 OS=Mus musculus GN=Sfxn1 PE=1 SV=3                                       | 1.7E-07 | 28.2 | 9.90  | 4 (2 2 0 0 0) | Mitochondrion membrane; Multi-pass membrane protein.                                                    |
| P17225 | PTBP1_MOUSE Polypyrimidine tract-binding protein 1 OS=Mus musculus GN=Ptbp1 PE=1 SV=2               | 1.5E-06 | 26.2 | 5.30  | 3 (1 2 0 0 0) | Nucleus.                                                                                                |
| P21107 | TPM3_MOUSE Tropomyosin alpha-3 chain OS=Mus musculus GN=Tpm3 PE=1 SV=2                              | 1.5E-06 | 20.1 | 8.50  | 2 (2 0 0 0 0) | Cytoplasm &#x2190; cytoskeleton.                                                                        |
| Q9CQD1 | RAB5A_MOUSE Ras-related protein Rab-5A OS=Mus musculus GN=Rab5a PE=1 SV=1                           | 4.8E-07 | 20.1 | 11.20 | 2 (2 0 0 0 0) | Cell membrane; Lipid-anchor; Cytoplasmic side. Early endosome membrane; Lipid-anchor. Melanosome.       |
| Q9Z2X1 | HNRPF_MOUSE Heterogeneous nuclear ribonucleoprotein F OS=Mus musculus GN=Hnrnpf PE=1 SV=3           | 3.5E-09 | 20.3 | 8.00  | 2 (2 0 0 0 0) | Nucleus &#x2190; nucleoplasm.                                                                           |
| Q8BG05 | ROA3_MOUSE Heterogeneous nuclear ribonucleoprotein A3 OS=Mus musculus GN=Hnrnpa3 PE=1 SV=1          | 2.2E-16 | 20.3 | 8.40  | 4 (4 0 0 0 0) | Nucleus.                                                                                                |
| P63101 | 1433Z_MOUSE 14-3-3 protein zeta/delta OS=Mus musculus GN=Ywhaz PE=1 SV=1                            | 9.1E-09 | 20.3 | 10.60 | 4 (4 0 0 0 0) | Cytoplasm. Melanosome.                                                                                  |
| Q8BGH2 | SAM50_MOUSE Sorting and assembly machinery component 50 homolog OS=Mus musculus GN=Samm50 PE=1 SV=1 | 2.1E-09 | 20.1 | 4.50  | 3 (3 0 0 0 0) | Mitochondrion outer membrane; Multi-pass membrane protein. Cytoplasm.                                   |
| P86048 | RL10L_MOUSE 60S ribosomal protein L10-like OS=Mus musculus                                          | 1.5E-07 | 20.1 | 10.70 | 4 (4 0 0 0 0) | ND                                                                                                      |

|        |                                                                                                |         |      |       |                 |                                                      |
|--------|------------------------------------------------------------------------------------------------|---------|------|-------|-----------------|------------------------------------------------------|
|        | GN=Rpl10l PE=2 SV=1                                                                            |         |      |       |                 |                                                      |
| Q01721 | GAS1_MOUSE Growth arrest-specific protein 1 OS=Mus musculus GN=Gas1 PE=2 SV=2                  | 1.7E-13 | 20.3 | 14.60 | 3 (3 0 0 0 0)   | Cell membrane; Lipid-anchor &° GPI-anchor.           |
| Q80T21 | ATL4_MOUSE ADAMTS-like protein 4 OS=Mus musculus GN=Adamtsl4 PE=2 SV=1                         | 5.9E-09 | 20.3 | 2.80  | 2 (2 0 0 0 0)   | Secreted.                                            |
| P46660 | AINX_MOUSE Alpha-internexin OS=Mus musculus GN=Ina PE=1 SV=2                                   | 1.2E-08 | 20.3 | 2.40  | 13 (13 0 0 0 0) | ND                                                   |
| P03995 | GFAP_MOUSE Glial fibrillary acidic protein OS=Mus musculus GN=Gfap PE=1 SV=4                   | 2.1E-07 | 20.1 | 4.40  | 3 (3 0 0 0 0)   | Cytoplasm.                                           |
| Q62465 | VAT1_MOUSE Synaptic vesicle membrane protein VAT-1 homolog OS=Mus musculus GN=Vat1 PE=2 SV=3   | 2.5E-09 | 20.2 | 7.40  | 3 (3 0 0 0 0)   | Cytoplasm.                                           |
| P97429 | ANXA4_MOUSE Annexin A4 OS=Mus musculus GN=Anxa4 PE=2 SV=3                                      | 3.7E-09 | 20.2 | 8.20  | 2 (2 0 0 0 0)   | ND                                                   |
| Q80UM3 | NARG1_MOUSE NMDA receptor-regulated protein 1 OS=Mus musculus GN=Narg1 PE=1 SV=1               | 5.9E-05 | 20.1 | 2.50  | 2 (2 0 0 0 0)   | Cytoplasm. Nucleus. Cytoplasm &° perinuclear region. |
| Q8BGD9 | IF4B_MOUSE Eukaryotic translation initiation factor 4B OS=Mus musculus GN=Eif4b PE=1 SV=1      | 9.6E-09 | 20.2 | 5.60  | 2 (2 0 0 0 0)   | ND                                                   |
| Q9CQN1 | TRAP1_MOUSE Heat shock protein 75 kDa, mitochondrial OS=Mus musculus GN=Trap1 PE=1 SV=1        | 7.1E-07 | 20.2 | 3.30  | 2 (2 0 0 0 0)   | Mitochondrion.                                       |
| Q8BWY3 | ERF1_MOUSE Eukaryotic peptide chain release factor subunit 1 OS=Mus musculus GN=Etf1 PE=1 SV=4 | 3.2E-06 | 20.1 | 5.30  | 2 (2 0 0 0 0)   | Cytoplasm.                                           |
| P07724 | ALBU_MOUSE Serum albumin OS=Mus musculus GN=Alb PE=1 SV=3                                      | 8.8E-10 | 20.2 | 4.30  | 86 (86 0 0 0 0) | Secreted.                                            |
| Q05D44 | IF2P_MOUSE Eukaryotic translation initiation factor 5B OS=Mus musculus GN=Eif5b PE=1 SV=2      | 9.9E-08 | 20.2 | 2.30  | 3 (3 0 0 0 0)   | Cytoplasm.                                           |
| Q9CPR4 | RL17_MOUSE 60S ribosomal protein L17 OS=Mus musculus GN=Rpl17 PE=2 SV=3                        | 1.8E-06 | 20.1 | 10.30 | 2 (2 0 0 0 0)   | ND                                                   |

|        |                                                                                                                     |         |      |       |               |                                                                                         |
|--------|---------------------------------------------------------------------------------------------------------------------|---------|------|-------|---------------|-----------------------------------------------------------------------------------------|
| Q69ZF7 | CNNM4_MOUSE Metal transporter CNNM4<br>OS=Mus musculus<br>GN=Cnnm4 PE=1 SV=2                                        | 5.0E-10 | 20.2 | 3.40  | 2 (2 0 0 0 0) | Cell membrane;<br>Multi-pass<br>membrane protein.                                       |
| Q61468 | MSLN_MOUSE Mesothelin<br>OS=Mus musculus<br>GN=Msln PE=1 SV=1                                                       | 1.4E-04 | 20.1 | 3.40  | 2 (2 0 0 0 0) | Cell membrane;<br>Lipid-anchor &#x2013;<br>GPI-anchor. Golgi<br>apparatus.<br>Secreted. |
| P53986 | MOT1_MOUSE Monocarboxylate transporter 1<br>OS=Mus musculus<br>GN=Slc16a1 PE=1 SV=1                                 | 3.0E-09 | 20.2 | 7.30  | 2 (2 0 0 0 0) | Cell membrane;<br>Multi-pass<br>membrane protein.                                       |
| Q60605 | MYL6_MOUSE Myosin light polypeptide 6<br>OS=Mus musculus<br>GN=Myl6 PE=1 SV=3                                       | 3.1E-07 | 20.2 | 20.50 | 4 (4 0 0 0 0) | ND                                                                                      |
| Q9Z108 | STAU1_MOUSE Double-stranded RNA-binding protein Staufen homolog 1<br>OS=Mus musculus<br>GN=Stau1 PE=2 SV=1          | 5.3E-08 | 20.2 | 6.00  | 2 (2 0 0 0 0) | Cytoplasm. Rough<br>endoplasmic<br>reticulum.                                           |
| P62874 | GBB1_MOUSE Guanine nucleotide-binding protein G(I)/G(S)/G(T) subunit beta-1<br>OS=Mus musculus<br>GN=Gnb1 PE=1 SV=3 | 1.1E-08 | 20.1 | 6.20  | 2 (2 0 0 0 0) | ND                                                                                      |
| Q5U3K5 | PARF_MOUSE Putative GTP-binding protein Parf<br>OS=Mus musculus<br>GN=Parf PE=1 SV=2                                | 4.5E-11 | 20.2 | 4.40  | 3 (3 0 0 0 0) | Nucleus.<br>Cytoplasm.                                                                  |
| Q99K01 | PDXD1_MOUSE Pyridoxal-dependent decarboxylase domain-containing protein 1<br>OS=Mus musculus<br>GN=Pdxdc1 PE=1 SV=2 | 1.6E-07 | 20.1 | 3.20  | 2 (2 0 0 0 0) | ND                                                                                      |
| Q8VDW0 | DDX39_MOUSE ATP-dependent RNA helicase DDX39<br>OS=Mus musculus<br>GN=Ddx39 PE=2 SV=1                               | 1.0E-08 | 20.2 | 5.60  | 4 (4 0 0 0 0) | Nucleus.                                                                                |
| Q61598 | GDIB_MOUSE Rab GDP dissociation inhibitor beta<br>OS=Mus musculus<br>GN=Gdi2 PE=1 SV=1                              | 7.4E-05 | 20.1 | 5.20  | 2 (2 0 0 0 0) | Cytoplasm.<br>Membrane;<br>Peripheral<br>membrane protein.                              |
| P14869 | RLA0_MOUSE 60S acidic ribosomal protein P0<br>OS=Mus musculus<br>GN=Rplp0 PE=1 SV=3                                 | 6.7E-12 | 20.2 | 13.20 | 5 (5 0 0 0 0) | Nucleus.<br>Cytoplasm.                                                                  |
| P62270 | RS18_MOUSE 40S ribosomal protein S18<br>OS=Mus musculus<br>GN=Rps18 PE=2 SV=3                                       | 2.7E-05 | 20.1 | 13.20 | 2 (2 0 0 0 0) | Cytoplasm.                                                                              |
| Q02053 | UBA1_MOUSE Ubiquitin-                                                                                               | 1.0E-09 | 20.2 | 2.50  | 3 (3 0 0 0 0) | ND                                                                                      |

*A novel role of mitochondria in muscle injury*

|        |                                                                                                                   |         |      |       |               |                                                                                                                                                                                                                                                                                           |
|--------|-------------------------------------------------------------------------------------------------------------------|---------|------|-------|---------------|-------------------------------------------------------------------------------------------------------------------------------------------------------------------------------------------------------------------------------------------------------------------------------------------|
|        | like modifier-activating enzyme 1 OS=Mus musculus GN=Uba1 PE=1 SV=1                                               |         |      |       |               |                                                                                                                                                                                                                                                                                           |
| P24452 | CAPG_MOUSE Macrophage-capping protein OS=Mus musculus GN=Capg PE=1 SV=2                                           | 2.1E-08 | 20.2 | 7.10  | 2 (2 0 0 0 0) | Nucleus. Cytoplasm. Secreted. Melanosome.                                                                                                                                                                                                                                                 |
| Q8VE97 | SFRS4_MOUSE Splicing factor, arginine/serine-rich 4 OS=Mus musculus GN=Sfrs4 PE=2 SV=1                            | 5.1E-07 | 20.1 | 1.80  | 3 (3 0 0 0 0) | Nucleus speckle.                                                                                                                                                                                                                                                                          |
| P18760 | COF1_MOUSE Cofilin-1 OS=Mus musculus GN=Cfl1 PE=1 SV=3                                                            | 6.8E-09 | 20.2 | 15.10 | 2 (2 0 0 0 0) | Nucleus matrix. Cytoplasm $\hat{\epsilon}^{\circ}$ cytoskeleton. Cell projection $\hat{\epsilon}^{\circ}$ ruffle membrane; Peripheral membrane protein; Cytoplasmic side. Cell projection $\hat{\epsilon}^{\circ}$ lamellipodium membrane; Peripheral membrane protein; Cytoplasmic side. |
| O35286 | DHX15_MOUSE Putative pre-mRNA-splicing factor ATP-dependent RNA helicase DHX15 OS=Mus musculus GN=Dhx15 PE=2 SV=2 | 9.2E-06 | 20.1 | 2.90  | 2 (2 0 0 0 0) | Nucleus.                                                                                                                                                                                                                                                                                  |
| P17427 | AP2A2_MOUSE AP-2 complex subunit alpha-2 OS=Mus musculus GN=Ap2a2 PE=1 SV=1                                       | 9.2E-04 | 20.1 | 2.30  | 2 (2 0 0 0 0) | Cell membrane. Membrane $\hat{\epsilon}^{\circ}$ coated pit; Peripheral membrane protein; Cytoplasmic side.                                                                                                                                                                               |
| Q9Z0J7 | GDF15_MOUSE Growth/differentiation factor 15 OS=Mus musculus GN=Gdf15 PE=2 SV=1                                   | 1.9E-09 | 20.2 | 9.20  | 2 (2 0 0 0 0) | Secreted.                                                                                                                                                                                                                                                                                 |
| P49718 | MCM5_MOUSE DNA replication licensing factor MCM5 OS=Mus musculus GN=Mcm5 PE=2 SV=1                                | 1.2E-11 | 20.2 | 3.70  | 2 (2 0 0 0 0) | Nucleus.                                                                                                                                                                                                                                                                                  |
| P62137 | PP1A_MOUSE Serine/threonine-protein phosphatase PP1-alpha catalytic subunit OS=Mus musculus GN=Ppp1ca PE=1 SV=1   | 3.7E-06 | 20.1 | 8.50  | 2 (2 0 0 0 0) | Cytoplasm. Nucleus. Nucleus $\hat{\epsilon}^{\circ}$ nucleoplasm. Nucleus $\hat{\epsilon}^{\circ}$ nucleolus.                                                                                                                                                                             |
| Q61686 | CBX5_MOUSE Chromobox protein                                                                                      | 1.0E-09 | 20.2 | 12.60 | 3 (3 0 0 0 0) | Nucleus. Chromosome.                                                                                                                                                                                                                                                                      |

*A novel role of mitochondria in muscle injury*

|        |                                                                                                        |         |      |       |               |                                                                                                                                                                                      |
|--------|--------------------------------------------------------------------------------------------------------|---------|------|-------|---------------|--------------------------------------------------------------------------------------------------------------------------------------------------------------------------------------|
|        | homolog 5 OS=Mus musculus GN=Cbx5 PE=1 SV=1                                                            |         |      |       |               | Chromosome centromere.                                                                                                                                                               |
| P20108 | PRDX3_MOUSE Thioredoxin-dependent peroxide reductase, mitochondrial OS=Mus musculus GN=Prdx3 PE=1 SV=1 | 1.4E-08 | 20.1 | 8.90  | 2 (2 0 0 0 0) | Mitochondrion.                                                                                                                                                                       |
| Q8VEE4 | RFA1_MOUSE Replication protein A 70 kDa DNA-binding subunit OS=Mus musculus GN=Rpa1 PE=2 SV=1          | 1.7E-06 | 20.2 | 4.50  | 2 (2 0 0 0 0) | Nucleus.                                                                                                                                                                             |
| P18872 | GNAO_MOUSE Guanine nucleotide-binding protein G(o) subunit alpha OS=Mus musculus GN=Gnao1 PE=1 SV=3    | 2.1E-06 | 20.2 | 7.30  | 2 (2 0 0 0 0) | ND                                                                                                                                                                                   |
| Q99L45 | IF2B_MOUSE Eukaryotic translation initiation factor 2 subunit 2 OS=Mus musculus GN=Eif2s2 PE=1 SV=1    | 4.8E-08 | 20.1 | 5.40  | 2 (2 0 0 0 0) | ND                                                                                                                                                                                   |
| P25444 | RS2_MOUSE 40S ribosomal protein S2 OS=Mus musculus GN=Rps2 PE=1 SV=3                                   | 2.5E-09 | 20.2 | 7.80  | 4 (4 0 0 0 0) | ND                                                                                                                                                                                   |
| O89079 | COPE_MOUSE Coatamer subunit epsilon OS=Mus musculus GN=Cope PE=2 SV=3                                  | 2.3E-08 | 20.2 | 3.90  | 2 (2 0 0 0 0) | Cytoplasm. Golgi apparatus membrane; Peripheral membrane protein; Cytoplasmic side. Cytoplasmic vesicle COPI-coated vesicle membrane; Peripheral membrane protein; Cytoplasmic side. |
| Q9CZX8 | RS19_MOUSE 40S ribosomal protein S19 OS=Mus musculus GN=Rps19 PE=1 SV=3                                | 6.0E-05 | 20.1 | 13.80 | 2 (2 0 0 0 0) | ND                                                                                                                                                                                   |
| Q9CZU6 | CISY_MOUSE Citrate synthase, mitochondrial OS=Mus musculus GN=Cs PE=1 SV=1                             | 1.1E-10 | 20.2 | 5.80  | 3 (3 0 0 0 0) | Mitochondrion matrix.                                                                                                                                                                |
| Q8BGQ7 | SYAC_MOUSE Alanyl-tRNA synthetase, cytoplasmic OS=Mus musculus GN=Aars PE=2 SV=1                       | 2.0E-06 | 20.1 | 2.90  | 2 (2 0 0 0 0) | Cytoplasm.                                                                                                                                                                           |
| Q8QZY1 | EIF3L_MOUSE Eukaryotic                                                                                 | 6.1E-05 | 20.1 | 3.00  | 2 (2 0 0 0 0) | Cytoplasm.                                                                                                                                                                           |

|        |                                                                                              |         |      |       |                 |                                                                           |
|--------|----------------------------------------------------------------------------------------------|---------|------|-------|-----------------|---------------------------------------------------------------------------|
|        | translation initiation factor 3 subunit L OS=Mus musculus GN=Eif3l PE=1 SV=1                 |         |      |       |                 |                                                                           |
| P62267 | RS23_MOUSE 40S ribosomal protein S23 OS=Mus musculus GN=Rps23 PE=2 SV=3                      | 1.8E-07 | 20.2 | 15.40 | 4 (4 0 0 0 0)   | ND                                                                        |
| Q64511 | TOP2B_MOUSE DNA topoisomerase 2-beta OS=Mus musculus GN=Top2b PE=1 SV=2                      | 9.6E-05 | 20.1 | 1.20  | 2 (2 0 0 0 0)   | Nucleus & nucleolus.                                                      |
| P48999 | LOX5_MOUSE Arachidonate 5-lipoxygenase OS=Mus musculus GN=Alox5 PE=1 SV=2                    | 4.7E-04 | 20.1 | 2.50  | 2 (2 0 0 0 0)   | Cytoplasm. Nucleus matrix. Nucleus membrane; Peripheral membrane protein. |
| Q91V61 | SFXN3_MOUSE Sideroflexin-3 OS=Mus musculus GN=Sfxn3 PE=1 SV=1                                | 4.1E-09 | 20.2 | 8.70  | 3 (3 0 0 0 0)   | Mitochondrion membrane; Multi-pass membrane protein.                      |
| P63158 | HMGB1_MOUSE High mobility group protein B1 OS=Mus musculus GN=Hmgb1 PE=1 SV=2                | 2.7E-08 | 20.2 | 13.50 | 2 (2 0 0 0 0)   | Nucleus. Cytoplasm. Chromosome.                                           |
| Q9R0N0 | GALK1_MOUSE Galactokinase OS=Mus musculus GN=Galk1 PE=2 SV=1                                 | 4.7E-06 | 20.2 | 5.60  | 2 (2 0 0 0 0)   | ND                                                                        |
| B1AZI6 | THOC2_MOUSE THO complex subunit 2 OS=Mus musculus GN=Thoc2 PE=3 SV=1                         | 5.2E-06 | 20.2 | 1.40  | 2 (2 0 0 0 0)   | Nucleus.                                                                  |
| P15331 | PERI_MOUSE Peripherin OS=Mus musculus GN=Prph PE=1 SV=2                                      | 2.7E-08 | 20.2 | 4.40  | 30 (30 0 0 0 0) | ND                                                                        |
| Q3TXS7 | PSMD1_MOUSE 26S proteasome non-ATPase regulatory subunit 1 OS=Mus musculus GN=Psm1 PE=1 SV=1 | 3.3E-07 | 20.1 | 2.20  | 2 (2 0 0 0 0)   | ND                                                                        |
| P00405 | COX2_MOUSE Cytochrome c oxidase subunit 2 OS=Mus musculus GN=Mtco2 PE=1 SV=1                 | 6.7E-10 | 18.3 | 7.00  | 2 (1 1 0 0 0)   | Mitochondrion inner membrane; Multi-pass membrane protein.                |
| Q9CXW2 | RT22_MOUSE 28S ribosomal protein S22, mitochondrial OS=Mus musculus GN=Mrps22 PE=2 SV=1      | 1.8E-06 | 20.2 | 5.60  | 2 (2 0 0 0 0)   | Mitochondrion.                                                            |
| Q3UV17 | K22O_MOUSE Keratin, type II cytoskeletal 2 oral OS=Mus musculus                              | 1.0E-05 | 18.2 | 3.50  | 23 (22 1 0 0 0) | ND                                                                        |

|        |                                                                                                                              |         |      |       |               |                                                                                    |
|--------|------------------------------------------------------------------------------------------------------------------------------|---------|------|-------|---------------|------------------------------------------------------------------------------------|
|        | GN=Krt76 PE=2 SV=1                                                                                                           |         |      |       |               |                                                                                    |
| Q9D880 | TIM50_MOUSE Mitochondrial import inner membrane translocase subunit TIM50 OS=Mus musculus GN=Timm50 PE=1 SV=1                | 7.4E-09 | 20.2 | 6.20  | 2 (2 0 0 0 0) | Mitochondrion inner membrane; Single-pass membrane protein.                        |
| P53026 | RL10A_MOUSE 60S ribosomal protein L10a OS=Mus musculus GN=Rpl10a PE=1 SV=3                                                   | 5.3E-08 | 20.2 | 9.70  | 2 (2 0 0 0 0) | ND                                                                                 |
| P61027 | RAB10_MOUSE Ras-related protein Rab-10 OS=Mus musculus GN=Rab10 PE=1 SV=1                                                    | 1.8E-05 | 12.1 | 11.00 | 3 (0 1 0 2 0) | Cell membrane; Lipid-anchor; Cytoplasmic side.                                     |
| O08807 | PRDX4_MOUSE Peroxiredoxin-4 OS=Mus musculus GN=Prdx4 PE=1 SV=1                                                               | 2.0E-08 | 20.2 | 8.80  | 2 (2 0 0 0 0) | Cytoplasm. Secreted.                                                               |
| Q641P0 | ARP3B_MOUSE Actin-related protein 3B OS=Mus musculus GN=Actr3b PE=2 SV=1                                                     | 5.4E-09 | 20.2 | 6.20  | 2 (2 0 0 0 0) | Cytoplasm &° cytoskeleton. Cell projection.                                        |
| O54734 | OST48_MOUSE Dolichyl-diphosphooligosaccharide--protein glycosyltransferase 48 kDa subunit OS=Mus musculus GN=Ddost PE=1 SV=1 | 5.2E-07 | 20.2 | 4.50  | 2 (2 0 0 0 0) | Endoplasmic reticulum membrane; Single-pass type I membrane protein.               |
| P63037 | DNJA1_MOUSE DnaJ homolog subfamily A member 1 OS=Mus musculus GN=Dnaja1 PE=1 SV=1                                            | 1.3E-08 | 20.2 | 6.50  | 2 (2 0 0 0 0) | Membrane; Lipid-anchor.                                                            |
| Q6P5E4 | UGGG1_MOUSE UDP-glucose:glycoprotein glucosyltransferase 1 OS=Mus musculus GN=Uggt1 PE=1 SV=3                                | 5.1E-10 | 20.2 | 1.60  | 2 (2 0 0 0 0) | Endoplasmic reticulum lumen. Endoplasmic reticulum-Golgi intermediate compartment. |
| O70194 | EIF3D_MOUSE Eukaryotic translation initiation factor 3 subunit D OS=Mus musculus GN=Eif3d PE=1 SV=2                          | 5.8E-05 | 20.2 | 4.70  | 2 (2 0 0 0 0) | Cytoplasm.                                                                         |
| P35456 | UPAR_MOUSE Urokinase plasminogen activator surface receptor OS=Mus musculus GN=Plaur PE=2 SV=1                               | 3.9E-06 | 20.2 | 2.80  | 5 (5 0 0 0 0) | Cell membrane; Lipid-anchor &° GPI-anchor. Secreted.                               |
| Q9DAW9 | CNN3_MOUSE Calponin-3 OS=Mus musculus GN=Cnn3 PE=2 SV=1                                                                      | 2.5E-06 | 20.2 | 3.90  | 3 (3 0 0 0 0) | ND                                                                                 |
| Q60749 | KHDR1_MOUSE KH domain-containing, RNA-                                                                                       | 6.6E-06 | 20.2 | 5.40  | 3 (3 0 0 0 0) | Nucleus. Membrane.                                                                 |

|        |                                                                                                    |         |      |       |               |                                                                                                                                                                     |
|--------|----------------------------------------------------------------------------------------------------|---------|------|-------|---------------|---------------------------------------------------------------------------------------------------------------------------------------------------------------------|
|        | binding, signal transduction-associated protein 1 OS=Mus musculus GN=Khdrbs1 PE=1 SV=2             |         |      |       |               |                                                                                                                                                                     |
| P43276 | H15_MOUSE Histone H1.5 OS=Mus musculus GN=Hist1h1b PE=1 SV=2                                       | 2.3E-06 | 20.2 | 5.80  | 2 (2 0 0 0 0) | Nucleus. Chromosome.                                                                                                                                                |
| Q9QUR8 | SEM7A_MOUSE Semaphorin-7A OS=Mus musculus GN=Sema7a PE=2 SV=1                                      | 9.2E-06 | 20.2 | 5.10  | 2 (2 0 0 0 0) | Cell membrane; Lipid-anchor ° GPI-anchor; Extracellular side.                                                                                                       |
| Q9WUA3 | K6PP_MOUSE 6-phosphofructokinase type C OS=Mus musculus GN=Pfkp PE=1 SV=1                          | 8.8E-06 | 20.2 | 2.60  | 2 (2 0 0 0 0) | ND                                                                                                                                                                  |
| Q60931 | VDAC3_MOUSE Voltage-dependent anion-selective channel protein 3 OS=Mus musculus GN=Vdac3 PE=1 SV=1 | 1.4E-07 | 20.2 | 11.00 | 2 (2 0 0 0 0) | Mitochondrion outer membrane.                                                                                                                                       |
| P28660 | NCKP1_MOUSE Nck-associated protein 1 OS=Mus musculus GN=Nckap1 PE=2 SV=2                           | 9.4E-06 | 20.2 | 2.30  | 2 (2 0 0 0 0) | Cell membrane; Single-pass membrane protein; Cytoplasmic side. Cell projection ° lamellipodium membrane; Single-pass membrane protein; Cytoplasmic side. Cytoplasm. |
| Q60865 | CAPR1_MOUSE Caprin-1 OS=Mus musculus GN=Caprin1 PE=1 SV=2                                          | 1.6E-07 | 20.2 | 3.30  | 2 (2 0 0 0 0) | Cytoplasm ° cytosol. Cell projection ° dendrite.                                                                                                                    |
| Q921N6 | DDX27_MOUSE Probable ATP-dependent RNA helicase DDX27 OS=Mus musculus GN=Ddx27 PE=1 SV=2           | 2.1E-06 | 20.2 | 3.30  | 2 (2 0 0 0 0) | Nucleus.                                                                                                                                                            |
| O70400 | PDLI1_MOUSE PDZ and LIM domain protein 1 OS=Mus musculus GN=Pdlim1 PE=2 SV=4                       | 3.1E-07 | 20.2 | 7.30  | 2 (2 0 0 0 0) | Cytoplasm ° cytoskeleton.                                                                                                                                           |
| Q9CPY7 | AMPL_MOUSE Cytosol aminopeptidase OS=Mus musculus GN=Lap3 PE=1 SV=3                                | 1.5E-06 | 20.2 | 4.60  | 2 (2 0 0 0 0) | Cytoplasm.                                                                                                                                                          |
| Q62523 | ZYX_MOUSE Zyxin OS=Mus musculus GN=Zyx PE=1 SV=1                                                   | 1.0E-08 | 20.2 | 5.50  | 3 (3 0 0 0 0) | Cytoplasm. Cytoplasm ° cytoskeleton. Cell junction ° focal adhesion. Nucleus.                                                                                       |
| Q9DB20 | ATPO_MOUSE ATP                                                                                     | 8.4E-05 | 20.2 | 11.70 | 3 (3 0 0 0 0) | Mitochondrion.                                                                                                                                                      |



|        |                                                                                                                   |         |      |       |               |                                                                                                               |
|--------|-------------------------------------------------------------------------------------------------------------------|---------|------|-------|---------------|---------------------------------------------------------------------------------------------------------------|
|        | synthase subunit O,<br>mitochondrial OS=Mus<br>musculus GN=Atp5o PE=1<br>SV=1                                     |         |      |       |               | Mitochondrion<br>inner membrane.                                                                              |
| Q8VEM8 | MPCP_MOUSE Phosphate<br>carrier protein,<br>mitochondrial OS=Mus<br>musculus GN=Slc25a3<br>PE=1 SV=1              | 4.2E-07 | 20.2 | 6.20  | 4 (4 0 0 0 0) | Mitochondrion<br>inner membrane;<br>Multi-pass<br>membrane protein.                                           |
| P29391 | FRIL1_MOUSE Ferritin<br>light chain 1 OS=Mus<br>musculus GN=Ftl1 PE=1<br>SV=2                                     | 1.3E-04 | 20.2 | 13.10 | 2 (2 0 0 0 0) | ND                                                                                                            |
| Q91VR2 | ATPG_MOUSE ATP<br>synthase subunit gamma,<br>mitochondrial OS=Mus<br>musculus GN=Atp5c1<br>PE=1 SV=1              | 3.8E-05 | 20.2 | 8.40  | 2 (2 0 0 0 0) | Mitochondrion.<br>Mitochondrion<br>inner membrane;<br>Peripheral<br>membrane protein.                         |
| Q8C1S0 | MED19_MOUSE Mediator<br>of RNA polymerase II<br>transcription subunit 19<br>OS=Mus musculus<br>GN=Med19 PE=1 SV=1 | 6.5E-07 | 20.2 | 4.90  | 2 (2 0 0 0 0) | Nucleus.                                                                                                      |
| P08553 | NFM_MOUSE<br>Neurofilament medium<br>polypeptide OS=Mus<br>musculus GN=Nefm PE=1<br>SV=4                          | 1.6E-05 | 20.2 | 2.80  | 2 (2 0 0 0 0) | ND                                                                                                            |
| P08551 | NFL_MOUSE<br>Neurofilament light<br>polypeptide OS=Mus<br>musculus GN=Nefl PE=1<br>SV=5                           | 6.1E-07 | 20.2 | 3.70  | 2 (2 0 0 0 0) | ND                                                                                                            |
| Q08879 | FBLN1_MOUSE Fibulin-1<br>OS=Mus musculus<br>GN=Fbln1 PE=1 SV=2                                                    | 8.5E-06 | 20.2 | 3.10  | 5 (5 0 0 0 0) | Secreted $\hat{\epsilon}^{\circ}$<br>extracellular space<br>$\hat{\epsilon}^{\circ}$ extracellular<br>matrix. |
| Q921F4 | HNRL1_MOUSE<br>Heterogeneous nuclear<br>ribonucleoprotein L-like<br>OS=Mus musculus<br>GN=Hnrpl1 PE=1 SV=3        | 3.9E-06 | 20.2 | 4.10  | 2 (2 0 0 0 0) | ND                                                                                                            |
| Q8BFY9 | TNPO1_MOUSE<br>Transportin-1 OS=Mus<br>musculus GN=Tnpol PE=1<br>SV=2                                             | 6.5E-06 | 20.2 | 2.70  | 2 (2 0 0 0 0) | Cytoplasm.<br>Nucleus.                                                                                        |
| O88569 | ROA2_MOUSE<br>Heterogeneous nuclear<br>ribonucleoproteins A2/B1<br>OS=Mus musculus<br>GN=Hnrpa2b1 PE=1<br>SV=2    | 3.5E-04 | 20.2 | 7.10  | 2 (2 0 0 0 0) | Nucleus $\hat{\epsilon}^{\circ}$<br>nucleoplasm.<br>Cytoplasm.                                                |
| Q9Z1D1 | EIF3G_MOUSE<br>Eukaryotic translation<br>initiation factor 3 subunit G                                            | 2.4E-05 | 20.2 | 5.60  | 3 (3 0 0 0 0) | Cytoplasm.<br>Nucleus.<br>Cytoplasm $\hat{\epsilon}^{\circ}$                                                  |

|        |                                                                                                          |         |      |       |               |                                                                                                                                                             |
|--------|----------------------------------------------------------------------------------------------------------|---------|------|-------|---------------|-------------------------------------------------------------------------------------------------------------------------------------------------------------|
|        | OS=Mus musculus<br>GN=Eif3g PE=1 SV=2                                                                    |         |      |       |               | perinuclear region.                                                                                                                                         |
| Q61316 | HSP74_MOUSE Heat shock 70 kDa protein 4<br>OS=Mus musculus<br>GN=Hspa4 PE=1 SV=1                         | 2.4E-07 | 20.2 | 2.90  | 2 (2 0 0 0 0) | Cytoplasm.                                                                                                                                                  |
| Q60930 | VDAC2_MOUSE Voltage-dependent anion-selective channel protein 2<br>OS=Mus musculus<br>GN=Vdac2 PE=1 SV=2 | 1.4E-06 | 20.2 | 10.80 | 2 (2 0 0 0 0) | Mitochondrion outer membrane.                                                                                                                               |
| P54775 | PRS6B_MOUSE 26S protease regulatory subunit 6B<br>OS=Mus musculus<br>GN=Psmc4 PE=1 SV=1                  | 2.6E-05 | 20.2 | 5.00  | 2 (2 0 0 0 0) | Cytoplasm.<br>Nucleus.                                                                                                                                      |
| Q99LD8 | DDAH2_MOUSE N(G),N(G)-dimethylarginine dimethylaminohydrolase 2<br>OS=Mus musculus<br>GN=Ddah2 PE=1 SV=1 | 7.7E-07 | 20.2 | 7.40  | 2 (2 0 0 0 0) | ND                                                                                                                                                          |
| Q9DBJ1 | PGAM1_MOUSE Phosphoglycerate mutase 1<br>OS=Mus musculus<br>GN=Pgam1 PE=1 SV=3                           | 3.2E-08 | 20.2 | 8.30  | 2 (2 0 0 0 0) | ND                                                                                                                                                          |
| Q3V0K9 | PLSI_MOUSE Plastin-1<br>OS=Mus musculus<br>GN=Pls1 PE=2 SV=1                                             | 7.4E-08 | 20.2 | 4.10  | 2 (2 0 0 0 0) | Cytoplasm.                                                                                                                                                  |
| Q9JM76 | ARPC3_MOUSE Actin-related protein 2/3 complex subunit 3<br>OS=Mus musculus<br>GN=Arpc3 PE=1 SV=3         | 8.3E-06 | 20.2 | 10.10 | 2 (2 0 0 0 0) | Cytoplasm &° cytoskeleton. Cell projection.                                                                                                                 |
| Q62167 | DDX3X_MOUSE ATP-dependent RNA helicase DDX3X<br>OS=Mus musculus<br>GN=Ddx3x PE=1 SV=3                    | 3.1E-08 | 20.2 | 4.20  | 2 (2 0 0 0 0) | Nucleus speckle.<br>Cytoplasm.                                                                                                                              |
| Q61335 | BAP31_MOUSE B-cell receptor-associated protein 31<br>OS=Mus musculus<br>GN=Bcap31 PE=1 SV=3              | 1.1E-04 | 20.2 | 4.10  | 2 (2 0 0 0 0) | Endoplasmic reticulum membrane; Multi-pass membrane protein.<br>Endoplasmic reticulum-Golgi intermediate compartment membrane; Multi-pass membrane protein. |
| Q32MW3 | ACO10_MOUSE Acyl-coenzyme A thioesterase 10, mitochondrial<br>OS=Mus musculus<br>GN=Acot10 PE=2 SV=1     | 1.2E-04 | 20.2 | 2.30  | 2 (2 0 0 0 0) | Mitochondrion.                                                                                                                                              |
| P80316 | TCPE_MOUSE T-complex                                                                                     | 3.6E-08 | 20.2 | 3.30  | 3 (3 0 0 0 0) | Cytoplasm.                                                                                                                                                  |

|        |                                                                                                                     |         |      |      |               |                                                                                                                                                                    |
|--------|---------------------------------------------------------------------------------------------------------------------|---------|------|------|---------------|--------------------------------------------------------------------------------------------------------------------------------------------------------------------|
|        | protein 1 subunit epsilon<br>OS=Mus musculus<br>GN=Cct5 PE=1 SV=1                                                   |         |      |      |               | Cytoplasm &°<br>cytoskeleton &°<br>centrosome.                                                                                                                     |
| Q91W97 | HKDC1_MOUSE Putative<br>hexokinase HKDC1<br>OS=Mus musculus<br>GN=Hkdc1 PE=2 SV=1                                   | 5.4E-08 | 20.2 | 1.70 | 2 (2 0 0 0 0) | ND                                                                                                                                                                 |
| Q62261 | SPTB2_MOUSE Spectrin<br>beta chain, brain 1 OS=Mus<br>musculus GN=Sptbn1<br>PE=1 SV=2                               | 8.0E-06 | 20.2 | 1.10 | 2 (2 0 0 0 0) | Cytoplasm &°<br>cytoskeleton.<br>Cytoplasm &°<br>myofibril &°<br>sarcomere &° M<br>line. Cell<br>membrane;<br>Peripheral<br>membrane protein;<br>Cytoplasmic side. |
| P30285 | CDK4_MOUSE Cell<br>division protein kinase 4<br>OS=Mus musculus<br>GN=Cdk4 PE=1 SV=1                                | 1.0E-06 | 20.2 | 8.90 | 2 (2 0 0 0 0) | Cytoplasm.<br>Nucleus.<br>Membrane.                                                                                                                                |
| Q60751 | IGF1R_MOUSE Insulin-<br>like growth factor 1<br>receptor OS=Mus musculus<br>GN=Igf1r PE=1 SV=3                      | 7.6E-06 | 20.1 | 1.70 | 2 (2 0 0 0 0) | Membrane; Single-<br>pass type I<br>membrane protein.                                                                                                              |
| Q8C0Z1 | ITFG3_MOUSE Protein<br>ITFG3 OS=Mus musculus<br>GN=Itfg3 PE=1 SV=1                                                  | 1.4E-06 | 20.1 | 3.60 | 2 (2 0 0 0 0) | Membrane; Single-<br>pass type II<br>membrane protein.                                                                                                             |
| Q9QZN4 | FBX6_MOUSE F-box only<br>protein 6 OS=Mus<br>musculus GN=Fbxo6 PE=1<br>SV=1                                         | 3.3E-07 | 20.1 | 7.50 | 2 (2 0 0 0 0) | Cytoplasm.                                                                                                                                                         |
| P22777 | PAI1_MOUSE<br>Plasminogen activator<br>inhibitor 1 OS=Mus<br>musculus GN=Serpine1<br>PE=1 SV=1                      | 3.2E-06 | 20.1 | 5.00 | 2 (2 0 0 0 0) | Secreted.                                                                                                                                                          |
| Q61033 | LAP2A_MOUSE Lamina-<br>associated polypeptide 2,<br>isoforms alpha/zeta<br>OS=Mus musculus<br>GN=Tmpo PE=1 SV=3     | 1.4E-04 | 20.1 | 3.50 | 3 (3 0 0 0 0) | Nucleus.<br>Chromosome.                                                                                                                                            |
| Q9D8V0 | HM13_MOUSE Minor<br>histocompatibility antigen<br>H13 OS=Mus musculus<br>GN=Hm13 PE=1 SV=1                          | 8.6E-07 | 20.1 | 3.20 | 3 (3 0 0 0 0) | Endoplasmic<br>reticulum<br>membrane; Multi-<br>pass membrane<br>protein. Cell<br>membrane; Multi-<br>pass membrane<br>protein.                                    |
| Q9R1J0 | NSDHL_MOUSE Sterol-4-<br>alpha-carboxylate 3-<br>dehydrogenase,<br>decarboxylating OS=Mus<br>musculus GN=Nsdhl PE=2 | 2.2E-06 | 20.1 | 6.60 | 2 (2 0 0 0 0) | Membrane; Single-<br>pass membrane<br>protein.                                                                                                                     |

|        |                                                                                                                          |         |      |       |               |                                                                                                     |
|--------|--------------------------------------------------------------------------------------------------------------------------|---------|------|-------|---------------|-----------------------------------------------------------------------------------------------------|
|        | SV=1                                                                                                                     |         |      |       |               |                                                                                                     |
| Q9DCL9 | PUR6_MOUSE<br>Multifunctional protein<br>ADE2 OS=Mus musculus<br>GN=Paics PE=1 SV=3                                      | 2.6E-07 | 20.1 | 4.70  | 2 (2 0 0 0 0) | ND                                                                                                  |
| Q9JLM8 | DCLK1_MOUSE<br>Serine/threonine-protein<br>kinase DCLK1 OS=Mus<br>musculus GN=Dclk1 PE=1<br>SV=1                         | 2.3E-07 | 20.1 | 3.20  | 2 (2 0 0 0 0) | ND                                                                                                  |
| Q91W90 | TXND5_MOUSE<br>Thioredoxin domain-<br>containing protein 5<br>OS=Mus musculus<br>GN=Txndc5 PE=1 SV=2                     | 1.3E-05 | 20.1 | 4.30  | 2 (2 0 0 0 0) | Endoplasmic<br>reticulum lumen.                                                                     |
| P29341 | PABP1_MOUSE<br>Polyadenylate-binding<br>protein 1 OS=Mus<br>musculus GN=Pabpc1<br>PE=1 SV=1                              | 2.1E-04 | 20.1 | 3.60  | 2 (2 0 0 0 0) | Cytoplasm.<br>Nucleus.                                                                              |
| Q9WTS6 | TEN3_MOUSE Teneurin-3<br>OS=Mus musculus<br>GN=Odz3 PE=1 SV=1                                                            | 1.7E-05 | 20.1 | 1.40  | 2 (2 0 0 0 0) | Membrane; Single-<br>pass type II<br>membrane protein.                                              |
| P62900 | RL31_MOUSE 60S<br>ribosomal protein L31<br>OS=Mus musculus<br>GN=Rpl31 PE=2 SV=1                                         | 1.7E-04 | 20.1 | 15.20 | 2 (2 0 0 0 0) | ND                                                                                                  |
| P51174 | ACADL_MOUSE Long-<br>chain specific acyl-CoA<br>dehydrogenase,<br>mitochondrial OS=Mus<br>musculus GN=Acadl PE=2<br>SV=2 | 2.3E-08 | 20.1 | 5.10  | 3 (3 0 0 0 0) | Mitochondrion<br>matrix.                                                                            |
| P60229 | EIF3E_MOUSE Eukaryotic<br>translation initiation factor<br>3 subunit E OS=Mus<br>musculus GN=Eif3e PE=1<br>SV=1          | 6.3E-04 | 20.1 | 4.50  | 2 (2 0 0 0 0) | Cytoplasm.<br>Nucleus ° PML<br>body.                                                                |
| Q9DBG3 | AP2B1_MOUSE AP-2<br>complex subunit beta<br>OS=Mus musculus<br>GN=Ap2b1 PE=1 SV=1                                        | 4.1E-06 | 20.1 | 2.20  | 2 (2 0 0 0 0) | Cell membrane.<br>Membrane °<br>coated pit;<br>Peripheral<br>membrane protein;<br>Cytoplasmic side. |
| Q9WV32 | ARC1B_MOUSE Actin-<br>related protein 2/3 complex<br>subunit 1B OS=Mus<br>musculus GN=Arpc1b<br>PE=1 SV=3                | 1.7E-04 | 20.1 | 5.40  | 2 (2 0 0 0 0) | Cytoplasm °<br>cytoskeleton.                                                                        |
| Q9JK48 | SHLB1_MOUSE<br>Endophilin-B1 OS=Mus<br>musculus GN=Sh3glb1<br>PE=1 SV=1                                                  | 1.6E-05 | 20.1 | 5.80  | 2 (2 0 0 0 0) | Cytoplasm. Golgi<br>apparatus<br>membrane;<br>Peripheral<br>membrane protein.<br>Mitochondrion      |

*A novel role of mitochondria in muscle injury*

|        |                                                                                                        |         |      |      |               |                                                         |
|--------|--------------------------------------------------------------------------------------------------------|---------|------|------|---------------|---------------------------------------------------------|
|        |                                                                                                        |         |      |      |               | outer membrane;<br>Peripheral<br>membrane protein.      |
| Q8CFI0 | NED4L_MOUSE E3<br>ubiquitin-protein ligase<br>NEDD4-like OS=Mus<br>musculus GN=Nedd4l<br>PE=1 SV=2     | 1.0E-06 | 18.2 | 2.00 | 2 (1 1 0 0 0) | Cytoplasm.                                              |
| P62192 | PRS4_MOUSE 26S<br>protease regulatory subunit<br>4 OS=Mus musculus<br>GN=Psmc1 PE=1 SV=1               | 1.2E-07 | 18.2 | 5.50 | 2 (1 1 0 0 0) | Cytoplasm.<br>Nucleus.                                  |
| P05977 | MLE1_MOUSE Myosin<br>light chain 1, skeletal<br>muscle isoform OS=Mus<br>musculus GN=My1l PE=1<br>SV=2 | 6.3E-10 | 16.2 | 8.50 | 3 (0 3 0 0 0) | ND                                                      |
| A8C756 | THADA_MOUSE Thyroid<br>adenoma-associated protein<br>homolog OS=Mus<br>musculus GN=Thada PE=2<br>SV=1  | 2.2E-05 | 16.1 | 0.80 | 2 (0 2 0 0 0) | ND                                                      |
| Q9JJN5 | CBPN_MOUSE<br>Carboxypeptidase N<br>catalytic chain OS=Mus<br>musculus GN=Cpn1 PE=2<br>SV=1            | 4.7E-04 | 16.1 | 2.00 | 2 (0 2 0 0 0) | Secreted $\hat{\alpha}^{\circ}$<br>extracellular space. |

**Table S2**

| Accession | Reference                                                                                          | P (pro)  | Score | Coverage | Peptide (Hits)        | Subcellular locations                                                                                                                                                            |
|-----------|----------------------------------------------------------------------------------------------------|----------|-------|----------|-----------------------|----------------------------------------------------------------------------------------------------------------------------------------------------------------------------------|
| Q9QXS1    | PLEC1_MOUSE Plectin-1<br>OS=Mus musculus<br>GN=Plec1 PE=1 SV=2                                     | 3.11E-14 | 998.3 | 21.7     | 154 (153 1 0<br>0 0)  | Cytoplasm &° cytoskeleton. Cell junction &° hemidesmosome.                                                                                                                       |
| P20152    | VIME_MOUSE Vimentin<br>OS=Mus musculus GN=Vim<br>PE=1 SV=3                                         | 1.00E-30 | 594.3 | 57.9     | 784 (774 4 5<br>1 0)  | ND                                                                                                                                                                               |
| Q8BTM8    | FLNA_MOUSE Filamin-A<br>OS=Mus musculus GN=Flna<br>PE=1 SV=4                                       | 2.11E-14 | 500.3 | 23.7     | 93 (92 1 0 0<br>0)    | Cytoplasm &° cell cortex. Cytoplasm &° cytoskeleton.                                                                                                                             |
| Q69ZN7    | MYOF_MOUSE Myoferlin<br>OS=Mus musculus<br>GN=Myof PE=1 SV=2                                       | 2.22E-16 | 370.3 | 22.7     | 108 (108 0 0<br>0 0)  | Cell membrane; Single-pass type II membrane protein. Nucleus membrane; Single-pass type II membrane protein. Cytoplasmic vesicle membrane; Single-pass type II membrane protein. |
| Q6P5H2    | NEST_MOUSE Nestin<br>OS=Mus musculus GN=Nes<br>PE=1 SV=1                                           | 2.82E-13 | 470.3 | 30.3     | 149 (149 0 0<br>0 0)  | ND                                                                                                                                                                               |
| P62737    | ACTA_MOUSE Actin,<br>aortic smooth muscle<br>OS=Mus musculus<br>GN=Acta2 PE=1 SV=1                 | 6.66E-15 | 394.3 | 54.9     | 347 (343 4 0<br>0 0)  | Cytoplasm &° cytoskeleton.                                                                                                                                                       |
| P20029    | GRP78_MOUSE 78 kDa<br>glucose-regulated protein<br>OS=Mus musculus<br>GN=Hspa5 PE=1 SV=3           | 1.67E-13 | 360.3 | 44.3     | 217 (217 0 0<br>0 0)  | Endoplasmic reticulum lumen. Melanosome.                                                                                                                                         |
| P56480    | ATPB_MOUSE ATP<br>synthase subunit beta,<br>mitochondrial OS=Mus<br>musculus GN=Atp5b PE=1<br>SV=2 | 1.89E-14 | 346.3 | 58.6     | 116 (109 7 0<br>0 0)  | Mitochondrion. Mitochondrion inner membrane.                                                                                                                                     |
| Q8VDD5    | MYH9_MOUSE Myosin-9<br>OS=Mus musculus<br>GN=Myh9 PE=1 SV=4                                        | 2.91E-10 | 388.3 | 16.1     | 73 (72 1 0 0<br>0)    | ND                                                                                                                                                                               |
| Q5SWU9    | ACACA_MOUSE Acetyl-<br>CoA carboxylase 1 OS=Mus<br>musculus GN=Acaca PE=1<br>SV=1                  | 1.00E-30 | 380.3 | 18.6     | 71 (71 0 0 0<br>0)    | Cytoplasm.                                                                                                                                                                       |
| P31001    | DESM_MOUSE Desmin<br>OS=Mus musculus GN=Des<br>PE=1 SV=3                                           | 1.78E-14 | 324.3 | 65.2     | 210 (194 15 1<br>0 0) | Cytoplasm.                                                                                                                                                                       |
| P08113    | ENPL_MOUSE<br>Endoplasmin OS=Mus<br>musculus GN=Hsp90b1                                            | 1.18E-11 | 318.2 | 29.8     | 112 (111 1 0<br>0 0)  | Endoplasmic reticulum lumen. Melanosome.                                                                                                                                         |

|        |                                                                                                      |          |       |      |                   |                                                                                                                                                                                                                                                     |
|--------|------------------------------------------------------------------------------------------------------|----------|-------|------|-------------------|-----------------------------------------------------------------------------------------------------------------------------------------------------------------------------------------------------------------------------------------------------|
|        | PE=1 SV=2                                                                                            |          |       |      |                   |                                                                                                                                                                                                                                                     |
| P63038 | CH60_MOUSE 60 kDa heat shock protein, mitochondrial OS=Mus musculus GN=Hspd1 PE=1 SV=1               | 8.88E-15 | 300.3 | 37.7 | 101 (101 0 0 0 0) | Mitochondrion matrix.                                                                                                                                                                                                                               |
| P13595 | NCAM1_MOUSE Neural cell adhesion molecule 1 OS=Mus musculus GN=Ncam1 PE=1 SV=3                       | 1.00E-30 | 278.3 | 25.3 | 64 (63 1 0 0 0)   | Cell membrane; Single-pass type I membrane protein. Cell membrane; Lipid-anchor ° GPI-anchor.                                                                                                                                                       |
| Q8BMK4 | CKAP4_MOUSE Cytoskeleton-associated protein 4 OS=Mus musculus GN=Ckap4 PE=2 SV=2                     | 7.77E-15 | 290.3 | 54.1 | 55 (55 0 0 0 0)   | Endoplasmic reticulum-Golgi intermediate compartment membrane; Single-pass membrane protein.                                                                                                                                                        |
| Q61738 | ITA7_MOUSE Integrin alpha-7 OS=Mus musculus GN=Itga7 PE=1 SV=2                                       | 2.78E-14 | 270.3 | 23.3 | 106 (106 0 0 0 0) | Membrane; Single-pass type I membrane protein.                                                                                                                                                                                                      |
| Q8VDN2 | AT1A1_MOUSE Sodium/potassium-transporting ATPase subunit alpha-1 OS=Mus musculus GN=Atp1a1 PE=1 SV=1 | 2.78E-14 | 270.3 | 22.0 | 95 (95 0 0 0 0)   | Cell membrane; Multi-pass membrane protein.                                                                                                                                                                                                         |
| P26041 | MOES_MOUSE Moesin OS=Mus musculus GN=Msn PE=1 SV=3                                                   | 4.45E-12 | 288.3 | 26.5 | 48 (44 4 0 0 0)   | Cell membrane; Peripheral membrane protein; Cytoplasmic side. Cytoplasm ° cytoskeleton. Apical cell membrane; Peripheral membrane protein; Cytoplasmic side. Cell projection ° microvillus membrane; Peripheral membrane protein; Cytoplasmic side. |
| P63017 | HSP7C_MOUSE Heat shock cognate 71 kDa protein OS=Mus musculus GN=Hspa8 PE=1 SV=1                     | 3.32E-12 | 280.3 | 31.4 | 130 (130 0 0 0 0) | Cytoplasm. Melanosome.                                                                                                                                                                                                                              |
| P97449 | AMPN_MOUSE Aminopeptidase N OS=Mus musculus GN=Anpep PE=1 SV=4                                       | 7.77E-15 | 260.3 | 30.2 | 47 (47 0 0 0 0)   | Membrane; Single-pass type II membrane protein.                                                                                                                                                                                                     |
| P35564 | CALX_MOUSE Calnexin OS=Mus musculus GN=Canx PE=1 SV=1                                                | 1.35E-12 | 278.2 | 29.8 | 65 (64 1 0 0 0)   | Endoplasmic reticulum membrane; Single-pass type I                                                                                                                                                                                                  |

*A novel role of mitochondria in muscle injury*

|        |                                                                                 |          |       |      |                   |                                                                                                                                                                                                                 |
|--------|---------------------------------------------------------------------------------|----------|-------|------|-------------------|-----------------------------------------------------------------------------------------------------------------------------------------------------------------------------------------------------------------|
|        |                                                                                 |          |       |      |                   | membrane protein.<br>Melanosome.                                                                                                                                                                                |
| Q02248 | CTNB1_MOUSE Catenin beta-1 OS=Mus musculus GN=Ctnnb1 PE=1 SV=1                  | 1.11E-16 | 260.3 | 28.3 | 58 (58 0 0 0 0)   | Cytoplasm.<br>Cytoplasm $\hat{\epsilon}^{\circ}$ cytoskeleton.<br>Nucleus. Cell junction $\hat{\epsilon}^{\circ}$ adherens junction.<br>Cell junction. Cell membrane.                                           |
| P27773 | PDIA3_MOUSE Protein disulfide-isomerase A3 OS=Mus musculus GN=Pdia3 PE=1 SV=2   | 5.45E-12 | 270.2 | 44.4 | 126 (126 0 0 0 0) | Endoplasmic reticulum lumen.<br>Melanosome.                                                                                                                                                                     |
| P43406 | ITAV_MOUSE Integrin alpha-V OS=Mus musculus GN=Itgav PE=1 SV=1                  | 3.44E-14 | 258.3 | 27.9 | 31 (30 1 0 0 0)   | Membrane; Single-pass type I membrane protein.                                                                                                                                                                  |
| P09103 | PDIA1_MOUSE Protein disulfide-isomerase OS=Mus musculus GN=P4hb PE=1 SV=1       | 9.57E-11 | 260.3 | 39.5 | 97 (97 0 0 0 0)   | Endoplasmic reticulum lumen.<br>Melanosome. Cell membrane;<br>Peripheral membrane protein.                                                                                                                      |
| P38647 | GRP75_MOUSE Stress-70 protein, mitochondrial OS=Mus musculus GN=Hspa9 PE=1 SV=2 | 2.22E-14 | 240.3 | 34.6 | 93 (93 0 0 0 0)   | Mitochondrion.                                                                                                                                                                                                  |
| Q02257 | PLAK_MOUSE Junction plakoglobin OS=Mus musculus GN=Jup PE=1 SV=3                | 5.77E-14 | 220.3 | 24.3 | 64 (64 0 0 0 0)   | Cell junction $\hat{\epsilon}^{\circ}$ adherens junction.<br>Cell junction $\hat{\epsilon}^{\circ}$ desmosome.<br>Cytoplasm $\hat{\epsilon}^{\circ}$ cytoskeleton.<br>Membrane;<br>Peripheral membrane protein. |
| O08917 | FLOT1_MOUSE Flotillin-1 OS=Mus musculus GN=Flot1 PE=1 SV=1                      | 2.71E-13 | 200.3 | 47.2 | 48 (48 0 0 0 0)   | Cell membrane;<br>Peripheral membrane protein.<br>Membrane $\hat{\epsilon}^{\circ}$ caveola; Peripheral membrane protein.<br>Melanosome.<br>Endosome.                                                           |
| P19324 | SERPH_MOUSE Serpin H1 OS=Mus musculus GN=Serpinh1 PE=1 SV=2                     | 4.44E-15 | 238.3 | 46.8 | 92 (91 1 0 0 0)   | Endoplasmic reticulum lumen.                                                                                                                                                                                    |
| P33146 | CAD15_MOUSE Cadherin-15 OS=Mus musculus GN=Cdh15 PE=1 SV=2                      | 3.33E-16 | 190.3 | 29.0 | 47 (47 0 0 0 0)   | Cell membrane;<br>Single-pass type I membrane protein.                                                                                                                                                          |



*A novel role of mitochondria in muscle injury*

|        |                                                                                                                       |          |       |      |                   |                                                                                                                                                                                       |
|--------|-----------------------------------------------------------------------------------------------------------------------|----------|-------|------|-------------------|---------------------------------------------------------------------------------------------------------------------------------------------------------------------------------------|
| Q91ZX7 | LRP1_MOUSE Prolow-density lipoprotein receptor-related protein 1 OS=Mus musculus GN=Lrp1 PE=1 SV=1                    | 2.24E-09 | 220.2 | 4.6  | 33 (33 0 0 0 0)   | Cell membrane; Single-pass type I membrane protein. Membrane ° coated pit. Cell membrane; Peripheral membrane protein; Extracellular side. Membrane ° coated pit. Cytoplasm. Nucleus. |
| P20029 | GRP78_MOUSE 78 kDa glucose-regulated protein OS=Mus musculus GN=Hspa5 PE=1 SV=3                                       | 1.61E-13 | 190.3 | 34.8 | 28 (28 0 0 0 0)   | Endoplasmic reticulum lumen. Melanosome.                                                                                                                                              |
| Q99PL5 | RRBP1_MOUSE Ribosome-binding protein 1 OS=Mus musculus GN=Rrbp1 PE=2 SV=2                                             | 1.00E-30 | 210.3 | 13.3 | 49 (49 0 0 0 0)   | Endoplasmic reticulum membrane; Single-pass type III membrane protein.                                                                                                                |
| P11276 | FINC_MOUSE Fibronectin OS=Mus musculus GN=Fn1 PE=1 SV=3                                                               | 1.44E-14 | 190.3 | 8.9  | 48 (48 0 0 0 0)   | Secreted ° extracellular space ° extracellular matrix.                                                                                                                                |
| Q7TMM9 | TBB2A_MOUSE Tubulin beta-2A chain OS=Mus musculus GN=Tubb2a PE=1 SV=1                                                 | 3.46E-12 | 200.3 | 26.3 | 130 (130 0 0 0 0) | Cytoplasm ° cytoskeleton.                                                                                                                                                             |
| P08003 | PDIA4_MOUSE Protein disulfide-isomerase A4 OS=Mus musculus GN=Pdia4 PE=1 SV=2                                         | 1.27E-10 | 196.3 | 27.7 | 34 (30 4 0 0 0)   | Endoplasmic reticulum lumen. Melanosome.                                                                                                                                              |
| P11688 | ITA5_MOUSE Integrin alpha-5 OS=Mus musculus GN=Itga5 PE=1 SV=2                                                        | 6.07E-11 | 180.2 | 18.3 | 41 (41 0 0 0 0)   | Membrane; Single-pass type I membrane protein.                                                                                                                                        |
| Q9DBG6 | RPN2_MOUSE Dolichyl-diphosphooligosaccharide--protein glycosyltransferase subunit 2 OS=Mus musculus GN=Rpn2 PE=2 SV=1 | 1.11E-16 | 190.3 | 36.0 | 30 (30 0 0 0 0)   | Endoplasmic reticulum membrane; Multi-pass membrane protein.                                                                                                                          |
| Q80X90 | FLNB_MOUSE Filamin-B OS=Mus musculus GN=Flnb PE=1 SV=2                                                                | 3.33E-15 | 170.3 | 7.8  | 19 (19 0 0 0 0)   | Cytoplasm ° cell cortex. Cytoplasm ° myofibril ° sarcomere ° Z line. Cytoplasm ° cytoskeleton.                                                                                        |
| Q03265 | ATPA_MOUSE ATP synthase subunit alpha, mitochondrial OS=Mus musculus GN=Atp5a1 PE=1 SV=1                              | 3.11E-14 | 180.3 | 30.6 | 87 (87 0 0 0 0)   | Mitochondrion inner membrane. Cell membrane; Peripheral membrane protein; Extracellular side.                                                                                         |

*A novel role of mitochondria in muscle injury*

|        |                                                                                                             |          |       |      |                    |                                                                                                                                                                                  |
|--------|-------------------------------------------------------------------------------------------------------------|----------|-------|------|--------------------|----------------------------------------------------------------------------------------------------------------------------------------------------------------------------------|
| P16546 | SPTA2_MOUSE Spectrin alpha chain, brain OS=Mus musculus GN=Sptan1 PE=1 SV=4                                 | 2.10E-07 | 170.2 | 6.3  | 21 (21 0 0 0 0)    | Cytoplasm $\hat{\epsilon}^{\circ}$ cytoskeleton. Cytoplasm $\hat{\epsilon}^{\circ}$ cell cortex.                                                                                 |
| P09055 | ITB1_MOUSE Integrin beta-1 OS=Mus musculus GN=Itgb1 PE=1 SV=1                                               | 1.15E-12 | 168.3 | 17.5 | 161 (128 33 0 0 0) | Cell membrane; Single-pass type I membrane protein. Melanosome.                                                                                                                  |
| Q9DCN2 | NB5R3_MOUSE NADH-cytochrome b5 reductase 3 OS=Mus musculus GN=Cyb5r3 PE=1 SV=3                              | 1.00E-30 | 170.4 | 48.5 | 36 (36 0 0 0 0)    | Endoplasmic reticulum membrane; Lipid-anchor; Cytoplasmic side. Mitochondrion outer membrane; Lipid-anchor; Cytoplasmic side. Cytoplasm $\hat{\epsilon}^{\circ}$ cytosol.        |
| P15116 | CADH2_MOUSE Cadherin-2 OS=Mus musculus GN=Cdh2 PE=1 SV=1                                                    | 8.88E-15 | 160.4 | 27.8 | 33 (33 0 0 0 0)    | Cell membrane; Single-pass type I membrane protein.                                                                                                                              |
| P67778 | PHB_MOUSE Prohibitin OS=Mus musculus GN=Phb PE=1 SV=1                                                       | 6.66E-15 | 170.3 | 59.9 | 38 (38 0 0 0 0)    | Mitochondrion inner membrane.                                                                                                                                                    |
| Q9WV91 | FPRP_MOUSE Prostaglandin F2 receptor negative regulator OS=Mus musculus GN=Ptgfrn PE=1 SV=1                 | 3.33E-14 | 160.3 | 15.2 | 31 (31 0 0 0 0)    | Endoplasmic reticulum membrane; Single-pass type I membrane protein. Golgi apparatus $\hat{\epsilon}^{\circ}$ trans-Golgi network membrane; Single-pass type I membrane protein. |
| Q922R8 | PDIA6_MOUSE Protein disulfide-isomerase A6 OS=Mus musculus GN=Pdia6 PE=1 SV=3                               | 1.58E-12 | 170.2 | 32.7 | 55 (55 0 0 0 0)    | Endoplasmic reticulum lumen. Cell membrane. Melanosome.                                                                                                                          |
| O08532 | CA2D1_MOUSE Voltage-dependent calcium channel subunit alpha-2/delta-1 OS=Mus musculus GN=Cacna2d1 PE=1 SV=1 | 3.49E-13 | 158.3 | 18.0 | 24 (23 1 0 0 0)    | Membrane; Single-pass type I membrane protein.                                                                                                                                   |
| P26040 | EZRI_MOUSE Ezrin OS=Mus musculus GN=Ezr PE=1 SV=3                                                           | 1.98E-12 | 170.2 | 23.0 | 64 (64 0 0 0 0)    | Apical cell membrane; Peripheral membrane protein; Cytoplasmic side. Cell projection. Cell projection $\hat{\epsilon}^{\circ}$ microvillus membrane; Peripheral                  |

*A novel role of mitochondria in muscle injury*

|        |                                                                                           |          |       |      |                  |                                                                                                                                                                             |
|--------|-------------------------------------------------------------------------------------------|----------|-------|------|------------------|-----------------------------------------------------------------------------------------------------------------------------------------------------------------------------|
|        |                                                                                           |          |       |      |                  | membrane protein; Cytoplasmic side. Cell projection &° ruffle membrane; Peripheral membrane protein; Cytoplasmic side. Cytoplasm &° cell cortex. Cytoplasm &° cytoskeleton. |
| Q91XV3 | BASP1_MOUSE Brain acid soluble protein 1 OS=Mus musculus GN=Basp1 PE=1 SV=3               | 5.55E-15 | 160.3 | 92.9 | 31 (31 0 0 0 0)  | Cell membrane; Lipid-anchor. Cell projection &° growth cone.                                                                                                                |
| P17182 | ENO1_MOUSE Alpha-enolase OS=Mus musculus GN=Eno1 PE=1 SV=3                                | 1.28E-13 | 156.3 | 31.3 | 23 (21 2 0 0 0)  | Cytoplasm. Cell membrane.                                                                                                                                                   |
| Q62470 | ITA3_MOUSE Integrin alpha-3 OS=Mus musculus GN=Itga3 PE=1 SV=1                            | 8.88E-15 | 150.3 | 20.5 | 27 (27 0 0 0 0)  | Membrane; Single-pass type I membrane protein.                                                                                                                              |
| P07901 | HS90A_MOUSE Heat shock protein HSP 90-alpha OS=Mus musculus GN=Hsp90aa1 PE=1 SV=4         | 1.55E-11 | 154.3 | 19.6 | 61 (28 33 0 0 0) | Cytoplasm. Melanosome.                                                                                                                                                      |
| P52480 | KPYM_MOUSE Pyruvate kinase isozymes M1/M2 OS=Mus musculus GN=Pkm2 PE=1 SV=4               | 3.00E-14 | 150.3 | 35.8 | 23 (23 0 0 0 0)  | Cytoplasm. Nucleus.                                                                                                                                                         |
| Q62261 | SPTB2_MOUSE Spectrin beta chain, brain 1 OS=Mus musculus GN=Sptbn1 PE=1 SV=2              | 7.83E-12 | 150.3 | 8.3  | 15 (15 0 0 0 0)  | Cytoplasm &° cytoskeleton. Cytoplasm &° myofibril &° sarcomere &° M line. Cell membrane; Peripheral membrane protein; Cytoplasmic side.                                     |
| P54116 | STOM_MOUSE Erythrocyte band 7 integral membrane protein OS=Mus musculus GN=Stom PE=1 SV=3 | 4.44E-14 | 150.3 | 42.3 | 21 (21 0 0 0 0)  | Cell membrane; Peripheral membrane protein; Cytoplasmic side. Cell membrane; Lipid-anchor; Cytoplasmic side. Melanosome.                                                    |
| Q9QZF2 | GPC1_MOUSE Glypican-1 OS=Mus musculus GN=Gpc1 PE=1 SV=1                                   | 3.33E-16 | 140.3 | 31.1 | 41 (41 0 0 0 0)  | Cell membrane; Lipid-anchor &° GPI-anchor; Extracellular side. Secreted &° extracellular space.                                                                             |
| P60843 | IF4A1_MOUSE Eukaryotic initiation factor 4A-I OS=Mus musculus                             | 2.39E-12 | 150.3 | 27.3 | 24 (24 0 0 0 0)  | ND                                                                                                                                                                          |

|        |                                                                                                  |          |       |      |                   |                                                                                                                             |
|--------|--------------------------------------------------------------------------------------------------|----------|-------|------|-------------------|-----------------------------------------------------------------------------------------------------------------------------|
|        | GN=Eif4a1 PE=2 SV=1                                                                              |          |       |      |                   |                                                                                                                             |
| P58242 | ASM3B_MOUSE Acid sphingomyelinase-like phosphodiesterase 3b OS=Mus musculus GN=Smpd13b PE=1 SV=1 | 1.11E-15 | 136.3 | 28.7 | 28 (26 2 0 0 0)   | Secreted.                                                                                                                   |
| P14211 | CALR_MOUSE Calreticulin OS=Mus musculus GN=Calr PE=1 SV=1                                        | 2.55E-14 | 140.3 | 38.9 | 37 (37 0 0 0 0)   | Endoplasmic reticulum lumen. Cytoplasmic granule.                                                                           |
| P14602 | HSPB1_MOUSE Heat shock protein beta-1 OS=Mus musculus GN=Hspb1 PE=1 SV=3                         | 3.33E-16 | 130.4 | 68.9 | 122 (122 0 0 0 0) | Cytoplasm. Nucleus. Cytoplasm &° cytoskeleton &° spindle.                                                                   |
| P47738 | ALDH2_MOUSE Aldehyde dehydrogenase, mitochondrial OS=Mus musculus GN=Aldh2 PE=1 SV=1             | 6.17E-11 | 140.2 | 28.3 | 33 (33 0 0 0 0)   | Mitochondrion matrix.                                                                                                       |
| P48678 | LMNA_MOUSE Lamin-A/C OS=Mus musculus GN=Lmna PE=1 SV=2                                           | 3.23E-12 | 130.2 | 21.8 | 20 (20 0 0 0 0)   | Nucleus. Nucleus envelope.                                                                                                  |
| P10852 | 4F2_MOUSE 4F2 cell-surface antigen heavy chain OS=Mus musculus GN=Slc3a2 PE=1 SV=1               | 4.03E-09 | 140.2 | 25.3 | 38 (38 0 0 0 0)   | Apical cell membrane; Single-pass type II membrane protein. Melanosome.                                                     |
| Q8R422 | CD109_MOUSE CD109 antigen OS=Mus musculus GN=Cd109 PE=2 SV=1                                     | 8.92E-13 | 120.3 | 12.8 | 24 (24 0 0 0 0)   | Cell membrane; Lipid-anchor &° GPI-anchor.                                                                                  |
| Q8VHX6 | FLNC_MOUSE Filamin-C OS=Mus musculus GN=Flnc PE=1 SV=3                                           | 2.22E-11 | 120.3 | 6.5  | 17 (17 0 0 0 0)   | Cytoplasm. Membrane; Peripheral membrane protein. Cytoplasm &° cytoskeleton. Cytoplasm &° myofibril &° sarcomere &° Z line. |
| Q62351 | TFR1_MOUSE Transferrin receptor protein 1 OS=Mus musculus GN=Tfrc PE=1 SV=1                      | 3.97E-12 | 140.2 | 14.8 | 18 (18 0 0 0 0)   | Cell membrane; Single-pass type II membrane protein. Melanosome.                                                            |
| Q9DB77 | QCR2_MOUSE Cytochrome b-c1 complex subunit 2, mitochondrial OS=Mus musculus GN=Uqrc2 PE=1 SV=1   | 3.23E-11 | 140.2 | 30.5 | 19 (19 0 0 0 0)   | Mitochondrion inner membrane; Peripheral membrane protein; Matrix side.                                                     |
| Q3U7R1 | ESYT1_MOUSE Extended synaptotagmin-1 OS=Mus musculus GN=Esy1 PE=2                                | 2.22E-15 | 140.2 | 14.2 | 35 (35 0 0 0 0)   | Membrane; Multi-pass membrane protein.                                                                                      |

*A novel role of mitochondria in muscle injury*

|        |                                                                                          |          |       |      |                 |                                                                                                                                                          |
|--------|------------------------------------------------------------------------------------------|----------|-------|------|-----------------|----------------------------------------------------------------------------------------------------------------------------------------------------------|
|        | SV=2                                                                                     |          |       |      |                 | Endomembrane system; Multi-pass membrane protein.                                                                                                        |
| Q60634 | FLOT2_MOUSE Flotillin-2<br>OS=Mus musculus<br>GN=Flot2 PE=1 SV=2                         | 7.03E-11 | 120.2 | 23.4 | 38 (38 0 0 0 0) | Cell membrane; Peripheral membrane protein. Membrane ° caveola; Peripheral membrane protein. Endosome.                                                   |
| O35129 | PHB2_MOUSE Prohibitin-2<br>OS=Mus musculus<br>GN=Phb2 PE=1 SV=1                          | 9.99E-14 | 130.3 | 50.5 | 34 (34 0 0 0 0) | Mitochondrion inner membrane. Cytoplasm. Nucleus.                                                                                                        |
| P39688 | FYN_MOUSE Proto-oncogene tyrosine-protein kinase Fyn OS=Mus musculus GN=Fyn PE=1 SV=3    | 2.90E-09 | 118.3 | 23.1 | 17 (15 2 0 0 0) | Cell membrane.                                                                                                                                           |
| P26039 | TLN1_MOUSE Talin-1<br>OS=Mus musculus GN=Tln1<br>PE=1 SV=1                               | 5.53E-10 | 130.2 | 6.1  | 23 (23 0 0 0 0) | Cell projection ° ruffle membrane; Peripheral membrane protein; Cytoplasmic side. Cytoplasm ° cytoskeleton.                                              |
| Q61335 | BAP31_MOUSE B-cell receptor-associated protein 31 OS=Mus musculus<br>GN=Bcap31 PE=1 SV=3 | 1.11E-15 | 128.3 | 34.7 | 16 (15 1 0 0 0) | Endoplasmic reticulum membrane; Multi-pass membrane protein. Endoplasmic reticulum-Golgi intermediate compartment membrane; Multi-pass membrane protein. |
| Q07076 | ANXA7_MOUSE Annexin A7 OS=Mus musculus<br>GN=Anxa7 PE=2 SV=1                             | 1.34E-11 | 120.3 | 24.4 | 15 (15 0 0 0 0) | ND                                                                                                                                                       |
| Q922U2 | K2C5_MOUSE Keratin, type II cytoskeletal 5<br>OS=Mus musculus GN=Krt5<br>PE=1 SV=1       | 8.74E-09 | 118.2 | 17.4 | 61 (60 1 0 0 0) | ND                                                                                                                                                       |
| P48962 | ADT1_MOUSE ADP/ATP translocase 1 OS=Mus musculus<br>GN=Slc25a4 PE=1 SV=4                 | 2.19E-11 | 120.3 | 33.6 | 43 (43 0 0 0 0) | Mitochondrion inner membrane; Multi-pass membrane protein.                                                                                               |
| P70206 | PLXA1_MOUSE Plexin-A1<br>OS=Mus musculus<br>GN=Plxna1 PE=1 SV=1                          | 1.49E-11 | 110.3 | 7.1  | 13 (13 0 0 0 0) | Membrane; Single-pass type I membrane protein.                                                                                                           |
| P10107 | ANXA1_MOUSE Annexin A1 OS=Mus musculus<br>GN=Anxa1 PE=1 SV=2                             | 5.50E-11 | 110.3 | 31.5 | 13 (13 0 0 0 0) | Nucleus. Cytoplasm. Cell projection °                                                                                                                    |

|        |                                                                                                    |          |       |      |                 |                                                                                                                                                                               |
|--------|----------------------------------------------------------------------------------------------------|----------|-------|------|-----------------|-------------------------------------------------------------------------------------------------------------------------------------------------------------------------------|
|        |                                                                                                    |          |       |      |                 | cilium. Basolateral cell membrane.                                                                                                                                            |
| Q9WVK4 | EHD1_MOUSE EH domain-containing protein 1<br>OS=Mus musculus<br>GN=Ehd1 PE=1 SV=1                  | 9.98E-10 | 120.2 | 21.0 | 13 (13 0 0 0 0) | Cell membrane; Peripheral membrane protein; Cytoplasmic side. Early endosome membrane; Peripheral membrane protein. Recycling endosome membrane; Peripheral membrane protein. |
| Q9D379 | HYEP_MOUSE Epoxide hydrolase 1 OS=Mus musculus GN=Ephx1 PE=1 SV=1                                  | 5.94E-10 | 120.2 | 26.8 | 15 (15 0 0 0 0) | Microsome membrane; Single-pass type II membrane protein. Endoplasmic reticulum membrane; Single-pass type II membrane protein.                                               |
| Q8CAQ8 | IMMT_MOUSE Mitochondrial inner membrane protein OS=Mus musculus GN=Immt PE=1 SV=1                  | 8.64E-11 | 120.2 | 18.4 | 24 (24 0 0 0 0) | Mitochondrion inner membrane.                                                                                                                                                 |
| Q9EPR5 | SORC2_MOUSE VPS10 domain-containing receptor SorCS2 OS=Mus musculus GN=Sorcs2 PE=1 SV=1            | 2.63E-10 | 110.2 | 10.5 | 19 (19 0 0 0 0) | Membrane; Single-pass type I membrane protein.                                                                                                                                |
| Q60932 | VDAC1_MOUSE Voltage-dependent anion-selective channel protein 1 OS=Mus musculus GN=Vdac1 PE=1 SV=3 | 1.00E-30 | 116.3 | 40.9 | 25 (21 4 0 0 0) | Mitochondrion outer membrane; Multi-pass membrane protein. Cell membrane; Multi-pass membrane protein.                                                                        |
| Q99P72 | RTN4_MOUSE Reticulon-4 OS=Mus musculus GN=Rtn4 PE=1 SV=2                                           | 1.00E-30 | 110.4 | 15.7 | 28 (28 0 0 0 0) | Endoplasmic reticulum membrane; Multi-pass membrane protein.                                                                                                                  |
| Q8R366 | IGSF8_MOUSE Immunoglobulin superfamily member 8 OS=Mus musculus GN=Igsf8 PE=1 SV=2                 | 3.00E-14 | 100.3 | 17.3 | 24 (24 0 0 0 0) | Membrane; Single-pass membrane protein.                                                                                                                                       |
| P08249 | MDHM_MOUSE Malate dehydrogenase, mitochondrial OS=Mus musculus GN=Mdh2 PE=1                        | 1.11E-15 | 110.3 | 40.8 | 28 (28 0 0 0 0) | Mitochondrion matrix.                                                                                                                                                         |

*A novel role of mitochondria in muscle injury*

|        |                                                                                                                     |          |       |      |                    |                                                                                                                                                                                                                                   |
|--------|---------------------------------------------------------------------------------------------------------------------|----------|-------|------|--------------------|-----------------------------------------------------------------------------------------------------------------------------------------------------------------------------------------------------------------------------------|
|        | SV=3                                                                                                                |          |       |      |                    |                                                                                                                                                                                                                                   |
| Q62165 | DAG1_MOUSE<br>Dystroglycan OS=Mus<br>musculus GN=Dag1 PE=1<br>SV=4                                                  | 7.77E-15 | 90.3  | 10.3 | 14 (14 0 0 0<br>0) | Secreted $\hat{\epsilon}^{\circ}$<br>extracellular space.<br>Cell membrane;<br>Single-pass type I<br>membrane protein.<br>Cytoplasm $\hat{\epsilon}^{\circ}$<br>cytoskeleton.<br>Nucleus $\hat{\epsilon}^{\circ}$<br>nucleoplasm. |
| Q9JKF1 | IQGA1_MOUSE Ras<br>GTPase-activating-like<br>protein IQGAP1 OS=Mus<br>musculus GN=Iqgap1 PE=1<br>SV=1               | 5.96E-11 | 110.2 | 8.0  | 14 (14 0 0 0<br>0) | Cell membrane.                                                                                                                                                                                                                    |
| Q9QUR8 | SEM7A_MOUSE<br>Semaphorin-7A OS=Mus<br>musculus GN=Sema7a PE=2<br>SV=1                                              | 1.56E-09 | 90.3  | 17.8 | 13 (13 0 0 0<br>0) | Cell membrane;<br>Lipid-anchor $\hat{\epsilon}^{\circ}$<br>GPI-anchor;<br>Extracellular side.                                                                                                                                     |
| Q6P5E4 | UGGG1_MOUSE UDP-<br>glucose:glycoprotein<br>glucosyltransferase 1<br>OS=Mus musculus<br>GN=Uggt1 PE=1 SV=3          | 6.71E-09 | 110.2 | 7.4  | 11 (11 0 0 0<br>0) | Endoplasmic<br>reticulum lumen.<br>Endoplasmic<br>reticulum-Golgi<br>intermediate<br>compartment.                                                                                                                                 |
| P08752 | GNAI2_MOUSE Guanine<br>nucleotide-binding protein<br>G(i), alpha-2 subunit<br>OS=Mus musculus<br>GN=Gnai2 PE=1 SV=4 | 6.67E-13 | 90.3  | 21.4 | 37 (37 0 0 0<br>0) | Cytoplasm.<br>Cytoplasm $\hat{\epsilon}^{\circ}$<br>cytoskeleton $\hat{\epsilon}^{\circ}$<br>centrosome. Cell<br>membrane.                                                                                                        |
| Q9JKR6 | HYOU1_MOUSE Hypoxia<br>up-regulated protein 1<br>OS=Mus musculus<br>GN=Hyou1 PE=1 SV=1                              | 6.08E-12 | 110.2 | 10.3 | 15 (15 0 0 0<br>0) | Endoplasmic<br>reticulum lumen.                                                                                                                                                                                                   |
| O35516 | NOTC2_MOUSE<br>Neurogenic locus notch<br>homolog protein 2 OS=Mus<br>musculus GN=Notch2 PE=1<br>SV=1                | 2.03E-10 | 90.3  | 4.5  | 14 (14 0 0 0<br>0) | Cell membrane;<br>Single-pass type I<br>membrane protein.<br>Nucleus.                                                                                                                                                             |
| Q02819 | NUCB1_MOUSE<br>Nucleobindin-1 OS=Mus<br>musculus GN=Nucb1 PE=1<br>SV=2                                              | 4.21E-13 | 110.2 | 28.5 | 12 (12 0 0 0<br>0) | Golgi apparatus $\hat{\epsilon}^{\circ}$<br>cis-Golgi network<br>membrane;<br>Peripheral<br>membrane protein;<br>Lumenal side.<br>Cytoplasm.                                                                                      |
| O54890 | ITB3_MOUSE Integrin beta-<br>3 OS=Mus musculus<br>GN=Itgb3 PE=2 SV=1                                                | 6.58E-10 | 90.3  | 11.4 | 15 (15 0 0 0<br>0) | Membrane; Single-<br>pass type I<br>membrane protein.                                                                                                                                                                             |
| Q8BH59 | CMC1_MOUSE Calcium-<br>binding mitochondrial carrier<br>protein Aralar1 OS=Mus<br>musculus GN=Slc25a12              | 1.31E-10 | 108.2 | 17.1 | 11 (10 1 0 0<br>0) | Mitochondrion<br>inner membrane;<br>Multi-pass<br>membrane protein.                                                                                                                                                               |

*A novel role of mitochondria in muscle injury*

|        |                                                                                                                                |          |       |      |                   |                                                                                                                                                                                         |
|--------|--------------------------------------------------------------------------------------------------------------------------------|----------|-------|------|-------------------|-----------------------------------------------------------------------------------------------------------------------------------------------------------------------------------------|
|        | PE=1 SV=1                                                                                                                      |          |       |      |                   |                                                                                                                                                                                         |
| P26231 | CTNA1_MOUSE Catenin alpha-1 OS=Mus musculus GN=Ctnna1 PE=1 SV=1                                                                | 2.03E-12 | 90.2  | 12.3 | 12 (12 0 0 0 0)   | Cytoplasm $\hat{\epsilon}^{\circ}$ cytoskeleton. Cell junction $\hat{\epsilon}^{\circ}$ adherens junction. Cell membrane; Peripheral membrane protein; Cytoplasmic side. Cell junction. |
| P68369 | TBA1A_MOUSE Tubulin alpha-1A chain OS=Mus musculus GN=Tuba1a PE=1 SV=1                                                         | 1.67E-14 | 100.3 | 29.7 | 91 (91 0 0 0 0)   | Cytoplasm $\hat{\epsilon}^{\circ}$ cytoskeleton.                                                                                                                                        |
| P11499 | HS90B_MOUSE Heat shock protein HSP 90-beta OS=Mus musculus GN=Hsp90ab1 PE=1 SV=2                                               | 3.36E-12 | 100.3 | 11.7 | 31 (31 0 0 0 0)   | Cytoplasm. Melanosome.                                                                                                                                                                  |
| Q8VEM8 | MPCP_MOUSE Phosphate carrier protein, mitochondrial OS=Mus musculus GN=Slc25a3 PE=1 SV=1                                       | 9.25E-10 | 100.2 | 21.8 | 43 (43 0 0 0 0)   | Mitochondrion inner membrane; Multi-pass membrane protein.                                                                                                                              |
| P15379 | CD44_MOUSE CD44 antigen OS=Mus musculus GN=Cd44 PE=1 SV=3                                                                      | 2.64E-10 | 90.2  | 8.1  | 93 (93 0 0 0 0)   | Membrane; Single-pass type I membrane protein.                                                                                                                                          |
| Q9CRB9 | CHCH3_MOUSE Coiled-coil-helix-coiled-coil-helix domain-containing protein 3, mitochondrial OS=Mus musculus GN=Chchd3 PE=1 SV=1 | 8.95E-12 | 100.2 | 32.2 | 11 (11 0 0 0 0)   | Mitochondrion inner membrane; Lipid-anchor; Intermembrane side.                                                                                                                         |
| P60710 | ACTB_MOUSE Actin, cytoplasmic 1 OS=Mus musculus GN=Actb PE=1 SV=1                                                              | 7.77E-15 | 88.3  | 16.3 | 218 (211 7 0 0 0) | Cytoplasm $\hat{\epsilon}^{\circ}$ cytoskeleton.                                                                                                                                        |
| Q9D024 | CC47_MOUSE Coiled-coil domain-containing protein 47 OS=Mus musculus GN=Ccdc47 PE=2 SV=2                                        | 9.31E-07 | 100.2 | 15.9 | 13 (13 0 0 0 0)   | Membrane; Single-pass membrane protein.                                                                                                                                                 |
| Q9EQP2 | EHD4_MOUSE EH domain-containing protein 4 OS=Mus musculus GN=Ehd4 PE=1 SV=1                                                    | 1.09E-07 | 100.2 | 18.1 | 10 (10 0 0 0 0)   | Early endosome membrane; Peripheral membrane protein. Recycling endosome membrane; Peripheral membrane protein.                                                                         |
| Q60875 | ARHG2_MOUSE Rho guanine nucleotide exchange factor 2 OS=Mus musculus GN=Arhgef2 PE=1 SV=3                                      | 2.38E-09 | 100.2 | 8.3  | 14 (14 0 0 0 0)   | Cytoplasm. Cell junction $\hat{\epsilon}^{\circ}$ tight junction. Golgi apparatus. Cytoplasm $\hat{\epsilon}^{\circ}$                                                                   |



|        |                                                                                                                       |          |      |      |                 |                                                                                                                                                               |
|--------|-----------------------------------------------------------------------------------------------------------------------|----------|------|------|-----------------|---------------------------------------------------------------------------------------------------------------------------------------------------------------|
|        |                                                                                                                       |          |      |      |                 | cytoskeleton &° spindle.                                                                                                                                      |
| P08551 | NFL_MOUSE Neurofilament light polypeptide OS=Mus musculus GN=Nefl PE=1 SV=5                                           | 5.11E-12 | 80.2 | 14.9 | 8 (8 0 0 0 0)   | ND                                                                                                                                                            |
| O35887 | CALU_MOUSE Calumenin OS=Mus musculus GN=Calu PE=1 SV=1                                                                | 8.88E-15 | 90.3 | 33.7 | 15 (15 0 0 0 0) | Endoplasmic reticulum lumen. Melanosome. Sarcoplasmic reticulum lumen. Secreted.                                                                              |
| Q04736 | YES_MOUSE Proto-oncogene tyrosine-protein kinase Yes OS=Mus musculus GN=Yes1 PE=1 SV=3                                | 2.04E-12 | 80.2 | 20.7 | 9 (9 0 0 0 0)   | Cytoplasm &° cytosol.                                                                                                                                         |
| Q91VD9 | NDUS1_MOUSE NADH-ubiquinone oxidoreductase 75 kDa subunit, mitochondrial OS=Mus musculus GN=Ndufs1 PE=1 SV=1          | 6.47E-10 | 90.2 | 11.7 | 11 (11 0 0 0 0) | Mitochondrion inner membrane.                                                                                                                                 |
| Q05793 | PGBM_MOUSE Basement membrane-specific heparan sulfate proteoglycan core protein OS=Mus musculus GN=Hspg2 PE=1 SV=1    | 1.63E-10 | 80.2 | 2.1  | 8 (8 0 0 0 0)   | Secreted &° extracellular space &° extracellular matrix &° basement membrane.                                                                                 |
| Q60715 | P4HA1_MOUSE Prolyl 4-hydroxylase subunit alpha-1 OS=Mus musculus GN=P4ha1 PE=2 SV=2                                   | 4.12E-12 | 90.2 | 18.9 | 14 (14 0 0 0 0) | Endoplasmic reticulum lumen.                                                                                                                                  |
| Q91YQ5 | RPN1_MOUSE Dolichyl-diphosphooligosaccharide--protein glycosyltransferase subunit 1 OS=Mus musculus GN=Rpn1 PE=2 SV=1 | 1.89E-12 | 90.2 | 18.4 | 27 (27 0 0 0 0) | Endoplasmic reticulum membrane; Single-pass type I membrane protein. Melanosome.                                                                              |
| Q8VDZ4 | ZDHC5_MOUSE Probable palmitoyltransferase ZDHHC5 OS=Mus musculus GN=Zdhhc5 PE=1 SV=1                                  | 4.44E-15 | 70.4 | 16.8 | 11 (11 0 0 0 0) | Membrane; Multi-pass membrane protein.                                                                                                                        |
| Q03145 | EPHA2_MOUSE Ephrin type-A receptor 2 OS=Mus musculus GN=Epha2 PE=1 SV=2                                               | 4.95E-09 | 90.2 | 7.7  | 12 (12 0 0 0 0) | Cell membrane; Single-pass type I membrane protein. Cell projection &° ruffle membrane; Single-pass type I membrane protein. Cell projection &° lamellipodium |

*A novel role of mitochondria in muscle injury*

|        |                                                                                                 |          |      |      |                 |                                                                                                                                                                                                                                                                                   |
|--------|-------------------------------------------------------------------------------------------------|----------|------|------|-----------------|-----------------------------------------------------------------------------------------------------------------------------------------------------------------------------------------------------------------------------------------------------------------------------------|
|        |                                                                                                 |          |      |      |                 | membrane; Single-pass type I membrane protein. Cell junction &° focal adhesion.                                                                                                                                                                                                   |
| Q61739 | ITA6_MOUSE Integrin alpha-6 OS=Mus musculus GN=Itga6 PE=1 SV=2                                  | 2.55E-14 | 70.3 | 8.3  | 8 (8 0 0 0 0)   | Membrane; Single-pass type I membrane protein.                                                                                                                                                                                                                                    |
| Q9CZ13 | QCR1_MOUSE Cytochrome b-c1 complex subunit 1, mitochondrial OS=Mus musculus GN=Uqcrc1 PE=1 SV=1 | 1.33E-14 | 80.3 | 13.3 | 17 (17 0 0 0 0) | Mitochondrion inner membrane.                                                                                                                                                                                                                                                     |
| Q99K10 | ACON_MOUSE Aconitate hydratase, mitochondrial OS=Mus musculus GN=Aco2 PE=1 SV=1                 | 8.22E-14 | 80.3 | 13.8 | 24 (24 0 0 0 0) | Mitochondrion.                                                                                                                                                                                                                                                                    |
| Q9Z0P4 | PALM_MOUSE Paralemmin OS=Mus musculus GN=Palm PE=1 SV=1                                         | 8.65E-11 | 70.3 | 22.2 | 17 (17 0 0 0 0) | Cell membrane; Lipid-anchor; Cytoplasmic side. Cell projection &° filopodium membrane; Lipid-anchor. Cell projection &° axon. Cell projection &° dendrite. Cell projection &° dendritic spine. Basolateral cell membrane; Lipid-anchor. Apicolateral cell membrane; Lipid-anchor. |
| Q7TPR4 | ACTN1_MOUSE Alpha-actinin-1 OS=Mus musculus GN=Actn1 PE=2 SV=1                                  | 1.86E-09 | 70.2 | 9.8  | 10 (10 0 0 0 0) | Cytoplasm &° cytoskeleton. Cytoplasm &° myofibril &° sarcomere &° Z line. Cell membrane. Cell projection &° ruffle.                                                                                                                                                               |
| P63321 | RALA_MOUSE Ras-related protein Ral-A OS=Mus musculus GN=Rala PE=1 SV=1                          | 2.59E-11 | 80.3 | 30.6 | 11 (11 0 0 0 0) | Cell surface. Cell membrane; Lipid-anchor; Cytoplasmic side. Cleavage furrow. Midbody.                                                                                                                                                                                            |
| P07356 | ANXA2_MOUSE Annexin A2 OS=Mus musculus GN=Anxa2 PE=1 SV=2                                       | 8.73E-09 | 80.2 | 24.5 | 30 (30 0 0 0 0) | Secreted &° extracellular space &° extracellular matrix &°                                                                                                                                                                                                                        |

|        |                                                                                                                  |          |      |      |                 |                                                                                                                                                                                         |
|--------|------------------------------------------------------------------------------------------------------------------|----------|------|------|-----------------|-----------------------------------------------------------------------------------------------------------------------------------------------------------------------------------------|
|        |                                                                                                                  |          |      |      |                 | basement membrane.<br>Melanosome.                                                                                                                                                       |
| P17809 | GTR1_MOUSE Solute carrier family 2, facilitated glucose transporter member 1 OS=Mus musculus GN=Slc2a1 PE=1 SV=3 | 6.07E-11 | 80.2 | 9.3  | 39 (39 0 0 0 0) | Cell membrane; Multi-pass membrane protein. Melanosome.                                                                                                                                 |
| P50544 | ACADV_MOUSE Very long-chain specific acyl-CoA dehydrogenase, mitochondrial OS=Mus musculus GN=Acadv1 PE=1 SV=3   | 9.87E-12 | 80.2 | 13.6 | 8 (8 0 0 0 0)   | Mitochondrion inner membrane.                                                                                                                                                           |
| Q61595 | KTN1_MOUSE Kinectin OS=Mus musculus GN=Ktn1 PE=1 SV=1                                                            | 1.72E-07 | 80.2 | 6.8  | 10 (10 0 0 0 0) | Endoplasmic reticulum membrane; Single-pass type II membrane protein.                                                                                                                   |
| P18572 | BASI_MOUSE Basigin OS=Mus musculus GN=Bsg PE=1 SV=2                                                              | 2.09E-08 | 80.2 | 18.0 | 22 (22 0 0 0 0) | Cell membrane; Single-pass type I membrane protein. Melanosome.                                                                                                                         |
| Q8VHY0 | CSPG4_MOUSE Chondroitin sulfate proteoglycan 4 OS=Mus musculus GN=Cspg4 PE=1 SV=2                                | 1.04E-08 | 70.2 | 3.5  | 8 (8 0 0 0 0)   | Apical cell membrane; Single-pass type I membrane protein; Extracellular side. Cell projection &#x2190 lamellipodium membrane; Single-pass type I membrane protein; Extracellular side. |
| O08795 | GLU2B_MOUSE Glucosidase 2 subunit beta OS=Mus musculus GN=Prkcsh PE=1 SV=1                                       | 8.72E-11 | 80.2 | 10.0 | 10 (10 0 0 0 0) | Endoplasmic reticulum.                                                                                                                                                                  |
| P15864 | H12_MOUSE Histone H1.2 OS=Mus musculus GN=Hist1h1c PE=1 SV=2                                                     | 2.31E-11 | 68.2 | 19.8 | 8 (7 1 0 0 0)   | Nucleus. Chromosome.                                                                                                                                                                    |
| P61979 | HNRPK_MOUSE Heterogeneous nuclear ribonucleoprotein K OS=Mus musculus GN=Hnrpk PE=1 SV=1                         | 1.12E-11 | 60.3 | 17.7 | 6 (6 0 0 0 0)   | Cytoplasm. Nucleus &#x2190 nucleoplasm.                                                                                                                                                 |
| P02535 | K1C10_MOUSE Keratin, type I cytoskeletal 10 OS=Mus musculus GN=Krt10 PE=1 SV=3                                   | 7.79E-10 | 80.2 | 11.1 | 85 (85 0 0 0 0) | ND                                                                                                                                                                                      |
| P39061 | CO1A1_MOUSE Collagen alpha-1(XVIII) chain OS=Mus musculus GN=Col18a1 PE=1 SV=4                                   | 4.77E-13 | 80.2 | 5.5  | 8 (8 0 0 0 0)   | Secreted &#x2190 extracellular space &#x2190 extracellular matrix.                                                                                                                      |

*A novel role of mitochondria in muscle injury*

|        |                                                                                                                                      |          |      |      |                 |                                                                                                                     |
|--------|--------------------------------------------------------------------------------------------------------------------------------------|----------|------|------|-----------------|---------------------------------------------------------------------------------------------------------------------|
| P05202 | AATM_MOUSE Aspartate aminotransferase, mitochondrial OS=Mus musculus GN=Got2 PE=1 SV=1                                               | 2.10E-08 | 80.2 | 16.5 | 14 (14 0 0 0 0) | Mitochondrion matrix. Cell membrane.                                                                                |
| Q99MN9 | PCCB_MOUSE Propionyl-CoA carboxylase beta chain, mitochondrial OS=Mus musculus GN=Pccb PE=1 SV=1                                     | 1.46E-11 | 60.3 | 14.8 | 8 (8 0 0 0 0)   | Mitochondrion matrix.                                                                                               |
| Q9Z0M6 | CD97_MOUSE CD97 antigen OS=Mus musculus GN=Cd97 PE=1 SV=2                                                                            | 1.15E-13 | 60.3 | 11.0 | 15 (15 0 0 0 0) | Cell membrane; Multi-pass membrane protein.                                                                         |
| Q9ERE2 | KRT81_MOUSE Keratin, type II cuticular Hb1 (Fragment) OS=Mus musculus GN=Krt81 PE=2 SV=1                                             | 8.48E-07 | 80.2 | 15.1 | 25 (25 0 0 0 0) | ND                                                                                                                  |
| P54761 | EPHB4_MOUSE Ephrin type-B receptor 4 OS=Mus musculus GN=Ephb4 PE=1 SV=1                                                              | 7.77E-15 | 60.3 | 8.4  | 6 (6 0 0 0 0)   | Membrane; Single-pass type I membrane protein.                                                                      |
| P68372 | TBB2C_MOUSE Tubulin beta-2C chain OS=Mus musculus GN=Tubb2c PE=1 SV=1                                                                | 1.48E-11 | 78.2 | 14.2 | 56 (55 1 0 0 0) | Cytoplasm &° cytoskeleton.                                                                                          |
| Q3V0J1 | AL2S4_MOUSE Amyotrophic lateral sclerosis 2 chromosomal region candidate gene 4 protein homolog OS=Mus musculus GN=Als2cr4 PE=2 SV=1 | 9.63E-13 | 60.3 | 19.9 | 10 (10 0 0 0 0) | Membrane; Multi-pass membrane protein.                                                                              |
| O09044 | SNP23_MOUSE Synaptosomal-associated protein 23 OS=Mus musculus GN=Snap23 PE=1 SV=1                                                   | 1.59E-12 | 70.3 | 29.5 | 8 (8 0 0 0 0)   | Cell membrane; Peripheral membrane protein. Cell membrane; Lipid-anchor. Cell junction &° synapse &° synaptosome.   |
| Q9JL15 | LEG8_MOUSE Galectin-8 OS=Mus musculus GN=Lgals8 PE=2 SV=1                                                                            | 9.11E-11 | 60.2 | 20.3 | 8 (8 0 0 0 0)   | Cytoplasm.                                                                                                          |
| O54724 | PTRF_MOUSE Polymerase I and transcript release factor OS=Mus musculus GN=Ptrf PE=1 SV=1                                              | 1.40E-10 | 70.2 | 18.6 | 9 (9 0 0 0 0)   | Membrane &° caveola. Cell membrane. Microsome. Endoplasmic reticulum. Cytoplasm &° cytosol. Mitochondrion. Nucleus. |

|        |                                                                                                             |          |      |      |                 |                                                                                                                                                    |
|--------|-------------------------------------------------------------------------------------------------------------|----------|------|------|-----------------|----------------------------------------------------------------------------------------------------------------------------------------------------|
| Q9WV55 | VAPA_MOUSE Vesicle-associated membrane protein-associated protein A<br>OS=Mus musculus<br>GN=Vapa PE=1 SV=2 | 3.40E-13 | 70.2 | 25.7 | 41 (41 0 0 0 0) | Endoplasmic reticulum membrane; Single-pass type IV membrane protein.                                                                              |
| Q9R0K7 | AT2B2_MOUSE Plasma membrane calcium-transporting ATPase 2<br>OS=Mus musculus<br>GN=Atp2b2 PE=1 SV=2         | 2.38E-09 | 70.2 | 7.3  | 23 (23 0 0 0 0) | Cell membrane; Multi-pass membrane protein.                                                                                                        |
| Q9WVM1 | RGAP1_MOUSE Rac GTPase-activating protein 1<br>OS=Mus musculus<br>GN=Racgap1 PE=2 SV=1                      | 8.99E-09 | 60.2 | 9.6  | 11 (11 0 0 0 0) | Nucleus.<br>Cytoplasm.<br>Cytoplasmic vesicle<br>secretory vesicle<br>acrosome.                                                                    |
| Q01705 | NOTC1_MOUSE Neurogenic locus notch homolog protein 1<br>OS=Mus musculus<br>GN=Notch1 PE=1 SV=2              | 3.42E-09 | 60.2 | 2.3  | 6 (6 0 0 0 0)   | Cell membrane; Single-pass type I membrane protein.<br>Nucleus.                                                                                    |
| Q921F2 | TADBP_MOUSE TAR DNA-binding protein 43<br>OS=Mus musculus<br>GN=Tardbp PE=1 SV=1                            | 8.10E-14 | 70.2 | 17.9 | 13 (13 0 0 0 0) | Nucleus.                                                                                                                                           |
| Q9WTY4 | AQP5_MOUSE Aquaporin-5<br>OS=Mus musculus<br>GN=Aqp5 PE=2 SV=1                                              | 7.69E-08 | 60.2 | 19.2 | 13 (13 0 0 0 0) | Membrane; Multi-pass membrane protein.                                                                                                             |
| Q62371 | DDR2_MOUSE Discoidin domain-containing receptor 2<br>OS=Mus musculus<br>GN=Ddr2 PE=2 SV=2                   | 9.54E-08 | 60.2 | 8.3  | 6 (6 0 0 0 0)   | Cell membrane; Single-pass type I membrane protein.                                                                                                |
| P10126 | EF1A1_MOUSE Elongation factor 1-alpha 1<br>OS=Mus musculus<br>GN=Eef1a1 PE=1 SV=3                           | 9.44E-08 | 70.2 | 14.1 | 41 (41 0 0 0 0) | Cytoplasm.                                                                                                                                         |
| P35822 | PTPRK_MOUSE Receptor-type tyrosine-protein phosphatase kappa<br>OS=Mus musculus<br>GN=Ptpk PE=1 SV=1        | 6.45E-07 | 60.2 | 4.3  | 8 (8 0 0 0 0)   | Membrane; Single-pass type I membrane protein.                                                                                                     |
| P53994 | RAB2A_MOUSE Ras-related protein Rab-2A<br>OS=Mus musculus<br>GN=Rab2a PE=1 SV=1                             | 2.78E-12 | 70.2 | 37.7 | 20 (20 0 0 0 0) | Endoplasmic reticulum-Golgi intermediate compartment membrane; Lipid-anchor.<br>Melanosome.<br>Endoplasmic reticulum membrane; Lipid-anchor. Golgi |

*A novel role of mitochondria in muscle injury*

|        |                                                                                                                |          |      |      |                  |                                                                                                                                                                                       |
|--------|----------------------------------------------------------------------------------------------------------------|----------|------|------|------------------|---------------------------------------------------------------------------------------------------------------------------------------------------------------------------------------|
|        |                                                                                                                |          |      |      |                  | apparatus membrane; Lipid-anchor.                                                                                                                                                     |
| Q68FD5 | CLH_MOUSE Clathrin heavy chain 1 OS=Mus musculus GN=Cltc PE=1 SV=3                                             | 8.22E-11 | 60.2 | 4.1  | 6 (6 0 0 0 0)    | Cytoplasmic vesicle membrane; Peripheral membrane protein; Cytoplasmic side. Membrane $\hat{\epsilon}^{\circ}$ coated pit; Peripheral membrane protein; Cytoplasmic side. Melanosome. |
| P35278 | RAB5C_MOUSE Ras-related protein Rab-5C OS=Mus musculus GN=Rab5c PE=1 SV=2                                      | 3.46E-09 | 70.2 | 34.7 | 12 (12 0 0 0 0)  | Cell membrane; Lipid-anchor; Cytoplasmic side. Early endosome membrane; Lipid-anchor. Melanosome.                                                                                     |
| Q922J9 | FACR1_MOUSE Fatty acyl-CoA reductase 1 OS=Mus musculus GN=Far1 PE=1 SV=1                                       | 3.97E-09 | 70.2 | 16.3 | 14 (14 0 0 0 0)  | Peroxisome membrane; Single-pass membrane protein.                                                                                                                                    |
| P24369 | PIIB_MOUSE Peptidyl-prolyl cis-trans isomerase B OS=Mus musculus GN=Ppib PE=2 SV=2                             | 5.43E-11 | 70.2 | 31.9 | 10 (10 0 0 0 0)  | Endoplasmic reticulum lumen. Melanosome.                                                                                                                                              |
| P80318 | TCPG_MOUSE T-complex protein 1 subunit gamma OS=Mus musculus GN=Cct3 PE=1 SV=1                                 | 3.76E-06 | 60.2 | 12.7 | 8 (8 0 0 0 0)    | Cytoplasm.                                                                                                                                                                            |
| Q64521 | GPDM_MOUSE Glycerol-3-phosphate dehydrogenase, mitochondrial OS=Mus musculus GN=Gpd2 PE=1 SV=2                 | 6.81E-09 | 70.2 | 8.3  | 15 (15 0 0 0 0)  | Mitochondrion inner membrane.                                                                                                                                                         |
| P62270 | RS18_MOUSE 40S ribosomal protein S18 OS=Mus musculus GN=Rps18 PE=2 SV=3                                        | 7.89E-09 | 70.2 | 30.3 | 14 (14 0 0 0 0)  | Cytoplasm.                                                                                                                                                                            |
| Q8BFZ3 | ACTBL_MOUSE Beta-actin-like protein 2 OS=Mus musculus GN=Actbl2 PE=2 SV=1                                      | 1.00E-30 | 50.3 | 18.9 | 84 (15 68 1 0 0) | Cytoplasm $\hat{\epsilon}^{\circ}$ cytoskeleton.                                                                                                                                      |
| O35598 | ADA10_MOUSE Disintegrin and metalloproteinase domain-containing protein 10 OS=Mus musculus GN=Adam10 PE=1 SV=1 | 3.67E-08 | 70.2 | 10.1 | 7 (7 0 0 0 0)    | Membrane; Single-pass type I membrane protein.                                                                                                                                        |

*A novel role of mitochondria in muscle injury*

|        |                                                                                                      |          |      |      |                 |                                                                                                           |
|--------|------------------------------------------------------------------------------------------------------|----------|------|------|-----------------|-----------------------------------------------------------------------------------------------------------|
| Q61490 | CD166_MOUSE CD166 antigen OS=Mus musculus GN=Alcam PE=1 SV=3                                         | 3.88E-08 | 70.2 | 10.6 | 12 (12 0 0 0 0) | Membrane; Single-pass type I membrane protein.                                                            |
| Q3UEB3 | PUF60_MOUSE Poly(U)-binding-splicing factor PUF60 OS=Mus musculus GN=Puf60 PE=2 SV=2                 | 4.18E-11 | 50.3 | 15.4 | 7 (7 0 0 0 0)   | Nucleus.                                                                                                  |
| Q99JY0 | ECHB_MOUSE Trifunctional enzyme subunit beta, mitochondrial OS=Mus musculus GN=Hadhb PE=1 SV=1       | 1.19E-05 | 70.2 | 13.1 | 7 (7 0 0 0 0)   | Mitochondrion matrix.                                                                                     |
| P80314 | TCPB_MOUSE T-complex protein 1 subunit beta OS=Mus musculus GN=Cct2 PE=1 SV=4                        | 4.54E-13 | 50.3 | 13.6 | 6 (6 0 0 0 0)   | Cytoplasm.                                                                                                |
| P82347 | SGCD_MOUSE Delta-sarcoglycan OS=Mus musculus GN=Sgcd PE=1 SV=1                                       | 1.49E-09 | 50.2 | 21.1 | 11 (11 0 0 0 0) | Cell membrane â€° sarcolemma; Single-pass type II membrane protein. Cytoplasm â€° cytoskeleton.           |
| Q9DBS1 | TMM43_MOUSE Transmembrane protein 43 OS=Mus musculus GN=Tmem43 PE=1 SV=1                             | 6.11E-14 | 68.2 | 20.0 | 12 (11 1 0 0 0) | Endoplasmic reticulum. Nucleus inner membrane; Multi-pass membrane protein.                               |
| P18872 | GNAO_MOUSE Guanine nucleotide-binding protein G(o) subunit alpha OS=Mus musculus GN=Gnao1 PE=1 SV=3  | 5.90E-11 | 50.2 | 17.2 | 9 (9 0 0 0 0)   | ND                                                                                                        |
| P62821 | RAB1A_MOUSE Ras-related protein Rab-1A OS=Mus musculus GN=Rab1A PE=1 SV=3                            | 4.40E-11 | 68.2 | 28.3 | 13 (12 1 0 0 0) | Golgi apparatus. Endoplasmic reticulum.                                                                   |
| P97384 | ANX11_MOUSE Annexin A11 OS=Mus musculus GN=Anxa11 PE=1 SV=1                                          | 1.49E-09 | 68.2 | 13.7 | 12 (9 3 0 0 0)  | Cytoplasm. Melanosome. Nucleus envelope. Nucleus â€° nucleoplasm. Cytoplasm â€° cytoskeleton â€° spindle. |
| P61161 | ARP2_MOUSE Actin-related protein 2 OS=Mus musculus GN=Actr2 PE=1 SV=1                                | 3.05E-11 | 50.2 | 10.4 | 5 (5 0 0 0 0)   | Cytoplasm â€° cytoskeleton. Cell projection.                                                              |
| Q9Z127 | LAT1_MOUSE Large neutral amino acids transporter small subunit 1 OS=Mus musculus GN=Slc7a5 PE=1 SV=1 | 8.11E-11 | 50.2 | 8.6  | 10 (10 0 0 0 0) | Cytoplasm â€° cytosol. Apical cell membrane; Multi-pass membrane protein.                                 |

*A novel role of mitochondria in muscle injury*

|        |                                                                                                   |          |      |      |                 |                                                                                                            |
|--------|---------------------------------------------------------------------------------------------------|----------|------|------|-----------------|------------------------------------------------------------------------------------------------------------|
| Q9CQD1 | RAB5A_MOUSE Ras-related protein Rab-5A<br>OS=Mus musculus<br>GN=Rab5a PE=1 SV=1                   | 1.26E-06 | 66.2 | 29.3 | 10 (7 3 0 0 0)  | Cell membrane; Lipid-anchor; Cytoplasmic side. Early endosome membrane; Lipid-anchor. Melanosome.          |
| Q61765 | K1H1_MOUSE Keratin, type I cuticular Ha1<br>OS=Mus musculus<br>GN=Krt31 PE=2 SV=2                 | 1.34E-07 | 66.2 | 16.3 | 7 (5 2 0 0 0)   | ND                                                                                                         |
| Q8R464 | CADM4_MOUSE Cell adhesion molecule 4<br>OS=Mus musculus<br>GN=Cadm4 PE=1 SV=1                     | 2.48E-09 | 50.2 | 14.9 | 6 (6 0 0 0 0)   | Membrane; Single-pass type I membrane protein.                                                             |
| P17156 | HSP72_MOUSE Heat shock-related 70 kDa protein 2<br>OS=Mus musculus<br>GN=Hspa2 PE=1 SV=1          | 1.00E-30 | 60.3 | 8.5  | 33 (33 0 0 0 0) | ND                                                                                                         |
| Q91V61 | SFXN3_MOUSE Sideroflexin-3<br>OS=Mus musculus GN=Sfxn3 PE=1 SV=1                                  | 1.98E-11 | 60.3 | 24.6 | 6 (6 0 0 0 0)   | Mitochondrion membrane; Multi-pass membrane protein.                                                       |
| Q9EPK2 | XRP2_MOUSE Protein XRP2<br>OS=Mus musculus GN=Rp2 PE=2 SV=3                                       | 2.68E-09 | 50.2 | 9.5  | 11 (11 0 0 0 0) | Cell membrane; Lipid-anchor; Cytoplasmic side.                                                             |
| P97855 | G3BP1_MOUSE Ras GTPase-activating protein-binding protein 1<br>OS=Mus musculus GN=G3bp1 PE=1 SV=1 | 1.11E-15 | 60.3 | 15.5 | 6 (6 0 0 0 0)   | Cytoplasm. Cytoplasm &cytosol. Cell membrane. Nucleus.                                                     |
| Q9JIM1 | S29A1_MOUSE Equilibrative nucleoside transporter 1<br>OS=Mus musculus GN=Slc29a1 PE=1 SV=3        | 2.89E-14 | 60.3 | 12.4 | 17 (17 0 0 0 0) | Basolateral cell membrane; Multi-pass membrane protein. Apical cell membrane; Multi-pass membrane protein. |
| Q9WTS6 | TEN3_MOUSE Teneurin-3<br>OS=Mus musculus GN=Odz3 PE=1 SV=1                                        | 2.77E-06 | 50.2 | 1.8  | 6 (6 0 0 0 0)   | Membrane; Single-pass type II membrane protein.                                                            |
| P97807 | FUMH_MOUSE Fumarate hydratase, mitochondrial<br>OS=Mus musculus GN=Fh PE=1 SV=2                   | 3.53E-11 | 60.3 | 13.0 | 8 (8 0 0 0 0)   | Mitochondrion. Cytoplasm.                                                                                  |
| Q01853 | TERA_MOUSE Transitional endoplasmic reticulum ATPase<br>OS=Mus musculus GN=Vcp PE=1 SV=4          | 2.20E-09 | 50.2 | 5.5  | 5 (5 0 0 0 0)   | Cytoplasm &cytosol. Nucleus.                                                                               |
| P57776 | EF1D_MOUSE Elongation factor 1-delta<br>OS=Mus musculus GN=Eef1d PE=1 SV=3                        | 6.29E-09 | 50.2 | 26.3 | 7 (7 0 0 0 0)   | ND                                                                                                         |



*A novel role of mitochondria in muscle injury*

|        |                                                                                          |          |      |      |                 |                                                                                                    |
|--------|------------------------------------------------------------------------------------------|----------|------|------|-----------------|----------------------------------------------------------------------------------------------------|
| Q99JB2 | STML2_MOUSE Stomatin-like protein 2 OS=Mus musculus GN=Stoml2 PE=1 SV=1                  | 1.07E-12 | 60.3 | 22.9 | 7 (7 0 0 0 0)   | Membrane; Peripheral membrane protein. Cytoplasm. Cytoplasm $\hat{\epsilon}^{\circ}$ cytoskeleton. |
| Q61576 | FKB10_MOUSE FK506-binding protein 10 OS=Mus musculus GN=Fkbp10 PE=1 SV=1                 | 3.76E-10 | 60.2 | 10.7 | 8 (8 0 0 0 0)   | Endoplasmic reticulum lumen.                                                                       |
| P16858 | G3P_MOUSE Glyceraldehyde-3-phosphate dehydrogenase OS=Mus musculus GN=Gapdh PE=1 SV=2    | 4.61E-10 | 48.2 | 19.5 | 8 (7 1 0 0 0)   | Cytoplasm $\hat{\epsilon}^{\circ}$ cytosol. Nucleus.                                               |
| Q80X50 | UBP2L_MOUSE Ubiquitin-associated protein 2-like OS=Mus musculus GN=Ubp2l PE=1 SV=1       | 2.45E-08 | 60.2 | 6.4  | 7 (7 0 0 0 0)   | ND                                                                                                 |
| Q02013 | AQP1_MOUSE Aquaporin-1 OS=Mus musculus GN=Aqp1 PE=1 SV=3                                 | 1.67E-14 | 40.3 | 17.8 | 26 (26 0 0 0 0) | Membrane; Multi-pass membrane protein.                                                             |
| P51150 | RAB7A_MOUSE Ras-related protein Rab-7a OS=Mus musculus GN=Rab7a PE=1 SV=2                | 9.61E-12 | 60.2 | 33.3 | 28 (28 0 0 0 0) | Late endosome. Lysosome. Cytoplasmic vesicle $\hat{\epsilon}^{\circ}$ phagosome. Melanosome.       |
| Q05186 | RCN1_MOUSE Reticulocalbin-1 OS=Mus musculus GN=Rcn1 PE=1 SV=1                            | 1.33E-10 | 60.2 | 22.2 | 9 (9 0 0 0 0)   | Endoplasmic reticulum lumen.                                                                       |
| Q3TTY5 | K22E_MOUSE Keratin, type II cytoskeletal 2 epidermal OS=Mus musculus GN=Krt2 PE=1 SV=1   | 1.86E-08 | 60.2 | 6.2  | 35 (35 0 0 0 0) | ND                                                                                                 |
| P80316 | TCPE_MOUSE T-complex protein 1 subunit epsilon OS=Mus musculus GN=Cct5 PE=1 SV=1         | 1.14E-10 | 40.3 | 10.9 | 5 (5 0 0 0 0)   | Cytoplasm. Cytoplasm $\hat{\epsilon}^{\circ}$ cytoskeleton $\hat{\epsilon}^{\circ}$ centrosome.    |
| P70452 | STX4_MOUSE Syntaxin-4 OS=Mus musculus GN=Stx4 PE=1 SV=1                                  | 9.11E-09 | 60.2 | 25.8 | 6 (6 0 0 0 0)   | Cell membrane; Single-pass type IV membrane protein.                                               |
| P80317 | TCPZ_MOUSE T-complex protein 1 subunit zeta OS=Mus musculus GN=Cct6a PE=1 SV=3           | 2.12E-13 | 40.3 | 10.9 | 5 (5 0 0 0 0)   | Cytoplasm.                                                                                         |
| O35737 | HNRH1_MOUSE Heterogeneous nuclear ribonucleoprotein H OS=Mus musculus GN=Hnrh1 PE=1 SV=3 | 5.98E-09 | 40.3 | 13.4 | 7 (7 0 0 0 0)   | Nucleus $\hat{\epsilon}^{\circ}$ nucleoplasm.                                                      |
| P62492 | RB11A_MOUSE Ras-related protein Rab-11A OS=Mus musculus                                  | 3.02E-10 | 60.2 | 25.5 | 17 (17 0 0 0 0) | Cell membrane; Peripheral membrane protein.                                                        |

|        |                                                                                                          |          |      |      |                 |                                                                                               |
|--------|----------------------------------------------------------------------------------------------------------|----------|------|------|-----------------|-----------------------------------------------------------------------------------------------|
|        | GN=Rab11a PE=1 SV=3                                                                                      |          |      |      |                 | Recycling endosome membrane; Peripheral membrane protein.                                     |
| P51174 | ACADL_MOUSE Long-chain specific acyl-CoA dehydrogenase, mitochondrial OS=Mus musculus GN=Acadl PE=2 SV=2 | 6.94E-09 | 60.2 | 14.0 | 7 (7 0 0 0 0)   | Mitochondrion matrix.                                                                         |
| P80315 | TCPD_MOUSE T-complex protein 1 subunit delta OS=Mus musculus GN=Cct4 PE=1 SV=3                           | 3.02E-12 | 40.3 | 10.9 | 4 (4 0 0 0 0)   | Cytoplasm. Melanosome. Cytoplasm $\hat{a}^{\circ}$ cytoskeleton $\hat{a}^{\circ}$ centrosome. |
| P51881 | ADT2_MOUSE ADP/ATP translocase 2 OS=Mus musculus GN=Slc25a5 PE=1 SV=3                                    | 4.11E-09 | 60.2 | 16.1 | 45 (42 3 0 0 0) | Mitochondrion inner membrane; Multi-pass membrane protein.                                    |
| P62908 | RS3_MOUSE 40S ribosomal protein S3 OS=Mus musculus GN=Rps3 PE=1 SV=1                                     | 6.88E-08 | 60.2 | 23.5 | 7 (7 0 0 0 0)   | Cytoplasm.                                                                                    |
| P11984 | TCPA1_MOUSE T-complex protein 1 subunit alpha A OS=Mus musculus GN=Tcp1 PE=1 SV=2                        | 5.44E-14 | 40.2 | 9.2  | 4 (4 0 0 0 0)   | #N/A                                                                                          |
| P26443 | DHE3_MOUSE Glutamate dehydrogenase 1, mitochondrial OS=Mus musculus GN=Glud1 PE=1 SV=1                   | 2.98E-09 | 60.2 | 11.5 | 8 (8 0 0 0 0)   | Mitochondrion matrix.                                                                         |
| Q99K48 | NONO_MOUSE Non-POU domain-containing octamer-binding protein OS=Mus musculus GN=Nono PE=1 SV=3           | 4.84E-11 | 40.2 | 13.5 | 4 (4 0 0 0 0)   | Nucleus.                                                                                      |
| Q99JY9 | ARP3_MOUSE Actin-related protein 3 OS=Mus musculus GN=Actr3 PE=1 SV=3                                    | 3.08E-06 | 40.2 | 10.5 | 5 (5 0 0 0 0)   | Cytoplasm $\hat{a}^{\circ}$ cytoskeleton. Cell projection.                                    |
| Q3TZZ7 | ESYT2_MOUSE Extended synaptotagmin-2 OS=Mus musculus GN=Esyt2 PE=1 SV=1                                  | 9.62E-10 | 60.2 | 8.8  | 7 (7 0 0 0 0)   | Cell membrane; Multi-pass membrane protein.                                                   |
| P15331 | PERL_MOUSE Peripherin OS=Mus musculus GN=Prph PE=1 SV=2                                                  | 5.15E-08 | 40.2 | 4.8  | 74 (74 0 0 0 0) | ND                                                                                            |
| Q7TQ95 | LNP_MOUSE Protein lunapark OS=Mus musculus GN=Lnp PE=1 SV=1                                              | 3.70E-08 | 60.2 | 15.1 | 8 (8 0 0 0 0)   | Membrane; Multi-pass membrane protein.                                                        |
| P53690 | MMP14_MOUSE Matrix metalloproteinase-14 OS=Mus musculus                                                  | 1.24E-08 | 40.2 | 7.6  | 4 (4 0 0 0 0)   | Membrane; Single-pass type I membrane protein;                                                |

|        |                                                                                                     |          |      |      |                 |                                                        |
|--------|-----------------------------------------------------------------------------------------------------|----------|------|------|-----------------|--------------------------------------------------------|
|        | GN=Mmp14 PE=2 SV=2                                                                                  |          |      |      |                 | Extracellular side.<br>Melanosome.                     |
| A2APV2 | FMNL2_MOUSE Formin-like protein 2 OS=Mus musculus GN=Fmnl2 PE=2 SV=2                                | 8.64E-09 | 40.2 | 4.3  | 4 (4 0 0 0 0)   | Cytoplasm.                                             |
| Q99KE1 | MAOM_MOUSE NAD-dependent malic enzyme, mitochondrial OS=Mus musculus GN=Me2 PE=2 SV=1               | 1.16E-06 | 60.2 | 10.5 | 6 (6 0 0 0 0)   | Mitochondrion matrix.                                  |
| P14869 | RLA0_MOUSE 60S acidic ribosomal protein P0 OS=Mus musculus GN=Rplp0 PE=1 SV=3                       | 6.66E-07 | 40.2 | 19.9 | 6 (6 0 0 0 0)   | Nucleus.<br>Cytoplasm.                                 |
| Q6P9J9 | ANO6_MOUSE Anoctamin-6 OS=Mus musculus GN=Ano6 PE=1 SV=1                                            | 2.73E-08 | 60.2 | 7.1  | 10 (10 0 0 0 0) | Membrane; Multi-pass membrane protein.                 |
| Q8BHN3 | GANAB_MOUSE Neutral alpha-glucosidase AB OS=Mus musculus GN=Ganab PE=1 SV=1                         | 4.28E-07 | 60.1 | 6.1  | 7 (7 0 0 0 0)   | Endoplasmic reticulum. Golgi apparatus.<br>Melanosome. |
| P50446 | K2C6A_MOUSE Keratin, type II cytoskeletal 6A OS=Mus musculus GN=Krt6a PE=2 SV=3                     | 1.73E-05 | 40.2 | 4.3  | 4 (4 0 0 0 0)   | ND                                                     |
| Q60930 | VDAC2_MOUSE Voltage-dependent anion-selective channel protein 2 OS=Mus musculus GN=Vdac2 PE=1 SV=2  | 8.10E-14 | 58.2 | 19.0 | 14 (12 2 0 0 0) | Mitochondrion outer membrane.                          |
| Q8VI59 | PCX3_MOUSE Pecanex-like protein 3 OS=Mus musculus GN=Pcnx3 PE=1 SV=2                                | 1.39E-06 | 40.2 | 1.8  | 5 (5 0 0 0 0)   | Membrane; Multi-pass membrane protein.                 |
| Q99JR1 | SFXN1_MOUSE Sideroflexin-1 OS=Mus musculus GN=Sfxn1 PE=1 SV=3                                       | 3.65E-08 | 58.2 | 22.7 | 7 (6 1 0 0 0)   | Mitochondrion membrane; Multi-pass membrane protein.   |
| Q61879 | MYH10_MOUSE Myosin-10 OS=Mus musculus GN=Myh10 PE=1 SV=2                                            | 1.56E-12 | 50.3 | 3.1  | 10 (10 0 0 0 0) | ND                                                     |
| P42932 | TCPQ_MOUSE T-complex protein 1 subunit theta OS=Mus musculus GN=Cct8 PE=1 SV=3                      | 1.00E-07 | 40.2 | 7.8  | 5 (5 0 0 0 0)   | Cytoplasm.<br>Cytoplasmic centrosome.                  |
| Q91ZV3 | DCBD2_MOUSE Discoidin, CUB and LCCL domain-containing protein 2 OS=Mus musculus GN=Dcbld2 PE=2 SV=1 | 2.03E-10 | 40.2 | 5.2  | 5 (5 0 0 0 0)   | Membrane; Single-pass type I membrane protein.         |
| O08749 | DLDH_MOUSE Dihydrolipoyl dehydrogenase,                                                             | 6.66E-15 | 50.3 | 11.2 | 6 (6 0 0 0 0)   | Mitochondrion matrix.                                  |

|        |                                                                                                         |          |      |      |                 |                                                                                                                     |
|--------|---------------------------------------------------------------------------------------------------------|----------|------|------|-----------------|---------------------------------------------------------------------------------------------------------------------|
|        | mitochondrial OS=Mus musculus GN=Dld PE=1 SV=2                                                          |          |      |      |                 |                                                                                                                     |
| Q8K2K6 | AGFG1_MOUSE Arf-GAP domain and FG repeats-containing protein 1 OS=Mus musculus GN=Agfg1 PE=1 SV=2       | 1.59E-09 | 50.3 | 11.6 | 7 (7 0 0 0 0)   | Nucleus. Cytoplasmic vesicle.                                                                                       |
| P80313 | TCPH_MOUSE T-complex protein 1 subunit eta OS=Mus musculus GN=Cct7 PE=1 SV=1                            | 1.11E-15 | 30.3 | 7.2  | 4 (4 0 0 0 0)   | Cytoplasm.                                                                                                          |
| Q80W54 | FACE1_MOUSE CAAX prenyl protease 1 homolog OS=Mus musculus GN=Zmpste24 PE=1 SV=2                        | 4.32E-13 | 50.3 | 10.1 | 7 (7 0 0 0 0)   | Endoplasmic reticulum membrane; Multi-pass membrane protein. Golgi apparatus membrane; Multi-pass membrane protein. |
| P97333 | NRP1_MOUSE Neuropilin-1 OS=Mus musculus GN=Nrp1 PE=1 SV=1                                               | 1.56E-11 | 30.3 | 5.7  | 3 (3 0 0 0 0)   | Membrane; Single-pass type I membrane protein.                                                                      |
| Q9Z2K1 | K1C16_MOUSE Keratin, type I cytoskeletal 16 OS=Mus musculus GN=Krt16 PE=1 SV=3                          | 2.11E-14 | 30.3 | 9.2  | 4 (4 0 0 0 0)   | ND                                                                                                                  |
| Q8BMD8 | SCMC1_MOUSE Calcium-binding mitochondrial carrier protein SCaMC-1 OS=Mus musculus GN=Slc25a24 PE=2 SV=1 | 1.20E-10 | 50.3 | 12.4 | 10 (10 0 0 0 0) | Mitochondrion inner membrane; Multi-pass membrane protein.                                                          |
| B0V2N1 | PTPRS_MOUSE Receptor-type tyrosine-protein phosphatase S OS=Mus musculus GN=Ptpns PE=2 SV=1             | 1.67E-09 | 30.3 | 3.0  | 3 (3 0 0 0 0)   | Membrane; Single-pass type I membrane protein.                                                                      |
| P10810 | CD14_MOUSE Monocyte differentiation antigen CD14 OS=Mus musculus GN=Cd14 PE=1 SV=1                      | 2.22E-14 | 30.3 | 10.7 | 4 (4 0 0 0 0)   | Cell membrane; Lipid-anchor &#x2013; GPI-anchor.                                                                    |
| P62991 | UBIQ_MOUSE Ubiquitin OS=Mus musculus GN=Rps27a PE=1 SV=1                                                | 9.22E-10 | 50.2 | 61.8 | 50 (50 0 0 0 0) | #N/A                                                                                                                |
| Q01721 | GAS1_MOUSE Growth arrest-specific protein 1 OS=Mus musculus GN=Gas1 PE=2 SV=2                           | 7.11E-13 | 30.3 | 17.8 | 3 (3 0 0 0 0)   | Cell membrane; Lipid-anchor &#x2013; GPI-anchor.                                                                    |
| Q922Q8 | LRC59_MOUSE Leucine-rich repeat-containing protein 59 OS=Mus musculus GN=Lrrc59 PE=2 SV=1               | 4.05E-10 | 50.2 | 16.9 | 22 (22 0 0 0 0) | Microsome membrane; Single-pass type II membrane protein. Endoplasmic reticulum                                     |

|        |                                                                                                                                                          |          |      |      |                 |                                                                            |
|--------|----------------------------------------------------------------------------------------------------------------------------------------------------------|----------|------|------|-----------------|----------------------------------------------------------------------------|
|        |                                                                                                                                                          |          |      |      |                 | membrane; Single-pass type II membrane protein.                            |
| P53986 | MOT1_MOUSE<br>Monocarboxylate transporter 1 OS=Mus musculus<br>GN=Slc16a1 PE=1 SV=1                                                                      | 2.15E-13 | 50.2 | 13.4 | 12 (12 0 0 0 0) | Cell membrane; Multi-pass membrane protein.                                |
| P97370 | AT1B3_MOUSE<br>Sodium/potassium-transporting ATPase subunit beta-3 OS=Mus musculus<br>GN=Atp1b3 PE=1 SV=1                                                | 9.49E-11 | 30.2 | 11.9 | 8 (8 0 0 0 0)   | Membrane; Single-pass type II membrane protein. Melanosome.                |
| Q8BKE6 | CP20A_MOUSE<br>Cytochrome P450 20A1 OS=Mus musculus<br>GN=Cyp20a1 PE=2 SV=1                                                                              | 7.87E-11 | 50.2 | 10.8 | 5 (5 0 0 0 0)   | Membrane; Single-pass membrane protein.                                    |
| Q91VR2 | ATPG_MOUSE ATP synthase subunit gamma, mitochondrial OS=Mus musculus GN=Atp5c1 PE=1 SV=1                                                                 | 2.29E-10 | 50.2 | 17.1 | 6 (6 0 0 0 0)   | Mitochondrion. Mitochondrion inner membrane; Peripheral membrane protein.  |
| P26645 | MARCS_MOUSE<br>Myristoylated alanine-rich C-kinase substrate OS=Mus musculus GN=Marcks PE=1 SV=2                                                         | 4.57E-10 | 50.2 | 18.1 | 12 (12 0 0 0 0) | Cytoplasm $\hat{\text{e}}^{\circ}$ cytoskeleton. Membrane; Lipid-anchor.   |
| P19096 | FAS_MOUSE Fatty acid synthase OS=Mus musculus GN=Fasn PE=1 SV=2                                                                                          | 3.27E-08 | 30.2 | 1.4  | 3 (3 0 0 0 0)   | Cytoplasm. Melanosome.                                                     |
| Q8BMF4 | ODP2_MOUSE<br>Dihydrolipoyllysine-residue acetyltransferase component of pyruvate dehydrogenase complex, mitochondrial OS=Mus musculus GN=Dlat PE=1 SV=2 | 1.11E-15 | 50.2 | 10.0 | 9 (9 0 0 0 0)   | Mitochondrion matrix.                                                      |
| P21278 | GNA11_MOUSE Guanine nucleotide-binding protein subunit alpha-11 OS=Mus musculus GN=Gna11 PE=1 SV=1                                                       | 1.11E-10 | 50.2 | 17.0 | 9 (9 0 0 0 0)   | Cell membrane; Lipid-anchor.                                               |
| Q8BHL4 | RAI3_MOUSE Retinoic acid-induced protein 3 OS=Mus musculus<br>GN=Gprc5a PE=2 SV=1                                                                        | 6.38E-12 | 30.2 | 7.6  | 24 (24 0 0 0 0) | Cell membrane; Multi-pass membrane protein.                                |
| Q3U9G9 | LBR_MOUSE Lamin-B receptor OS=Mus musculus<br>GN=Lbr PE=1 SV=2                                                                                           | 2.92E-10 | 50.2 | 6.9  | 5 (5 0 0 0 0)   | Nucleus inner membrane; Multi-pass membrane protein.                       |
| P35456 | UPAR_MOUSE Urokinase plasminogen activator surface receptor OS=Mus musculus GN=Plaur PE=2 SV=1                                                           | 3.85E-09 | 30.2 | 6.7  | 12 (12 0 0 0 0) | Cell membrane; Lipid-anchor $\hat{\text{e}}^{\circ}$ GPI-anchor. Secreted. |

|        |                                                                                                                                               |          |      |      |                    |                                                                                   |
|--------|-----------------------------------------------------------------------------------------------------------------------------------------------|----------|------|------|--------------------|-----------------------------------------------------------------------------------|
| Q8BR92 | PALM2_MOUSE<br>Paralemmin-2 OS=Mus<br>musculus GN=Paln2 PE=1<br>SV=1                                                                          | 1.53E-09 | 30.2 | 12.8 | 3 (3 0 0 0 0)      | Cell membrane;<br>Lipid-anchor;<br>Cytoplasmic side.                              |
| P59326 | YTHD1_MOUSE YTH<br>domain family protein 1<br>OS=Mus musculus<br>GN=Ythdf1 PE=2 SV=1                                                          | 2.26E-11 | 50.2 | 11.1 | 7 (7 0 0 0 0)      | ND                                                                                |
| O54734 | OST48_MOUSE Dolichyl-<br>diphosphooligosaccharide--<br>protein glycosyltransferase<br>48 kDa subunit OS=Mus<br>musculus GN=Ddost PE=1<br>SV=1 | 1.12E-07 | 50.2 | 9.3  | 10 (10 0 0 0<br>0) | Endoplasmic<br>reticulum<br>membrane; Single-<br>pass type I<br>membrane protein. |
| Q9CQQ7 | AT5F1_MOUSE ATP<br>synthase subunit b,<br>mitochondrial OS=Mus<br>musculus GN=Atp5f1 PE=1<br>SV=1                                             | 2.04E-08 | 50.2 | 13.7 | 6 (6 0 0 0 0)      | Mitochondrion.<br>Mitochondrion<br>inner membrane.                                |
| Q3V3R1 | C1TM_MOUSE<br>Monofunctional C1-<br>tetrahydrofolate synthase,<br>mitochondrial OS=Mus<br>musculus GN=Mthfd11 PE=1<br>SV=2                    | 4.35E-10 | 50.2 | 4.1  | 7 (7 0 0 0 0)      | Mitochondrion.                                                                    |
| Q61FX2 | K1C42_MOUSE Keratin,<br>type I cytoskeletal 42<br>OS=Mus musculus<br>GN=Krt42 PE=1 SV=1                                                       | 2.23E-06 | 30.2 | 6.9  | 4 (4 0 0 0 0)      | Cytoplasm.                                                                        |
| P97300 | NPTN_MOUSE<br>Neuroplastin OS=Mus<br>musculus GN=Nptn PE=1<br>SV=2                                                                            | 2.97E-08 | 50.2 | 16.4 | 14 (14 0 0 0<br>0) | Cell membrane;<br>Single-pass type I<br>membrane protein.                         |
| P47963 | RL13_MOUSE 60S<br>ribosomal protein L13<br>OS=Mus musculus<br>GN=Rpl13 PE=2 SV=3                                                              | 3.13E-09 | 50.2 | 20.9 | 9 (9 0 0 0 0)      | ND                                                                                |
| Q9CRD0 | OCAD1_MOUSE OCIA<br>domain-containing protein 1<br>OS=Mus musculus<br>GN=Ociad1 PE=1 SV=1                                                     | 3.81E-07 | 50.2 | 17.0 | 5 (5 0 0 0 0)      | Endosome.                                                                         |
| P11440 | CDC2_MOUSE Cell<br>division control protein 2<br>homolog OS=Mus musculus<br>GN=Cdc2 PE=1 SV=3                                                 | 1.57E-09 | 30.2 | 13.1 | 3 (3 0 0 0 0)      | Nucleus.                                                                          |
| Q9DBH5 | LMAN2_MOUSE Vesicular<br>integral-membrane protein<br>VIP36 OS=Mus musculus<br>GN=Lman2 PE=2 SV=1                                             | 2.36E-10 | 50.2 | 13.4 | 6 (6 0 0 0 0)      | Golgi apparatus<br>membrane; Single-<br>pass type I<br>membrane protein.          |
| Q9WTR5 | CAD13_MOUSE Cadherin-<br>13 OS=Mus musculus<br>GN=Cdh13 PE=2 SV=1                                                                             | 1.77E-09 | 30.2 | 5.2  | 5 (5 0 0 0 0)      | Cell membrane;<br>Lipid-anchor &acirc;<br>GPI-anchor.                             |
| P57716 | NICA_MOUSE Nicastrin<br>OS=Mus musculus<br>GN=Nestn PE=1 SV=2                                                                                 | 4.25E-07 | 50.2 | 7.6  | 9 (9 0 0 0 0)      | Membrane; Single-<br>pass type I<br>membrane protein.                             |

*A novel role of mitochondria in muscle injury*

|        |                                                                                                                             |          |      |      |                 |                                                                                                      |
|--------|-----------------------------------------------------------------------------------------------------------------------------|----------|------|------|-----------------|------------------------------------------------------------------------------------------------------|
|        |                                                                                                                             |          |      |      |                 | Melanosome.                                                                                          |
| O88207 | CO5A1_MOUSE Collagen alpha-1(V) chain OS=Mus musculus GN=Col5a1 PE=2 SV=2                                                   | 7.95E-09 | 30.2 | 2.2  | 3 (3 0 0 0 0)   | Secreted $\hat{\epsilon}^{\circ}$ extracellular space $\hat{\epsilon}^{\circ}$ extracellular matrix. |
| P48678 | LMNA_MOUSE Lamin-A/C OS=Mus musculus GN=Lmna PE=1 SV=2                                                                      | 4.16E-09 | 50.2 | 8.9  | 5 (5 0 0 0 0)   | Nucleus. Nucleus envelope.                                                                           |
| P29341 | PABP1_MOUSE Polyadenylate-binding protein 1 OS=Mus musculus GN=Pabpc1 PE=1 SV=1                                             | 3.20E-10 | 50.2 | 7.2  | 7 (7 0 0 0 0)   | Cytoplasm. Nucleus.                                                                                  |
| P58252 | EF2_MOUSE Elongation factor 2 OS=Mus musculus GN=Eef2 PE=1 SV=2                                                             | 2.26E-07 | 30.1 | 3.1  | 3 (3 0 0 0 0)   | Cytoplasm.                                                                                           |
| P47753 | CAZA1_MOUSE F-actin-capping protein subunit alpha-1 OS=Mus musculus GN=Capza1 PE=1 SV=4                                     | 3.09E-10 | 30.1 | 14.0 | 4 (4 0 0 0 0)   | Cytoplasm $\hat{\epsilon}^{\circ}$ cytoskeleton.                                                     |
| P62751 | RL23A_MOUSE 60S ribosomal protein L23a OS=Mus musculus GN=Rpl23a PE=2 SV=1                                                  | 3.24E-07 | 50.2 | 32.1 | 5 (5 0 0 0 0)   | ND                                                                                                   |
| P46978 | STT3A_MOUSE Dolichyl-diphosphooligosaccharide--protein glycosyltransferase subunit STT3A OS=Mus musculus GN=Stt3a PE=1 SV=1 | 1.33E-07 | 50.2 | 5.5  | 10 (10 0 0 0 0) | Endoplasmic reticulum membrane; Multi-pass membrane protein.                                         |
| Q01149 | CO1A2_MOUSE Collagen alpha-2(I) chain OS=Mus musculus GN=Col1a2 PE=2 SV=2                                                   | 8.65E-08 | 30.1 | 2.6  | 4 (4 0 0 0 0)   | Secreted $\hat{\epsilon}^{\circ}$ extracellular space $\hat{\epsilon}^{\circ}$ extracellular matrix. |
| P35279 | RAB6A_MOUSE Ras-related protein Rab-6A OS=Mus musculus GN=Rab6a PE=1 SV=4                                                   | 2.04E-07 | 50.2 | 18.3 | 6 (6 0 0 0 0)   | Golgi apparatus membrane; Lipid-anchor.                                                              |
| P14824 | ANXA6_MOUSE Annexin A6 OS=Mus musculus GN=Anxa6 PE=1 SV=2                                                                   | 9.22E-07 | 30.1 | 4.3  | 3 (3 0 0 0 0)   | Cytoplasm. Melanosome.                                                                               |
| Q9CQY5 | MAGT1_MOUSE Magnesium transporter protein 1 OS=Mus musculus GN=Magt1 PE=2 SV=1                                              | 1.40E-06 | 50.2 | 14.3 | 6 (6 0 0 0 0)   | Endoplasmic reticulum membrane; Multi-pass membrane protein.                                         |
| Q91YT0 | NDUV1_MOUSE NADH dehydrogenase [ubiquinone] flavoprotein 1, mitochondrial OS=Mus musculus GN=Ndufv1 PE=1 SV=1               | 1.73E-08 | 50.2 | 9.3  | 7 (7 0 0 0 0)   | Mitochondrion inner membrane; Peripheral membrane protein; Matrix side.                              |
| Q64487 | PTPRD_MOUSE Receptor-type tyrosine-protein phosphatase delta OS=Mus musculus GN=Ptprd PE=2                                  | 2.15E-09 | 28.3 | 2.2  | 4 (3 1 0 0 0)   | Membrane; Single-pass type I membrane protein.                                                       |

*A novel role of mitochondria in muscle injury*

|        |                                                                                                               |          |      |      |                 |                                                                                                                                                                                                       |
|--------|---------------------------------------------------------------------------------------------------------------|----------|------|------|-----------------|-------------------------------------------------------------------------------------------------------------------------------------------------------------------------------------------------------|
|        | SV=2                                                                                                          |          |      |      |                 |                                                                                                                                                                                                       |
| O35435 | PYRD_MOUSE Dihydroorotate dehydrogenase, mitochondrial OS=Mus musculus GN=Dhodh PE=2 SV=2                     | 2.92E-06 | 50.2 | 12.7 | 5 (5 0 0 0 0)   | Mitochondrion inner membrane; Single-pass membrane protein.                                                                                                                                           |
| P62874 | GBB1_MOUSE Guanine nucleotide-binding protein G(I)/G(S)/G(T) subunit beta-1 OS=Mus musculus GN=Gnb1 PE=1 SV=3 | 7.99E-08 | 50.2 | 12.4 | 6 (6 0 0 0 0)   | ND                                                                                                                                                                                                    |
| Q61390 | TCPW_MOUSE T-complex protein 1 subunit zeta-2 OS=Mus musculus GN=Cct6b PE=2 SV=4                              | 1.72E-07 | 28.2 | 8.1  | 3 (2 1 0 0 0)   | Cytoplasm.                                                                                                                                                                                            |
| Q8JZQ9 | EIF3B_MOUSE Eukaryotic translation initiation factor 3 subunit B OS=Mus musculus GN=Eif3b PE=1 SV=1           | 4.96E-08 | 50.2 | 5.0  | 5 (5 0 0 0 0)   | Cytoplasm.                                                                                                                                                                                            |
| P30999 | CTND1_MOUSE Catenin delta-1 OS=Mus musculus GN=Ctnnd1 PE=1 SV=2                                               | 6.17E-08 | 50.1 | 5.0  | 20 (20 0 0 0 0) | Cytoplasm. Nucleus. Cell membrane.                                                                                                                                                                    |
| Q64337 | SQSTM_MOUSE Sequestosome-1 OS=Mus musculus GN=Sqstm1 PE=1 SV=1                                                | 1.25E-10 | 20.3 | 5.9  | 4 (4 0 0 0 0)   | Cytoplasm. Late endosome. Nucleus.                                                                                                                                                                    |
| O70318 | E41L2_MOUSE Band 4.1-like protein 2 OS=Mus musculus GN=Epb4112 PE=1 SV=1                                      | 1.07E-08 | 48.2 | 5.5  | 7 (4 3 0 0 0)   | Cytoplasm &° cytoskeleton.                                                                                                                                                                            |
| P70168 | IMB1_MOUSE Importin subunit beta-1 OS=Mus musculus GN=Kpnb1 PE=1 SV=1                                         | 2.68E-09 | 20.3 | 3.1  | 2 (2 0 0 0 0)   | Cytoplasm. Nucleus envelope.                                                                                                                                                                          |
| Q9D1G1 | RAB1B_MOUSE Ras-related protein Rab-1B OS=Mus musculus GN=Rab1b PE=1 SV=1                                     | 2.35E-09 | 46.2 | 29.9 | 5 (4 0 1 0 0)   | Membrane; Lipid-anchor; Cytoplasmic side. Cytoplasm.                                                                                                                                                  |
| Q80WJ7 | LYRIC_MOUSE Protein LYRIC OS=Mus musculus GN=Mtdh PE=1 SV=1                                                   | 3.14E-13 | 40.3 | 7.3  | 8 (8 0 0 0 0)   | Endoplasmic reticulum membrane; Single-pass membrane protein. Nucleus membrane; Single-pass membrane protein. Cell junction &° tight junction. Nucleus &° nucleolus. Cytoplasm &° perinuclear region. |



*A novel role of mitochondria in muscle injury*

|        |                                                                                                                                |          |      |      |                 |                                                                                                                                                    |
|--------|--------------------------------------------------------------------------------------------------------------------------------|----------|------|------|-----------------|----------------------------------------------------------------------------------------------------------------------------------------------------|
| P21981 | TGM2_MOUSE Protein-glutamine gamma-glutamyltransferase 2<br>OS=Mus musculus<br>GN=Tgm2 PE=1 SV=4                               | 1.54E-11 | 20.3 | 4.5  | 3 (3 0 0 0 0)   | ND                                                                                                                                                 |
| O35682 | MYADM_MOUSE Myeloid-associated differentiation marker<br>OS=Mus musculus<br>GN=Myadm PE=2 SV=2                                 | 9.19E-12 | 20.3 | 8.4  | 46 (46 0 0 0 0) | Membrane; Multi-pass membrane protein.                                                                                                             |
| P62960 | YBOX1_MOUSE Nuclease-sensitive element-binding protein 1<br>OS=Mus musculus<br>GN=Ybx1 PE=1 SV=3                               | 6.66E-15 | 40.3 | 22.7 | 4 (4 0 0 0 0)   | Cytoplasm. Nucleus. Cytoplasmic granule. Secreted.                                                                                                 |
| P46660 | AINX_MOUSE Alpha-internexin<br>OS=Mus musculus<br>GN=Ina PE=1 SV=2                                                             | 6.54E-09 | 20.2 | 4.0  | 4 (4 0 0 0 0)   | ND                                                                                                                                                 |
| Q8VH51 | RBM39_MOUSE RNA-binding protein 39<br>OS=Mus musculus<br>GN=Rbm39 PE=1 SV=1                                                    | 1.18E-09 | 20.2 | 6.0  | 3 (3 0 0 0 0)   | Nucleus.                                                                                                                                           |
| P62071 | RRAS2_MOUSE Ras-related protein R-Ras2<br>OS=Mus musculus<br>GN=Rras2 PE=1 SV=1                                                | 3.70E-13 | 40.3 | 19.1 | 20 (20 0 0 0 0) | Cell membrane; Lipid-anchor; Cytoplasmic side.                                                                                                     |
| P70670 | NACAM_MOUSE Nascent polypeptide-associated complex subunit alpha, muscle-specific form<br>OS=Mus musculus<br>GN=Naca PE=1 SV=1 | 8.85E-10 | 20.2 | 1.3  | 3 (3 0 0 0 0)   | Cytoplasm. Nucleus.                                                                                                                                |
| Q8BXA1 | GOLI4_MOUSE Golgi integral membrane protein 4<br>OS=Mus musculus<br>GN=Golim4 PE=1 SV=1                                        | 1.77E-08 | 40.2 | 8.2  | 4 (4 0 0 0 0)   | Golgi apparatus <sup>â€</sup> Golgi stack membrane; Single-pass type II membrane protein. Endosome membrane; Single-pass type II membrane protein. |
| Q8BGD9 | IF4B_MOUSE Eukaryotic translation initiation factor 4B<br>OS=Mus musculus<br>GN=Eif4b PE=1 SV=1                                | 3.07E-06 | 20.2 | 5.6  | 2 (2 0 0 0 0)   | ND                                                                                                                                                 |
| Q68FD9 | K1549_MOUSE UPF0606 protein KIAA1549<br>OS=Mus musculus<br>GN=Kiaa1549 PE=1 SV=2                                               | 2.99E-10 | 20.2 | 1.6  | 2 (2 0 0 0 0)   | Membrane; Multi-pass membrane protein.                                                                                                             |
| Q9CZU6 | CISY_MOUSE Citrate synthase, mitochondrial<br>OS=Mus musculus<br>GN=Cs PE=1 SV=1                                               | 1.91E-11 | 40.2 | 8.2  | 11 (11 0 0 0 0) | Mitochondrion matrix.                                                                                                                              |

*A novel role of mitochondria in muscle injury*

|        |                                                                                                                |          |      |      |               |                                                                                                                                                                                                                 |
|--------|----------------------------------------------------------------------------------------------------------------|----------|------|------|---------------|-----------------------------------------------------------------------------------------------------------------------------------------------------------------------------------------------------------------|
| Q6F3F9 | GP126_MOUSE Probable G-protein coupled receptor 126 OS=Mus musculus GN=Gpr126 PE=1 SV=1                        | 1.33E-14 | 20.2 | 2.3  | 4 (4 0 0 0 0) | Cell membrane; Multi-pass membrane protein.                                                                                                                                                                     |
| Q9CRD2 | TTC35_MOUSE Tetratricopeptide repeat protein 35 OS=Mus musculus GN=Ttc35 PE=2 SV=1                             | 6.68E-11 | 40.2 | 19.9 | 5 (5 0 0 0 0) | Nucleus.                                                                                                                                                                                                        |
| P63101 | 1433Z_MOUSE 14-3-3 protein zeta/delta OS=Mus musculus GN=Ywhaz PE=1 SV=1                                       | 2.24E-09 | 20.2 | 10.6 | 2 (2 0 0 0 0) | Cytoplasm. Melanosome.                                                                                                                                                                                          |
| Q9D1M7 | FKB11_MOUSE FK506-binding protein 11 OS=Mus musculus GN=Fkbp11 PE=2 SV=1                                       | 2.36E-12 | 40.2 | 14.4 | 4 (4 0 0 0 0) | Membrane; Single-pass membrane protein.                                                                                                                                                                         |
| Q9QZD8 | DIC_MOUSE Mitochondrial dicarboxylate carrier OS=Mus musculus GN=Slc25a10 PE=2 SV=2                            | 1.68E-07 | 40.2 | 19.5 | 5 (5 0 0 0 0) | Mitochondrion inner membrane; Multi-pass membrane protein.                                                                                                                                                      |
| Q9QXS6 | DREB_MOUSE Drebrin OS=Mus musculus GN=Dbn1 PE=1 SV=4                                                           | 1.65E-11 | 20.2 | 5.4  | 2 (2 0 0 0 0) | Cytoplasm.                                                                                                                                                                                                      |
| Q9DC16 | ERG11_MOUSE Endoplasmic reticulum-Golgi intermediate compartment protein 1 OS=Mus musculus GN=Ergic1 PE=1 SV=1 | 7.21E-13 | 40.2 | 20.3 | 5 (5 0 0 0 0) | Endoplasmic reticulum membrane; Multi-pass membrane protein. Endoplasmic reticulum-Golgi intermediate compartment membrane; Multi-pass membrane protein. Golgi apparatus membrane; Multi-pass membrane protein. |
| Q91V41 | RAB14_MOUSE Ras-related protein Rab-14 OS=Mus musculus GN=Rab14 PE=1 SV=3                                      | 2.28E-08 | 40.2 | 20.0 | 7 (7 0 0 0 0) | Early endosome membrane; Lipid-anchor; Cytoplasmic side. Golgi apparatus membrane; Lipid-anchor; Cytoplasmic side. Golgi apparatus trans-Golgi network membrane; Lipid-anchor; Cytoplasmic side.                |
| P16110 | LEG3_MOUSE Galectin-3                                                                                          | 1.41E-10 | 40.2 | 14.0 | 5 (5 0 0 0 0) | Cytoplasm.                                                                                                                                                                                                      |

*A novel role of mitochondria in muscle injury*

|        |                                                                                                                  |          |      |      |                    |                                                                                                                                                                                                                                                                                                           |
|--------|------------------------------------------------------------------------------------------------------------------|----------|------|------|--------------------|-----------------------------------------------------------------------------------------------------------------------------------------------------------------------------------------------------------------------------------------------------------------------------------------------------------|
|        | OS=Mus musculus<br>GN=Lgals3 PE=1 SV=3                                                                           |          |      |      |                    | Nucleus. Secreted.                                                                                                                                                                                                                                                                                        |
| P14685 | PSMD3_MOUSE 26S<br>proteasome non-ATPase<br>regulatory subunit 3<br>OS=Mus musculus<br>GN=Psm3 PE=2 SV=2         | 1.94E-10 | 20.2 | 5.7  | 2 (2 0 0 0 0)      | ND                                                                                                                                                                                                                                                                                                        |
| Q9DC51 | GNAI3_MOUSE Guanine<br>nucleotide-binding protein<br>G(k) subunit alpha OS=Mus<br>musculus GN=Gnai3 PE=1<br>SV=3 | 4.26E-07 | 20.2 | 7.1  | 5 (5 0 0 0 0)      | Cytoplasm. Cell<br>membrane.<br>Cytoplasmic<br>cytoskeleton<br>centrosome.                                                                                                                                                                                                                                |
| P70696 | H2B1A_MOUSE Histone<br>H2B type 1-A OS=Mus<br>musculus GN=Hist1h2ba<br>PE=2 SV=3                                 | 1.11E-12 | 40.2 | 34.6 | 10 (10 0 0 0<br>0) | Nucleus.<br>Chromosome.                                                                                                                                                                                                                                                                                   |
| P40237 | CD82_MOUSE CD82<br>antigen OS=Mus musculus<br>GN=Cd82 PE=1 SV=1                                                  | 2.29E-06 | 40.2 | 13.2 | 12 (12 0 0 0<br>0) | Membrane; Multi-<br>pass membrane<br>protein.                                                                                                                                                                                                                                                             |
| Q91ZA3 | PCCA_MOUSE Propionyl-<br>CoA carboxylase alpha<br>chain, mitochondrial<br>OS=Mus musculus GN=Pcca<br>PE=2 SV=2   | 8.53E-11 | 20.2 | 4.0  | 3 (3 0 0 0 0)      | Mitochondrion<br>matrix.                                                                                                                                                                                                                                                                                  |
| O08547 | SC22B_MOUSE Vesicle-<br>trafficking protein SEC22b<br>OS=Mus musculus<br>GN=Sec22b PE=1 SV=3                     | 2.18E-10 | 40.2 | 21.4 | 7 (7 0 0 0 0)      | Endoplasmic<br>reticulum-Golgi<br>intermediate<br>compartment<br>membrane; Single-<br>pass type IV<br>membrane protein.<br>Golgi apparatus<br>membrane; Single-<br>pass type IV<br>membrane protein.<br>Endoplasmic<br>reticulum<br>membrane; Single-<br>pass type IV<br>membrane protein.<br>Melanosome. |
| Q8BYK6 | YTHD3_MOUSE YTH<br>domain family protein 3<br>OS=Mus musculus<br>GN=Ythdf3 PE=1 SV=2                             | 1.67E-11 | 40.2 | 8.7  | 7 (7 0 0 0 0)      | ND                                                                                                                                                                                                                                                                                                        |
| Q9WVL3 | S12A7_MOUSE Solute<br>carrier family 12 member 7<br>OS=Mus musculus<br>GN=Slc12a7 PE=1 SV=1                      | 3.29E-09 | 40.2 | 4.9  | 4 (4 0 0 0 0)      | Membrane; Multi-<br>pass membrane<br>protein.                                                                                                                                                                                                                                                             |
| P57759 | ERP29_MOUSE<br>Endoplasmic reticulum<br>protein ERp29 OS=Mus<br>musculus GN=Erp29 PE=1<br>SV=2                   | 1.17E-12 | 40.2 | 17.9 | 5 (5 0 0 0 0)      | Endoplasmic<br>reticulum lumen.<br>Melanosome.                                                                                                                                                                                                                                                            |

*A novel role of mitochondria in muscle injury*

|        |                                                                                                       |          |      |      |               |                                                                             |
|--------|-------------------------------------------------------------------------------------------------------|----------|------|------|---------------|-----------------------------------------------------------------------------|
| Q9QY76 | VAPB_MOUSE Vesicle-associated membrane protein-associated protein B OS=Mus musculus GN=Vapb PE=2 SV=3 | 1.40E-08 | 40.2 | 20.2 | 7 (7 0 0 0 0) | Endoplasmic reticulum membrane; Single-pass type IV membrane protein.       |
| Q9D074 | MGRN1_MOUSE Probable E3 ubiquitin-protein ligase MGRN1 OS=Mus musculus GN=Mgrn1 PE=1 SV=2             | 5.50E-09 | 20.2 | 6.6  | 3 (3 0 0 0 0) | Early endosome. Cytoplasm. Cell membrane. Cytoplasm. Nucleus.               |
| O35609 | SCAM3_MOUSE Secretory carrier-associated membrane protein 3 OS=Mus musculus GN=Scamp3 PE=1 SV=2       | 1.53E-12 | 40.2 | 13.5 | 6 (6 0 0 0 0) | Membrane; Multi-pass membrane protein.                                      |
| Q8K0C4 | CP51A_MOUSE Lanosterol 14-alpha demethylase OS=Mus musculus GN=Cyp51a1 PE=2 SV=1                      | 4.59E-08 | 40.2 | 10.5 | 4 (4 0 0 0 0) | Endoplasmic reticulum membrane. Microsome membrane.                         |
| Q8K224 | NAT10_MOUSE N-acetyltransferase 10 OS=Mus musculus GN=Nat10 PE=2 SV=1                                 | 6.80E-11 | 20.2 | 2.3  | 3 (3 0 0 0 0) | Nucleus â€° nucleolus.                                                      |
| Q9DB20 | ATPO_MOUSE ATP synthase subunit O, mitochondrial OS=Mus musculus GN=Atp5o PE=1 SV=1                   | 7.25E-08 | 40.2 | 22.5 | 5 (5 0 0 0 0) | Mitochondrion. Mitochondrion inner membrane.                                |
| Q9WUM4 | COR1C_MOUSE Coronin-1C OS=Mus musculus GN=Coro1c PE=1 SV=2                                            | 6.56E-07 | 20.2 | 4.9  | 2 (2 0 0 0 0) | ND                                                                          |
| Q9WV32 | ARC1B_MOUSE Actin-related protein 2/3 complex subunit 1B OS=Mus musculus GN=Arpc1b PE=1 SV=3          | 9.08E-10 | 20.2 | 8.3  | 2 (2 0 0 0 0) | Cytoplasm â€° cytoskeleton.                                                 |
| P70227 | ITPR3_MOUSE Inositol 1,4,5-trisphosphate receptor type 3 OS=Mus musculus GN=Itpr3 PE=1 SV=3           | 3.29E-07 | 40.2 | 2.0  | 4 (4 0 0 0 0) | Endoplasmic reticulum membrane; Multi-pass membrane protein.                |
| Q9D8B3 | CHM4B_MOUSE Charged multivesicular body protein 4b OS=Mus musculus GN=Chmp4b PE=2 SV=2                | 4.28E-08 | 20.2 | 11.2 | 2 (2 0 0 0 0) | Cytoplasm â€° cytosol. Late endosome membrane; Peripheral membrane protein. |
| Q9R0A0 | PEX14_MOUSE Peroxisomal membrane protein PEX14 OS=Mus musculus GN=Pex14 PE=1 SV=1                     | 1.23E-10 | 40.2 | 13.3 | 4 (4 0 0 0 0) | Peroxisome membrane; Peripheral membrane protein; Cytoplasmic side.         |
| Q8VIJ6 | SFPQ_MOUSE Splicing factor, proline- and glutamine-rich OS=Mus                                        | 1.65E-04 | 20.2 | 3.7  | 2 (2 0 0 0 0) | Nucleus matrix.                                                             |

*A novel role of mitochondria in muscle injury*

|        |                                                                                                     |          |      |      |               |                                                                                                                       |
|--------|-----------------------------------------------------------------------------------------------------|----------|------|------|---------------|-----------------------------------------------------------------------------------------------------------------------|
|        | musculus GN=Sfpq PE=1 SV=1                                                                          |          |      |      |               |                                                                                                                       |
| Q62465 | VAT1_MOUSE Synaptic vesicle membrane protein VAT-1 homolog OS=Mus musculus GN=Vat1 PE=2 SV=3        | 2.11E-09 | 40.2 | 10.1 | 4 (4 0 0 0 0) | Cytoplasm.                                                                                                            |
| Q61656 | DDX5_MOUSE Probable ATP-dependent RNA helicase DDX5 OS=Mus musculus GN=Ddx5 PE=1 SV=1               | 8.46E-07 | 20.2 | 3.4  | 2 (2 0 0 0 0) | Nucleus &° nucleolus.                                                                                                 |
| P03995 | GFAP_MOUSE Glial fibrillary acidic protein OS=Mus musculus GN=Gfap PE=1 SV=4                        | 7.39E-09 | 20.2 | 4.4  | 8 (8 0 0 0 0) | Cytoplasm.                                                                                                            |
| Q8C7X2 | K0090_MOUSE Uncharacterized protein KIAA0090 OS=Mus musculus GN=Kiaa0090 PE=1 SV=1                  | 3.68E-06 | 40.2 | 4.2  | 6 (6 0 0 0 0) | Membrane; Single-pass type I membrane protein.                                                                        |
| P47740 | AL3A2_MOUSE Fatty aldehyde dehydrogenase OS=Mus musculus GN=Aldh3a2 PE=2 SV=1                       | 3.05E-09 | 40.2 | 11.6 | 4 (4 0 0 0 0) | Endoplasmic reticulum membrane; Single-pass membrane protein; Cytoplasmic side.                                       |
| Q91W90 | TXND5_MOUSE Thioredoxin domain-containing protein 5 OS=Mus musculus GN=Txndc5 PE=1 SV=2             | 7.87E-10 | 40.2 | 11.0 | 7 (7 0 0 0 0) | Endoplasmic reticulum lumen.                                                                                          |
| Q9Z0X1 | AIFM1_MOUSE Apoptosis-inducing factor 1, mitochondrial OS=Mus musculus GN=Aifm1 PE=1 SV=1           | 2.51E-07 | 40.2 | 8.5  | 6 (6 0 0 0 0) | Mitochondrion intermembrane space. Mitochondrion inner membrane. Cytoplasm. Cytoplasm &° perinuclear region. Nucleus. |
| Q91WB7 | UBTD1_MOUSE Ubiquitin domain-containing protein 1 OS=Mus musculus GN=Ubt1 PE=2 SV=1                 | 1.33E-07 | 20.2 | 11.0 | 2 (2 0 0 0 0) | ND                                                                                                                    |
| P50247 | SAHH_MOUSE Adenosylhomocysteinase OS=Mus musculus GN=Ahcy PE=1 SV=3                                 | 8.52E-08 | 20.2 | 5.3  | 2 (2 0 0 0 0) | Cytoplasm. Melanosome.                                                                                                |
| Q9QYA2 | TOM40_MOUSE Mitochondrial import receptor subunit TOM40 homolog OS=Mus musculus GN=Tomm40 PE=1 SV=3 | 2.48E-06 | 40.2 | 9.4  | 4 (4 0 0 0 0) | Mitochondrion outer membrane; Multi-pass membrane protein.                                                            |

|        |                                                                                                                    |          |      |     |                    |                                                                                                                                                         |
|--------|--------------------------------------------------------------------------------------------------------------------|----------|------|-----|--------------------|---------------------------------------------------------------------------------------------------------------------------------------------------------|
| O55143 | AT2A2_MOUSE<br>Sarcoplasmic/endoplasmic<br>reticulum calcium ATPase 2<br>OS=Mus musculus<br>GN=Atp2a2 PE=1 SV=2    | 4.20E-10 | 40.2 | 4.7 | 12 (12 0 0 0<br>0) | Endoplasmic<br>reticulum<br>membrane; Multi-<br>pass membrane<br>protein.<br>Sarcoplasmic<br>reticulum<br>membrane; Multi-<br>pass membrane<br>protein. |
| Q9R233 | TPSN_MOUSE Tapasin<br>OS=Mus musculus<br>GN=Tapbp PE=2 SV=2                                                        | 1.20E-07 | 40.2 | 6.7 | 4 (4 0 0 0 0)      | Endoplasmic<br>reticulum<br>membrane; Single-<br>pass type I<br>membrane protein.                                                                       |
| Q99K28 | ARFG2_MOUSE ADP-<br>ribosylation factor GTPase-<br>activating protein 2 OS=Mus<br>musculus GN=Arfgap2<br>PE=1 SV=1 | 2.10E-08 | 40.2 | 8.1 | 4 (4 0 0 0 0)      | Cytoplasm. Golgi<br>apparatus<br>membrane;<br>Peripheral<br>membrane protein;<br>Cytoplasmic side.                                                      |
| Q9Z247 | FKBP9_MOUSE FK506-<br>binding protein 9 OS=Mus<br>musculus GN=Fkbp9 PE=1<br>SV=1                                   | 5.65E-11 | 40.2 | 8.6 | 5 (5 0 0 0 0)      | Endoplasmic<br>reticulum lumen.                                                                                                                         |
| Q00993 | UFO_MOUSE Tyrosine-<br>protein kinase receptor UFO<br>OS=Mus musculus GN=Axl<br>PE=1 SV=1                          | 1.88E-07 | 20.2 | 2.9 | 2 (2 0 0 0 0)      | Membrane; Single-<br>pass type I<br>membrane protein.                                                                                                   |
| P17710 | HXK1_MOUSE<br>Hexokinase-1 OS=Mus<br>musculus GN=Hk1 PE=1<br>SV=2                                                  | 3.57E-07 | 40.2 | 3.4 | 4 (4 0 0 0 0)      | Mitochondrion<br>outer membrane;<br>Peripheral<br>membrane protein.<br>Membrane.                                                                        |
| Q9CZQ6 | RAE1E_MOUSE Retinoic<br>acid early-inducible protein<br>1-epsilon OS=Mus musculus<br>GN=Rae1e PE=2 SV=1            | 1.00E-05 | 20.2 | 4.8 | 3 (3 0 0 0 0)      | Cell membrane;<br>Lipid-anchor °<br>GPI-anchor.                                                                                                         |
| Q9QYE6 | GOGA5_MOUSE Golgin<br>subfamily A member 5<br>OS=Mus musculus<br>GN=Golga5 PE=1 SV=2                               | 2.65E-07 | 40.2 | 6.0 | 4 (4 0 0 0 0)      | Golgi apparatus<br>membrane; Single-<br>pass type IV<br>membrane protein.                                                                               |
| Q61781 | K1C14_MOUSE Keratin,<br>type I cytoskeletal 14<br>OS=Mus musculus<br>GN=Krt14 PE=1 SV=2                            | 2.96E-10 | 40.2 | 6.8 | 19 (19 0 0 0<br>0) | Cytoplasm.<br>Nucleus.                                                                                                                                  |
| Q8VDM4 | PSMD2_MOUSE 26S<br>proteasome non-ATPase<br>regulatory subunit 2<br>OS=Mus musculus<br>GN=Psm2 PE=1 SV=1           | 2.49E-08 | 20.2 | 3.0 | 2 (2 0 0 0 0)      | ND                                                                                                                                                      |
| P06151 | LDHA_MOUSE L-lactate<br>dehydrogenase A chain<br>OS=Mus musculus<br>GN=Ldha PE=1 SV=3                              | 1.81E-05 | 20.2 | 6.0 | 2 (2 0 0 0 0)      | Cytoplasm.                                                                                                                                              |

*A novel role of mitochondria in muscle injury*

|        |                                                                                                                                                                  |          |      |      |                 |                                                                                                                         |
|--------|------------------------------------------------------------------------------------------------------------------------------------------------------------------|----------|------|------|-----------------|-------------------------------------------------------------------------------------------------------------------------|
| Q9D2G2 | ODO2_MOUSE<br>Dihydrolipoyllysine-residue succinyltransferase component of 2-oxoglutarate dehydrogenase complex, mitochondrial OS=Mus musculus GN=Dlst PE=1 SV=1 | 2.10E-09 | 40.2 | 7.7  | 7 (7 0 0 0 0)   | Mitochondrion.                                                                                                          |
| Q62318 | TIF1B_MOUSE<br>Transcription intermediary factor 1-beta OS=Mus musculus GN=Trim28 PE=1 SV=3                                                                      | 3.67E-09 | 20.2 | 3.8  | 2 (2 0 0 0 0)   | Nucleus.                                                                                                                |
| P56695 | WFS1_MOUSE Wolframin OS=Mus musculus GN=Wfs1 PE=1 SV=1                                                                                                           | 3.80E-05 | 40.2 | 4.6  | 5 (5 0 0 0 0)   | Endoplasmic reticulum membrane; Multi-pass membrane protein.                                                            |
| P97379 | G3BP2_MOUSE Ras GTPase-activating protein-binding protein 2 OS=Mus musculus GN=G3bp2 PE=1 SV=2                                                                   | 2.83E-08 | 40.2 | 8.9  | 5 (5 0 0 0 0)   | ND                                                                                                                      |
| P62806 | H4_MOUSE Histone H4 OS=Mus musculus GN=Hist1h4a PE=1 SV=2                                                                                                        | 2.78E-08 | 40.2 | 38.8 | 6 (6 0 0 0 0)   | Nucleus.<br>Chromosome.                                                                                                 |
| Q9QZD9 | EIF3I_MOUSE Eukaryotic translation initiation factor 3 subunit I OS=Mus musculus GN=Eif3i PE=1 SV=1                                                              | 3.57E-07 | 20.2 | 8.6  | 2 (2 0 0 0 0)   | Cytoplasm.                                                                                                              |
| Q9D6R2 | IDH3A_MOUSE Isocitrate dehydrogenase [NAD] subunit alpha, mitochondrial OS=Mus musculus GN=Idh3a PE=1 SV=1                                                       | 8.15E-10 | 40.2 | 8.5  | 13 (13 0 0 0 0) | Mitochondrion.                                                                                                          |
| P05064 | ALDOA_MOUSE Fructose-bisphosphate aldolase A OS=Mus musculus GN=Aldoa PE=1 SV=2                                                                                  | 2.85E-07 | 20.2 | 6.3  | 3 (3 0 0 0 0)   | ND                                                                                                                      |
| P02469 | LAMB1_MOUSE Laminin subunit beta-1 OS=Mus musculus GN=Lamb1-1 PE=1 SV=2                                                                                          | 1.26E-06 | 40.2 | 2.1  | 4 (4 0 0 0 0)   | Secreted $\hat{\epsilon}$ extracellular space $\hat{\epsilon}$ extracellular matrix $\hat{\epsilon}$ basement membrane. |
| P29758 | OAT_MOUSE Ornithine aminotransferase, mitochondrial OS=Mus musculus GN=Oat PE=1 SV=1                                                                             | 1.67E-09 | 40.2 | 7.3  | 5 (5 0 0 0 0)   | Mitochondrion matrix.                                                                                                   |
| P24452 | CAPG_MOUSE Macrophage-capping protein OS=Mus musculus GN=Capg PE=1 SV=2                                                                                          | 9.11E-10 | 20.2 | 7.7  | 2 (2 0 0 0 0)   | Nucleus.<br>Cytoplasm.<br>Secreted.<br>Melanosome.                                                                      |
| P56959 | FUS_MOUSE RNA-binding                                                                                                                                            | 3.18E-08 | 20.2 | 4.4  | 2 (2 0 0 0 0)   | Nucleus.                                                                                                                |

|        |                                                                                              |          |      |      |                  |                                                                                                                                                                                                                 |
|--------|----------------------------------------------------------------------------------------------|----------|------|------|------------------|-----------------------------------------------------------------------------------------------------------------------------------------------------------------------------------------------------------------|
|        | protein FUS OS=Mus musculus GN=Fus PE=2 SV=1                                                 |          |      |      |                  |                                                                                                                                                                                                                 |
| P68433 | H31_MOUSE Histone H3.1 OS=Mus musculus GN=Hist1h3a PE=1 SV=2                                 | 1.70E-08 | 40.1 | 23.5 | 4 (4 0 0 0 0)    | Nucleus.<br>Chromosome.                                                                                                                                                                                         |
| Q6IFZ6 | K2C1B_MOUSE Keratin, type II cytoskeletal 1b OS=Mus musculus GN=Krt77 PE=1 SV=1              | 1.31E-09 | 38.2 | 5.4  | 54 (53 1 0 0 0)  | ND                                                                                                                                                                                                              |
| Q9R0Y5 | KAD1_MOUSE Adenylate kinase isoenzyme 1 OS=Mus musculus GN=Ak1 PE=1 SV=1                     | 1.16E-06 | 20.2 | 11.3 | 4 (4 0 0 0 0)    | Cytoplasm.                                                                                                                                                                                                      |
| O08602 | RAE1A_MOUSE Retinoic acid early-inducible protein 1-alpha OS=Mus musculus GN=Rae1a PE=1 SV=1 | 8.11E-08 | 20.2 | 4.7  | 5 (5 0 0 0 0)    | Cell membrane;<br>Lipid-anchor $\hat{\epsilon}^{\circ}$<br>GPI-anchor.                                                                                                                                          |
| Q8R317 | UBQL1_MOUSE Ubiquilin-1 OS=Mus musculus GN=Ubqln1 PE=1 SV=1                                  | 1.99E-05 | 38.2 | 7.0  | 4 (3 1 0 0 0)    | Nucleus.<br>Cytoplasm.                                                                                                                                                                                          |
| P35951 | LDLR_MOUSE Low-density lipoprotein receptor OS=Mus musculus GN=Ldlr PE=1 SV=1                | 3.22E-06 | 20.2 | 3.6  | 2 (2 0 0 0 0)    | Cell membrane;<br>Single-pass type I membrane protein.<br>Endomembrane system; Single-pass type I membrane protein. Membrane $\hat{\epsilon}^{\circ}$ clathrin-coated pit; Single-pass type I membrane protein. |
| P61027 | RAB10_MOUSE Ras-related protein Rab-10 OS=Mus musculus GN=Rab10 PE=1 SV=1                    | 1.66E-08 | 32.2 | 17.0 | 29 (11 3 0 15 0) | Cell membrane;<br>Lipid-anchor;<br>Cytoplasmic side.                                                                                                                                                            |
| Q9Z0L0 | TPBG_MOUSE Trophoblast glycoprotein OS=Mus musculus GN=Tpbg PE=1 SV=2                        | 1.46E-08 | 20.2 | 5.6  | 3 (3 0 0 0 0)    | Membrane; Single-pass type I membrane protein.                                                                                                                                                                  |
| P62196 | PRS8_MOUSE 26S protease regulatory subunit 8 OS=Mus musculus GN=Psmc5 PE=1 SV=1              | 1.37E-07 | 20.2 | 5.4  | 2 (2 0 0 0 0)    | Cytoplasm.<br>Nucleus.                                                                                                                                                                                          |
| O35874 | SATT_MOUSE Neutral amino acid transporter A OS=Mus musculus GN=Slc1a4 PE=1 SV=1              | 1.11E-16 | 30.3 | 9.0  | 5 (5 0 0 0 0)    | Membrane; Multi-pass membrane protein.<br>Melanosome.                                                                                                                                                           |
| P25911 | LYN_MOUSE Tyrosine-protein kinase Lyn OS=Mus musculus GN=Lyn PE=1 SV=4                       | 1.79E-07 | 20.2 | 4.9  | 2 (2 0 0 0 0)    | Cell membrane.<br>Nucleus.<br>Cytoplasm.<br>Cytoplasm $\hat{\epsilon}^{\circ}$ perinuclear region.<br>Golgi apparatus.                                                                                          |



*A novel role of mitochondria in muscle injury*

|        |                                                                                                      |          |      |      |               |                                                                                                                                                                                                                                                                                                                        |
|--------|------------------------------------------------------------------------------------------------------|----------|------|------|---------------|------------------------------------------------------------------------------------------------------------------------------------------------------------------------------------------------------------------------------------------------------------------------------------------------------------------------|
| Q8VCH8 | UBXN4_MOUSE UBX domain-containing protein 4 OS=Mus musculus GN=Ubxn4 PE=1 SV=1                       | 1.89E-11 | 30.3 | 7.7  | 3 (3 0 0 0 0) | Endoplasmic reticulum membrane; Peripheral membrane protein. Nucleus envelope.                                                                                                                                                                                                                                         |
| Q9JIW9 | RALB_MOUSE Ras-related protein Ral-B OS=Mus musculus GN=Ralb PE=2 SV=1                               | 1.62E-11 | 30.3 | 19.9 | 5 (5 0 0 0 0) | Cell membrane; Lipid-anchor; Cytoplasmic side.                                                                                                                                                                                                                                                                         |
| Q9CR62 | M2OM_MOUSE Mitochondrial 2-oxoglutarate/malate carrier protein OS=Mus musculus GN=Slc25a11 PE=1 SV=3 | 1.18E-10 | 30.3 | 15.9 | 5 (5 0 0 0 0) | Mitochondrion inner membrane; Multi-pass membrane protein.                                                                                                                                                                                                                                                             |
| P27659 | RL3_MOUSE 60S ribosomal protein L3 OS=Mus musculus GN=Rpl3 PE=2 SV=2                                 | 1.34E-07 | 20.2 | 5.2  | 2 (2 0 0 0 0) | Cytoplasm.                                                                                                                                                                                                                                                                                                             |
| P84099 | RL19_MOUSE 60S ribosomal protein L19 OS=Mus musculus GN=Rpl19 PE=1 SV=1                              | 5.22E-14 | 30.3 | 17.3 | 4 (4 0 0 0 0) | ND                                                                                                                                                                                                                                                                                                                     |
| P06837 | NEUM_MOUSE Neuromodulin OS=Mus musculus GN=Gap43 PE=1 SV=1                                           | 6.71E-13 | 30.3 | 23.3 | 3 (3 0 0 0 0) | Cell membrane; Peripheral membrane protein; Cytoplasmic side. Cell projection $\hat{\epsilon}^{\circ}$ growth cone membrane; Peripheral membrane protein; Cytoplasmic side. Cell junction $\hat{\epsilon}^{\circ}$ synapse. Cell projection $\hat{\epsilon}^{\circ}$ filopodium membrane; Peripheral membrane protein. |
| P97350 | PKP1_MOUSE Plakophilin-1 OS=Mus musculus GN=Pkp1 PE=1 SV=1                                           | 7.58E-09 | 30.2 | 5.1  | 3 (3 0 0 0 0) | Nucleus. Cell junction $\hat{\epsilon}^{\circ}$ desmosome.                                                                                                                                                                                                                                                             |
| Q7TPV4 | MBB1A_MOUSE Myb-binding protein 1A OS=Mus musculus GN=Mybbp1a PE=1 SV=2                              | 4.19E-06 | 20.1 | 1.8  | 2 (2 0 0 0 0) | Nucleus $\hat{\epsilon}^{\circ}$ nucleolus. Cytoplasm.                                                                                                                                                                                                                                                                 |
| O08638 | MYH11_MOUSE Myosin-11 OS=Mus musculus GN=Myh11 PE=1 SV=1                                             | 5.56E-13 | 30.2 | 1.8  | 7 (7 0 0 0 0) | Melanosome. Cytoplasm $\hat{\epsilon}^{\circ}$ myofibril.                                                                                                                                                                                                                                                              |
| Q9JI59 | JAM2_MOUSE Junctional adhesion molecule B OS=Mus musculus GN=Jam2 PE=1 SV=1                          | 2.89E-07 | 20.1 | 7.0  | 2 (2 0 0 0 0) | Cell junction $\hat{\epsilon}^{\circ}$ tight junction. Cell membrane; Single-pass type I membrane protein.                                                                                                                                                                                                             |

*A novel role of mitochondria in muscle injury*

|        |                                                                                                            |          |      |      |               |                                                                                                                                                                                              |
|--------|------------------------------------------------------------------------------------------------------------|----------|------|------|---------------|----------------------------------------------------------------------------------------------------------------------------------------------------------------------------------------------|
| P32507 | PVRL2_MOUSE Poliovirus receptor-related protein 2<br>OS=Mus musculus<br>GN=Pvrl2 PE=1 SV=2                 | 2.44E-08 | 30.2 | 8.9  | 3 (3 0 0 0 0) | Cell membrane;<br>Single-pass type I<br>membrane protein.                                                                                                                                    |
| P48036 | ANXA5_MOUSE Annexin A5<br>OS=Mus musculus<br>GN=Anxa5 PE=1 SV=1                                            | 1.73E-08 | 30.2 | 12.2 | 3 (3 0 0 0 0) | ND                                                                                                                                                                                           |
| P62702 | RS4X_MOUSE 40S ribosomal protein S4, X isoform<br>OS=Mus musculus<br>GN=Rps4x PE=2 SV=2                    | 5.13E-05 | 20.1 | 7.6  | 2 (2 0 0 0 0) | Cytoplasm.                                                                                                                                                                                   |
| Q78IK4 | APOOL_MOUSE Apolipoprotein O-like<br>OS=Mus musculus<br>GN=Apool PE=2 SV=1                                 | 1.21E-09 | 30.2 | 10.2 | 3 (3 0 0 0 0) | Secreted.                                                                                                                                                                                    |
| Q3UM83 | KLRG2_MOUSE Killer cell lectin-like receptor subfamily G member 2<br>OS=Mus musculus<br>GN=Klrg2 PE=2 SV=1 | 3.24E-07 | 20.1 | 6.5  | 2 (2 0 0 0 0) | Membrane; Single-pass membrane protein.                                                                                                                                                      |
| Q61503 | 5NTD_MOUSE 5'-nucleotidase<br>OS=Mus musculus<br>GN=Nt5e PE=1 SV=2                                         | 2.31E-07 | 20.1 | 3.5  | 2 (2 0 0 0 0) | Cell membrane;<br>Lipid-anchor &#x2122;<br>GPI-anchor.                                                                                                                                       |
| P16110 | LEG3_MOUSE Galectin-3<br>OS=Mus musculus<br>GN=Lgals3 PE=1 SV=3                                            | 2.33E-06 | 20.1 | 8.3  | 2 (2 0 0 0 0) | Cytoplasm.<br>Nucleus. Secreted.                                                                                                                                                             |
| Q9WT17 | MYO1C_MOUSE Myosin-Ic<br>OS=Mus musculus<br>GN=Myo1c PE=1 SV=2                                             | 1.45E-11 | 30.2 | 4.7  | 5 (5 0 0 0 0) | Cytoplasm. Cell membrane. Cell projection &#x2122;<br>stereocilium membrane.<br>Nucleus &#x2122;<br>nucleolus. Nucleus &#x2122;<br>nucleoplasm.<br>Nucleus &#x2122;<br>nuclear pore complex. |
| Q61990 | PCBP2_MOUSE Poly(rC)-binding protein 2<br>OS=Mus musculus<br>GN=Pcbp2 PE=1 SV=1                            | 4.10E-06 | 20.1 | 6.6  | 2 (2 0 0 0 0) | Nucleus.<br>Cytoplasm.                                                                                                                                                                       |
| Q6ZWV7 | RL35_MOUSE 60S ribosomal protein L35<br>OS=Mus musculus<br>GN=Rpl35 PE=2 SV=1                              | 1.32E-09 | 30.2 | 12.2 | 4 (4 0 0 0 0) | ND                                                                                                                                                                                           |
| P63101 | 1433Z_MOUSE 14-3-3 protein zeta/delta<br>OS=Mus musculus<br>GN=Ywhaz PE=1 SV=1                             | 6.25E-10 | 30.2 | 16.3 | 4 (4 0 0 0 0) | Cytoplasm.<br>Melanosome.                                                                                                                                                                    |
| P54763 | EPHB2_MOUSE Ephrin type-B receptor 2<br>OS=Mus musculus<br>GN=Ephb2 PE=1 SV=2                              | 1.83E-07 | 20.1 | 2.8  | 2 (2 0 0 0 0) | Membrane; Single-pass type I<br>membrane protein.                                                                                                                                            |

*A novel role of mitochondria in muscle injury*

|        |                                                                                                                            |          |      |      |                 |                                                                         |
|--------|----------------------------------------------------------------------------------------------------------------------------|----------|------|------|-----------------|-------------------------------------------------------------------------|
| Q80WW9 | DDRGK_MOUSE DDRGK domain-containing protein 1<br>OS=Mus musculus<br>GN=Ddrkg1 PE=1 SV=2                                    | 7.05E-11 | 30.2 | 11.4 | 3 (3 0 0 0 0)   | Endoplasmic reticulum.                                                  |
| Q61468 | MSLN_MOUSE Mesothelin<br>OS=Mus musculus<br>GN=Msln PE=1 SV=1                                                              | 8.50E-05 | 20.1 | 1.6  | 2 (2 0 0 0 0)   | Cell membrane; Lipid-anchor ° GPI-anchor. Golgi apparatus. Secreted.    |
| P35293 | RAB18_MOUSE Ras-related protein Rab-18<br>OS=Mus musculus<br>GN=Rab18 PE=2 SV=2                                            | 2.75E-09 | 30.2 | 18.0 | 4 (4 0 0 0 0)   | Apical cell membrane; Lipid-anchor. Basal cell membrane; Lipid-anchor.  |
| Q9R1Q9 | VAS1_MOUSE V-type proton ATPase subunit S1<br>OS=Mus musculus<br>GN=Atp6ap1 PE=1 SV=1                                      | 5.32E-08 | 30.2 | 8.9  | 3 (3 0 0 0 0)   | Vacuole membrane; Single-pass membrane protein.                         |
| Q8BY89 | CTL2_MOUSE Choline transporter-like protein 2<br>OS=Mus musculus<br>GN=Slc44a2 PE=1 SV=1                                   | 4.06E-04 | 18.1 | 2.3  | 2 (1 1 0 0 0)   | Membrane; Multi-pass membrane protein.                                  |
| Q9CYL5 | GAPR1_MOUSE Golgi-associated plant pathogenesis-related protein 1<br>OS=Mus musculus<br>GN=Glpr2 PE=2 SV=3                 | 1.99E-08 | 30.2 | 24.7 | 5 (5 0 0 0 0)   | Golgi apparatus membrane; Lipid-anchor.                                 |
| P99024 | TBB5_MOUSE Tubulin beta-5 chain<br>OS=Mus musculus<br>GN=Tubb5 PE=1 SV=1                                                   | 1.27E-08 | 30.2 | 9.9  | 24 (24 0 0 0 0) | Cytoplasm ° cytoskeleton.                                               |
| P61022 | CHP1_MOUSE Calcium-binding protein p22<br>OS=Mus musculus<br>GN=Chp PE=2 SV=2                                              | 9.16E-08 | 30.2 | 17.9 | 3 (3 0 0 0 0)   | Cytoplasm.                                                              |
| Q91WD5 | NDUS2_MOUSE NADH dehydrogenase [ubiquinone] iron-sulfur protein 2, mitochondrial<br>OS=Mus musculus<br>GN=Ndufs2 PE=1 SV=1 | 9.58E-07 | 30.2 | 5.2  | 3 (3 0 0 0 0)   | Mitochondrion inner membrane; Peripheral membrane protein; Matrix side. |
| O35857 | TIM44_MOUSE Mitochondrial import inner membrane translocase subunit TIM44<br>OS=Mus musculus<br>GN=Timm44 PE=2 SV=1        | 6.37E-08 | 30.2 | 8.4  | 3 (3 0 0 0 0)   | Mitochondrion inner membrane.                                           |
| Q9Z2T6 | KRT85_MOUSE Keratin, type II cuticular Hb5<br>OS=Mus musculus<br>GN=Krt85 PE=2 SV=2                                        | 8.36E-07 | 30.2 | 3.9  | 7 (7 0 0 0 0)   | ND                                                                      |
| Q9Z127 | LAT1_MOUSE Large neutral amino acids transporter small subunit 1<br>OS=Mus musculus                                        | 1.31E-12 | 30.2 | 6.1  | 14 (14 0 0 0 0) | Cytoplasm ° cytosol. Apical cell membrane; Multi-pass membrane          |

*A novel role of mitochondria in muscle injury*

|        |                                                                                                  |          |      |      |               |                                                                                                                                         |
|--------|--------------------------------------------------------------------------------------------------|----------|------|------|---------------|-----------------------------------------------------------------------------------------------------------------------------------------|
|        | GN=Slc7a5 PE=1 SV=1                                                                              |          |      |      |               | protein.                                                                                                                                |
| P55302 | AMRP_MOUSE Alpha-2-macroglobulin receptor-associated protein OS=Mus musculus GN=Lrpap1 PE=1 SV=1 | 6.76E-12 | 30.2 | 9.4  | 3 (3 0 0 0 0) | Endoplasmic reticulum. Cytoplasm. Cell surface.                                                                                         |
| Q64133 | AOFA_MOUSE Amine oxidase [flavin-containing] A OS=Mus musculus GN=Maoa PE=1 SV=2                 | 2.41E-12 | 30.2 | 8.0  | 4 (4 0 0 0 0) | Mitochondrion outer membrane; Single-pass type IV membrane protein; Cytoplasmic side.                                                   |
| Q99KN9 | EPN4_MOUSE Clathrin interactor 1 OS=Mus musculus GN=Clint1 PE=1 SV=2                             | 1.19E-07 | 30.2 | 7.8  | 3 (3 0 0 0 0) | Cytoplasm. Cytoplasmic perinuclear region. Membrane; Peripheral membrane protein. Cytoplasmic vesicle clathrin-coated vesicle.          |
| Q99J47 | DRS7B_MOUSE Dehydrogenase/reductase SDR family member 7B OS=Mus musculus GN=Dhrs7b PE=2 SV=1     | 9.32E-10 | 30.2 | 13.0 | 3 (3 0 0 0 0) | Peroxisome membrane; Single-pass type II membrane protein.                                                                              |
| Q9WTS2 | FUT8_MOUSE Alpha-(1,6)-fucosyltransferase OS=Mus musculus GN=Fut8 PE=2 SV=1                      | 8.50E-13 | 30.2 | 6.3  | 3 (3 0 0 0 0) | Golgi apparatus Golgi stack membrane; Single-pass type II membrane protein.                                                             |
| Q91X78 | ERLN1_MOUSE Erlin-1 OS=Mus musculus GN=Erlin1 PE=2 SV=1                                          | 2.16E-08 | 30.2 | 9.8  | 6 (6 0 0 0 0) | Endoplasmic reticulum membrane; Single-pass type II membrane protein.                                                                   |
| Q64727 | VINC_MOUSE Vinculin OS=Mus musculus GN=Vcl PE=1 SV=4                                             | 6.61E-08 | 30.2 | 3.7  | 6 (6 0 0 0 0) | Cytoplasmic cytoskeleton. Cell junction adherens junction. Cell membrane; Peripheral membrane protein; Cytoplasmic side. Cell junction. |
| Q9ES97 | RTN3_MOUSE Reticulon-3 OS=Mus musculus GN=Rtn3 PE=1 SV=2                                         | 7.91E-09 | 30.2 | 2.3  | 5 (5 0 0 0 0) | Endoplasmic reticulum membrane; Multi-pass membrane protein. Golgi apparatus membrane; Multi-pass membrane protein.                     |

*A novel role of mitochondria in muscle injury*

|        |                                                                                                     |          |      |      |                 |                                                                                                           |
|--------|-----------------------------------------------------------------------------------------------------|----------|------|------|-----------------|-----------------------------------------------------------------------------------------------------------|
| Q9JHU4 | DYHC1_MOUSE<br>Cytoplasmic dynein 1 heavy chain 1 OS=Mus musculus GN=Dync1h1 PE=1 SV=1              | 8.08E-09 | 30.2 | 0.9  | 3 (3 0 0 0 0)   | Cytoplasm &° cytoskeleton.                                                                                |
| Q9DCX2 | ATP5H_MOUSE ATP synthase subunit d, mitochondrial OS=Mus musculus GN=Atp5h PE=1 SV=3                | 9.50E-08 | 30.2 | 20.5 | 5 (5 0 0 0 0)   | Mitochondrion. Mitochondrion inner membrane.                                                              |
| P26043 | RADI_MOUSE Radixin OS=Mus musculus GN=Rdx PE=1 SV=2                                                 | 2.96E-05 | 30.2 | 3.8  | 4 (4 0 0 0 0)   | Cell membrane; Peripheral membrane protein; Cytoplasmic side. Cytoplasm &° cytoskeleton. Cleavage furrow. |
| Q9R0E1 | PLOD3_MOUSE Procollagen-lysine,2-oxoglutarate 5-dioxygenase 3 OS=Mus musculus GN=Plod3 PE=1 SV=1    | 1.30E-09 | 30.2 | 3.2  | 4 (4 0 0 0 0)   | Rough endoplasmic reticulum membrane; Peripheral membrane protein; Luminal side.                          |
| Q8BGH2 | SAM50_MOUSE Sorting and assembly machinery component 50 homolog OS=Mus musculus GN=Samm50 PE=1 SV=1 | 3.03E-08 | 30.2 | 7.0  | 3 (3 0 0 0 0)   | Mitochondrion outer membrane; Multi-pass membrane protein. Cytoplasm.                                     |
| Q7TN29 | SMAP2_MOUSE Stromal membrane-associated protein 2 OS=Mus musculus GN=Smap2 PE=1 SV=1                | 8.35E-10 | 30.2 | 9.3  | 7 (7 0 0 0 0)   | Cytoplasm.                                                                                                |
| P21279 | GNAQ_MOUSE Guanine nucleotide-binding protein G(q) subunit alpha OS=Mus musculus GN=Gnaq PE=1 SV=4  | 3.20E-10 | 30.2 | 10.0 | 3 (3 0 0 0 0)   | ND                                                                                                        |
| P30412 | PPIC_MOUSE Peptidyl-prolyl cis-trans isomerase C OS=Mus musculus GN=Ppic PE=1 SV=1                  | 6.08E-11 | 30.2 | 18.9 | 4 (4 0 0 0 0)   | Cytoplasm.                                                                                                |
| Q80U72 | SCRIB_MOUSE Protein scribble homolog OS=Mus musculus GN=Scrib PE=1 SV=2                             | 1.72E-10 | 30.2 | 2.8  | 4 (4 0 0 0 0)   | Cell membrane; Peripheral membrane protein. Cell junction &° adherens junction. Cytoplasm.                |
| P04104 | K2C1_MOUSE Keratin, type II cytoskeletal 1 OS=Mus musculus GN=Krt1 PE=1 SV=4                        | 5.18E-09 | 30.2 | 3.6  | 28 (28 0 0 0 0) | Cell membrane.                                                                                            |
| P27046 | MA2A1_MOUSE Alpha-mannosidase 2 OS=Mus musculus GN=Man2a1 PE=1 SV=1                                 | 6.22E-08 | 30.2 | 3.0  | 3 (3 0 0 0 0)   | Golgi apparatus membrane; Single-pass type II membrane protein.                                           |

|        |                                                                                                                       |          |      |      |                 |                                                                                                                |
|--------|-----------------------------------------------------------------------------------------------------------------------|----------|------|------|-----------------|----------------------------------------------------------------------------------------------------------------|
| Q99KF1 | TMED9_MOUSE<br>Transmembrane emp24<br>domain-containing protein 9<br>OS=Mus musculus<br>GN=Tmed9 PE=2 SV=2            | 7.87E-09 | 30.2 | 15.7 | 5 (5 0 0 0 0)   | Endoplasmic<br>reticulum<br>membrane; Single-<br>pass type I<br>membrane protein.                              |
| Q9WV92 | E41L3_MOUSE Band 4.1-<br>like protein 3 OS=Mus<br>musculus GN=Epb4113<br>PE=1 SV=1                                    | 1.72E-06 | 30.2 | 3.4  | 6 (6 0 0 0 0)   | Cytoplasmic<br>cytoskeleton.                                                                                   |
| Q6PB66 | LPPRC_MOUSE Leucine-<br>rich PPR motif-containing<br>protein, mitochondrial<br>OS=Mus musculus<br>GN=Lrpprc PE=1 SV=2 | 3.61E-09 | 30.2 | 2.9  | 5 (5 0 0 0 0)   | Mitochondrion.<br>Nucleus. Nucleus<br>nucleoplasm.<br>Nucleus inner<br>membrane.<br>Nucleus outer<br>membrane. |
| Q8BKC5 | IPO5_MOUSE Importin-5<br>OS=Mus musculus GN=Ipo5<br>PE=1 SV=3                                                         | 6.70E-08 | 30.2 | 3.3  | 3 (3 0 0 0 0)   | Cytoplasm.<br>Nucleus.                                                                                         |
| Q64213 | SF01_MOUSE Splicing<br>factor 1 OS=Mus musculus<br>GN=Sf1 PE=1 SV=5                                                   | 5.12E-10 | 30.2 | 6.1  | 6 (6 0 0 0 0)   | Nucleus.                                                                                                       |
| Q7TQH0 | ATX2L_MOUSE Ataxin-2-<br>like protein OS=Mus<br>musculus GN=Atxn2l PE=1<br>SV=1                                       | 3.67E-10 | 30.2 | 3.1  | 4 (4 0 0 0 0)   | Membrane;<br>Peripheral<br>membrane protein.                                                                   |
| Q8BXZ1 | TMX3_MOUSE Protein<br>disulfide-isomerase TMX3<br>OS=Mus musculus<br>GN=Tmx3 PE=1 SV=2                                | 1.79E-07 | 30.2 | 9.0  | 3 (3 0 0 0 0)   | Endoplasmic<br>reticulum<br>membrane; Single-<br>pass membrane<br>protein.                                     |
| P14206 | RSSA_MOUSE 40S<br>ribosomal protein SA<br>OS=Mus musculus<br>GN=Rpsa PE=1 SV=4                                        | 3.22E-06 | 30.2 | 12.9 | 3 (3 0 0 0 0)   | Cell membrane.<br>Cytoplasm.<br>Nucleus.                                                                       |
| P08730 | K1C13_MOUSE Keratin,<br>type I cytoskeletal 13<br>OS=Mus musculus<br>GN=Krt13 PE=1 SV=2                               | 1.12E-06 | 30.2 | 4.6  | 23 (23 0 0 0 0) | ND                                                                                                             |
| Q3UVK0 | ERMP1_MOUSE<br>Endoplasmic reticulum<br>metallopeptidase 1 OS=Mus<br>musculus GN=Ermp1 PE=1<br>SV=2                   | 1.56E-08 | 30.2 | 3.9  | 3 (3 0 0 0 0)   | Endoplasmic<br>reticulum<br>membrane; Multi-<br>pass membrane<br>protein.                                      |
| Q60716 | P4HA2_MOUSE Prolyl 4-<br>hydroxylase subunit alpha-2<br>OS=Mus musculus<br>GN=P4ha2 PE=2 SV=1                         | 6.74E-09 | 30.2 | 6.7  | 5 (5 0 0 0 0)   | Endoplasmic<br>reticulum lumen.                                                                                |
| Q6ZQ38 | CAND1_MOUSE Cullin-<br>associated NEDD8-<br>dissociated protein 1<br>OS=Mus musculus<br>GN=Cand1 PE=2 SV=2            | 1.22E-08 | 30.2 | 3.0  | 3 (3 0 0 0 0)   | Nucleus.                                                                                                       |

|        |                                                                                                       |          |      |      |               |                                                                                                   |
|--------|-------------------------------------------------------------------------------------------------------|----------|------|------|---------------|---------------------------------------------------------------------------------------------------|
| P54071 | IDHP_MOUSE Isocitrate dehydrogenase [NADP], mitochondrial OS=Mus musculus GN=Idh2 PE=1 SV=3           | 2.53E-11 | 30.2 | 7.3  | 9 (9 0 0 0 0) | Mitochondrion.                                                                                    |
| P25444 | RS2_MOUSE 40S ribosomal protein S2 OS=Mus musculus GN=Rps2 PE=1 SV=3                                  | 5.18E-07 | 30.2 | 10.6 | 3 (3 0 0 0 0) | ND                                                                                                |
| Q91VX2 | UBAP2_MOUSE Ubiquitin-associated protein 2 OS=Mus musculus GN=Ubp2 PE=2 SV=1                          | 6.09E-08 | 30.2 | 3.6  | 3 (3 0 0 0 0) | ND                                                                                                |
| O08807 | PRDX4_MOUSE Peroxiredoxin-4 OS=Mus musculus GN=Prdx4 PE=1 SV=1                                        | 1.25E-06 | 30.2 | 12.4 | 7 (7 0 0 0 0) | Cytoplasm. Secreted.                                                                              |
| Q9CR68 | UCRI_MOUSE Cytochrome b-c1 complex subunit Rieske, mitochondrial OS=Mus musculus GN=Uqcrfs1 PE=1 SV=1 | 5.98E-10 | 30.2 | 16.1 | 4 (4 0 0 0 0) | Mitochondrion inner membrane.                                                                     |
| P13020 | GELS_MOUSE Gelsolin OS=Mus musculus GN=Gsn PE=1 SV=3                                                  | 5.71E-07 | 30.2 | 5.3  | 4 (4 0 0 0 0) | Cytoplasm <sup>â€</sup> cytoskeleton. Secreted.                                                   |
| Q9EP72 | CO024_MOUSE UPF0480 protein C15orf24 homolog OS=Mus musculus GN=ORF3 PE=2 SV=1                        | 8.24E-10 | 30.2 | 16.6 | 5 (5 0 0 0 0) | Membrane; Single-pass type I membrane protein.                                                    |
| Q9D7N9 | APMAP_MOUSE Adipocyte plasma membrane-associated protein OS=Mus musculus GN=Apmap PE=1 SV=1           | 1.61E-08 | 30.2 | 8.2  | 4 (4 0 0 0 0) | Membrane; Single-pass type II membrane protein.                                                   |
| O08579 | EMD_MOUSE Emerin OS=Mus musculus GN=Emd PE=1 SV=1                                                     | 8.10E-08 | 30.2 | 16.2 | 3 (3 0 0 0 0) | Nucleus inner membrane; Single-pass membrane protein; Nucleoplasmic side. Nucleus outer membrane. |
| Q9R099 | TBL2_MOUSE Transducin beta-like protein 2 OS=Mus musculus GN=Tbl2 PE=2 SV=1                           | 1.24E-09 | 30.2 | 8.1  | 4 (4 0 0 0 0) | ND                                                                                                |
| Q9D1D4 | TMEDA_MOUSE Transmembrane emp24 domain-containing protein 10 OS=Mus musculus GN=Tmed10 PE=2 SV=1      | 1.66E-07 | 30.2 | 15.1 | 4 (4 0 0 0 0) | Golgi apparatus membrane; Single-pass type I membrane protein; Luminal side. Melanosome.          |
| Q8VDP6 | CDIPT_MOUSE CDP-diacylglycerol--inositol 3-phosphatidyltransferase OS=Mus musculus                    | 1.42E-05 | 30.2 | 9.9  | 3 (3 0 0 0 0) | Endoplasmic reticulum membrane; Multi-pass membrane                                               |

*A novel role of mitochondria in muscle injury*

|        |                                                                                                                       |          |      |      |               |                                                                                                             |
|--------|-----------------------------------------------------------------------------------------------------------------------|----------|------|------|---------------|-------------------------------------------------------------------------------------------------------------|
|        | GN=Cdipt PE=1 SV=1                                                                                                    |          |      |      |               | protein. Golgi apparatus membrane; Multi-pass membrane protein. Cell membrane; Multi-pass membrane protein. |
| P62835 | RAP1A_MOUSE Ras-related protein Rap-1A OS=Mus musculus GN=Rap1a PE=2 SV=1                                             | 1.46E-09 | 30.2 | 19.0 | 9 (9 0 0 0 0) | Cell membrane; Lipid-anchor.                                                                                |
| Q9Z210 | LETM1_MOUSE LETM1 and EF-hand domain-containing protein 1, mitochondrial OS=Mus musculus GN=Letm1 PE=2 SV=1           | 1.99E-08 | 30.2 | 4.6  | 3 (3 0 0 0 0) | Mitochondrion inner membrane; Single-pass membrane protein.                                                 |
| Q9D880 | TIM50_MOUSE Mitochondrial import inner membrane translocase subunit TIM50 OS=Mus musculus GN=Timm50 PE=1 SV=1         | 1.62E-07 | 30.2 | 9.3  | 5 (5 0 0 0 0) | Mitochondrion inner membrane; Single-pass membrane protein.                                                 |
| Q921G7 | ETFD_MOUSE Electron transfer flavoprotein-ubiquinone oxidoreductase, mitochondrial OS=Mus musculus GN=Etfdh PE=1 SV=1 | 3.25E-05 | 30.2 | 5.5  | 3 (3 0 0 0 0) | Mitochondrion inner membrane.                                                                               |
| Q6R0H7 | GNAS1_MOUSE Guanine nucleotide-binding protein G(s) subunit alpha isoforms XLas OS=Mus musculus GN=Gnas PE=2 SV=1     | 1.44E-08 | 30.2 | 3.1  | 3 (3 0 0 0 0) | Cell membrane; Peripheral membrane protein.                                                                 |
| Q80UM7 | MOGS_MOUSE Mannosyl-oligosaccharide glucosidase OS=Mus musculus GN=Mogs PE=2 SV=1                                     | 2.50E-09 | 30.2 | 4.1  | 4 (4 0 0 0 0) | Endoplasmic reticulum membrane; Single-pass type II membrane protein.                                       |
| Q8VHE0 | SEC63_MOUSE Translocation protein SEC63 homolog OS=Mus musculus GN=Sec63 PE=1 SV=3                                    | 2.53E-06 | 30.2 | 4.3  | 3 (3 0 0 0 0) | Endoplasmic reticulum membrane; Multi-pass membrane protein.                                                |
| Q497I4 | KRT35_MOUSE Keratin, type I cuticular Ha5 OS=Mus musculus GN=Krt35 PE=2 SV=1                                          | 7.65E-07 | 30.1 | 4.6  | 3 (3 0 0 0 0) | ND                                                                                                          |
| Q9D0E1 | HNRPM_MOUSE Heterogeneous nuclear ribonucleoprotein M OS=Mus musculus GN=Hnrpm PE=1 SV=3                              | 5.53E-06 | 30.1 | 4.9  | 4 (4 0 0 0 0) | Nucleus.                                                                                                    |



|        |                                                                                                                |          |      |      |                 |                                                                         |
|--------|----------------------------------------------------------------------------------------------------------------|----------|------|------|-----------------|-------------------------------------------------------------------------|
| Q6PD26 | PIGS_MOUSE GPI transamidase component<br>PIG-S OS=Mus musculus<br>GN=Pigs PE=1 SV=3                            | 6.24E-07 | 30.1 | 5.9  | 4 (4 0 0 0 0)   | Endoplasmic reticulum membrane; Multi-pass membrane protein.            |
| Q61941 | NNTM_MOUSE NAD(P) transhydrogenase,<br>mitochondrial OS=Mus musculus<br>GN=Nnt PE=1 SV=2                       | 1.03E-06 | 30.1 | 2.6  | 5 (5 0 0 0 0)   | Mitochondrion inner membrane; Multi-pass membrane protein; Matrix side. |
| Q61033 | LAP2A_MOUSE Lamina-associated polypeptide 2,<br>isoforms alpha/zeta OS=Mus musculus<br>GN=Tmpo PE=1 SV=3       | 4.39E-08 | 30.1 | 5.9  | 4 (4 0 0 0 0)   | Nucleus.<br>Chromosome.                                                 |
| Q8C3X8 | LMF2_MOUSE Lipase maturation factor 2 OS=Mus musculus<br>GN=Lmf2 PE=2 SV=1                                     | 2.14E-04 | 30.1 | 2.1  | 3 (3 0 0 0 0)   | Endoplasmic reticulum membrane; Multi-pass membrane protein.            |
| P61620 | S61A1_MOUSE Protein transport protein Sec61 subunit alpha isoform 1<br>OS=Mus musculus<br>GN=Sec61a1 PE=2 SV=2 | 2.74E-07 | 30.1 | 4.4  | 3 (3 0 0 0 0)   | Endoplasmic reticulum membrane; Multi-pass membrane protein.            |
| Q8VCM8 | NCLN_MOUSE Nicalin<br>OS=Mus musculus<br>GN=Ncln PE=2 SV=2                                                     | 6.21E-05 | 30.1 | 4.8  | 4 (4 0 0 0 0)   | Endoplasmic reticulum membrane; Single-pass membrane protein.           |
| P11679 | K2C8_MOUSE Keratin, type II cytoskeletal 8<br>OS=Mus musculus<br>GN=Krt8 PE=1 SV=4                             | 3.88E-10 | 28.2 | 2.9  | 27 (26 1 0 0 0) | Cytoplasm.<br>Nucleus<br>nucleoplasm.<br>Nucleus matrix.                |
| P35762 | CD81_MOUSE CD81 antigen<br>OS=Mus musculus<br>GN=Cd81 PE=1 SV=1                                                | 3.16E-13 | 20.3 | 8.5  | 5 (5 0 0 0 0)   | Membrane; Multi-pass membrane protein.                                  |
| Q9JII5 | DAZP1_MOUSE DAZ-associated protein 1<br>OS=Mus musculus<br>GN=Dazap1 PE=2 SV=2                                 | 1.56E-10 | 20.3 | 7.6  | 2 (2 0 0 0 0)   | Cytoplasm.<br>Nucleus.                                                  |
| Q99KI3 | TM111_MOUSE Transmembrane protein 111<br>OS=Mus musculus<br>GN=Tmem111 PE=2 SV=3                               | 3.29E-10 | 20.3 | 11.9 | 3 (3 0 0 0 0)   | Membrane; Multi-pass membrane protein.                                  |
| Q8C7E7 | STBD1_MOUSE Starch-binding domain-containing protein 1<br>OS=Mus musculus<br>GN=Stbd1 PE=1 SV=1                | 1.56E-07 | 20.3 | 8.0  | 2 (2 0 0 0 0)   | Membrane; Single-pass type III membrane protein.                        |
| P24668 | MPRD_MOUSE Cation-dependent mannose-6-phosphate receptor<br>OS=Mus musculus<br>GN=M6pr PE=1 SV=1               | 9.94E-12 | 20.3 | 8.6  | 2 (2 0 0 0 0)   | Lysosome membrane; Single-pass type I membrane protein.                 |

|        |                                                                                                       |          |      |      |               |                                                                                                                            |
|--------|-------------------------------------------------------------------------------------------------------|----------|------|------|---------------|----------------------------------------------------------------------------------------------------------------------------|
| Q99KV1 | DJB11_MOUSE DnaJ homolog subfamily B member 11 OS=Mus musculus GN=Dnajb11 PE=1 SV=1                   | 1.58E-11 | 20.2 | 9.8  | 2 (2 0 0 0 0) | Endoplasmic reticulum lumen.                                                                                               |
| Q924Z4 | LASS2_MOUSE LAG1 longevity assurance homolog 2 OS=Mus musculus GN=Lass2 PE=1 SV=1                     | 1.11E-14 | 20.2 | 4.7  | 2 (2 0 0 0 0) | Nucleus membrane; Multi-pass membrane protein. Endoplasmic reticulum membrane; Multi-pass membrane protein.                |
| Q9WUQ2 | PREB_MOUSE Prolactin regulatory element-binding protein OS=Mus musculus GN=Preb PE=1 SV=1             | 1.28E-09 | 20.2 | 6.2  | 2 (2 0 0 0 0) | Nucleus. Membrane; Single-pass membrane protein. Endoplasmic reticulum.                                                    |
| P47758 | SRPRB_MOUSE Signal recognition particle receptor subunit beta OS=Mus musculus GN=Srprb PE=1 SV=1      | 9.33E-14 | 20.2 | 11.9 | 3 (3 0 0 0 0) | Endoplasmic reticulum membrane; Single-pass membrane protein.                                                              |
| P62259 | 1433E_MOUSE 14-3-3 protein epsilon OS=Mus musculus GN=Ywhae PE=1 SV=1                                 | 2.18E-10 | 20.2 | 13.3 | 2 (2 0 0 0 0) | Cytoplasm. Melanosome.                                                                                                     |
| P07214 | SPRC_MOUSE SPARC OS=Mus musculus GN=Sparc PE=1 SV=1                                                   | 6.29E-09 | 20.2 | 4.6  | 3 (3 0 0 0 0) | Secreted $\text{â€}^\circ$ extracellular space $\text{â€}^\circ$ extracellular matrix $\text{â€}^\circ$ basement membrane. |
| Q9JKB3 | DBPA_MOUSE DNA-binding protein A OS=Mus musculus GN=Csda PE=1 SV=2                                    | 2.62E-09 | 20.2 | 8.9  | 2 (2 0 0 0 0) | Cytoplasm. Nucleus.                                                                                                        |
| Q9Z0R9 | FADS2_MOUSE Fatty acid desaturase 2 OS=Mus musculus GN=Fads2 PE=2 SV=1                                | 1.38E-12 | 20.2 | 6.1  | 2 (2 0 0 0 0) | Endoplasmic reticulum membrane; Multi-pass membrane protein.                                                               |
| Q9CY58 | PAIRB_MOUSE Plasminogen activator inhibitor 1 RNA-binding protein OS=Mus musculus GN=Serbp1 PE=1 SV=2 | 9.70E-09 | 20.2 | 6.6  | 3 (3 0 0 0 0) | Cytoplasm. Nucleus. Cytoplasm $\text{â€}^\circ$ perinuclear region.                                                        |
| Q9JJI8 | RL38_MOUSE 60S ribosomal protein L38 OS=Mus musculus GN=Rpl38 PE=2 SV=3                               | 1.34E-08 | 20.2 | 35.7 | 3 (3 0 0 0 0) | ND                                                                                                                         |
| Q8BP67 | RL24_MOUSE 60S ribosomal protein L24                                                                  | 8.84E-10 | 20.2 | 8.3  | 8 (8 0 0 0 0) | ND                                                                                                                         |

|        |                                                                                                         |          |      |      |               |                                                                                                                                                                                                                           |
|--------|---------------------------------------------------------------------------------------------------------|----------|------|------|---------------|---------------------------------------------------------------------------------------------------------------------------------------------------------------------------------------------------------------------------|
|        | OS=Mus musculus<br>GN=Rpl24 PE=2 SV=2                                                                   |          |      |      |               |                                                                                                                                                                                                                           |
| Q8VDL4 | ADPGK_MOUSE ADP-dependent glucokinase<br>OS=Mus musculus<br>GN=Adpgk PE=1 SV=2                          | 1.11E-14 | 20.2 | 6.3  | 3 (3 0 0 0 0) | Secreted.                                                                                                                                                                                                                 |
| Q9D0F3 | LMAN1_MOUSE Protein ERGIC-53<br>OS=Mus musculus GN=Lman1 PE=2 SV=1                                      | 1.14E-12 | 20.2 | 6.0  | 2 (2 0 0 0 0) | Endoplasmic reticulum-Golgi intermediate compartment membrane; Single-pass type I membrane protein. Golgi apparatus membrane; Single-pass membrane protein. Endoplasmic reticulum membrane; Single-pass membrane protein. |
| P50431 | GLYC_MOUSE Serine hydroxymethyltransferase, cytosolic<br>OS=Mus musculus GN=Shmt1 PE=1 SV=2             | 1.33E-09 | 20.2 | 2.9  | 4 (4 0 0 0 0) | Cytoplasm.                                                                                                                                                                                                                |
| Q6ZQI3 | MLEC_MOUSE Malectin<br>OS=Mus musculus GN=Mlec PE=2 SV=2                                                | 4.91E-09 | 20.2 | 8.6  | 2 (2 0 0 0 0) | Endoplasmic reticulum membrane; Single-pass type I membrane protein.                                                                                                                                                      |
| Q8JZN5 | ACAD9_MOUSE Acyl-CoA dehydrogenase family member 9, mitochondrial<br>OS=Mus musculus GN=Acad9 PE=2 SV=1 | 2.69E-11 | 20.2 | 4.2  | 4 (4 0 0 0 0) | Mitochondrion.                                                                                                                                                                                                            |
| P62830 | RL23_MOUSE 60S ribosomal protein L23<br>OS=Mus musculus GN=Rpl23 PE=2 SV=1                              | 5.57E-13 | 20.2 | 17.9 | 9 (9 0 0 0 0) | ND                                                                                                                                                                                                                        |
| Q9CQF9 | PCYOX_MOUSE Prenylcysteine oxidase<br>OS=Mus musculus GN=Pcyox1 PE=1 SV=1                               | 2.54E-06 | 20.2 | 5.0  | 2 (2 0 0 0 0) | Lysosome.                                                                                                                                                                                                                 |
| Q80V26 | IMPA3_MOUSE Inositol monophosphatase 3<br>OS=Mus musculus GN=Impad1 PE=2 SV=1                           | 4.66E-11 | 20.2 | 3.9  | 2 (2 0 0 0 0) | Membrane; Single-pass membrane protein.                                                                                                                                                                                   |
| O88967 | YME1_MOUSE ATP-dependent metalloprotease YME1L1<br>OS=Mus musculus GN=Yme1l1 PE=2 SV=1                  | 9.90E-09 | 20.2 | 3.8  | 4 (4 0 0 0 0) | Mitochondrion.                                                                                                                                                                                                            |
| Q8VCL2 | SCO2_MOUSE Protein SCO2 homolog, mitochondrial<br>OS=Mus                                                | 1.17E-10 | 20.2 | 9.4  | 2 (2 0 0 0 0) | Mitochondrion.                                                                                                                                                                                                            |

|        |                                                                                                                     |          |      |      |                 |                                                                       |
|--------|---------------------------------------------------------------------------------------------------------------------|----------|------|------|-----------------|-----------------------------------------------------------------------|
|        | musculus GN=Sco2 PE=2 SV=1                                                                                          |          |      |      |                 |                                                                       |
| Q9CR57 | RL14_MOUSE 60S ribosomal protein L14 OS=Mus musculus GN=Rpl14 PE=2 SV=3                                             | 1.37E-08 | 20.2 | 11.5 | 2 (2 0 0 0 0)   | ND                                                                    |
| P40240 | CD9_MOUSE CD9 antigen OS=Mus musculus GN=Cd9 PE=1 SV=2                                                              | 1.48E-08 | 20.2 | 10.2 | 4 (4 0 0 0 0)   | Membrane; Multi-pass membrane protein.                                |
| Q9CR60 | GOT1B_MOUSE Vesicle transport protein GOT1B OS=Mus musculus GN=Golt1b PE=2 SV=1                                     | 3.48E-08 | 20.2 | 19.6 | 2 (2 0 0 0 0)   | Golgi apparatus membrane; Multi-pass membrane protein.                |
| Q9CQN1 | TRAP1_MOUSE Heat shock protein 75 kDa, mitochondrial OS=Mus musculus GN=Trap1 PE=1 SV=1                             | 4.61E-06 | 20.2 | 3.3  | 3 (3 0 0 0 0)   | Mitochondrion.                                                        |
| O88696 | CLPP_MOUSE Putative ATP-dependent Clp protease proteolytic subunit, mitochondrial OS=Mus musculus GN=Clpp PE=2 SV=1 | 1.01E-10 | 20.2 | 9.6  | 2 (2 0 0 0 0)   | Mitochondrion matrix.                                                 |
| Q5FWK3 | RHG01_MOUSE Rho GTPase-activating protein 1 OS=Mus musculus GN=Arhgap1 PE=1 SV=1                                    | 7.95E-07 | 20.2 | 4.6  | 2 (2 0 0 0 0)   | Cytoplasm.                                                            |
| P17751 | TPIS_MOUSE Triosephosphate isomerase OS=Mus musculus GN=Tpi1 PE=1 SV=3                                              | 4.92E-10 | 20.2 | 10.8 | 2 (2 0 0 0 0)   | ND                                                                    |
| Q8BFZ9 | ERLN2_MOUSE Erlin-2 OS=Mus musculus GN=Erlin2 PE=1 SV=1                                                             | 3.21E-11 | 20.2 | 7.9  | 2 (2 0 0 0 0)   | Endoplasmic reticulum membrane; Single-pass type II membrane protein. |
| Q9D051 | ODPB_MOUSE Pyruvate dehydrogenase E1 component subunit beta, mitochondrial OS=Mus musculus GN=Pdhb PE=1 SV=1        | 5.83E-12 | 20.2 | 4.5  | 2 (2 0 0 0 0)   | Mitochondrion matrix.                                                 |
| Q8BWT1 | THIM_MOUSE 3-ketoacyl-CoA thiolase, mitochondrial OS=Mus musculus GN=Acaa2 PE=1 SV=2                                | 1.93E-07 | 20.2 | 6.8  | 2 (2 0 0 0 0)   | Mitochondrion.                                                        |
| P37040 | NCPR_MOUSE NADPH--cytochrome P450 reductase OS=Mus musculus GN=Por PE=1 SV=2                                        | 3.25E-09 | 20.2 | 2.8  | 10 (10 0 0 0 0) | Endoplasmic reticulum membrane; Peripheral membrane protein.          |
| P62242 | RS8_MOUSE 40S ribosomal protein S8 OS=Mus                                                                           | 3.07E-05 | 20.2 | 11.5 | 2 (2 0 0 0 0)   | Cytoplasm.                                                            |

*A novel role of mitochondria in muscle injury*

|        |                                                                                                                  |          |      |      |                 |                                                                                                                                              |
|--------|------------------------------------------------------------------------------------------------------------------|----------|------|------|-----------------|----------------------------------------------------------------------------------------------------------------------------------------------|
|        | musculus GN=Rps8 PE=1 SV=2                                                                                       |          |      |      |                 |                                                                                                                                              |
| P16381 | DDX3L_MOUSE Putative ATP-dependent RNA helicase P110 OS=Mus musculus GN=D1Pas1 PE=1 SV=1                         | 4.06E-08 | 20.2 | 3.9  | 10 (10 0 0 0 0) | ND                                                                                                                                           |
| Q32MW3 | ACO10_MOUSE Acyl-coenzyme A thioesterase 10, mitochondrial OS=Mus musculus GN=Acot10 PE=2 SV=1                   | 4.98E-08 | 20.2 | 4.8  | 2 (2 0 0 0 0)   | Mitochondrion.                                                                                                                               |
| Q9Z1W8 | AT12A_MOUSE Potassium-transporting ATPase alpha chain 2 OS=Mus musculus GN=Atp12a PE=1 SV=2                      | 1.53E-10 | 20.2 | 1.3  | 8 (8 0 0 0 0)   | Membrane; Multi-pass membrane protein.                                                                                                       |
| Q9ER00 | STX12_MOUSE Syntaxin-12 OS=Mus musculus GN=Stx12 PE=1 SV=1                                                       | 1.07E-07 | 20.2 | 11.3 | 2 (2 0 0 0 0)   | Endomembrane system; Single-pass type IV membrane protein; Cytoplasmic side. Golgi apparatus membrane; Single-pass type IV membrane protein. |
| Q8R3H7 | HS2ST_MOUSE Heparan sulfate 2-O-sulfotransferase 1 OS=Mus musculus GN=Hs2st1 PE=1 SV=2                           | 4.17E-08 | 20.2 | 3.4  | 3 (3 0 0 0 0)   | Golgi apparatus membrane; Single-pass type II membrane protein.                                                                              |
| P40124 | CAP1_MOUSE Adenylyl cyclase-associated protein 1 OS=Mus musculus GN=Cap1 PE=1 SV=3                               | 1.90E-06 | 20.2 | 4.6  | 2 (2 0 0 0 0)   | Cell membrane; Peripheral membrane protein.                                                                                                  |
| Q61029 | LAP2B_MOUSE Lamina-associated polypeptide 2, isoforms beta/delta/epsilon/gamma OS=Mus musculus GN=Tmpo PE=1 SV=3 | 1.45E-06 | 20.2 | 6.2  | 2 (2 0 0 0 0)   | Nucleus inner membrane; Single-pass type II membrane protein. Chromosome.                                                                    |
| P61255 | RL26_MOUSE 60S ribosomal protein L26 OS=Mus musculus GN=Rpl26 PE=2 SV=1                                          | 6.18E-07 | 20.2 | 15.9 | 4 (4 0 0 0 0)   | ND                                                                                                                                           |
| P63001 | RAC1_MOUSE Ras-related C3 botulinum toxin substrate 1 OS=Mus musculus GN=Rac1 PE=1 SV=1                          | 3.23E-07 | 20.2 | 14.1 | 2 (2 0 0 0 0)   | Cell membrane; Lipid-anchor; Cytoplasmic side. Melanosome.                                                                                   |
| O70456 | 1433S_MOUSE 14-3-3 protein sigma OS=Mus musculus GN=Sfn PE=1 SV=1                                                | 5.04E-09 | 20.2 | 5.2  | 2 (2 0 0 0 0)   | Cytoplasm. Nucleus. Secreted.                                                                                                                |

*A novel role of mitochondria in muscle injury*

|        |                                                                                                                                            |          |      |      |               |                                                                                                                                                                                                                                                        |
|--------|--------------------------------------------------------------------------------------------------------------------------------------------|----------|------|------|---------------|--------------------------------------------------------------------------------------------------------------------------------------------------------------------------------------------------------------------------------------------------------|
| P42208 | SEPT2_MOUSE Septin-2<br>OS=Mus musculus<br>GN=Sept2 PE=1 SV=2                                                                              | 4.19E-07 | 20.2 | 7.8  | 2 (2 0 0 0 0) | Cytoplasm.<br>Cytoplasm $\hat{c}$<br>cytoskeleton.<br>Cytoplasm $\hat{c}$<br>cytoskeleton $\hat{c}$<br>spindle.<br>Chromosome $\hat{c}$<br>centromere $\hat{c}$<br>kinetochore.<br>Cleavage furrow.<br>Midbody.<br>Cytoplasm $\hat{c}$ cell<br>cortex. |
| Q9DB15 | RM12_MOUSE 39S<br>ribosomal protein L12,<br>mitochondrial OS=Mus<br>musculus GN=Mrpl12 PE=1<br>SV=2                                        | 1.99E-04 | 20.2 | 12.4 | 2 (2 0 0 0 0) | Mitochondrion.                                                                                                                                                                                                                                         |
| Q8R429 | AT2A1_MOUSE<br>Sarcoplasmic/endoplasmic<br>reticulum calcium ATPase 1<br>OS=Mus musculus<br>GN=Atp2a1 PE=2 SV=1                            | 1.94E-09 | 20.2 | 2.8  | 7 (7 0 0 0 0) | Endoplasmic<br>reticulum<br>membrane; Multi-<br>pass membrane<br>protein.<br>Sarcoplasmic<br>reticulum<br>membrane; Multi-<br>pass membrane<br>protein.                                                                                                |
| P63037 | DNJA1_MOUSE DnaJ<br>homolog subfamily A<br>member 1 OS=Mus<br>musculus GN=Dnaja1 PE=1<br>SV=1                                              | 6.38E-08 | 20.2 | 6.5  | 2 (2 0 0 0 0) | Membrane; Lipid-<br>anchor.                                                                                                                                                                                                                            |
| Q91W92 | BORG5_MOUSE Cdc42<br>effector protein 1 OS=Mus<br>musculus GN=Cdc42ep1<br>PE=1 SV=1                                                        | 8.20E-10 | 20.2 | 4.6  | 2 (2 0 0 0 0) | Endomembrane<br>system; Peripheral<br>membrane protein.<br>Cytoplasm $\hat{c}$<br>cytoskeleton.                                                                                                                                                        |
| Q9DC69 | NDUA9_MOUSE NADH<br>dehydrogenase [ubiquinone]<br>1 alpha subcomplex subunit<br>9, mitochondrial OS=Mus<br>musculus GN=Ndufa9 PE=1<br>SV=1 | 1.84E-07 | 20.2 | 7.2  | 2 (2 0 0 0 0) | Mitochondrion<br>matrix.                                                                                                                                                                                                                               |
| P12970 | RL7A_MOUSE 60S<br>ribosomal protein L7a<br>OS=Mus musculus<br>GN=Rpl7a PE=2 SV=2                                                           | 6.99E-06 | 20.2 | 9.4  | 2 (2 0 0 0 0) | ND                                                                                                                                                                                                                                                     |
| Q501J7 | PHAR4_MOUSE<br>Phosphatase and actin<br>regulator 4 OS=Mus<br>musculus GN=Phactr4 PE=1<br>SV=2                                             | 3.11E-14 | 20.2 | 4.9  | 2 (2 0 0 0 0) | ND                                                                                                                                                                                                                                                     |

*A novel role of mitochondria in muscle injury*

|        |                                                                                                    |          |      |      |                 |                                                                                                                                                   |
|--------|----------------------------------------------------------------------------------------------------|----------|------|------|-----------------|---------------------------------------------------------------------------------------------------------------------------------------------------|
| O35704 | SPTC1_MOUSE Serine palmitoyltransferase 1 OS=Mus musculus GN=Sptlc1 PE=2 SV=1                      | 2.86E-05 | 20.2 | 4.9  | 2 (2 0 0 0 0)   | Endoplasmic reticulum membrane; Single-pass membrane protein.                                                                                     |
| Q501J6 | DDX17_MOUSE Probable ATP-dependent RNA helicase DDX17 OS=Mus musculus GN=Ddx17 PE=2 SV=1           | 7.82E-10 | 20.2 | 3.5  | 11 (11 0 0 0 0) | Nucleus.                                                                                                                                          |
| Q8CFE4 | SCYL2_MOUSE SCY1-like protein 2 OS=Mus musculus GN=Scyl2 PE=1 SV=1                                 | 2.59E-06 | 20.2 | 2.8  | 2 (2 0 0 0 0)   | Cytoplasm ° perinuclear region. Cytoplasmic vesicle ° clathrin-coated vesicle. Golgi apparatus ° trans-Golgi network membrane. Endosome membrane. |
| Q9D646 | KRT34_MOUSE Keratin, type I cuticular Ha4 OS=Mus musculus GN=Krt34 PE=2 SV=1                       | 6.49E-07 | 20.2 | 5.4  | 3 (3 0 0 0 0)   | ND                                                                                                                                                |
| Q9CZY2 | TPD54_MOUSE Tumor protein D54 OS=Mus musculus GN=Tpd52l2 PE=1 SV=1                                 | 2.69E-06 | 20.2 | 11.4 | 2 (2 0 0 0 0)   | ND                                                                                                                                                |
| P35980 | RL18_MOUSE 60S ribosomal protein L18 OS=Mus musculus GN=Rpl18 PE=2 SV=3                            | 3.93E-07 | 20.2 | 13.8 | 3 (3 0 0 0 0)   | Cytoplasm.                                                                                                                                        |
| Q61753 | SERA_MOUSE D-3-phosphoglycerate dehydrogenase OS=Mus musculus GN=Phgdh PE=1 SV=3                   | 1.28E-05 | 20.2 | 4.7  | 4 (4 0 0 0 0)   | ND                                                                                                                                                |
| Q8BTY2 | S4A7_MOUSE Sodium bicarbonate cotransporter 3 OS=Mus musculus GN=Slc4a7 PE=1 SV=2                  | 7.29E-08 | 20.2 | 2.9  | 2 (2 0 0 0 0)   | Basolateral cell membrane; Multi-pass membrane protein. Apical cell membrane; Multi-pass membrane protein. Cell projection ° stereocilium.        |
| Q60931 | VDAC3_MOUSE Voltage-dependent anion-selective channel protein 3 OS=Mus musculus GN=Vdac3 PE=1 SV=1 | 1.87E-08 | 20.2 | 8.5  | 5 (5 0 0 0 0)   | Mitochondrion outer membrane.                                                                                                                     |
| Q8R0X7 | SGPL1_MOUSE Sphingosine-1-phosphate lyase 1 OS=Mus musculus                                        | 3.03E-11 | 20.2 | 2.6  | 3 (3 0 0 0 0)   | Endoplasmic reticulum membrane; Single-                                                                                                           |

|        |                                                                                                            |          |      |      |               |                                                              |
|--------|------------------------------------------------------------------------------------------------------------|----------|------|------|---------------|--------------------------------------------------------------|
|        | GN=Sgpl1 PE=2 SV=1                                                                                         |          |      |      |               | pass type III membrane protein.                              |
| P14148 | RL7_MOUSE 60S ribosomal protein L7 OS=Mus musculus GN=Rpl7 PE=2 SV=2                                       | 4.12E-10 | 20.2 | 8.9  | 2 (2 0 0 0 0) | ND                                                           |
| P58021 | TM9S2_MOUSE Transmembrane 9 superfamily member 2 OS=Mus musculus GN=Tm9sf2 PE=2 SV=1                       | 8.39E-07 | 20.2 | 3.3  | 2 (2 0 0 0 0) | Endosome membrane; Multi-pass membrane protein.              |
| Q8BFR5 | EFTU_MOUSE Elongation factor Tu, mitochondrial OS=Mus musculus GN=Tufm PE=1 SV=1                           | 1.21E-08 | 20.2 | 5.5  | 3 (3 0 0 0 0) | Mitochondrion.                                               |
| Q9Z110 | P5CS_MOUSE Delta-1-pyrroline-5-carboxylate synthetase OS=Mus musculus GN=Aldh18a1 PE=2 SV=1                | 5.63E-09 | 20.2 | 2.5  | 7 (7 0 0 0 0) | Mitochondrion inner membrane.                                |
| Q6IMF0 | KRT83_MOUSE Keratin, type II cuticular Hb3 OS=Mus musculus GN=Krt83 PE=2 SV=2                              | 6.71E-05 | 20.2 | 1.8  | 3 (3 0 0 0 0) | ND                                                           |
| P59017 | B2L13_MOUSE Bcl-2-like protein 13 OS=Mus musculus GN=Bcl2l13 PE=1 SV=1                                     | 3.33E-06 | 20.2 | 5.1  | 3 (3 0 0 0 0) | Mitochondrion membrane; Single-pass membrane protein.        |
| Q9CXW2 | RT22_MOUSE 28S ribosomal protein S22, mitochondrial OS=Mus musculus GN=Mrps22 PE=2 SV=1                    | 2.69E-11 | 20.2 | 6.7  | 2 (2 0 0 0 0) | Mitochondrion.                                               |
| P62918 | RL8_MOUSE 60S ribosomal protein L8 OS=Mus musculus GN=Rpl8 PE=2 SV=2                                       | 9.65E-07 | 20.2 | 8.9  | 4 (4 0 0 0 0) | Cytoplasm.                                                   |
| Q5F2E7 | NUFP2_MOUSE Nuclear fragile X mental retardation-interacting protein 2 OS=Mus musculus GN=Nufip2 PE=1 SV=1 | 2.23E-06 | 20.2 | 3.9  | 2 (2 0 0 0 0) | Nucleus. Cytoplasm.                                          |
| P60335 | PCBP1_MOUSE Poly(rC)-binding protein 1 OS=Mus musculus GN=Pcbp1 PE=1 SV=1                                  | 2.27E-06 | 20.2 | 6.7  | 3 (3 0 0 0 0) | Nucleus.                                                     |
| P28667 | MRP_MOUSE MARCKS-related protein OS=Mus musculus GN=Marcks11 PE=1 SV=2                                     | 6.60E-07 | 20.2 | 14.0 | 2 (2 0 0 0 0) | ND                                                           |
| P11438 | LAMP1_MOUSE Lysosome-associated membrane glycoprotein 1 OS=Mus musculus                                    | 9.61E-07 | 20.2 | 5.7  | 3 (3 0 0 0 0) | Cell membrane; Single-pass type I membrane protein. Endosome |



|        |                                                                                                                                |          |      |     |                 |                                                                                                                                                 |
|--------|--------------------------------------------------------------------------------------------------------------------------------|----------|------|-----|-----------------|-------------------------------------------------------------------------------------------------------------------------------------------------|
|        | GN=Lamp1 PE=1 SV=2                                                                                                             |          |      |     |                 | membrane; Single-pass type I membrane protein. Lysosome membrane; Single-pass type I membrane protein.                                          |
| Q8C7K6 | PCYXL_MOUSE<br>Prenylcysteine oxidase-like<br>OS=Mus musculus<br>GN=Pcyox11 PE=2 SV=1                                          | 4.79E-05 | 20.2 | 5.1 | 3 (3 0 0 0 0)   | Secreted.                                                                                                                                       |
| P10493 | NID1_MOUSE Nidogen-1<br>OS=Mus musculus<br>GN=Nid1 PE=1 SV=1                                                                   | 6.11E-07 | 20.2 | 1.8 | 2 (2 0 0 0 0)   | Secreted $\hat{\epsilon}^{\circ}$ extracellular space $\hat{\epsilon}^{\circ}$ extracellular matrix $\hat{\epsilon}^{\circ}$ basement membrane. |
| Q99M74 | KRT82_MOUSE Keratin,<br>type II cuticular Hb2<br>OS=Mus musculus<br>GN=Krt82 PE=2 SV=1                                         | 6.72E-05 | 20.2 | 4.3 | 3 (3 0 0 0 0)   | ND                                                                                                                                              |
| P81117 | NUCB2_MOUSE<br>Nucleobindin-2 OS=Mus<br>musculus GN=Nucb2 PE=1<br>SV=2                                                         | 2.49E-06 | 20.2 | 5.2 | 2 (2 0 0 0 0)   | Perikaryon. Endoplasmic reticulum. Nucleus envelope.                                                                                            |
| Q00262 | STX2_MOUSE Syntaxin-2<br>OS=Mus musculus GN=Stx2<br>PE=2 SV=1                                                                  | 9.39E-07 | 20.2 | 6.6 | 2 (2 0 0 0 0)   | Membrane; Single-pass type IV membrane protein.                                                                                                 |
| P15331 | PERL_MOUSE Peripherin<br>OS=Mus musculus GN=Prph<br>PE=1 SV=2                                                                  | 9.40E-09 | 20.2 | 4.4 | 23 (23 0 0 0 0) | ND                                                                                                                                              |
| Q9WVE8 | PACN2_MOUSE Protein<br>kinase C and casein kinase<br>substrate in neurons protein<br>2 OS=Mus musculus<br>GN=Pacsin2 PE=2 SV=1 | 7.66E-08 | 20.2 | 4.1 | 2 (2 0 0 0 0)   | Cytoplasmic vesicle.                                                                                                                            |
| Q91VZ6 | SMAP1_MOUSE Stromal<br>membrane-associated protein<br>1 OS=Mus musculus<br>GN=Smap1 PE=1 SV=1                                  | 1.16E-06 | 20.2 | 2.5 | 2 (2 0 0 0 0)   | Cell membrane; Peripheral membrane protein; Cytoplasmic side.                                                                                   |
| Q8CIV2 | MBRL_MOUSE Membralin<br>OS=Mus musculus<br>GN=ORF61 PE=1 SV=2                                                                  | 1.33E-07 | 20.2 | 3.8 | 2 (2 0 0 0 0)   | Membrane; Multi-pass membrane protein.                                                                                                          |
| Q9R049 | AMFR_MOUSE Autocrine<br>motility factor receptor<br>OS=Mus musculus<br>GN=Amfr PE=1 SV=2                                       | 6.12E-08 | 20.2 | 3.7 | 2 (2 0 0 0 0)   | Endoplasmic reticulum membrane; Multi-pass membrane protein.                                                                                    |
| Q9WTQ8 | TIM23_MOUSE<br>Mitochondrial import inner<br>membrane translocase<br>subunit Tim23 OS=Mus<br>musculus GN=Timm23<br>PE=2 SV=1   | 4.94E-06 | 20.2 | 4.8 | 3 (3 0 0 0 0)   | Mitochondrion inner membrane; Multi-pass membrane protein.                                                                                      |
| Q6ZPF4 | FMNL3_MOUSE Formin-                                                                                                            | 9.63E-08 | 20.2 | 2.1 | 2 (2 0 0 0 0)   | ND                                                                                                                                              |

|        |                                                                                                 |          |      |      |               |                                                                                                                                                                                      |
|--------|-------------------------------------------------------------------------------------------------|----------|------|------|---------------|--------------------------------------------------------------------------------------------------------------------------------------------------------------------------------------|
|        | like protein 3 OS=Mus musculus GN=Fmnl3 PE=2 SV=2                                               |          |      |      |               |                                                                                                                                                                                      |
| O70378 | CX4NB_MOUSE Neighbor of COX4 OS=Mus musculus GN=Cox4nb PE=1 SV=1                                | 4.67E-06 | 20.2 | 10.1 | 2 (2 0 0 0 0) | ND                                                                                                                                                                                   |
| Q60865 | CAPR1_MOUSE Caprin-1 OS=Mus musculus GN=Caprin1 PE=1 SV=2                                       | 4.91E-07 | 20.2 | 3.1  | 2 (2 0 0 0 0) | Cytoplasmic cytosol. Cell projection dendrite.                                                                                                                                       |
| Q9DBG7 | SRPR_MOUSE Signal recognition particle receptor subunit alpha OS=Mus musculus GN=Srpr PE=1 SV=1 | 2.58E-05 | 20.1 | 3.9  | 2 (2 0 0 0 0) | Endoplasmic reticulum membrane; Peripheral membrane protein.                                                                                                                         |
| P61021 | RAB5B_MOUSE Ras-related protein Rab-5B OS=Mus musculus GN=Rab5b PE=1 SV=1                       | 4.29E-07 | 20.1 | 12.1 | 2 (2 0 0 0 0) | Cell membrane; Lipid-anchor; Cytoplasmic side. Early endosome membrane; Lipid-anchor. Melanosome.                                                                                    |
| Q791T5 | MTCH1_MOUSE Mitochondrial carrier homolog 1 OS=Mus musculus GN=Mtch1 PE=1 SV=1                  | 4.85E-07 | 20.1 | 2.8  | 2 (2 0 0 0 0) | Mitochondrion inner membrane; Multi-pass membrane protein.                                                                                                                           |
| Q61712 | DNJC1_MOUSE DnaJ homolog subfamily C member 1 OS=Mus musculus GN=Dnajc1 PE=1 SV=1               | 1.05E-04 | 20.1 | 3.8  | 2 (2 0 0 0 0) | Endoplasmic reticulum membrane; Single-pass type I membrane protein. Nucleus membrane; Single-pass type I membrane protein. Microsome membrane; Single-pass type I membrane protein. |
| Q9CZW5 | TOM70_MOUSE Mitochondrial import receptor subunit TOM70 OS=Mus musculus GN=Tomm70a PE=1 SV=1    | 2.08E-07 | 20.1 | 3.3  | 4 (4 0 0 0 0) | Mitochondrion outer membrane; Single-pass membrane protein.                                                                                                                          |
| Q9D8V0 | HM13_MOUSE Minor histocompatibility antigen H13 OS=Mus musculus GN=Hm13 PE=1 SV=1               | 2.73E-06 | 20.1 | 3.2  | 2 (2 0 0 0 0) | Endoplasmic reticulum membrane; Multi-pass membrane protein. Cell membrane; Multi-pass membrane protein.                                                                             |

*A novel role of mitochondria in muscle injury*

|        |                                                                                                                             |          |      |      |                 |                                                                                                                      |
|--------|-----------------------------------------------------------------------------------------------------------------------------|----------|------|------|-----------------|----------------------------------------------------------------------------------------------------------------------|
| Q61696 | HS71A_MOUSE Heat shock 70 kDa protein 1A OS=Mus musculus GN=Hspa1a PE=1 SV=2                                                | 1.01E-10 | 20.1 | 3.4  | 16 (16 0 0 0 0) | Cytoplasm.                                                                                                           |
| Q3TDQ1 | STT3B_MOUSE Dolichyl-diphosphooligosaccharide--protein glycosyltransferase subunit STT3B OS=Mus musculus GN=Stt3b PE=1 SV=2 | 1.37E-07 | 20.1 | 2.8  | 2 (2 0 0 0 0)   | Endoplasmic reticulum membrane; Multi-pass membrane protein.                                                         |
| Q09143 | CTR1_MOUSE High affinity cationic amino acid transporter 1 OS=Mus musculus GN=Slc7a1 PE=2 SV=1                              | 1.01E-07 | 20.1 | 1.8  | 5 (5 0 0 0 0)   | Membrane; Multi-pass membrane protein.                                                                               |
| Q9QZ23 | NFU1_MOUSE NFU1 iron-sulfur cluster scaffold homolog, mitochondrial OS=Mus musculus GN=Nfu1 PE=1 SV=2                       | 4.14E-07 | 20.1 | 4.7  | 2 (2 0 0 0 0)   | Mitochondrion. Cytoplasm & cytosol.                                                                                  |
| Q9CR23 | TMEM9_MOUSE Transmembrane protein 9 OS=Mus musculus GN=Tmem9 PE=2 SV=1                                                      | 9.90E-08 | 20.1 | 7.1  | 3 (3 0 0 0 0)   | Late endosome membrane; Single-pass type I membrane protein. Lysosome membrane; Single-pass type I membrane protein. |
| P08074 | CBR2_MOUSE Carbonyl reductase [NADPH] 2 OS=Mus musculus GN=Cbr2 PE=1 SV=1                                                   | 1.13E-05 | 20.1 | 4.5  | 2 (2 0 0 0 0)   | Mitochondrion matrix.                                                                                                |
| Q9EP69 | SAC1_MOUSE Phosphatidylinositide phosphatase SAC1 OS=Mus musculus GN=Sacm11 PE=2 SV=1                                       | 1.46E-07 | 20.1 | 3.4  | 2 (2 0 0 0 0)   | Endoplasmic reticulum membrane; Multi-pass membrane protein.                                                         |
| Q60870 | REEP5_MOUSE Receptor expression-enhancing protein 5 OS=Mus musculus GN=Reep5 PE=1 SV=1                                      | 4.68E-04 | 20.1 | 11.4 | 2 (2 0 0 0 0)   | Membrane; Multi-pass membrane protein.                                                                               |
| Q9CY50 | SSRA_MOUSE Translocon-associated protein subunit alpha OS=Mus musculus GN=Ssr1 PE=1 SV=1                                    | 9.06E-06 | 20.1 | 8.0  | 2 (2 0 0 0 0)   | Endoplasmic reticulum membrane; Single-pass type I membrane protein.                                                 |
| Q8BI84 | MIA3_MOUSE Melanoma inhibitory activity protein 3 OS=Mus musculus GN=Mia3 PE=1 SV=2                                         | 1.08E-04 | 20.1 | 1.2  | 2 (2 0 0 0 0)   | Endoplasmic reticulum membrane; Single-pass type I membrane protein.                                                 |
| Q62523 | ZYX_MOUSE Zyxin OS=Mus musculus GN=Zyx PE=1 SV=1                                                                            | 1.01E-09 | 20.1 | 3.9  | 2 (2 0 0 0 0)   | Cytoplasm. Cytoplasm & cytoskeleton. Cell junction & focal                                                           |

*A novel role of mitochondria in muscle injury*

|        |                                                                                                            |          |      |      |                |                                                                                                                                                                   |
|--------|------------------------------------------------------------------------------------------------------------|----------|------|------|----------------|-------------------------------------------------------------------------------------------------------------------------------------------------------------------|
|        |                                                                                                            |          |      |      |                | adhesion. Nucleus.                                                                                                                                                |
| Q80U93 | NU214_MOUSE Nuclear pore complex protein Nup214 OS=Mus musculus GN=Nup214 PE=1 SV=2                        | 2.65E-05 | 20.1 | 0.5  | 2 (2 0 0 0 0)  | Nucleus &#x2013; nuclear pore complex.                                                                                                                            |
| Q6ZWN5 | RS9_MOUSE 40S ribosomal protein S9 OS=Mus musculus GN=Rps9 PE=2 SV=3                                       | 9.67E-05 | 20.1 | 9.8  | 2 (2 0 0 0 0)  | Cytoplasm.                                                                                                                                                        |
| Q9R1J0 | NSDHL_MOUSE Sterol-4-alpha-carboxylate 3-dehydrogenase, decarboxylating OS=Mus musculus GN=Nsdhl PE=2 SV=1 | 5.39E-07 | 20.1 | 6.6  | 3 (3 0 0 0 0)  | Membrane; Single-pass membrane protein.                                                                                                                           |
| Q9D1N9 | RM21_MOUSE 39S ribosomal protein L21, mitochondrial OS=Mus musculus GN=Mrpl21 PE=2 SV=1                    | 9.86E-06 | 20.1 | 9.1  | 2 (2 0 0 0 0)  | Mitochondrion.                                                                                                                                                    |
| Q6PHN9 | RAB35_MOUSE Ras-related protein Rab-35 OS=Mus musculus GN=Rab35 PE=1 SV=1                                  | 8.09E-07 | 20.1 | 11.9 | 2 (2 0 0 0 0)  | Cell membrane; Lipid-anchor; Cytoplasmic side. Membrane &#x2013; clathrin-coated pit. Cytoplasmic vesicle &#x2013; clathrin-coated vesicle. Endosome. Melanosome. |
| Q9CQU3 | RER1_MOUSE Protein RER1 OS=Mus musculus GN=Rer1 PE=1 SV=1                                                  | 1.60E-05 | 20.1 | 11.2 | 2 (2 0 0 0 0)  | Golgi apparatus membrane; Multi-pass membrane protein.                                                                                                            |
| Q5SXY1 | CYTSB_MOUSE Cytospin-B OS=Mus musculus GN=Cytsb PE=1 SV=2                                                  | 6.33E-05 | 20.1 | 0.9  | 2 (2 0 0 0 0)  | Nucleus.                                                                                                                                                          |
| Q3TLH4 | BA2D1_MOUSE BAT2 domain-containing protein 1 OS=Mus musculus GN=Bat2d1 PE=1 SV=2                           | 3.39E-05 | 20.1 | 0.7  | 2 (2 0 0 0 0)  | ND                                                                                                                                                                |
| P62267 | RS23_MOUSE 40S ribosomal protein S23 OS=Mus musculus GN=Rps23 PE=2 SV=3                                    | 3.27E-08 | 20.1 | 15.4 | 2 (2 0 0 0 0)  | ND                                                                                                                                                                |
| P70403 | CASP_MOUSE Protein CASP OS=Mus musculus GN=Cux1 PE=2 SV=2                                                  | 1.42E-05 | 20.1 | 3.1  | 2 (2 0 0 0 0)  | Golgi apparatus membrane; Single-pass type IV membrane protein.                                                                                                   |
| Q8BGZ7 | K2C75_MOUSE Keratin, type II cytoskeletal 75 OS=Mus musculus GN=Krt75 PE=1 SV=1                            | 2.33E-10 | 18.3 | 6.7  | 16 (3 9 4 0 0) | ND                                                                                                                                                                |

*A novel role of mitochondria in muscle injury*

|        |                                                                                |          |      |      |               |                           |
|--------|--------------------------------------------------------------------------------|----------|------|------|---------------|---------------------------|
| P35700 | PRDX1_MOUSE<br>Peroxisredoxin-1 OS=Mus<br>musculus GN=Prdx1 PE=1<br>SV=1       | 2.83E-05 | 18.1 | 11.6 | 4 (1 3 0 0 0) | Cytoplasm.<br>Melanosome. |
| Q3UIW5 | RNF10_MOUSE RING<br>finger protein 10 OS=Mus<br>musculus GN=Rnf10 PE=2<br>SV=2 | 3.31E-04 | 16.1 | 1.1  | 2 (0 2 0 0 0) | Cytoplasm.<br>Nucleus.    |

**Table s3**

| <b>Accession</b> | <b>Reference</b>                                                                                                                  | <b>P (pro)</b> | <b>Score</b> | <b>Coverage</b> | <b>Peptide (Hits)</b> | <b>Subcellular locations</b>                                            |
|------------------|-----------------------------------------------------------------------------------------------------------------------------------|----------------|--------------|-----------------|-----------------------|-------------------------------------------------------------------------|
| Q9CQV8           | 1433B_MOUSE 14-3-3 protein beta/alpha OS=Mus musculus GN=Ywhab PE=1 SV=3                                                          | 1.1E-13        | 96.2         | 34.6            | 10 (8 2 0 0 0)        | Cytoplasm. Melanosome.                                                  |
| P62259           | 1433E_MOUSE 14-3-3 protein epsilon OS=Mus musculus GN=Ywhae PE=1 SV=1                                                             | 9.3E-13        | 110.3        | 45.9            | 14 (14 0 0 0 0)       | Cytoplasm. Melanosome.                                                  |
| P68510           | 1433F_MOUSE 14-3-3 protein eta OS=Mus musculus GN=Ywhah PE=1 SV=2                                                                 | 1.1E-09        | 40.2         | 18.7            | 4 (4 0 0 0 0)         | Cytoplasm.                                                              |
| P61982           | 1433G_MOUSE 14-3-3 protein gamma OS=Mus musculus GN=Ywhag PE=1 SV=2                                                               | 1.2E-09        | 40.2         | 14.2            | 4 (4 0 0 0 0)         | Cytoplasm.                                                              |
| P68254           | 1433T_MOUSE 14-3-3 protein theta OS=Mus musculus GN=Ywhaq PE=1 SV=1                                                               | 1.5E-12        | 20.3         | 13.1            | 3 (3 0 0 0 0)         | Cytoplasm.                                                              |
| P63101           | 1433Z_MOUSE 14-3-3 protein zeta/delta OS=Mus musculus GN=Ywhaz PE=1 SV=1                                                          | 2.2E-12        | 70.3         | 29.0            | 7 (7 0 0 0 0)         | Cytoplasm. Melanosome.                                                  |
| Q76MZ3           | 2AAA_MOUSE Serine/threonine-protein phosphatase 2A 65 kDa regulatory subunit A alpha isoform OS=Mus musculus GN=Ppp2r1a PE=1 SV=3 | 1.1E-14        | 60.3         | 13.8            | 11 (11 0 0 0 0)       | Cytoplasm. Chromosome centromere.                                       |
| P10852           | 4F2_MOUSE 4F2 cell-surface antigen heavy chain OS=Mus musculus GN=Slc3a2 PE=1 SV=1                                                | 5.0E-14        | 170.3        | 37.6            | 118 (118 0 0 0 0)     | Apical cell membrane; Single-pass type II membrane protein. Melanosome. |
| Q571I9           | A16A1_MOUSE Aldehyde dehydrogenase family 16 member A1 OS=Mus musculus GN=Aldh16a1 PE=2 SV=2                                      | 9.1E-06        | 20.1         | 3.7             | 3 (3 0 0 0 0)         | ND                                                                      |
| P51912           | AAAT_MOUSE Neutral amino acid transporter B(0) OS=Mus musculus GN=Slc1a5 PE=2 SV=2                                                | 4.9E-13        | 80.3         | 14.6            | 23 (23 0 0 0 0)       | Membrane; Multi-pass membrane protein. Melanosome.                      |
| Q5EG47           | AAPK1_MOUSE 5'-AMP-activated protein kinase catalytic subunit alpha-1 OS=Mus musculus GN=Prkaa1 PE=1 SV=2                         | 1.3E-06        | 30.2         | 6.6             | 4 (4 0 0 0 0)         | ND                                                                      |

|        |                                                                                                           |         |       |      |                 |                                                   |
|--------|-----------------------------------------------------------------------------------------------------------|---------|-------|------|-----------------|---------------------------------------------------|
| P05202 | AATM_MOUSE Aspartate aminotransferase, mitochondrial OS=Mus musculus GN=Got2 PE=1 SV=1                    | 3.3E-09 | 60.2  | 19.1 | 8 (8 0 0 0 0)   | Mitochondrion matrix. Cell membrane.              |
| P55096 | ABCD3_MOUSE ATP-binding cassette sub-family D member 3 OS=Mus musculus GN=Abcd3 PE=1 SV=1                 | 4.3E-14 | 90.2  | 14.6 | 9 (9 0 0 0 0)   | Peroxisome membrane; Multi-pass membrane protein. |
| P61222 | ABCE1_MOUSE ATP-binding cassette sub-family E member 1 OS=Mus musculus GN=Abce1 PE=2 SV=1                 | 5.5E-09 | 20.2  | 4.0  | 2 (2 0 0 0 0)   | Cytoplasm. Mitochondrion.                         |
| Q7TMS5 | ABCG2_MOUSE ATP-binding cassette sub-family G member 2 OS=Mus musculus GN=Abcg2 PE=2 SV=1                 | 3.6E-08 | 40.2  | 6.7  | 7 (7 0 0 0 0)   | Cell membrane; Multi-pass membrane protein.       |
| Q8R2Y0 | ABHD6_MOUSE Monoacylglycerol lipase ABHD6 OS=Mus musculus GN=Abhd6 PE=2 SV=1                              | 3.7E-06 | 20.2  | 7.4  | 2 (2 0 0 0 0)   | Membrane; Single-pass type II membrane protein.   |
| Q5SSL4 | ABR_MOUSE Active breakpoint cluster region-related protein OS=Mus musculus GN=Abr PE=2 SV=1               | 1.1E-05 | 30.1  | 3.6  | 3 (3 0 0 0 0)   | ND                                                |
| Q5SWU9 | ACACA_MOUSE Acetyl-CoA carboxylase 1 OS=Mus musculus GN=Acaca PE=1 SV=1                                   | 1.1E-16 | 570.4 | 27.5 | 94 (94 0 0 0 0) | Cytoplasm.                                        |
| Q8JZN5 | ACAD9_MOUSE Acyl-CoA dehydrogenase family member 9, mitochondrial OS=Mus musculus GN=Acad9 PE=2 SV=1      | 1.5E-10 | 20.2  | 4.5  | 2 (2 0 0 0 0)   | Mitochondrion.                                    |
| P51174 | ACADL_MOUSE Long-chain specific acyl-CoA dehydrogenase, mitochondrial OS=Mus musculus GN=Acadl PE=2 SV=2  | 2.7E-10 | 50.2  | 13.3 | 6 (6 0 0 0 0)   | Mitochondrion matrix.                             |
| Q07417 | ACADS_MOUSE Short-chain specific acyl-CoA dehydrogenase, mitochondrial OS=Mus musculus GN=Acads PE=2 SV=1 | 5.2E-06 | 20.2  | 7.3  | 2 (2 0 0 0 0)   | Mitochondrion matrix.                             |
| P50544 | ACADV_MOUSE Very long-chain specific acyl-CoA dehydrogenase, mitochondrial OS=Mus musculus GN=Acadv1 PE=1 | 1.6E-11 | 50.3  | 12.0 | 5 (5 0 0 0 0)   | Mitochondrion inner membrane.                     |

*A novel role of mitochondria in muscle injury*

|        |                                                                                    |         |       |      |                 |                                                                                                                                                                                                                                                                    |  |
|--------|------------------------------------------------------------------------------------|---------|-------|------|-----------------|--------------------------------------------------------------------------------------------------------------------------------------------------------------------------------------------------------------------------------------------------------------------|--|
|        | SV=3                                                                               |         |       |      |                 |                                                                                                                                                                                                                                                                    |  |
| Q91V92 | ACLY_MOUSE ATP-citrate synthase OS=Mus musculus GN=Acly PE=1 SV=1                  | 6.2E-06 | 30.2  | 3.1  | 3 (3 0 0 0 0)   | Cytoplasm.                                                                                                                                                                                                                                                         |  |
| P13516 | ACOD1_MOUSE Acyl-CoA desaturase 1 OS=Mus musculus GN=Scd1 PE=2 SV=2                | 6.6E-09 | 20.1  | 6.2  | 3 (3 0 0 0 0)   | Endoplasmic reticulum membrane; Multi-pass membrane protein.                                                                                                                                                                                                       |  |
| Q99KI0 | ACON_MOUSE Aconitate hydratase, mitochondrial OS=Mus musculus GN=Aco2 PE=1 SV=1    | 1.1E-16 | 212.4 | 27.7 | 36 (33 2 1 0 0) | Mitochondrion.                                                                                                                                                                                                                                                     |  |
| Q9CZW4 | ACSL3_MOUSE Long-chain-fatty-acid--CoA ligase 3 OS=Mus musculus GN=Acsl3 PE=2 SV=1 | 2.2E-15 | 80.2  | 14.6 | 9 (9 0 0 0 0)   | Mitochondrion outer membrane; Single-pass type III membrane protein. Peroxisome membrane; Single-pass type III membrane protein. Microsome membrane; Single-pass type III membrane protein. Endoplasmic reticulum membrane; Single-pass type III membrane protein. |  |
| Q9QUJ7 | ACSL4_MOUSE Long-chain-fatty-acid--CoA ligase 4 OS=Mus musculus GN=Acsl4 PE=2 SV=1 | 1.1E-15 | 30.2  | 6.5  | 5 (5 0 0 0 0)   | Mitochondrion outer membrane; Single-pass type III membrane protein. Peroxisome membrane; Single-pass type III membrane protein. Microsome membrane; Single-pass type III membrane protein. Endoplasmic reticulum membrane; Single-pass type III membrane protein. |  |
| P62737 | ACTA_MOUSE Actin, aortic smooth muscle OS=Mus musculus GN=Acta2 PE=1 SV=1          | 1.0E-30 | 286.3 | 57.6 | 66 (64 2 0 0 0) | Cytoplasm &° cytoskeleton.                                                                                                                                                                                                                                         |  |
| P60710 | ACTB_MOUSE Actin, cytoplasmic 1 OS=Mus                                             | 8.3E-14 | 90.3  | 24.0 | 32 (32 0 0 0 0) | Cytoplasm &° cytoskeleton.                                                                                                                                                                                                                                         |  |



|        |                                                                                                                |         |       |      |                  |                                                                                                                     |
|--------|----------------------------------------------------------------------------------------------------------------|---------|-------|------|------------------|---------------------------------------------------------------------------------------------------------------------|
|        | musculus GN=Actb PE=1 SV=1                                                                                     |         |       |      |                  |                                                                                                                     |
| Q8BFZ3 | ACTBL_MOUSE Beta-actin-like protein 2 OS=Mus musculus GN=Actbl2 PE=2 SV=1                                      | 1.0E-30 | 46.4  | 15.7 | 28 (11 17 0 0 0) | Cytoplasm &° cytoskeleton.                                                                                          |
| Q7TPR4 | ACTN1_MOUSE Alpha-actinin-1 OS=Mus musculus GN=Actn1 PE=2 SV=1                                                 | 2.3E-12 | 190.3 | 22.3 | 24 (24 0 0 0 0)  | Cytoplasm &° cytoskeleton. Cytoplasm &° myofibril &° sarcomere &° Z line. Cell membrane. Cell projection &° ruffle. |
| Q9JI91 | ACTN2_MOUSE Alpha-actinin-2 OS=Mus musculus GN=Actn2 PE=1 SV=1                                                 | 6.6E-07 | 20.2  | 1.1  | 3 (3 0 0 0 0)    | Cytoplasm &° myofibril &° sarcomere &° Z line.                                                                      |
| P57780 | ACTN4_MOUSE Alpha-actinin-4 OS=Mus musculus GN=Actn4 PE=1 SV=1                                                 | 1.2E-11 | 60.3  | 10.3 | 7 (7 0 0 0 0)    | Nucleus. Cytoplasm.                                                                                                 |
| O35598 | ADA10_MOUSE Disintegrin and metalloproteinase domain-containing protein 10 OS=Mus musculus GN=Adam10 PE=1 SV=1 | 9.4E-09 | 40.2  | 5.2  | 7 (7 0 0 0 0)    | Membrane; Single-pass type I membrane protein.                                                                      |
| Q9Z0F8 | ADA17_MOUSE Disintegrin and metalloproteinase domain-containing protein 17 OS=Mus musculus GN=Adam17 PE=1 SV=2 | 3.5E-06 | 20.1  | 2.4  | 4 (4 0 0 0 0)    | Cell membrane; Single-pass type I membrane protein. Secreted.                                                       |
| Q8VDL4 | ADPGK_MOUSE ADP-dependent glucokinase OS=Mus musculus GN=Adpgk PE=1 SV=2                                       | 1.7E-10 | 60.2  | 14.9 | 6 (6 0 0 0 0)    | Secreted.                                                                                                           |
| P48962 | ADT1_MOUSE ADP/ATP translocase 1 OS=Mus musculus GN=Slc25a4 PE=1 SV=4                                          | 4.8E-11 | 108.2 | 32.9 | 25 (24 1 0 0 0)  | Mitochondrion inner membrane; Multi-pass membrane protein.                                                          |
| P51881 | ADT2_MOUSE ADP/ATP translocase 2 OS=Mus musculus GN=Slc25a5 PE=1 SV=3                                          | 3.6E-10 | 48.2  | 11.4 | 22 (21 1 0 0 0)  | Mitochondrion inner membrane; Multi-pass membrane protein.                                                          |
| Q920A7 | AFG31_MOUSE AFG3-like protein 1 OS=Mus musculus GN=Afg311 PE=2 SV=2                                            | 7.1E-05 | 30.2  | 4.1  | 3 (3 0 0 0 0)    | Mitochondrion membrane; Multi-pass membrane protein.                                                                |
| Q8JZQ2 | AFG32_MOUSE AFG3-like protein 2 OS=Mus musculus GN=Afg312 PE=1 SV=1                                            | 4.1E-08 | 30.1  | 4.1  | 3 (3 0 0 0 0)    | Mitochondrion membrane; Multi-pass membrane protein.                                                                |

|        |                                                                                                                                         |         |       |      |                 |                                                                                                                                  |
|--------|-----------------------------------------------------------------------------------------------------------------------------------------|---------|-------|------|-----------------|----------------------------------------------------------------------------------------------------------------------------------|
| Q8K2K6 | AGFG1_MOUSE Arf-GAP domain and FG repeats-containing protein 1<br>OS=Mus musculus<br>GN=Agfg1 PE=1 SV=2                                 | 3.9E-11 | 20.2  | 5.3  | 2 (2 0 0 0 0)   | Nucleus.<br>Cytoplasmic vesicle.                                                                                                 |
| Q9Z0X1 | AIFM1_MOUSE Apoptosis-inducing factor 1,<br>mitochondrial OS=Mus musculus<br>GN=Aifm1 PE=1 SV=1                                         | 3.9E-12 | 110.2 | 23.5 | 17 (17 0 0 0 0) | Mitochondrion intermembrane space.<br>Mitochondrion inner membrane.<br>Cytoplasm.<br>Cytoplasmic perinuclear region.<br>Nucleus. |
| Q8R010 | AIMP2_MOUSE Aminoacyl tRNA synthetase complex-interacting multifunctional protein 2 OS=Mus musculus<br>GN=Aimp2 PE=1 SV=1               | 9.2E-08 | 20.2  | 11.6 | 3 (3 0 0 0 0)   | Cytoplasmic cytosol. Nucleus.                                                                                                    |
| Q9DBR0 | AKAP8_MOUSE A-kinase anchor protein 8 OS=Mus musculus<br>GN=Akap8 PE=1 SV=1                                                             | 5.9E-07 | 30.1  | 4.9  | 3 (3 0 0 0 0)   | Nucleus matrix.                                                                                                                  |
| Q3V0J1 | AL2S4_MOUSE Amyotrophic lateral sclerosis 2 chromosomal region candidate gene 4 protein homolog OS=Mus musculus<br>GN=Als2cr4 PE=2 SV=1 | 1.4E-10 | 20.2  | 7.3  | 2 (2 0 0 0 0)   | Membrane; Multi-pass membrane protein.                                                                                           |
| P47740 | AL3A2_MOUSE Fatty aldehyde dehydrogenase OS=Mus musculus<br>GN=Aldh3a2 PE=2 SV=1                                                        | 3.3E-08 | 40.2  | 8.5  | 4 (4 0 0 0 0)   | Endoplasmic reticulum membrane; Single-pass membrane protein; Cytoplasmic side.                                                  |
| P07724 | ALBU_MOUSE Serum albumin OS=Mus musculus<br>GN=Alb PE=1 SV=3                                                                            | 5.8E-10 | 20.2  | 4.3  | 30 (30 0 0 0 0) | Secreted.                                                                                                                        |
| P47738 | ALDH2_MOUSE Aldehyde dehydrogenase, mitochondrial OS=Mus musculus<br>GN=Aldh2 PE=1 SV=1                                                 | 6.9E-11 | 70.3  | 19.7 | 7 (7 0 0 0 0)   | Mitochondrion matrix.                                                                                                            |
| P05064 | ALDOA_MOUSE Fructose-bisphosphate aldolase A OS=Mus musculus<br>GN=Aldoa PE=1 SV=2                                                      | 1.1E-15 | 50.3  | 16.5 | 7 (7 0 0 0 0)   | ND                                                                                                                               |
| P45376 | ALDR_MOUSE Aldose reductase OS=Mus musculus<br>GN=Akr1b1 PE=1 SV=3                                                                      | 1.6E-08 | 20.2  | 7.9  | 2 (2 0 0 0 0)   | Cytoplasm.                                                                                                                       |
| Q9DB25 | ALG5_MOUSE Dolichyl-phosphate beta-glucosyltransferase OS=Mus musculus<br>GN=Alg5 PE=2 SV=1                                             | 1.1E-07 | 30.2  | 12.3 | 3 (3 0 0 0 0)   | Endoplasmic reticulum membrane; Single-pass type II membrane protein.                                                            |

|        |                                                                                                  |         |       |      |                   |                                                                                                                                                                          |
|--------|--------------------------------------------------------------------------------------------------|---------|-------|------|-------------------|--------------------------------------------------------------------------------------------------------------------------------------------------------------------------|
| Q9CPY7 | AMPL_MOUSE Cytosol aminopeptidase OS=Mus musculus GN=Lap3 PE=1 SV=3                              | 4.3E-07 | 30.2  | 7.3  | 3 (3 0 0 0 0)     | Cytoplasm.                                                                                                                                                               |
| P55302 | AMRP_MOUSE Alpha-2-macroglobulin receptor-associated protein OS=Mus musculus GN=Lrpap1 PE=1 SV=1 | 2.5E-07 | 30.2  | 10.0 | 3 (3 0 0 0 0)     | Endoplasmic reticulum. Cytoplasm. Cell surface.                                                                                                                          |
| Q9JHZ2 | ANKH_MOUSE Progressive ankylosis protein OS=Mus musculus GN=Ankh PE=2 SV=1                       | 4.6E-10 | 50.3  | 11.8 | 5 (5 0 0 0 0)     | Membrane; Multi-pass membrane protein.                                                                                                                                   |
| Q6P9J9 | ANO6_MOUSE Anoctamin-6 OS=Mus musculus GN=Ano6 PE=1 SV=1                                         | 1.8E-12 | 90.2  | 11.1 | 19 (19 0 0 0 0)   | Membrane; Multi-pass membrane protein.                                                                                                                                   |
| Q6VVW5 | ANPRB_MOUSE Atrial natriuretic peptide receptor B OS=Mus musculus GN=Npr2 PE=2 SV=1              | 7.8E-12 | 30.2  | 4.1  | 4 (4 0 0 0 0)     | Membrane; Single-pass type I membrane protein.                                                                                                                           |
| P97384 | ANX11_MOUSE Annexin A11 OS=Mus musculus GN=Anxa11 PE=1 SV=1                                      | 2.1E-10 | 88.3  | 20.3 | 13 (12 1 0 0 0)   | Cytoplasm. Melanosome. Nucleus envelope. Nucleus $\hat{\epsilon}^{\circ}$ nucleoplasm. Cytoplasm $\hat{\epsilon}^{\circ}$ cytoskeleton $\hat{\epsilon}^{\circ}$ spindle. |
| P10107 | ANXA1_MOUSE Annexin A1 OS=Mus musculus GN=Anxa1 PE=1 SV=2                                        | 4.2E-14 | 250.3 | 55.2 | 114 (114 0 0 0 0) | Nucleus. Cytoplasm. Cell projection $\hat{\epsilon}^{\circ}$ cilium. Basolateral cell membrane.                                                                          |
| P07356 | ANXA2_MOUSE Annexin A2 OS=Mus musculus GN=Anxa2 PE=1 SV=2                                        | 1.1E-15 | 260.3 | 53.7 | 114 (114 0 0 0 0) | Secreted $\hat{\epsilon}^{\circ}$ extracellular space $\hat{\epsilon}^{\circ}$ extracellular matrix $\hat{\epsilon}^{\circ}$ basement membrane. Melanosome.              |
| O35639 | ANXA3_MOUSE Annexin A3 OS=Mus musculus GN=Anxa3 PE=2 SV=3                                        | 1.2E-14 | 230.3 | 54.8 | 32 (32 0 0 0 0)   | ND                                                                                                                                                                       |
| P97429 | ANXA4_MOUSE Annexin A4 OS=Mus musculus GN=Anxa4 PE=2 SV=3                                        | 1.1E-11 | 140.3 | 40.1 | 29 (29 0 0 0 0)   | ND                                                                                                                                                                       |
| P48036 | ANXA5_MOUSE Annexin A5 OS=Mus musculus GN=Anxa5 PE=1 SV=1                                        | 2.2E-15 | 230.3 | 68.0 | 65 (65 0 0 0 0)   | ND                                                                                                                                                                       |
| P14824 | ANXA6_MOUSE Annexin A6 OS=Mus musculus GN=Anxa6 PE=1 SV=2                                        | 2.2E-16 | 616.3 | 58.1 | 243 (241 2 0 0 0) | Cytoplasm. Melanosome.                                                                                                                                                   |
| Q07076 | ANXA7_MOUSE Annexin A7 OS=Mus musculus GN=Anxa7 PE=2 SV=1                                        | 4.1E-09 | 100.2 | 20.1 | 13 (13 0 0 0 0)   | ND                                                                                                                                                                       |

*A novel role of mitochondria in muscle injury*

|        |                                                                                                    |         |       |      |                 |                                                                                                                                                                     |
|--------|----------------------------------------------------------------------------------------------------|---------|-------|------|-----------------|---------------------------------------------------------------------------------------------------------------------------------------------------------------------|
| Q64133 | AOFA_MOUSE Amine oxidase [flavin-containing] A<br>OS=Mus musculus<br>GN=Maoa PE=1 SV=2             | 1.3E-10 | 40.2  | 10.3 | 5 (5 0 0 0 0)   | Mitochondrion outer membrane;<br>Single-pass type IV membrane protein;<br>Cytoplasmic side.                                                                         |
| O35643 | AP1B1_MOUSE AP-1 complex subunit beta-1<br>OS=Mus musculus<br>GN=Ap1b1 PE=1 SV=1                   | 2.0E-07 | 30.2  | 4.1  | 3 (3 0 0 0 0)   | Golgi apparatus.<br>Cytoplasmic vesicle $\hat{\epsilon}$ clathrin-coated vesicle membrane;<br>Peripheral membrane protein;<br>Cytoplasmic side.<br>Golgi apparatus. |
| P22892 | AP1G1_MOUSE AP-1 complex subunit gamma-1<br>OS=Mus musculus<br>GN=Ap1g1 PE=1 SV=3                  | 4.1E-06 | 20.2  | 2.4  | 2 (2 0 0 0 0)   | Golgi apparatus.<br>Cytoplasmic vesicle $\hat{\epsilon}$ clathrin-coated vesicle membrane;<br>Peripheral membrane protein;<br>Cytoplasmic side.                     |
| P17426 | AP2A1_MOUSE AP-2 complex subunit alpha-1<br>OS=Mus musculus<br>GN=Ap2a1 PE=1 SV=1                  | 1.3E-11 | 118.3 | 12.3 | 12 (11 1 0 0 0) | Cell membrane.<br>Membrane $\hat{\epsilon}$ coated pit;<br>Peripheral membrane protein;<br>Cytoplasmic side.                                                        |
| P17427 | AP2A2_MOUSE AP-2 complex subunit alpha-2<br>OS=Mus musculus<br>GN=Ap2a2 PE=1 SV=1                  | 8.7E-10 | 60.2  | 8.3  | 6 (6 0 0 0 0)   | Cell membrane.<br>Membrane $\hat{\epsilon}$ coated pit;<br>Peripheral membrane protein;<br>Cytoplasmic side.                                                        |
| Q9DBG3 | AP2B1_MOUSE AP-2 complex subunit beta<br>OS=Mus musculus<br>GN=Ap2b1 PE=1 SV=1                     | 7.8E-15 | 30.2  | 4.4  | 3 (3 0 0 0 0)   | Cell membrane.<br>Membrane $\hat{\epsilon}$ coated pit;<br>Peripheral membrane protein;<br>Cytoplasmic side.                                                        |
| Q9D7N9 | APMAP_MOUSE Adipocyte plasma membrane-associated protein<br>OS=Mus musculus<br>GN=Apmmap PE=1 SV=1 | 1.3E-06 | 40.2  | 12.0 | 5 (5 0 0 0 0)   | Membrane; Single-pass type II membrane protein.                                                                                                                     |
| Q78IK4 | APOOL_MOUSE Apolipoprotein O-like<br>OS=Mus musculus<br>GN=Apool PE=2 SV=1                         | 3.1E-08 | 30.2  | 10.2 | 3 (3 0 0 0 0)   | Secreted.                                                                                                                                                           |
| P84078 | ARF1_MOUSE ADP-ribosylation factor 1<br>OS=Mus musculus GN=Arf1<br>PE=1 SV=2                       | 5.2E-10 | 50.2  | 24.3 | 5 (5 0 0 0 0)   | Golgi apparatus.<br>Cytoplasm $\hat{\epsilon}$ perinuclear region.                                                                                                  |
| Q60875 | ARHG2_MOUSE Rho guanine nucleotide exchange factor 2<br>OS=Mus musculus                            | 1.8E-08 | 30.1  | 3.1  | 5 (5 0 0 0 0)   | Cytoplasm. Cell junction $\hat{\epsilon}$ tight junction. Golgi                                                                                                     |

|        |                                                                                                      |         |       |      |                   |                                                                       |
|--------|------------------------------------------------------------------------------------------------------|---------|-------|------|-------------------|-----------------------------------------------------------------------|
|        | GN=Arhgef2 PE=1 SV=3                                                                                 |         |       |      |                   | apparatus.<br>Cytoplasm &°<br>cytoskeleton &°<br>spindle.             |
| P59999 | ARPC4_MOUSE Actin-related protein 2/3 complex subunit 4 OS=Mus musculus GN=Arpc4 PE=1 SV=3           | 9.8E-06 | 20.1  | 11.9 | 4 (4 0 0 0 0)     | Cytoplasm &°<br>cytoskeleton. Cell projection.                        |
| P58242 | ASM3B_MOUSE Acid sphingomyelinase-like phosphodiesterase 3b OS=Mus musculus GN=Smpd3b PE=1 SV=1      | 5.4E-14 | 100.2 | 27.9 | 23 (23 0 0 0 0)   | Secreted.                                                             |
| Q61024 | ASNS_MOUSE Asparagine synthetase [glutamine-hydrolyzing] OS=Mus musculus GN=Asns PE=2 SV=3           | 2.5E-08 | 20.2  | 6.2  | 2 (2 0 0 0 0)     | ND                                                                    |
| Q8BSY0 | ASPH_MOUSE Aspartyl/asparaginyl beta-hydroxylase OS=Mus musculus GN=Asph PE=2 SV=1                   | 4.0E-14 | 60.2  | 10.5 | 8 (8 0 0 0 0)     | Endoplasmic reticulum membrane; Single-pass type II membrane protein. |
| P16460 | ASSY_MOUSE Argininosuccinate synthase OS=Mus musculus GN=Ass1 PE=1 SV=1                              | 2.4E-07 | 20.2  | 7.3  | 2 (2 0 0 0 0)     | ND                                                                    |
| Q9Z1W8 | AT12A_MOUSE Potassium-transporting ATPase alpha chain 2 OS=Mus musculus GN=Atp12a PE=1 SV=2          | 8.8E-11 | 20.2  | 1.3  | 12 (12 0 0 0 0)   | Membrane; Multi-pass membrane protein.                                |
| Q9EPE9 | AT131_MOUSE Probable cation-transporting ATPase 13A1 OS=Mus musculus GN=Atp13a1 PE=1 SV=1            | 2.4E-07 | 60.2  | 5.9  | 6 (6 0 0 0 0)     | Membrane; Multi-pass membrane protein.                                |
| Q8VDN2 | AT1A1_MOUSE Sodium/potassium-transporting ATPase subunit alpha-1 OS=Mus musculus GN=Atp1a1 PE=1 SV=1 | 1.3E-14 | 300.3 | 29.6 | 190 (190 0 0 0 0) | Cell membrane; Multi-pass membrane protein.                           |
| Q9WV27 | AT1A4_MOUSE Sodium/potassium-transporting ATPase subunit alpha-4 OS=Mus musculus GN=Atp1a4 PE=1 SV=2 | 4.3E-07 | 16.2  | 1.6  | 2 (0 2 0 0 0)     | Cell membrane; Multi-pass membrane protein.                           |
| P97370 | AT1B3_MOUSE Sodium/potassium-transporting ATPase subunit beta-3 OS=Mus musculus GN=Atp1b3 PE=1 SV=1  | 1.0E-10 | 50.2  | 16.9 | 15 (15 0 0 0 0)   | Membrane; Single-pass type II membrane protein. Melanosome.           |
| Q8R429 | AT2A1_MOUSE Sarcoplasmic/endoplasmic reticulum calcium ATPase 1 OS=Mus musculus GN=Atp2a1 PE=2 SV=1  | 4.3E-14 | 110.3 | 8.9  | 27 (27 0 0 0 0)   | Endoplasmic reticulum membrane; Multi-pass membrane protein.          |

|        |                                                                                                     |         |       |      |                 |                                                                                                                            |
|--------|-----------------------------------------------------------------------------------------------------|---------|-------|------|-----------------|----------------------------------------------------------------------------------------------------------------------------|
|        |                                                                                                     |         |       |      |                 | Sarcoplasmic reticulum membrane; Multi-pass membrane protein.                                                              |
| Q55143 | AT2A2_MOUSE Sarcoplasmic/endoplasmic reticulum calcium ATPase 2 OS=Mus musculus GN=Atp2a2 PE=1 SV=2 | 1.2E-14 | 190.3 | 16.5 | 32 (32 0 0 0 0) | Endoplasmic reticulum membrane; Multi-pass membrane protein. Sarcoplasmic reticulum membrane; Multi-pass membrane protein. |
| Q9R0K7 | AT2B2_MOUSE Plasma membrane calcium-transporting ATPase 2 OS=Mus musculus GN=Atp2b2 PE=1 SV=2       | 1.1E-10 | 130.3 | 5.8  | 35 (35 0 0 0 0) | Cell membrane; Multi-pass membrane protein.                                                                                |
| Q9CQQ7 | AT5F1_MOUSE ATP synthase subunit b, mitochondrial OS=Mus musculus GN=Atp5f1 PE=1 SV=1               | 2.6E-08 | 98.2  | 40.2 | 10 (9 1 0 0 0)  | Mitochondrion. Mitochondrion inner membrane.                                                                               |
| Q9D5T0 | ATAD1_MOUSE ATPase family AAA domain-containing protein 1 OS=Mus musculus GN=Atad1 PE=1 SV=1        | 3.3E-05 | 18.2  | 5.8  | 2 (1 1 0 0 0)   | Peroxisome.                                                                                                                |
| Q925I1 | ATAD3_MOUSE ATPase family AAA domain-containing protein 3 OS=Mus musculus GN=Atad3 PE=1 SV=1        | 1.9E-06 | 80.2  | 14.9 | 9 (9 0 0 0 0)   | ND                                                                                                                         |
| Q6PA06 | ATLA2_MOUSE Atlastin-2 OS=Mus musculus GN=Atl2 PE=1 SV=1                                            | 1.8E-09 | 40.3  | 8.6  | 4 (4 0 0 0 0)   | Endoplasmic reticulum membrane; Multi-pass membrane protein.                                                               |
| Q91YH5 | ATLA3_MOUSE Atlastin-3 OS=Mus musculus GN=Atl3 PE=2 SV=1                                            | 9.0E-13 | 100.3 | 20.1 | 10 (10 0 0 0 0) | Endoplasmic reticulum membrane; Multi-pass membrane protein.                                                               |
| Q9DCX2 | ATP5H_MOUSE ATP synthase subunit d, mitochondrial OS=Mus musculus GN=Atp5h PE=1 SV=3                | 1.1E-11 | 70.2  | 43.5 | 15 (15 0 0 0 0) | Mitochondrion. Mitochondrion inner membrane.                                                                               |
| Q64430 | ATP7A_MOUSE Copper-transporting ATPase 1 OS=Mus musculus GN=Atp7a PE=1 SV=2                         | 2.7E-06 | 20.1  | 1.3  | 3 (3 0 0 0 0)   | Golgi apparatus & trans-Golgi network membrane; Multi-pass membrane                                                        |

|        |                                                                                          |         |       |      |                 |                                                                                                                                                 |
|--------|------------------------------------------------------------------------------------------|---------|-------|------|-----------------|-------------------------------------------------------------------------------------------------------------------------------------------------|
|        |                                                                                          |         |       |      |                 | protein. Cell membrane; Multi-pass membrane protein.                                                                                            |
| Q03265 | ATPA_MOUSE ATP synthase subunit alpha, mitochondrial OS=Mus musculus GN=Atp5a1 PE=1 SV=1 | 3.3E-15 | 220.3 | 48.1 | 42 (42 0 0 0 0) | Mitochondrion inner membrane. Cell membrane; Peripheral membrane protein; Extracellular side.                                                   |
| P56480 | ATPB_MOUSE ATP synthase subunit beta, mitochondrial OS=Mus musculus GN=Atp5b PE=1 SV=2   | 1.0E-30 | 268.3 | 59.7 | 36 (35 1 0 0 0) | Mitochondrion. Mitochondrion inner membrane.                                                                                                    |
| Q9D3D9 | ATPD_MOUSE ATP synthase subunit delta, mitochondrial OS=Mus musculus GN=Atp5d PE=1 SV=1  | 8.7E-11 | 40.2  | 20.2 | 6 (6 0 0 0 0)   | Mitochondrion. Mitochondrion inner membrane.                                                                                                    |
| Q91VR2 | ATPG_MOUSE ATP synthase subunit gamma, mitochondrial OS=Mus musculus GN=Atp5c1 PE=1 SV=1 | 2.6E-12 | 70.2  | 24.2 | 9 (9 0 0 0 0)   | Mitochondrion. Mitochondrion inner membrane; Peripheral membrane protein.                                                                       |
| Q9DB20 | ATPO_MOUSE ATP synthase subunit O, mitochondrial OS=Mus musculus GN=Atp5o PE=1 SV=1      | 4.8E-10 | 60.2  | 30.5 | 11 (11 0 0 0 0) | Mitochondrion. Mitochondrion inner membrane.                                                                                                    |
| P70295 | AUP1_MOUSE Ancient ubiquitous protein 1 OS=Mus musculus GN=Aup1 PE=2 SV=1                | 5.9E-11 | 30.3  | 11.7 | 3 (3 0 0 0 0)   | Endoplasmic reticulum membrane; Single-pass type III membrane protein; Cytoplasmic side.                                                        |
| P01887 | B2MG_MOUSE Beta-2-microglobulin OS=Mus musculus GN=B2m PE=1 SV=1                         | 5.8E-07 | 20.2  | 16.0 | 10 (10 0 0 0 0) | Secreted.                                                                                                                                       |
| O08734 | BAK_MOUSE Bcl-2 homologous antagonist/killer OS=Mus musculus GN=Bak1 PE=1 SV=1           | 2.4E-09 | 20.2  | 10.1 | 3 (3 0 0 0 0)   | Mitochondrion membrane; Single-pass membrane protein.                                                                                           |
| Q61335 | BAP31_MOUSE B-cell receptor-associated protein 31 OS=Mus musculus GN=Bcap31 PE=1 SV=3    | 1.0E-30 | 188.4 | 36.3 | 30 (29 1 0 0 0) | Endoplasmic reticulum membrane; Multi-pass membrane protein. Endoplasmic reticulum-Golgi intermediate compartment membrane; Multi-pass membrane |

|        |                                                                                                        |         |       |      |                    |                                                                                                                                                                                                                                                                                                                                                                                                                                                                                                                                                                                                                                                        |
|--------|--------------------------------------------------------------------------------------------------------|---------|-------|------|--------------------|--------------------------------------------------------------------------------------------------------------------------------------------------------------------------------------------------------------------------------------------------------------------------------------------------------------------------------------------------------------------------------------------------------------------------------------------------------------------------------------------------------------------------------------------------------------------------------------------------------------------------------------------------------|
|        |                                                                                                        |         |       |      |                    | protein.                                                                                                                                                                                                                                                                                                                                                                                                                                                                                                                                                                                                                                               |
| P18572 | BASI_MOUSE Basigin<br>OS=Mus musculus GN=Bsg<br>PE=1 SV=2                                              | 2.2E-14 | 80.2  | 21.6 | 32 (32 0 0 0<br>0) | Cell membrane;<br>Single-pass type I<br>membrane protein.<br>Melanosome.                                                                                                                                                                                                                                                                                                                                                                                                                                                                                                                                                                               |
| Q91XV3 | BASP1_MOUSE Brain acid<br>soluble protein 1 OS=Mus<br>musculus GN=Basp1 PE=1<br>SV=3                   | 7.8E-15 | 100.3 | 69.0 | 22 (22 0 0 0<br>0) | Cell membrane;<br>Lipid-anchor. Cell<br>projection °<br>growth cone.                                                                                                                                                                                                                                                                                                                                                                                                                                                                                                                                                                                   |
| Q9Z1R2 | BAT3_MOUSE Large<br>proline-rich protein BAT3<br>OS=Mus musculus GN=Bat3<br>PE=1 SV=1                  | 1.8E-07 | 30.2  | 3.2  | 3 (3 0 0 0 0)      | Cytoplasm °<br>cytosol. Nucleus.                                                                                                                                                                                                                                                                                                                                                                                                                                                                                                                                                                                                                       |
| Q91ZU6 | BPA1_MOUSE Bullous<br>pemphigoid antigen 1,<br>isoforms 1/2/3/4 OS=Mus<br>musculus GN=Dst PE=1<br>SV=1 | 3.1E-09 | 40.2  | 0.5  | 4 (4 0 0 0 0)      | Cytoplasm °<br>cytoskeleton. Cell<br>projection °<br>axon. Membrane.<br>Cytoplasm °<br>cytoskeleton. Cell<br>membrane °<br>sarcolemma.<br>Cytoplasm °<br>myofibril °<br>sarcomere ° Z<br>line. Cytoplasm °<br>myofibril °<br>sarcomere ° H<br>zone. Cytoplasm<br>° cytoskeleton.<br>Cytoplasm °<br>cytoskeleton. Cell<br>junction °<br>hemidesmosome.<br>Nucleus. Nucleus<br>envelope.<br>Membrane; Single-<br>pass membrane<br>protein.<br>Endoplasmic<br>reticulum<br>membrane; Single-<br>pass membrane<br>protein. Cytoplasm<br>° cytoskeleton.<br>Cytoplasm °<br>cytoskeleton.<br>Cytoplasm ° cell<br>cortex. Cell<br>membrane; Lipid-<br>anchor. |



|        |                                                                                                                     |         |       |      |                 |                                                                                                                                       |
|--------|---------------------------------------------------------------------------------------------------------------------|---------|-------|------|-----------------|---------------------------------------------------------------------------------------------------------------------------------------|
| Q8BXV2 | BRI3B_MOUSE BRI3-binding protein OS=Mus musculus GN=Bri3bp PE=2 SV=1                                                | 3.6E-11 | 30.3  | 11.5 | 5 (5 0 0 0 0)   | Mitochondrion outer membrane; Multi-pass membrane protein.                                                                            |
| Q8R2Q8 | BST2_MOUSE Bone marrow stromal antigen 2 OS=Mus musculus GN=Bst2 PE=1 SV=1                                          | 1.9E-13 | 50.3  | 17.4 | 29 (29 0 0 0 0) | Cell membrane; Lipid-anchor ° GPI-anchor. Cell membrane; Single-pass type II membrane protein. Golgi apparatus ° trans-Golgi network. |
| O35658 | C1QBP_MOUSE Complement component 1 Q subcomponent-binding protein, mitochondrial OS=Mus musculus GN=C1qbp PE=1 SV=1 | 2.1E-12 | 30.2  | 10.1 | 3 (3 0 0 0 0)   | Mitochondrion matrix.                                                                                                                 |
| Q3V3R1 | C1TM_MOUSE Monofunctional C1-tetrahydrofolate synthase, mitochondrial OS=Mus musculus GN=Mthfd11 PE=1 SV=2          | 8.9E-10 | 100.2 | 10.4 | 11 (11 0 0 0 0) | Mitochondrion.                                                                                                                        |
| Q3V3R1 | C1TM_MOUSE Monofunctional C1-tetrahydrofolate synthase, mitochondrial OS=Mus musculus GN=Mthfd11 PE=1 SV=2          | 3.8E-08 | 30.1  | 3.8  | 3 (3 0 0 0 0)   | Mitochondrion.                                                                                                                        |
| O08532 | CA2D1_MOUSE Voltage-dependent calcium channel subunit alpha-2/delta-1 OS=Mus musculus GN=Cacna2d1 PE=1 SV=1         | 1.4E-13 | 80.3  | 9.9  | 10 (10 0 0 0 0) | Membrane; Single-pass type I membrane protein.                                                                                        |
| Q8CGU1 | CACO1_MOUSE Calcium-binding and coiled-coil domain-containing protein 1 OS=Mus musculus GN=Calcoco1 PE=1 SV=2       | 1.5E-06 | 30.2  | 5.2  | 3 (3 0 0 0 0)   | Cytoplasm. Nucleus.                                                                                                                   |
| Q8CGU1 | CACO1_MOUSE Calcium-binding and coiled-coil domain-containing protein 1 OS=Mus musculus GN=Calcoco1 PE=1 SV=2       | 6.7E-07 | 50.2  | 8.5  | 7 (7 0 0 0 0)   | Cytoplasm. Nucleus.                                                                                                                   |
| P55288 | CAD11_MOUSE Cadherin-11 OS=Mus musculus GN=Cdh11 PE=1 SV=1                                                          | 2.2E-07 | 70.2  | 10.3 | 8 (8 0 0 0 0)   | Cell membrane; Single-pass type I membrane protein.                                                                                   |
| Q9WTR5 | CAD13_MOUSE Cadherin-13 OS=Mus musculus GN=Cdh13 PE=2 SV=1                                                          | 1.5E-09 | 30.2  | 5.2  | 3 (3 0 0 0 0)   | Cell membrane; Lipid-anchor ° GPI-anchor.                                                                                             |
| P33146 | CAD15_MOUSE Cadherin-15 OS=Mus musculus GN=Cdh15 PE=1 SV=2                                                          | 1.4E-12 | 170.3 | 29.5 | 61 (61 0 0 0 0) | Cell membrane; Single-pass type I membrane protein.                                                                                   |

*A novel role of mitochondria in muscle injury*

|        |                                                                                              |         |       |      |                 |                                                                                  |
|--------|----------------------------------------------------------------------------------------------|---------|-------|------|-----------------|----------------------------------------------------------------------------------|
| P15116 | CADH2_MOUSE Cadherin-2 OS=Mus musculus GN=Cdh2 PE=1 SV=1                                     | 4.7E-14 | 90.3  | 15.6 | 27 (27 0 0 0 0) | Cell membrane; Single-pass type I membrane protein.                              |
| Q9D6P8 | CALL3_MOUSE Calmodulin-like protein 3 OS=Mus musculus GN=Calml3 PE=2 SV=1                    | 8.6E-06 | 20.2  | 8.1  | 3 (3 0 0 0 0)   | ND                                                                               |
| P62204 | CALM_MOUSE Calmodulin OS=Mus musculus GN=Calm1 PE=1 SV=2                                     | 1.6E-12 | 20.3  | 25.5 | 4 (4 0 0 0 0)   | Cytoplasm ° cytoskeleton ° spindle. Cytoplasm ° cytoskeleton ° spindle pole.     |
| P14211 | CALR_MOUSE Calreticulin OS=Mus musculus GN=Calr PE=1 SV=1                                    | 8.7E-12 | 130.3 | 32.5 | 29 (29 0 0 0 0) | Endoplasmic reticulum lumen. Cytoplasmic granule.                                |
| O35887 | CALU_MOUSE Calumenin OS=Mus musculus GN=Calu PE=1 SV=1                                       | 3.4E-10 | 70.2  | 22.5 | 12 (12 0 0 0 0) | Endoplasmic reticulum lumen. Melanosome. Sarcoplasmic reticulum lumen. Secreted. |
| P35564 | CALX_MOUSE Calnexin OS=Mus musculus GN=Canx PE=1 SV=1                                        | 1.3E-14 | 210.2 | 29.3 | 85 (85 0 0 0 0) | Endoplasmic reticulum membrane; Single-pass type I membrane protein. Melanosome. |
| O08529 | CAN2_MOUSE Calpain-2 catalytic subunit OS=Mus musculus GN=Capn2 PE=2 SV=4                    | 7.6E-08 | 30.2  | 5.6  | 4 (4 0 0 0 0)   | Cytoplasm. Cell membrane.                                                        |
| Q6ZQ38 | CAND1_MOUSE Cullin-associated NEDD8-dissociated protein 1 OS=Mus musculus GN=Cand1 PE=2 SV=2 | 2.7E-07 | 80.2  | 8.2  | 8 (8 0 0 0 0)   | Nucleus.                                                                         |
| P40124 | CAP1_MOUSE Adenylyl cyclase-associated protein 1 OS=Mus musculus GN=Cap1 PE=1 SV=3           | 3.0E-06 | 30.2  | 8.4  | 3 (3 0 0 0 0)   | Cell membrane; Peripheral membrane protein.                                      |
| Q60865 | CAPR1_MOUSE Caprin-1 OS=Mus musculus GN=Caprin1 PE=1 SV=2                                    | 1.2E-06 | 40.2  | 6.1  | 4 (4 0 0 0 0)   | Cytoplasm ° cytosol. Cell projection ° dendrite.                                 |
| P70403 | CASP_MOUSE Protein CASP OS=Mus musculus GN=Cux1 PE=2 SV=2                                    | 1.3E-11 | 50.2  | 10.0 | 6 (6 0 0 0 0)   | Golgi apparatus membrane; Single-pass type IV membrane protein.                  |
| P49817 | CAV1_MOUSE Caveolin-1 OS=Mus musculus GN=Cav1 PE=1 SV=1                                      | 3.8E-10 | 40.2  | 27.0 | 11 (11 0 0 0 0) | Golgi apparatus membrane; Peripheral membrane protein. Cell membrane; Peripheral |

|        |                                                                                                                 |         |       |      |                 |                                                                                                                                                  |
|--------|-----------------------------------------------------------------------------------------------------------------|---------|-------|------|-----------------|--------------------------------------------------------------------------------------------------------------------------------------------------|
|        |                                                                                                                 |         |       |      |                 | membrane protein. Membrane caveola; Peripheral membrane protein. Membrane raft.                                                                  |
| O89001 | CBPD_MOUSE<br>Carboxypeptidase D<br>OS=Mus musculus GN=Cpd<br>PE=1 SV=1                                         | 4.4E-13 | 90.3  | 7.6  | 10 (10 0 0 0 0) | Membrane; Single-pass type I membrane protein.                                                                                                   |
| Q3U4G3 | CC021_MOUSE<br>Uncharacterized protein<br>C3orf21 homolog OS=Mus musculus PE=2 SV=1                             | 6.5E-05 | 20.1  | 2.6  | 3 (3 0 0 0 0)   | Membrane; Single-pass membrane protein.                                                                                                          |
| Q3USZ8 | CC058_MOUSE UPF0672<br>protein C3orf58 homolog<br>OS=Mus musculus PE=2<br>SV=1                                  | 3.1E-08 | 20.2  | 6.1  | 2 (2 0 0 0 0)   | Secreted.                                                                                                                                        |
| Q9D024 | CC47_MOUSE Coiled-coil<br>domain-containing protein 47<br>OS=Mus musculus<br>GN=Ccdc47 PE=2 SV=2                | 4.7E-08 | 140.2 | 35.6 | 15 (15 0 0 0 0) | Membrane; Single-pass membrane protein.                                                                                                          |
| Q8BGU5 | CCNY_MOUSE Cyclin-Y<br>OS=Mus musculus<br>GN=Ccny PE=1 SV=1                                                     | 6.0E-05 | 20.2  | 9.4  | 2 (2 0 0 0 0)   | Cell membrane; Lipid-anchor; Cytoplasmic side.                                                                                                   |
| O35566 | CD151_MOUSE CD151<br>antigen OS=Mus musculus<br>GN=Cd151 PE=2 SV=2                                              | 3.0E-09 | 20.2  | 9.1  | 6 (6 0 0 0 0)   | Membrane; Multi-pass membrane protein.                                                                                                           |
| Q61490 | CD166_MOUSE CD166<br>antigen OS=Mus musculus<br>GN=Alcam PE=1 SV=3                                              | 2.3E-11 | 60.3  | 11.7 | 8 (8 0 0 0 0)   | Membrane; Single-pass type I membrane protein.                                                                                                   |
| P51480 | CD2A1_MOUSE Cyclin-<br>dependent kinase inhibitor<br>2A, isoforms 1/2 OS=Mus<br>musculus GN=Cdkn2a PE=1<br>SV=2 | 1.6E-07 | 20.2  | 15.5 | 3 (3 0 0 0 0)   | Cytoplasm. Nucleus.                                                                                                                              |
| P15379 | CD44_MOUSE CD44<br>antigen OS=Mus musculus<br>GN=Cd44 PE=1 SV=3                                                 | 1.1E-09 | 60.2  | 5.3  | 26 (26 0 0 0 0) | Membrane; Single-pass type I membrane protein.                                                                                                   |
| Q61735 | CD47_MOUSE Leukocyte<br>surface antigen CD47<br>OS=Mus musculus<br>GN=Cd47 PE=1 SV=2                            | 1.6E-11 | 20.2  | 8.9  | 6 (6 0 0 0 0)   | Cell membrane; Multi-pass membrane protein.                                                                                                      |
| P41731 | CD63_MOUSE CD63<br>antigen OS=Mus musculus<br>GN=Cd63 PE=1 SV=2                                                 | 8.4E-09 | 20.2  | 8.8  | 10 (10 0 0 0 0) | Cell membrane; Multi-pass membrane protein. Lysosome membrane; Multi-pass membrane protein. Late endosome membrane; Multi-pass membrane protein. |

|        |                                                                                                                                |         |       |      |                 |                                                                                                                                                                 |
|--------|--------------------------------------------------------------------------------------------------------------------------------|---------|-------|------|-----------------|-----------------------------------------------------------------------------------------------------------------------------------------------------------------|
| P35762 | CD81_MOUSE CD81 antigen OS=Mus musculus GN=Cd81 PE=1 SV=1                                                                      | 2.6E-13 | 40.3  | 9.7  | 11 (11 0 0 0 0) | Membrane; Multi-pass membrane protein.                                                                                                                          |
| P40237 | CD82_MOUSE CD82 antigen OS=Mus musculus GN=Cd82 PE=1 SV=1                                                                      | 9.8E-08 | 30.2  | 12.8 | 7 (7 0 0 0 0)   | Membrane; Multi-pass membrane protein.                                                                                                                          |
| P40240 | CD9_MOUSE CD9 antigen OS=Mus musculus GN=Cd9 PE=1 SV=2                                                                         | 1.2E-07 | 20.2  | 10.2 | 7 (7 0 0 0 0)   | Membrane; Multi-pass membrane protein.                                                                                                                          |
| Q9Z0M6 | CD97_MOUSE CD97 antigen OS=Mus musculus GN=Cd97 PE=1 SV=2                                                                      | 4.4E-12 | 70.3  | 13.7 | 18 (18 0 0 0 0) | Cell membrane; Multi-pass membrane protein.                                                                                                                     |
| P11440 | CDC2_MOUSE Cell division control protein 2 homolog OS=Mus musculus GN=Cdc2 PE=1 SV=3                                           | 1.2E-10 | 90.2  | 33.3 | 9 (9 0 0 0 0)   | Nucleus.                                                                                                                                                        |
| P60766 | CDC42_MOUSE Cell division control protein 42 homolog OS=Mus musculus GN=Cdc42 PE=1 SV=1                                        | 2.3E-09 | 20.2  | 11.0 | 8 (8 0 0 0 0)   | Cell membrane; Lipid-anchor; Cytoplasmic side. Cytoplasmic centrosome.                                                                                          |
| Q8VDP6 | CDIPT_MOUSE CDP-diacylglycerol--inositol 3-phosphatidyltransferase OS=Mus musculus GN=Cdipt PE=1 SV=1                          | 1.1E-10 | 50.2  | 16.0 | 8 (8 0 0 0 0)   | Endoplasmic reticulum membrane; Multi-pass membrane protein. Golgi apparatus membrane; Multi-pass membrane protein. Cell membrane; Multi-pass membrane protein. |
| P63038 | CH60_MOUSE 60 kDa heat shock protein, mitochondrial OS=Mus musculus GN=Hspd1 PE=1 SV=1                                         | 1.0E-30 | 300.3 | 52.4 | 67 (67 0 0 0 0) | Mitochondrion matrix.                                                                                                                                           |
| Q9CRB9 | CHCH3_MOUSE Coiled-coil-helix-coiled-coil-helix domain-containing protein 3, mitochondrial OS=Mus musculus GN=Chchd3 PE=1 SV=1 | 1.1E-07 | 60.2  | 16.3 | 7 (7 0 0 0 0)   | Mitochondrion inner membrane; Lipid-anchor; Intermembrane side.                                                                                                 |
| Q9D8B3 | CHM4B_MOUSE Charged multivesicular body protein 4b OS=Mus musculus GN=Chmp4b PE=2 SV=2                                         | 2.1E-06 | 30.2  | 15.6 | 5 (5 0 0 0 0)   | Cytoplasmic cytosol. Late endosome membrane; Peripheral membrane protein.                                                                                       |
| P0C0A3 | CHMP6_MOUSE Charged multivesicular body protein 6 OS=Mus musculus GN=Chmp6 PE=2 SV=2                                           | 1.7E-09 | 20.2  | 10.5 | 2 (2 0 0 0 0)   | Endomembrane system. Endosome membrane; Lipid-anchor. Late endosome                                                                                             |

*A novel role of mitochondria in muscle injury*

|        |                                                                                         |         |       |      |                 |                                                                                                                                                                |
|--------|-----------------------------------------------------------------------------------------|---------|-------|------|-----------------|----------------------------------------------------------------------------------------------------------------------------------------------------------------|
|        |                                                                                         |         |       |      |                 | membrane.                                                                                                                                                      |
| P61022 | CHP1_MOUSE Calcium-binding protein p22 OS=Mus musculus GN=Chp PE=2 SV=2                 | 3.2E-13 | 70.3  | 44.6 | 9 (9 0 0 0 0)   | Cytoplasm.                                                                                                                                                     |
| Q9CZU6 | CISY_MOUSE Citrate synthase, mitochondrial OS=Mus musculus GN=Cs PE=1 SV=1              | 7.5E-10 | 80.2  | 17.2 | 8 (8 0 0 0 0)   | Mitochondrion matrix.                                                                                                                                          |
| Q8BMK4 | CKAP4_MOUSE Cytoskeleton-associated protein 4 OS=Mus musculus GN=Ckap4 PE=2 SV=2        | 1.0E-30 | 338.3 | 53.6 | 88 (87 1 0 0 0) | Endoplasmic reticulum-Golgi intermediate compartment membrane; Single-pass membrane protein.                                                                   |
| A2AGT5 | CKAP5_MOUSE Cytoskeleton-associated protein 5 OS=Mus musculus GN=Ckap5 PE=2 SV=1        | 1.6E-06 | 20.2  | 1.3  | 2 (2 0 0 0 0)   | ND                                                                                                                                                             |
| Q9WVD4 | CLCN5_MOUSE H(+)/Cl(-) exchange transporter 5 OS=Mus musculus GN=Cln5 PE=2 SV=1         | 3.3E-14 | 20.2  | 3.8  | 3 (3 0 0 0 0)   | Golgi apparatus membrane; Multi-pass membrane protein. Endosome membrane; Multi-pass membrane protein. Cell membrane; Multi-pass membrane protein.             |
| Q9CQX5 | CLDN1_MOUSE Claudin domain-containing protein 1 OS=Mus musculus GN=Cldnd1 PE=1 SV=1     | 2.0E-11 | 20.3  | 8.7  | 3 (3 0 0 0 0)   | Membrane; Multi-pass membrane protein.                                                                                                                         |
| Q68FD5 | CLH_MOUSE Clathrin heavy chain 1 OS=Mus musculus GN=Cltc PE=1 SV=3                      | 5.4E-14 | 420.3 | 31.5 | 75 (75 0 0 0 0) | Cytoplasmic vesicle membrane; Peripheral membrane protein; Cytoplasmic side. Membrane ° coated pit; Peripheral membrane protein; Cytoplasmic side. Melanosome. |
| Q9Z1Q5 | CLIC1_MOUSE Chloride intracellular channel protein 1 OS=Mus musculus GN=Clic1 PE=1 SV=3 | 7.3E-10 | 20.2  | 12.4 | 2 (2 0 0 0 0)   | Nucleus. Nucleus membrane; Single-pass membrane protein. Cytoplasm. Cell membrane; Single-pass membrane protein.                                               |

|        |                                                                                                        |         |       |      |                 |                                                                                                                                                                                                                                                                                           |
|--------|--------------------------------------------------------------------------------------------------------|---------|-------|------|-----------------|-------------------------------------------------------------------------------------------------------------------------------------------------------------------------------------------------------------------------------------------------------------------------------------------|
| Q8VBZ3 | CLPT1_MOUSE Cleft lip and palate transmembrane protein 1 homolog OS=Mus musculus GN=Clptm1 PE=1 SV=1   | 1.8E-12 | 60.2  | 11.4 | 13 (13 0 0 0 0) | Membrane; Multi-pass membrane protein.                                                                                                                                                                                                                                                    |
| Q8BH59 | CMC1_MOUSE Calcium-binding mitochondrial carrier protein Aralar1 OS=Mus musculus GN=Slc25a12 PE=1 SV=1 | 4.7E-14 | 40.2  | 9.6  | 4 (4 0 0 0 0)   | Mitochondrion inner membrane; Multi-pass membrane protein.                                                                                                                                                                                                                                |
| Q08093 | CNN2_MOUSE Calponin-2 OS=Mus musculus GN=Cnn2 PE=2 SV=1                                                | 1.1E-06 | 20.1  | 6.9  | 3 (3 0 0 0 0)   | ND                                                                                                                                                                                                                                                                                        |
| Q9QXT0 | CNPY2_MOUSE Protein canopy homolog 2 OS=Mus musculus GN=Cnpy2 PE=2 SV=1                                | 3.6E-12 | 20.2  | 15.4 | 3 (3 0 0 0 0)   | Endoplasmic reticulum.                                                                                                                                                                                                                                                                    |
| Q9EP72 | CO024_MOUSE UPF0480 protein C15orf24 homolog OS=Mus musculus GN=ORF3 PE=2 SV=1                         | 3.4E-10 | 30.1  | 16.2 | 5 (5 0 0 0 0)   | Membrane; Single-pass type I membrane protein.                                                                                                                                                                                                                                            |
| Q01149 | CO1A2_MOUSE Collagen alpha-2(I) chain OS=Mus musculus GN=Col1a2 PE=2 SV=2                              | 2.2E-16 | 160.3 | 20.9 | 16 (16 0 0 0 0) | Secreted $\hat{\epsilon}^{\circ}$ extracellular space $\hat{\epsilon}^{\circ}$ extracellular matrix.                                                                                                                                                                                      |
| P08121 | CO3A1_MOUSE Collagen alpha-1(III) chain OS=Mus musculus GN=Col3a1 PE=2 SV=4                            | 2.2E-15 | 110.3 | 11.7 | 14 (14 0 0 0 0) | Secreted $\hat{\epsilon}^{\circ}$ extracellular space $\hat{\epsilon}^{\circ}$ extracellular matrix.                                                                                                                                                                                      |
| O88207 | CO5A1_MOUSE Collagen alpha-1(V) chain OS=Mus musculus GN=Col5a1 PE=2 SV=2                              | 9.3E-06 | 20.2  | 1.6  | 4 (4 0 0 0 0)   | Secreted $\hat{\epsilon}^{\circ}$ extracellular space $\hat{\epsilon}^{\circ}$ extracellular matrix.                                                                                                                                                                                      |
| Q3U962 | CO5A2_MOUSE Collagen alpha-2(V) chain OS=Mus musculus GN=Col5a2 PE=1 SV=1                              | 2.1E-09 | 20.1  | 2.2  | 2 (2 0 0 0 0)   | Secreted $\hat{\epsilon}^{\circ}$ extracellular space $\hat{\epsilon}^{\circ}$ extracellular matrix.                                                                                                                                                                                      |
| Q60847 | COCA1_MOUSE Collagen alpha-1(XII) chain OS=Mus musculus GN=Col12a1 PE=2 SV=3                           | 1.3E-10 | 180.2 | 6.3  | 18 (18 0 0 0 0) | Secreted $\hat{\epsilon}^{\circ}$ extracellular space $\hat{\epsilon}^{\circ}$ extracellular matrix.                                                                                                                                                                                      |
| P18760 | COF1_MOUSE Cofilin-1 OS=Mus musculus GN=Cfl1 PE=1 SV=3                                                 | 5.2E-12 | 40.3  | 42.2 | 6 (6 0 0 0 0)   | Nucleus matrix. Cytoplasm $\hat{\epsilon}^{\circ}$ cytoskeleton. Cell projection $\hat{\epsilon}^{\circ}$ ruffle membrane; Peripheral membrane protein; Cytoplasmic side. Cell projection $\hat{\epsilon}^{\circ}$ lamellipodium membrane; Peripheral membrane protein; Cytoplasmic side. |

*A novel role of mitochondria in muscle injury*

|        |                                                                       |         |      |     |               |                                                                                                                                                                                                                                                                     |
|--------|-----------------------------------------------------------------------|---------|------|-----|---------------|---------------------------------------------------------------------------------------------------------------------------------------------------------------------------------------------------------------------------------------------------------------------|
| Q8K4Q8 | COL12_MOUSE Collectin-12 OS=Mus musculus GN=Colec12 PE=1 SV=1         | 3.4E-08 | 30.2 | 5.1 | 3 (3 0 0 0 0) | Membrane; Single-pass type II membrane protein.                                                                                                                                                                                                                     |
| Q8CIE6 | COPA_MOUSE Coatomer subunit alpha OS=Mus musculus GN=Copa PE=1 SV=1   | 3.3E-10 | 80.2 | 7.3 | 9 (9 0 0 0 0) | Cytoplasm. Golgi apparatus membrane; Peripheral membrane protein; Cytoplasmic side. Cytoplasmic vesicle $\hat{=}$ COPI-coated vesicle membrane; Peripheral membrane protein; Cytoplasmic side. Secreted.                                                            |
| Q9JIF7 | COPB_MOUSE Coatomer subunit beta OS=Mus musculus GN=Copb1 PE=1 SV=1   | 4.1E-10 | 60.2 | 7.6 | 6 (6 0 0 0 0) | Cytoplasm. Golgi apparatus membrane; Peripheral membrane protein; Cytoplasmic side. Cytoplasmic vesicle $\hat{=}$ COPI-coated vesicle membrane; Peripheral membrane protein; Cytoplasmic side. Cell membrane. Endoplasmic reticulum-Golgi intermediate compartment. |
| O55029 | COPB2_MOUSE Coatomer subunit beta' OS=Mus musculus GN=Copb2 PE=2 SV=2 | 4.4E-11 | 30.2 | 4.2 | 3 (3 0 0 0 0) | Cytoplasm. Golgi apparatus membrane; Peripheral membrane protein; Cytoplasmic side. Cytoplasmic vesicle $\hat{=}$ COPI-coated vesicle membrane; Peripheral membrane protein; Cytoplasmic side.                                                                      |
| Q9QZE5 | COPG_MOUSE Coatomer subunit gamma OS=Mus musculus GN=Copg PE=2 SV=1   | 1.4E-07 | 30.2 | 5.9 | 4 (4 0 0 0 0) | Cytoplasm. Golgi apparatus membrane; Peripheral membrane protein; Cytoplasmic side. Cytoplasmic                                                                                                                                                                     |

|        |                                                                                                           |         |       |      |                 |  |                                                                                                     |
|--------|-----------------------------------------------------------------------------------------------------------|---------|-------|------|-----------------|--|-----------------------------------------------------------------------------------------------------|
|        |                                                                                                           |         |       |      |                 |  | vesicle $\hat{\infty}$ COPI-coated vesicle membrane; Peripheral membrane protein; Cytoplasmic side. |
| Q9WUM4 | COR1C_MOUSE Coronin-1C OS=Mus musculus GN=Coro1c PE=1 SV=2                                                | 2.0E-11 | 20.2  | 6.1  | 4 (4 0 0 0 0)   |  | ND                                                                                                  |
| P00405 | COX2_MOUSE Cytochrome c oxidase subunit 2 OS=Mus musculus GN=Mtco2 PE=1 SV=1                              | 3.6E-14 | 48.3  | 23.3 | 8 (7 1 0 0 0)   |  | Mitochondrion inner membrane; Multi-pass membrane protein.                                          |
| P19783 | COX41_MOUSE Cytochrome c oxidase subunit 4 isoform 1, mitochondrial OS=Mus musculus GN=Cox4i1 PE=1 SV=2   | 2.3E-13 | 40.2  | 26.6 | 7 (7 0 0 0 0)   |  | Mitochondrion inner membrane.                                                                       |
| P12787 | COX5A_MOUSE Cytochrome c oxidase subunit 5A, mitochondrial OS=Mus musculus GN=Cox5a PE=1 SV=2             | 9.8E-07 | 30.2  | 12.3 | 3 (3 0 0 0 0)   |  | Mitochondrion inner membrane.                                                                       |
| P19536 | COX5B_MOUSE Cytochrome c oxidase subunit 5B, mitochondrial OS=Mus musculus GN=Cox5b PE=1 SV=1             | 2.7E-05 | 20.2  | 8.6  | 3 (3 0 0 0 0)   |  | Mitochondrion inner membrane.                                                                       |
| Q8BKE6 | CP20A_MOUSE Cytochrome P450 20A1 OS=Mus musculus GN=Cyp20a1 PE=2 SV=1                                     | 3.2E-09 | 40.2  | 9.7  | 4 (4 0 0 0 0)   |  | Membrane; Single-pass membrane protein.                                                             |
| Q8K0C4 | CP51A_MOUSE Lanosterol 14-alpha demethylase OS=Mus musculus GN=Cyp51a1 PE=2 SV=1                          | 5.8E-12 | 100.2 | 25.0 | 11 (11 0 0 0 0) |  | Endoplasmic reticulum membrane. Microsome membrane.                                                 |
| Q8C166 | CPNE1_MOUSE Copine-1 OS=Mus musculus GN=Cpne1 PE=1 SV=1                                                   | 1.1E-09 | 80.2  | 17.9 | 17 (17 0 0 0 0) |  | ND                                                                                                  |
| P59108 | CPNE2_MOUSE Copine-2 OS=Mus musculus GN=Cpne2 PE=2 SV=1                                                   | 8.6E-12 | 40.2  | 9.9  | 5 (5 0 0 0 0)   |  | ND                                                                                                  |
| Q8BT60 | CPNE3_MOUSE Copine-3 OS=Mus musculus GN=Cpne3 PE=1 SV=2                                                   | 6.8E-12 | 40.2  | 8.1  | 4 (4 0 0 0 0)   |  | ND                                                                                                  |
| Q9CQF3 | CPSF5_MOUSE Cleavage and polyadenylation specificity factor subunit 5 OS=Mus musculus GN=Nudt21 PE=2 SV=1 | 1.2E-04 | 20.1  | 7.5  | 2 (2 0 0 0 0)   |  | Nucleus.                                                                                            |
| Q9D136 | CQ101_MOUSE PKHD domain-containing transmembrane protein                                                  | 1.7E-06 | 20.1  | 5.7  | 2 (2 0 0 0 0)   |  | Membrane; Single-pass type II membrane protein.                                                     |



*A novel role of mitochondria in muscle injury*

|        |                                                                                                                             |         |       |      |                 |                                                                                                                                             |  |
|--------|-----------------------------------------------------------------------------------------------------------------------------|---------|-------|------|-----------------|---------------------------------------------------------------------------------------------------------------------------------------------|--|
|        | C17orf101 homolog<br>OS=Mus musculus PE=2<br>SV=1                                                                           |         |       |      |                 |                                                                                                                                             |  |
| P23927 | CRYAB_MOUSE Alpha-crystallin B chain OS=Mus musculus GN=Cryab PE=1 SV=2                                                     | 1.4E-11 | 40.2  | 18.3 | 4 (4 0 0 0 0)   | Cytoplasm.<br>Nucleus.                                                                                                                      |  |
| O70589 | CSKP_MOUSE Peripheral plasma membrane protein CASK OS=Mus musculus GN=Cask PE=1 SV=2                                        | 4.1E-06 | 40.2  | 5.0  | 5 (5 0 0 0 0)   | Nucleus.<br>Cytoplasm. Cell membrane;<br>Peripheral membrane protein.                                                                       |  |
| P58466 | CTDS1_MOUSE Carboxy-terminal domain RNA polymerase II polypeptide A small phosphatase 1 OS=Mus musculus GN=Ctdsp1 PE=1 SV=1 | 7.3E-05 | 20.2  | 7.3  | 3 (3 0 0 0 0)   | Nucleus.                                                                                                                                    |  |
| Q6X893 | CTL1_MOUSE Choline transporter-like protein 1 OS=Mus musculus GN=Slc44a1 PE=1 SV=2                                          | 1.1E-10 | 30.2  | 6.3  | 3 (3 0 0 0 0)   | Cell membrane;<br>Multi-pass membrane protein.<br>Mitochondrion outer membrane;<br>Multi-pass membrane protein.                             |  |
| Q8BY89 | CTL2_MOUSE Choline transporter-like protein 2 OS=Mus musculus GN=Slc44a2 PE=1 SV=1                                          | 4.3E-10 | 60.2  | 7.8  | 15 (15 0 0 0 0) | Membrane; Multi-pass membrane protein.                                                                                                      |  |
| P26231 | CTNA1_MOUSE Catenin alpha-1 OS=Mus musculus GN=Ctnn1 PE=1 SV=1                                                              | 6.7E-15 | 290.3 | 36.0 | 67 (67 0 0 0 0) | Cytoplasm &° cytoskeleton. Cell junction &° adherens junction. Cell membrane; Peripheral membrane protein; Cytoplasmic side. Cell junction. |  |
| Q02248 | CTNB1_MOUSE Catenin beta-1 OS=Mus musculus GN=Ctnb1 PE=1 SV=1                                                               | 1.0E-30 | 190.3 | 24.6 | 43 (43 0 0 0 0) | Cytoplasm. Cytoplasm &° cytoskeleton. Nucleus. Cell junction &° adherens junction. Cell junction. Cell membrane.                            |  |
| P30999 | CTND1_MOUSE Catenin delta-1 OS=Mus musculus GN=Ctnnd1 PE=1 SV=2                                                             | 7.1E-14 | 260.3 | 25.9 | 56 (56 0 0 0 0) | Cytoplasm. Nucleus. Cell membrane.                                                                                                          |  |
| Q09143 | CTR1_MOUSE High affinity cationic amino acid transporter 1 OS=Mus musculus GN=Slc7a1 PE=2 SV=1                              | 4.1E-11 | 40.2  | 8.5  | 12 (12 0 0 0 0) | Membrane; Multi-pass membrane protein.                                                                                                      |  |
| Q8VE73 | CUL7_MOUSE Cullin-7                                                                                                         | 1.9E-09 | 30.2  | 2.2  | 3 (3 0 0 0 0)   | ND                                                                                                                                          |  |

*A novel role of mitochondria in muscle injury*

|        |                                                                                                               |         |      |      |                    |                                                                                                                                                                                                                                                                                         |
|--------|---------------------------------------------------------------------------------------------------------------|---------|------|------|--------------------|-----------------------------------------------------------------------------------------------------------------------------------------------------------------------------------------------------------------------------------------------------------------------------------------|
|        | OS=Mus musculus GN=Cul7<br>PE=1 SV=2                                                                          |         |      |      |                    |                                                                                                                                                                                                                                                                                         |
| Q99LF4 | CV028_MOUSE UPF0027<br>protein C22orf28 homolog<br>OS=Mus musculus<br>GN=D10Wsu52e PE=2<br>SV=1               | 8.4E-07 | 20.1 | 5.7  | 2 (2 0 0 0 0)      | Cytoplasm.                                                                                                                                                                                                                                                                              |
| O70378 | CX4NB_MOUSE Neighbor<br>of COX4 OS=Mus musculus<br>GN=Cox4nb PE=1 SV=1                                        | 5.0E-10 | 30.3 | 18.4 | 5 (5 0 0 0 0)      | ND                                                                                                                                                                                                                                                                                      |
| P97792 | CXAR_MOUSE<br>Coxsackievirus and<br>adenovirus receptor homolog<br>OS=Mus musculus<br>GN=Cxadr PE=1 SV=1      | 4.1E-06 | 20.1 | 6.6  | 2 (2 0 0 0 0)      | Cell membrane;<br>Single-pass type I<br>membrane protein.<br>Cell junction $\hat{\epsilon}^{\circ}$<br>adherens junction.<br>Cell junction $\hat{\epsilon}^{\circ}$<br>tight junction.<br>Basolateral cell<br>membrane; Single-<br>pass type I<br>membrane protein.<br>Secreted.        |
| Q9D0M3 | CY1_MOUSE Cytochrome<br>c1, heme protein,<br>mitochondrial OS=Mus<br>musculus GN=Cyc1 PE=1<br>SV=1            | 7.8E-15 | 30.3 | 16.0 | 7 (7 0 0 0 0)      | Mitochondrion<br>inner membrane;<br>Single-pass<br>membrane protein;<br>Intermembrane<br>side.                                                                                                                                                                                          |
| Q9CQX2 | CYB5B_MOUSE<br>Cytochrome b5 type B<br>OS=Mus musculus<br>GN=Cyb5b PE=1 SV=1                                  | 1.0E-30 | 70.3 | 51.4 | 14 (14 0 0 0<br>0) | Mitochondrion<br>outer membrane.                                                                                                                                                                                                                                                        |
| Q7TMB8 | CYFP1_MOUSE<br>Cytoplasmic FMR1-<br>interacting protein 1<br>OS=Mus musculus<br>GN=Cyfip1 PE=1 SV=1           | 9.9E-11 | 70.2 | 7.0  | 7 (7 0 0 0 0)      | Cytoplasm.<br>Cytoplasm $\hat{\epsilon}^{\circ}$<br>perinuclear region.<br>Cell projection $\hat{\epsilon}^{\circ}$<br>lamellipodium.<br>Cell projection $\hat{\epsilon}^{\circ}$<br>ruffle. Cell junction<br>$\hat{\epsilon}^{\circ}$ synapse $\hat{\epsilon}^{\circ}$<br>synaptosome. |
| Q5SXY1 | CYTSB_MOUSE Cytospin-<br>B OS=Mus musculus<br>GN=Cytsb PE=1 SV=2                                              | 1.3E-07 | 70.2 | 6.1  | 10 (10 0 0 0<br>0) | Nucleus.                                                                                                                                                                                                                                                                                |
| Q8BPM0 | DAAM1_MOUSE<br>Disheveled-associated<br>activator of morphogenesis 1<br>OS=Mus musculus<br>GN=Daam1 PE=2 SV=3 | 9.0E-07 | 40.2 | 4.6  | 4 (4 0 0 0 0)      | Cytoplasm.                                                                                                                                                                                                                                                                              |
| Q62165 | DAG1_MOUSE<br>Dystroglycan OS=Mus<br>musculus GN=Dag1 PE=1<br>SV=4                                            | 4.4E-15 | 50.2 | 9.0  | 8 (8 0 0 0 0)      | Secreted $\hat{\epsilon}^{\circ}$<br>extracellular space.<br>Cell membrane;<br>Single-pass type I<br>membrane protein.<br>Cytoplasm $\hat{\epsilon}^{\circ}$                                                                                                                            |

|            |                                                                                                     |         |      |      |                 |                                                |
|------------|-----------------------------------------------------------------------------------------------------|---------|------|------|-----------------|------------------------------------------------|
|            |                                                                                                     |         |      |      |                 | cytoskeleton.<br>Nucleus &°<br>nucleoplasm.    |
| Q9JII5     | DAZP1_MOUSE DAZ-associated protein 1 OS=Mus musculus GN=Dazap1 PE=2 SV=2                            | 2.6E-10 | 20.3 | 8.4  | 2 (2 0 0 0 0)   | Cytoplasm.<br>Nucleus.                         |
| Q8BHC4     | DCAKD_MOUSE Dephospho-CoA kinase domain-containing protein OS=Mus musculus GN=Dcakd PE=2 SV=1       | 3.9E-12 | 80.3 | 35.5 | 9 (9 0 0 0 0)   | ND                                             |
| Q91ZV3     | DCBD2_MOUSE Discoidin, CUB and LCCL domain-containing protein 2 OS=Mus musculus GN=Dcbld2 PE=2 SV=1 | 2.5E-05 | 20.1 | 3.0  | 3 (3 0 0 0 0)   | Membrane; Single-pass type I membrane protein. |
| O08788     | DCTN1_MOUSE Dynactin subunit 1 OS=Mus musculus GN=Dctn1 PE=1 SV=2                                   | 7.7E-09 | 20.2 | 2.3  | 2 (2 0 0 0 0)   | Cytoplasm.<br>Cytoplasm &°<br>cytoskeleton.    |
| Q9CWS0     | DDAH1_MOUSE N(G),N(G)-dimethylarginine dimethylaminohydrolase 1 OS=Mus musculus GN=Ddah1 PE=1 SV=3  | 1.4E-07 | 20.2 | 7.0  | 2 (2 0 0 0 0)   | ND                                             |
| Q99LD8     | DDAH2_MOUSE N(G),N(G)-dimethylarginine dimethylaminohydrolase 2 OS=Mus musculus GN=Ddah2 PE=1 SV=1  | 1.1E-16 | 70.3 | 36.8 | 12 (12 0 0 0 0) | ND                                             |
| Q80WW<br>9 | DDRGK_MOUSE DDRGK domain-containing protein 1 OS=Mus musculus GN=Ddrgrk1 PE=1 SV=2                  | 1.4E-14 | 40.2 | 16.8 | 5 (5 0 0 0 0)   | Endoplasmic reticulum.                         |
| Q501J6     | DDX17_MOUSE Probable ATP-dependent RNA helicase DDX17 OS=Mus musculus GN=Ddx17 PE=2 SV=1            | 8.2E-11 | 20.2 | 3.5  | 11 (11 0 0 0 0) | Nucleus.                                       |
| Q9JIK5     | DDX21_MOUSE Nucleolar RNA helicase 2 OS=Mus musculus GN=Ddx21 PE=1 SV=2                             | 5.1E-04 | 20.2 | 1.3  | 2 (2 0 0 0 0)   | Nucleus &°<br>nucleolus.                       |
| P16381     | DDX3L_MOUSE Putative ATP-dependent RNA helicase P110 OS=Mus musculus GN=D1Pas1 PE=1 SV=1            | 1.5E-12 | 80.3 | 15.5 | 13 (13 0 0 0 0) | ND                                             |
| Q61656     | DDX5_MOUSE Probable ATP-dependent RNA helicase DDX5 OS=Mus musculus GN=Ddx5 PE=1 SV=1               | 1.6E-13 | 40.3 | 6.8  | 5 (5 0 0 0 0)   | Nucleus &°<br>nucleolus.                       |

*A novel role of mitochondria in muscle injury*

|        |                                                                                                                                      |         |       |      |                    |                                                                                     |
|--------|--------------------------------------------------------------------------------------------------------------------------------------|---------|-------|------|--------------------|-------------------------------------------------------------------------------------|
| O09005 | DEGS1_MOUSE<br>Sphingolipid delta(4)-<br>desaturase DES1 OS=Mus<br>musculus GN=Degs1 PE=2<br>SV=1                                    | 4.2E-13 | 20.2  | 10.5 | 2 (2 0 0 0 0)      | Endoplasmic<br>reticulum<br>membrane; Multi-<br>pass membrane<br>protein.           |
| P31001 | DESM_MOUSE Desmin<br>OS=Mus musculus GN=Des<br>PE=1 SV=3                                                                             | 1.2E-14 | 238.3 | 51.4 | 49 (46 3 0 0<br>0) | Cytoplasm.                                                                          |
| O70503 | DHB12_MOUSE Estradiol<br>17-beta-dehydrogenase 12<br>OS=Mus musculus<br>GN=Hsd17b12 PE=2 SV=1                                        | 3.4E-14 | 50.2  | 19.2 | 10 (10 0 0 0<br>0) | Endoplasmic<br>reticulum<br>membrane; Multi-<br>pass membrane<br>protein.           |
| P26443 | DHE3_MOUSE Glutamate<br>dehydrogenase 1,<br>mitochondrial OS=Mus<br>musculus GN=Glud1 PE=1<br>SV=1                                   | 6.4E-11 | 110.3 | 24.4 | 12 (12 0 0 0<br>0) | Mitochondrion<br>matrix.                                                            |
| Q5SS80 | DHR13_MOUSE<br>Dehydrogenase/reductase<br>SDR family member 13<br>OS=Mus musculus<br>GN=Dhrs13 PE=1 SV=1                             | 3.2E-06 | 20.1  | 5.9  | 2 (2 0 0 0 0)      | Secreted.                                                                           |
| Q8K2B3 | DHSA_MOUSE Succinate<br>dehydrogenase [ubiquinone]<br>flavoprotein subunit,<br>mitochondrial OS=Mus<br>musculus GN=Sdha PE=1<br>SV=1 | 3.7E-09 | 40.2  | 6.6  | 6 (6 0 0 0 0)      | Mitochondrion<br>inner membrane;<br>Peripheral<br>membrane protein;<br>Matrix side. |
| Q9CQA3 | DHSB_MOUSE Succinate<br>dehydrogenase [ubiquinone]<br>iron-sulfur subunit,<br>mitochondrial OS=Mus<br>musculus GN=Sdhb PE=1<br>SV=1  | 1.6E-10 | 60.2  | 18.8 | 6 (6 0 0 0 0)      | Mitochondrion<br>inner membrane;<br>Peripheral<br>membrane protein;<br>Matrix side. |
| Q9QZD8 | DIC_MOUSE Mitochondrial<br>dicarboxylate carrier<br>OS=Mus musculus<br>GN=Slc25a10 PE=2 SV=2                                         | 2.1E-14 | 50.3  | 23.0 | 7 (7 0 0 0 0)      | Mitochondrion<br>inner membrane;<br>Multi-pass<br>membrane protein.                 |
| Q99KV1 | DJB11_MOUSE DnaJ<br>homolog subfamily B<br>member 11 OS=Mus<br>musculus GN=Dnajb11<br>PE=1 SV=1                                      | 3.7E-06 | 30.2  | 8.7  | 3 (3 0 0 0 0)      | Endoplasmic<br>reticulum lumen.                                                     |
| Q80TN4 | DJC16_MOUSE DnaJ<br>homolog subfamily C<br>member 16 OS=Mus<br>musculus GN=Dnajc16<br>PE=1 SV=2                                      | 4.2E-05 | 20.1  | 2.5  | 2 (2 0 0 0 0)      | Membrane; Single-<br>pass type IV<br>membrane protein.                              |
| O08749 | DLDH_MOUSE<br>Dihydrolipoyl<br>dehydrogenase,<br>mitochondrial OS=Mus<br>musculus GN=Dld PE=1<br>SV=2                                | 2.7E-09 | 50.3  | 10.6 | 5 (5 0 0 0 0)      | Mitochondrion<br>matrix.                                                            |

|        |                                                                                              |         |       |      |                 |                                                                                                                                                                                                                                                                                                     |
|--------|----------------------------------------------------------------------------------------------|---------|-------|------|-----------------|-----------------------------------------------------------------------------------------------------------------------------------------------------------------------------------------------------------------------------------------------------------------------------------------------------|
| Q811D0 | DLG1_MOUSE Disks large homolog 1 OS=Mus musculus GN=Dlg1 PE=1 SV=1                           | 5.3E-09 | 30.2  | 3.8  | 6 (6 0 0 0 0)   | Membrane; Peripheral membrane protein. Basolateral cell membrane. Endoplasmic reticulum membrane. Cell junction $\hat{\epsilon}^{\circ}$ synapse $\hat{\epsilon}^{\circ}$ postsynaptic cell membrane $\hat{\epsilon}^{\circ}$ postsynaptic density. Cell junction $\hat{\epsilon}^{\circ}$ synapse. |
| P63037 | DNJA1_MOUSE DnaJ homolog subfamily A member 1 OS=Mus musculus GN=Dnaja1 PE=1 SV=1            | 5.0E-08 | 40.2  | 12.6 | 4 (4 0 0 0 0)   | Membrane; Lipid-anchor.                                                                                                                                                                                                                                                                             |
| P13864 | DNMT1_MOUSE DNA (cytosine-5)-methyltransferase 1 OS=Mus musculus GN=Dnmt1 PE=1 SV=5          | 2.8E-05 | 20.1  | 0.7  | 3 (3 0 0 0 0)   | Nucleus. Cytoplasm.                                                                                                                                                                                                                                                                                 |
| O70152 | DPM1_MOUSE Dolichol-phosphate mannosyltransferase OS=Mus musculus GN=Dpm1 PE=2 SV=1          | 2.1E-08 | 20.2  | 9.6  | 2 (2 0 0 0 0)   | Endoplasmic reticulum.                                                                                                                                                                                                                                                                              |
| Q9QXS6 | DREB_MOUSE Drebrin OS=Mus musculus GN=Dbn1 PE=1 SV=4                                         | 2.1E-14 | 30.3  | 6.7  | 3 (3 0 0 0 0)   | Cytoplasm.                                                                                                                                                                                                                                                                                          |
| Q99J47 | DRS7B_MOUSE Dehydrogenase/reductase SDR family member 7B OS=Mus musculus GN=Dhrs7b PE=2 SV=1 | 8.8E-05 | 20.1  | 9.6  | 2 (2 0 0 0 0)   | Peroxisome membrane; Single-pass type II membrane protein.                                                                                                                                                                                                                                          |
| Q9JHU4 | DYHC1_MOUSE Cytoplasmic dynein 1 heavy chain 1 OS=Mus musculus GN=Dync1h1 PE=1 SV=1          | 2.7E-14 | 440.3 | 10.7 | 47 (47 0 0 0 0) | Cytoplasm $\hat{\epsilon}^{\circ}$ cytoskeleton.                                                                                                                                                                                                                                                    |
| Q9Z2H5 | E41L1_MOUSE Band 4.1-like protein 1 OS=Mus musculus GN=Epb4111 PE=1 SV=2                     | 5.6E-06 | 30.2  | 4.2  | 3 (3 0 0 0 0)   | Cytoplasm $\hat{\epsilon}^{\circ}$ cytoskeleton.                                                                                                                                                                                                                                                    |
| O70318 | E41L2_MOUSE Band 4.1-like protein 2 OS=Mus musculus GN=Epb4112 PE=1 SV=1                     | 1.1E-15 | 220.3 | 28.4 | 26 (26 0 0 0 0) | Cytoplasm $\hat{\epsilon}^{\circ}$ cytoskeleton.                                                                                                                                                                                                                                                    |
| Q9WV92 | E41L3_MOUSE Band 4.1-like protein 3 OS=Mus musculus GN=Epb4113 PE=1 SV=1                     | 1.6E-10 | 120.3 | 17.9 | 19 (19 0 0 0 0) | Cytoplasm $\hat{\epsilon}^{\circ}$ cytoskeleton.                                                                                                                                                                                                                                                    |

*A novel role of mitochondria in muscle injury*

|        |                                                                                                             |         |       |      |                 |                                                            |
|--------|-------------------------------------------------------------------------------------------------------------|---------|-------|------|-----------------|------------------------------------------------------------|
| Q4PZA2 | ECE1_MOUSE Endothelin-converting enzyme 1<br>OS=Mus musculus<br>GN=Ece1 PE=1 SV=1                           | 1.7E-13 | 70.3  | 12.4 | 16 (16 0 0 0 0) | Cell membrane;<br>Single-pass type II<br>membrane protein. |
| Q8BMS1 | ECHA_MOUSE<br>Trifunctional enzyme subunit<br>alpha, mitochondrial<br>OS=Mus musculus<br>GN=Hadha PE=1 SV=1 | 2.2E-15 | 150.3 | 24.9 | 18 (18 0 0 0 0) | Mitochondrion<br>matrix.                                   |
| Q99JY0 | ECHB_MOUSE<br>Trifunctional enzyme subunit<br>beta, mitochondrial OS=Mus<br>musculus GN=Hadhb PE=1<br>SV=1  | 9.6E-06 | 30.1  | 6.1  | 3 (3 0 0 0 0)   | Mitochondrion<br>matrix.                                   |
| Q8BH95 | ECHM_MOUSE Enoyl-CoA<br>hydratase, mitochondrial<br>OS=Mus musculus<br>GN=Echs1 PE=1 SV=1                   | 1.6E-07 | 38.2  | 8.6  | 4 (3 1 0 0 0)   | Mitochondrion<br>matrix.                                   |
| Q3UJB9 | EDC4_MOUSE Enhancer of<br>mRNA-decapping protein 4<br>OS=Mus musculus<br>GN=Edc4 PE=1 SV=2                  | 1.7E-12 | 30.2  | 3.5  | 3 (3 0 0 0 0)   | Cytoplasm & P-<br>body. Nucleus.                           |
| P10126 | EF1A1_MOUSE Elongation<br>factor 1-alpha 1 OS=Mus<br>musculus GN=Eef1a1 PE=1<br>SV=3                        | 2.9E-09 | 70.2  | 15.8 | 22 (22 0 0 0 0) | Cytoplasm.                                                 |
| O70251 | EF1B_MOUSE Elongation<br>factor 1-beta OS=Mus<br>musculus GN=Eef1b PE=1<br>SV=5                             | 7.8E-13 | 20.3  | 12.4 | 3 (3 0 0 0 0)   | ND                                                         |
| P57776 | EF1D_MOUSE Elongation<br>factor 1-delta OS=Mus<br>musculus GN=Eef1d PE=1<br>SV=3                            | 2.6E-09 | 50.2  | 26.3 | 6 (6 0 0 0 0)   | ND                                                         |
| Q9D8N0 | EF1G_MOUSE Elongation<br>factor 1-gamma OS=Mus<br>musculus GN=Eef1g PE=1<br>SV=3                            | 5.5E-08 | 30.2  | 7.6  | 6 (6 0 0 0 0)   | ND                                                         |
| P58252 | EF2_MOUSE Elongation<br>factor 2 OS=Mus musculus<br>GN=Eef2 PE=1 SV=2                                       | 7.0E-12 | 110.3 | 14.3 | 20 (20 0 0 0 0) | Cytoplasm.                                                 |
| P52795 | EFNB1_MOUSE Ephrin-B1<br>OS=Mus musculus<br>GN=Efnb1 PE=1 SV=1                                              | 9.2E-07 | 30.2  | 14.2 | 8 (8 0 0 0 0)   | Membrane; Single-<br>pass type I<br>membrane protein.      |
| Q8BG67 | EFR3A_MOUSE Protein<br>EFR3 homolog A OS=Mus<br>musculus GN=Efr3a PE=1<br>SV=1                              | 2.3E-08 | 30.2  | 6.3  | 3 (3 0 0 0 0)   | Cell membrane.                                             |
| Q8BFR5 | EFTU_MOUSE Elongation<br>factor Tu, mitochondrial<br>OS=Mus musculus<br>GN=Tufm PE=1 SV=1                   | 1.6E-09 | 30.2  | 9.1  | 3 (3 0 0 0 0)   | Mitochondrion.                                             |

|        |                                                                                                           |         |      |      |               |                                                                                                                                                                                                                                                     |
|--------|-----------------------------------------------------------------------------------------------------------|---------|------|------|---------------|-----------------------------------------------------------------------------------------------------------------------------------------------------------------------------------------------------------------------------------------------------|
| Q01279 | EGFR_MOUSE Epidermal growth factor receptor<br>OS=Mus musculus GN=Egfr<br>PE=1 SV=1                       | 7.7E-07 | 30.2 | 2.7  | 4 (4 0 0 0 0) | Membrane; Single-pass type I membrane protein. Endoplasmic reticulum membrane; Single-pass type I membrane protein. Golgi apparatus membrane; Single-pass type I membrane protein. Nucleus membrane; Single-pass type I membrane protein. Endosome. |
| Q9WVK4 | EHD1_MOUSE EH domain-containing protein 1<br>OS=Mus musculus<br>GN=Ehd1 PE=1 SV=1                         | 4.8E-06 | 60.2 | 13.3 | 8 (8 0 0 0 0) | Cell membrane; Peripheral membrane protein; Cytoplasmic side. Early endosome membrane; Peripheral membrane protein. Recycling endosome membrane; Peripheral membrane protein.                                                                       |
| Q8BH64 | EHD2_MOUSE EH domain-containing protein 2<br>OS=Mus musculus<br>GN=Ehd2 PE=1 SV=1                         | 4.6E-08 | 40.2 | 7.0  | 5 (5 0 0 0 0) | Cell membrane; Peripheral membrane protein; Cytoplasmic side. Endosome membrane; Peripheral membrane protein.                                                                                                                                       |
| Q9EQP2 | EHD4_MOUSE EH domain-containing protein 4<br>OS=Mus musculus<br>GN=Ehd4 PE=1 SV=1                         | 4.5E-08 | 80.2 | 17.0 | 8 (8 0 0 0 0) | Early endosome membrane; Peripheral membrane protein. Recycling endosome membrane; Peripheral membrane protein.                                                                                                                                     |
| P23116 | EIF3A_MOUSE Eukaryotic translation initiation factor 3 subunit A<br>OS=Mus musculus<br>GN=Eif3a PE=1 SV=4 | 1.1E-11 | 50.2 | 4.6  | 8 (8 0 0 0 0) | Cytoplasm. Cytoplasmic centrosome. Nucleus.                                                                                                                                                                                                         |
| Q8JZQ9 | EIF3B_MOUSE Eukaryotic translation initiation factor 3 subunit B<br>OS=Mus musculus                       | 4.6E-11 | 60.2 | 9.6  | 6 (6 0 0 0 0) | Cytoplasm.                                                                                                                                                                                                                                          |

|        |                                                                                                     |         |       |      |                 |                                                                                                                                                                                                                          |
|--------|-----------------------------------------------------------------------------------------------------|---------|-------|------|-----------------|--------------------------------------------------------------------------------------------------------------------------------------------------------------------------------------------------------------------------|
|        | GN=Eif3b PE=1 SV=1                                                                                  |         |       |      |                 |                                                                                                                                                                                                                          |
| O70194 | EIF3D_MOUSE Eukaryotic translation initiation factor 3 subunit D OS=Mus musculus GN=Eif3d PE=1 SV=2 | 2.0E-06 | 30.2  | 6.6  | 3 (3 0 0 0 0)   | Cytoplasm.                                                                                                                                                                                                               |
| Q9Z1D1 | EIF3G_MOUSE Eukaryotic translation initiation factor 3 subunit G OS=Mus musculus GN=Eif3g PE=1 SV=2 | 3.7E-05 | 20.2  | 5.6  | 2 (2 0 0 0 0)   | Cytoplasm.<br>Nucleus.<br>Cytoplasmic perinuclear region.                                                                                                                                                                |
| Q8QZY1 | EIF3L_MOUSE Eukaryotic translation initiation factor 3 subunit L OS=Mus musculus GN=Eif3l PE=1 SV=1 | 9.4E-10 | 30.2  | 6.7  | 3 (3 0 0 0 0)   | Cytoplasm.                                                                                                                                                                                                               |
| P70290 | EM55_MOUSE 55 kDa erythrocyte membrane protein OS=Mus musculus GN=Mpp1 PE=1 SV=1                    | 1.5E-06 | 20.1  | 4.5  | 3 (3 0 0 0 0)   | Membrane;<br>Peripheral membrane protein.<br>Cell projection stereocilium.                                                                                                                                               |
| O08579 | EMD_MOUSE Emerin OS=Mus musculus GN=Emd PE=1 SV=1                                                   | 1.2E-07 | 20.1  | 8.9  | 2 (2 0 0 0 0)   | Nucleus inner membrane; Single-pass membrane protein;<br>Nucleoplasmic side. Nucleus outer membrane.                                                                                                                     |
| P17182 | ENOA_MOUSE Alpha-enolase OS=Mus musculus GN=Eno1 PE=1 SV=3                                          | 4.8E-11 | 68.2  | 16.6 | 8 (7 1 0 0 0)   | Cytoplasm. Cell membrane.                                                                                                                                                                                                |
| P08113 | ENPL_MOUSE Endoplasmic reticulum protein OS=Mus musculus GN=Hsp90b1 PE=1 SV=2                       | 1.2E-13 | 318.3 | 33.0 | 58 (57 1 0 0 0) | Endoplasmic reticulum lumen.<br>Melanosome.                                                                                                                                                                              |
| P10404 | ENV1_MOUSE MLV-related proviral Env polyprotein OS=Mus musculus PE=2 SV=3                           | 8.5E-12 | 80.3  | 12.2 | 14 (14 0 0 0 0) | Virion membrane;<br>Single-pass type I membrane protein.<br>Cell membrane;<br>Single-pass type I membrane protein.<br>Virion membrane;<br>Peripheral membrane protein.<br>Cell membrane;<br>Peripheral membrane protein. |
| Q60750 | EPHA1_MOUSE Ephrin type-A receptor 1 OS=Mus musculus GN=Epha1 PE=1 SV=2                             | 6.4E-07 | 40.2  | 4.7  | 5 (5 0 0 0 0)   | Membrane; Single-pass type I membrane protein.                                                                                                                                                                           |
| Q03145 | EPHA2_MOUSE Ephrin type-A receptor 2 OS=Mus musculus GN=Epha2 PE=1 SV=2                             | 5.1E-14 | 170.3 | 20.0 | 43 (43 0 0 0 0) | Cell membrane;<br>Single-pass type I membrane protein.<br>Cell projection ruffle membrane;                                                                                                                               |



|        |                                                                                                                |         |      |      |               |                                                                                                                                                                                                                                   |
|--------|----------------------------------------------------------------------------------------------------------------|---------|------|------|---------------|-----------------------------------------------------------------------------------------------------------------------------------------------------------------------------------------------------------------------------------|
|        |                                                                                                                |         |      |      |               | Single-pass type I membrane protein. Cell projection &#x2013; lamellipodium membrane; Single-pass type I membrane protein. Cell junction &#x2013; focal adhesion.                                                                 |
| Q99KN9 | EPN4_MOUSE Clathrin interactor 1 OS=Mus musculus GN=Clint1 PE=1 SV=2                                           | 5.6E-09 | 40.2 | 7.6  | 4 (4 0 0 0 0) | Cytoplasm. Cytoplasm &#x2013; perinuclear region. Membrane; Peripheral membrane protein. Cytoplasmic vesicle &#x2013; clathrin-coated vesicle.                                                                                    |
| Q9EQH2 | ERAP1_MOUSE Endoplasmic reticulum aminopeptidase 1 OS=Mus musculus GN=Erap1 PE=2 SV=1                          | 5.3E-09 | 30.2 | 4.0  | 4 (4 0 0 0 0) | Endoplasmic reticulum membrane; Single-pass type II membrane protein.                                                                                                                                                             |
| Q9DC16 | ERG11_MOUSE Endoplasmic reticulum-Golgi intermediate compartment protein 1 OS=Mus musculus GN=Ergic1 PE=1 SV=1 | 1.1E-13 | 70.2 | 26.9 | 7 (7 0 0 0 0) | Endoplasmic reticulum membrane; Multi-pass membrane protein. Endoplasmic reticulum-Golgi intermediate compartment membrane; Multi-pass membrane protein. Golgi apparatus membrane; Multi-pass membrane protein.                   |
| Q9CQE7 | ERG13_MOUSE Endoplasmic reticulum-Golgi intermediate compartment protein 3 OS=Mus musculus GN=Ergic3 PE=2 SV=1 | 3.4E-07 | 30.2 | 7.3  | 3 (3 0 0 0 0) | Endoplasmic reticulum-Golgi intermediate compartment membrane; Multi-pass membrane protein. Golgi apparatus &#x2013; cis-Golgi network membrane; Multi-pass membrane protein. Endoplasmic reticulum membrane; Multi-pass membrane |

|        |                                                                                                          |         |       |      |                 |                                                                                                                                       |
|--------|----------------------------------------------------------------------------------------------------------|---------|-------|------|-----------------|---------------------------------------------------------------------------------------------------------------------------------------|
|        |                                                                                                          |         |       |      |                 | protein.                                                                                                                              |
| Q91X78 | ERLN1_MOUSE Erlin-1<br>OS=Mus musculus<br>GN=Erlin1 PE=2 SV=1                                            | 6.8E-09 | 60.2  | 17.3 | 6 (6 0 0 0 0)   | Endoplasmic reticulum membrane; Single-pass type II membrane protein.                                                                 |
| Q8BFZ9 | ERLN2_MOUSE Erlin-2<br>OS=Mus musculus<br>GN=Erlin2 PE=1 SV=1                                            | 3.5E-13 | 30.3  | 13.2 | 4 (4 0 0 0 0)   | Endoplasmic reticulum membrane; Single-pass type II membrane protein.                                                                 |
| Q3UVK0 | ERMP1_MOUSE<br>Endoplasmic reticulum metalloproteinase 1 OS=Mus musculus GN=Ermp1 PE=1 SV=2              | 5.5E-07 | 20.2  | 2.2  | 3 (3 0 0 0 0)   | Endoplasmic reticulum membrane; Multi-pass membrane protein.                                                                          |
| P57759 | ERP29_MOUSE<br>Endoplasmic reticulum protein ERp29 OS=Mus musculus GN=Erp29 PE=1 SV=2                    | 3.6E-06 | 30.2  | 12.2 | 5 (5 0 0 0 0)   | Endoplasmic reticulum lumen. Melanosome.                                                                                              |
| Q3U7R1 | ESYT1_MOUSE Extended synaptotagmin-1 OS=Mus musculus GN=Esyt1 PE=2 SV=2                                  | 1.0E-30 | 360.3 | 38.7 | 71 (71 0 0 0 0) | Membrane; Multi-pass membrane protein. Endomembrane system; Multi-pass membrane protein.                                              |
| Q3TZZ7 | ESYT2_MOUSE Extended synaptotagmin-2 OS=Mus musculus GN=Esyt2 PE=1 SV=1                                  | 1.1E-14 | 180.3 | 29.2 | 27 (27 0 0 0 0) | Cell membrane; Multi-pass membrane protein.                                                                                           |
| Q99LC5 | ETFA_MOUSE Electron transfer flavoprotein subunit alpha, mitochondrial OS=Mus musculus GN=Etfa PE=1 SV=2 | 1.2E-12 | 30.3  | 13.8 | 3 (3 0 0 0 0)   | Mitochondrion matrix.                                                                                                                 |
| Q9DCW4 | ETFB_MOUSE Electron transfer flavoprotein subunit beta OS=Mus musculus GN=Etfb PE=1 SV=3                 | 5.3E-06 | 50.2  | 24.7 | 5 (5 0 0 0 0)   | Mitochondrion matrix.                                                                                                                 |
| P70428 | EXT2_MOUSE Exostosin-2 OS=Mus musculus GN=Ext2 PE=1 SV=1                                                 | 3.3E-05 | 20.1  | 2.8  | 3 (3 0 0 0 0)   | Endoplasmic reticulum membrane; Single-pass type II membrane protein. Golgi apparatus membrane; Single-pass type II membrane protein. |

*A novel role of mitochondria in muscle injury*

|        |                                                                                  |         |       |      |                 |                                                                                                                                                                                                                                                                                                                                                                                                               |
|--------|----------------------------------------------------------------------------------|---------|-------|------|-----------------|---------------------------------------------------------------------------------------------------------------------------------------------------------------------------------------------------------------------------------------------------------------------------------------------------------------------------------------------------------------------------------------------------------------|
| P26040 | EZRI_MOUSE Ezrin<br>OS=Mus musculus GN=Ezr<br>PE=1 SV=3                          | 5.4E-09 | 60.2  | 7.7  | 8 (8 0 0 0 0)   | Apical cell membrane; Peripheral membrane protein; Cytoplasmic side. Cell projection. Cell projection $\hat{\epsilon}^{\circ}$ microvillus membrane; Peripheral membrane protein; Cytoplasmic side. Cell projection $\hat{\epsilon}^{\circ}$ ruffle membrane; Peripheral membrane protein; Cytoplasmic side. Cytoplasm $\hat{\epsilon}^{\circ}$ cell cortex. Cytoplasm $\hat{\epsilon}^{\circ}$ cytoskeleton. |
| Q8VE91 | F134B_MOUSE Protein FAM134B OS=Mus musculus GN=Fam134b PE=1 SV=1                 | 3.5E-06 | 30.2  | 9.8  | 3 (3 0 0 0 0)   | Golgi apparatus $\hat{\epsilon}^{\circ}$ cis-Golgi network membrane; Single-pass membrane protein.                                                                                                                                                                                                                                                                                                            |
| Q9CQV4 | F134C_MOUSE Protein FAM134C OS=Mus musculus GN=Fam134c PE=2 SV=1                 | 3.5E-10 | 30.2  | 8.4  | 3 (3 0 0 0 0)   | Membrane; Multi-pass membrane protein.                                                                                                                                                                                                                                                                                                                                                                        |
| Q9D6U8 | F162A_MOUSE UPF0389 protein FAM162A OS=Mus musculus GN=Fam162a PE=2 SV=1         | 2.7E-08 | 20.2  | 16.1 | 4 (4 0 0 0 0)   | Membrane; Single-pass membrane protein.                                                                                                                                                                                                                                                                                                                                                                       |
| Q921M7 | FA49B_MOUSE Protein FAM49B OS=Mus musculus GN=Fam49b PE=2 SV=1                   | 2.0E-14 | 30.3  | 13.9 | 3 (3 0 0 0 0)   | ND                                                                                                                                                                                                                                                                                                                                                                                                            |
| Q80W54 | FACE1_MOUSE CAAX prenyl protease 1 homolog OS=Mus musculus GN=Zmpste24 PE=1 SV=2 | 1.6E-13 | 58.3  | 12.2 | 9 (8 1 0 0 0)   | Endoplasmic reticulum membrane; Multi-pass membrane protein. Golgi apparatus membrane; Multi-pass membrane protein.                                                                                                                                                                                                                                                                                           |
| Q922J9 | FACR1_MOUSE Fatty acyl-CoA reductase 1 OS=Mus musculus GN=Far1 PE=1 SV=1         | 1.0E-09 | 150.2 | 29.7 | 15 (15 0 0 0 0) | Peroxisome membrane; Single-pass membrane protein.                                                                                                                                                                                                                                                                                                                                                            |
| Q9Z0R9 | FADS2_MOUSE Fatty acid desaturase 2 OS=Mus musculus GN=Fads2 PE=2 SV=1           | 7.9E-09 | 40.2  | 10.6 | 4 (4 0 0 0 0)   | Endoplasmic reticulum membrane; Multi-pass membrane protein.                                                                                                                                                                                                                                                                                                                                                  |

*A novel role of mitochondria in muscle injury*

|        |                                                                           |         |       |      |                   |                                                                                                                             |
|--------|---------------------------------------------------------------------------|---------|-------|------|-------------------|-----------------------------------------------------------------------------------------------------------------------------|
| Q3TDN2 | FAF2_MOUSE FAS-associated factor 2 OS=Mus musculus GN=Faf2 PE=2 SV=2      | 5.5E-08 | 40.3  | 10.6 | 4 (4 0 0 0 0)     | Cytoplasm. Lipid droplet. Endoplasmic reticulum.                                                                            |
| Q91VU0 | FAM3C_MOUSE Protein FAM3C OS=Mus musculus GN=Fam3c PE=1 SV=1              | 7.4E-08 | 40.2  | 20.7 | 6 (6 0 0 0 0)     | Secreted. Cytoplasmic vesicle.                                                                                              |
| P19096 | FAS_MOUSE Fatty acid synthase OS=Mus musculus GN=Fasn PE=1 SV=2           | 1.4E-11 | 160.2 | 8.3  | 20 (20 0 0 0 0)   | Cytoplasm. Melanosome.                                                                                                      |
| Q8CIB5 | FERM2_MOUSE Fermitin family homolog 2 OS=Mus musculus GN=Fermt2 PE=1 SV=1 | 4.5E-12 | 20.2  | 4.7  | 3 (3 0 0 0 0)     | Cytoplasm &° cell cortex. Cytoplasm &° cytoskeleton. Cell junction &° focal adhesion.                                       |
| P11276 | FINC_MOUSE Fibronectin OS=Mus musculus GN=Fn1 PE=1 SV=3                   | 3.3E-16 | 240.3 | 11.7 | 76 (76 0 0 0 0)   | Secreted &° extracellular space &° extracellular matrix.                                                                    |
| Q9D1M7 | FKB11_MOUSE FK506-binding protein 11 OS=Mus musculus GN=Fkbp11 PE=2 SV=1  | 3.9E-10 | 30.2  | 14.4 | 3 (3 0 0 0 0)     | Membrane; Single-pass membrane protein.                                                                                     |
| O35465 | FKBP8_MOUSE FK506-binding protein 8 OS=Mus musculus GN=Fkbp8 PE=1 SV=2    | 2.6E-11 | 20.2  | 7.7  | 3 (3 0 0 0 0)     | Mitochondrion membrane; Single-pass membrane protein; Cytoplasmic side.                                                     |
| Q8BTM8 | FLNA_MOUSE Filamin-A OS=Mus musculus GN=Flna PE=1 SV=4                    | 1.7E-14 | 790.3 | 36.5 | 162 (162 0 0 0 0) | Cytoplasm &° cell cortex. Cytoplasm &° cytoskeleton.                                                                        |
| Q80X90 | FLNB_MOUSE Filamin-B OS=Mus musculus GN=Flnb PE=1 SV=2                    | 1.1E-16 | 360.3 | 17.2 | 37 (37 0 0 0 0)   | Cytoplasm &° cell cortex. Cytoplasm &° myofibril &° sarcomere &° Z line. Cytoplasm &° cytoskeleton.                         |
| Q8VHX6 | FLNC_MOUSE Filamin-C OS=Mus musculus GN=Flnc PE=1 SV=3                    | 1.1E-11 | 310.3 | 14.7 | 37 (37 0 0 0 0)   | Cytoplasm. Membrane; Peripheral membrane protein. Cytoplasm &° cytoskeleton. Cytoplasm &° myofibril &° sarcomere &° Z line. |
| O08917 | FLOT1_MOUSE Flotillin-1 OS=Mus musculus GN=Flot1 PE=1 SV=1                | 2.1E-13 | 30.3  | 10.3 | 3 (3 0 0 0 0)     | Cell membrane; Peripheral membrane protein. Membrane &° caveola; Peripheral membrane protein. Melanosome. Endosome.         |

*A novel role of mitochondria in muscle injury*

|            |                                                                                                                |         |       |      |                    |                                                                                                                                                                                                                  |
|------------|----------------------------------------------------------------------------------------------------------------|---------|-------|------|--------------------|------------------------------------------------------------------------------------------------------------------------------------------------------------------------------------------------------------------|
| Q60634     | FLOT2_MOUSE Flotillin-2<br>OS=Mus musculus<br>GN=Flot2 PE=1 SV=2                                               | 3.7E-10 | 80.2  | 19.9 | 9 (9 0 0 0 0)      | Cell membrane;<br>Peripheral<br>membrane protein.<br>Membrane $\hat{\epsilon}^{\circ}$<br>caveola; Peripheral<br>membrane protein.<br>Endosome.                                                                  |
| Q6ZPF4     | FMNL3_MOUSE Formin-<br>like protein 3 OS=Mus<br>musculus GN=Fmnl3 PE=2<br>SV=2                                 | 2.2E-07 | 50.2  | 4.2  | 6 (6 0 0 0 0)      | ND                                                                                                                                                                                                               |
| P50285     | FMO1_MOUSE<br>Dimethylaniline<br>monooxygenase [N-oxide-<br>forming] 1 OS=Mus<br>musculus GN=Fmo1 PE=1<br>SV=1 | 2.6E-08 | 20.2  | 3.6  | 2 (2 0 0 0 0)      | Microsome<br>membrane.<br>Endoplasmic<br>reticulum<br>membrane.                                                                                                                                                  |
| Q6NWW<br>9 | FND3B_MOUSE<br>Fibronectin type III domain-<br>containing protein 3B<br>OS=Mus musculus<br>GN=Fndc3b PE=1 SV=1 | 2.6E-06 | 20.1  | 2.5  | 2 (2 0 0 0 0)      | Membrane; Single-<br>pass membrane<br>protein.                                                                                                                                                                   |
| Q9WV91     | FPRP_MOUSE<br>Prostaglandin F2 receptor<br>negative regulator OS=Mus<br>musculus GN=Ptgfrn PE=1<br>SV=1        | 7.0E-10 | 110.2 | 10.6 | 11 (11 0 0 0<br>0) | Endoplasmic<br>reticulum<br>membrane; Single-<br>pass type I<br>membrane protein.<br>Golgi apparatus $\hat{\epsilon}^{\circ}$<br>trans-Golgi<br>network<br>membrane; Single-<br>pass type I<br>membrane protein. |
| P29391     | FRIL1_MOUSE Ferritin<br>light chain 1 OS=Mus<br>musculus GN=Ftl1 PE=1<br>SV=2                                  | 1.6E-07 | 20.2  | 15.8 | 2 (2 0 0 0 0)      | ND                                                                                                                                                                                                               |
| Q61553     | FSCN1_MOUSE Fascin<br>OS=Mus musculus<br>GN=Fscn1 PE=1 SV=4                                                    | 1.3E-08 | 60.2  | 13.0 | 6 (6 0 0 0 0)      | Cytoplasm $\hat{\epsilon}^{\circ}$<br>cytoskeleton. Cell<br>projection $\hat{\epsilon}^{\circ}$<br>filopodium. Cell<br>projection $\hat{\epsilon}^{\circ}$<br>invadopodium.                                      |
| Q3U0V1     | FUBP2_MOUSE Far<br>upstream element-binding<br>protein 2 OS=Mus musculus<br>GN=Khsrp PE=1 SV=1                 | 3.2E-07 | 30.1  | 4.8  | 3 (3 0 0 0 0)      | Nucleus.<br>Cytoplasm.                                                                                                                                                                                           |
| Q9WTS2     | FUT8_MOUSE Alpha-(1,6)-<br>fucosyltransferase OS=Mus<br>musculus GN=Fut8 PE=2<br>SV=1                          | 3.0E-12 | 30.2  | 6.3  | 3 (3 0 0 0 0)      | Golgi apparatus $\hat{\epsilon}^{\circ}$<br>Golgi stack<br>membrane; Single-<br>pass type II<br>membrane protein.                                                                                                |
| P39688     | FYN_MOUSE Proto-<br>oncogene tyrosine-protein<br>kinase Fyn OS=Mus                                             | 3.8E-08 | 28.2  | 6.7  | 4 (2 2 0 0 0)      | Cell membrane.                                                                                                                                                                                                   |

|        |                                                                                                                           |         |       |      |                 |                                                                                           |  |
|--------|---------------------------------------------------------------------------------------------------------------------------|---------|-------|------|-----------------|-------------------------------------------------------------------------------------------|--|
|        | musculus GN=Fyn PE=1 SV=3                                                                                                 |         |       |      |                 |                                                                                           |  |
| P97855 | G3BP1_MOUSE Ras GTPase-activating protein-binding protein 1 OS=Mus musculus GN=G3bp1 PE=1 SV=1                            | 3.2E-12 | 60.3  | 19.8 | 11 (11 0 0 0 0) | Cytoplasm. Cytoplasm â€° cytosol. Cell membrane. Nucleus.                                 |  |
| P97379 | G3BP2_MOUSE Ras GTPase-activating protein-binding protein 2 OS=Mus musculus GN=G3bp2 PE=1 SV=2                            | 6.7E-15 | 40.3  | 11.8 | 5 (5 0 0 0 0)   | ND                                                                                        |  |
| P16858 | G3P_MOUSE Glyceraldehyde-3-phosphate dehydrogenase OS=Mus musculus GN=Gapdh PE=1 SV=2                                     | 1.1E-15 | 60.3  | 18.9 | 9 (9 0 0 0 0)   | Cytoplasm â€° cytosol. Nucleus.                                                           |  |
| Q9CR59 | G45IP_MOUSE Growth arrest and DNA-damage-inducible proteins-interacting protein 1 OS=Mus musculus GN=Gadd45gip1 PE=2 SV=1 | 4.9E-06 | 30.1  | 12.2 | 3 (3 0 0 0 0)   | Nucleus.                                                                                  |  |
| P11365 | GAG_IPMA Retrovirus-related Gag polyprotein OS=Mouse intracisternal a-particle MIA14 GN=gag PE=4 SV=2                     | 6.6E-11 | 20.3  | 4.0  | 2 (2 0 0 0 0)   | ND                                                                                        |  |
| O08912 | GALT1_MOUSE Polypeptide N-acetylgalactosaminyltransferase 1 OS=Mus musculus GN=Galnt1 PE=1 SV=1                           | 2.7E-08 | 30.2  | 6.1  | 3 (3 0 0 0 0)   | Golgi apparatus â€° Golgi stack membrane; Single-pass type II membrane protein. Secreted. |  |
| Q6PB93 | GALT2_MOUSE Polypeptide N-acetylgalactosaminyltransferase 2 OS=Mus musculus GN=Galnt2 PE=2 SV=1                           | 1.4E-14 | 50.3  | 11.9 | 6 (6 0 0 0 0)   | Golgi apparatus â€° Golgi stack membrane; Single-pass type II membrane protein. Secreted. |  |
| Q8BHN3 | GANAB_MOUSE Neutral alpha-glucosidase AB OS=Mus musculus GN=Ganab PE=1 SV=1                                               | 1.2E-12 | 210.2 | 25.3 | 25 (25 0 0 0 0) | Endoplasmic reticulum. Golgi apparatus. Melanosome.                                       |  |
| Q9CYL5 | GAPR1_MOUSE Golgi-associated plant pathogenesis-related protein 1 OS=Mus musculus GN=Glpr2 PE=2 SV=3                      | 1.0E-09 | 50.2  | 45.5 | 8 (8 0 0 0 0)   | Golgi apparatus membrane; Lipid-anchor.                                                   |  |
| P62874 | GBB1_MOUSE Guanine nucleotide-binding protein G(I)/G(S)/G(T) subunit beta-1 OS=Mus musculus GN=Gnb1 PE=1 SV=3             | 6.6E-09 | 50.2  | 12.4 | 12 (12 0 0 0 0) | ND                                                                                        |  |

|        |                                                                                                               |         |       |      |                 |                                                                                                                                                                                                    |
|--------|---------------------------------------------------------------------------------------------------------------|---------|-------|------|-----------------|----------------------------------------------------------------------------------------------------------------------------------------------------------------------------------------------------|
| P68040 | GBLP_MOUSE Guanine nucleotide-binding protein subunit beta-2-like 1<br>OS=Mus musculus<br>GN=Gnb211 PE=1 SV=3 | 1.6E-12 | 50.2  | 18.9 | 8 (8 0 0 0 0)   | Cell membrane;<br>Peripheral membrane protein.<br>Cytoplasm.<br>Cytoplasm â€°<br>perinuclear region.<br>Cytoplasm â€°<br>cytoskeleton.<br>Nucleus.<br>Perikaryon. Cell projection â€°<br>dendrite. |
| Q01514 | GBP1_MOUSE Interferon-induced guanylate-binding protein 1 OS=Mus musculus<br>GN=Gbp1 PE=1 SV=1                | 1.3E-08 | 30.2  | 7.3  | 4 (4 0 0 0 0)   | Cell membrane;<br>Lipid-anchor;<br>Cytoplasmic side.                                                                                                                                               |
| Q9Z0E6 | GBP2_MOUSE Interferon-induced guanylate-binding protein 2 OS=Mus musculus<br>GN=Gbp2 PE=1 SV=1                | 7.0E-10 | 40.3  | 9.0  | 6 (6 0 0 0 0)   | Cell membrane;<br>Lipid-anchor;<br>Cytoplasmic side.                                                                                                                                               |
| Q61598 | GDIB_MOUSE Rab GDP dissociation inhibitor beta OS=Mus musculus<br>GN=Gdi2 PE=1 SV=1                           | 2.6E-07 | 20.1  | 5.2  | 3 (3 0 0 0 0)   | Cytoplasm.<br>Membrane;<br>Peripheral membrane protein.                                                                                                                                            |
| Q99PT1 | GDIR1_MOUSE Rho GDP-dissociation inhibitor 1 OS=Mus musculus<br>GN=Arhgdia PE=1 SV=3                          | 4.2E-10 | 30.2  | 23.5 | 3 (3 0 0 0 0)   | Cytoplasm.                                                                                                                                                                                         |
| O08795 | GLU2B_MOUSE Glucosidase 2 subunit beta OS=Mus musculus<br>GN=Prkesh PE=1 SV=1                                 | 2.6E-09 | 50.2  | 10.0 | 8 (8 0 0 0 0)   | Endoplasmic reticulum.                                                                                                                                                                             |
| P50431 | GLYC_MOUSE Serine hydroxymethyltransferase, cytosolic OS=Mus musculus<br>GN=Shmt1 PE=1 SV=2                   | 4.1E-10 | 20.2  | 2.9  | 2 (2 0 0 0 0)   | Cytoplasm.                                                                                                                                                                                         |
| P21278 | GNA11_MOUSE Guanine nucleotide-binding protein subunit alpha-11 OS=Mus musculus<br>GN=Gna11 PE=1 SV=1         | 5.6E-15 | 130.3 | 43.7 | 18 (18 0 0 0 0) | Cell membrane;<br>Lipid-anchor.                                                                                                                                                                    |
| P27601 | GNA13_MOUSE Guanine nucleotide-binding protein subunit alpha-13 OS=Mus musculus<br>GN=Gna13 PE=1 SV=1         | 4.6E-11 | 110.2 | 26.5 | 21 (21 0 0 0 0) | Membrane; Lipid-anchor.<br>Melanosome.                                                                                                                                                             |
| P30677 | GNA14_MOUSE Guanine nucleotide-binding protein subunit alpha-14 OS=Mus musculus<br>GN=Gna14 PE=1 SV=1         | 4.1E-11 | 56.3  | 7.9  | 8 (5 3 0 0 0)   | ND                                                                                                                                                                                                 |
| P08752 | GNAI2_MOUSE Guanine nucleotide-binding protein G(i), alpha-2 subunit OS=Mus musculus                          | 1.2E-14 | 110.3 | 27.0 | 25 (25 0 0 0 0) | Cytoplasm.<br>Cytoplasm â€°<br>cytoskeleton â€°<br>centrosome. Cell                                                                                                                                |

*A novel role of mitochondria in muscle injury*

|        |                                                                                                                   |         |       |      |                 |                                                                                                                                                |
|--------|-------------------------------------------------------------------------------------------------------------------|---------|-------|------|-----------------|------------------------------------------------------------------------------------------------------------------------------------------------|
|        | GN=Gnai2 PE=1 SV=4                                                                                                |         |       |      |                 | membrane.                                                                                                                                      |
| Q9DC51 | GNAI3_MOUSE Guanine nucleotide-binding protein G(k) subunit alpha OS=Mus musculus GN=Gnai3 PE=1 SV=3              | 8.7E-13 | 50.2  | 18.9 | 9 (9 0 0 0 0)   | Cytoplasm. Cell membrane. Cytoplasmic centrosome.                                                                                              |
| P21279 | GNAQ_MOUSE Guanine nucleotide-binding protein G(q) subunit alpha OS=Mus musculus GN=Gnaq PE=1 SV=4                | 3.6E-14 | 70.3  | 25.1 | 10 (10 0 0 0 0) | ND                                                                                                                                             |
| Q6R0H7 | GNAS1_MOUSE Guanine nucleotide-binding protein G(s) subunit alpha isoforms XLas OS=Mus musculus GN=Gnas PE=2 SV=1 | 1.2E-08 | 80.2  | 5.9  | 13 (13 0 0 0 0) | Cell membrane; Peripheral membrane protein.                                                                                                    |
| P98192 | GNPAT_MOUSE Dihydroxyacetone phosphate acyltransferase OS=Mus musculus GN=Gnpat PE=2 SV=1                         | 2.5E-08 | 20.2  | 4.7  | 2 (2 0 0 0 0)   | Peroxisome membrane; Peripheral membrane protein; Matrix side.                                                                                 |
| Q9QYE6 | GOGA5_MOUSE Golgin subfamily A member 5 OS=Mus musculus GN=Golga5 PE=1 SV=2                                       | 4.4E-15 | 90.3  | 13.7 | 12 (12 0 0 0 0) | Golgi apparatus membrane; Single-pass type IV membrane protein.                                                                                |
| Q91W53 | GOGA7_MOUSE Golgin subfamily A member 7 OS=Mus musculus GN=Golga7 PE=2 SV=1                                       | 3.0E-11 | 20.2  | 19.0 | 2 (2 0 0 0 0)   | Golgi apparatus membrane; Lipid-anchor.                                                                                                        |
| Q8BXA1 | GOLI4_MOUSE Golgi integral membrane protein 4 OS=Mus musculus GN=Golim4 PE=1 SV=1                                 | 1.3E-08 | 80.3  | 15.7 | 15 (15 0 0 0 0) | Golgi apparatus membrane; Golgi stack membrane; Single-pass type II membrane protein. Endosome membrane; Single-pass type II membrane protein. |
| O88630 | GOSR1_MOUSE Golgi SNAP receptor complex member 1 OS=Mus musculus GN=Gosr1 PE=1 SV=1                               | 1.9E-11 | 30.3  | 15.2 | 4 (4 0 0 0 0)   | Golgi apparatus membrane; Single-pass type IV membrane protein.                                                                                |
| O35166 | GOSR2_MOUSE Golgi SNAP receptor complex member 2 OS=Mus musculus GN=Gosr2 PE=2 SV=2                               | 5.9E-08 | 30.2  | 12.7 | 3 (3 0 0 0 0)   | Golgi apparatus membrane; Single-pass type IV membrane protein.                                                                                |
| Q9QZF2 | GPC1_MOUSE Glypican-1 OS=Mus musculus GN=Gpc1 PE=1 SV=1                                                           | 1.0E-30 | 100.3 | 24.2 | 28 (28 0 0 0 0) | Cell membrane; Lipid-anchor; GPI-anchor; Extracellular side. Secreted.                                                                         |



|        |                                                                                                                        |         |       |      |                 |  |                                                                                                                       |
|--------|------------------------------------------------------------------------------------------------------------------------|---------|-------|------|-----------------|--|-----------------------------------------------------------------------------------------------------------------------|
|        |                                                                                                                        |         |       |      |                 |  | extracellular space.                                                                                                  |
| Q9R087 | GPC6_MOUSE Glypican-6<br>OS=Mus musculus<br>GN=Gpc6 PE=2 SV=1                                                          | 1.9E-11 | 20.2  | 4.5  | 4 (4 0 0 0 0)   |  | Cell membrane;<br>Lipid-anchor<br>GPI-anchor;<br>Extracellular side.<br>Secreted<br>extracellular space.              |
| Q64521 | GPDM_MOUSE Glycerol-3-phosphate dehydrogenase, mitochondrial<br>OS=Mus musculus<br>GN=Gpd2 PE=1 SV=2                   | 2.1E-13 | 110.3 | 13.1 | 12 (12 0 0 0 0) |  | Mitochondrion inner membrane.                                                                                         |
| Q9CXY9 | GPI8_MOUSE GPI-anchor transamidase<br>OS=Mus musculus<br>GN=Pigk PE=2 SV=2                                             | 1.0E-08 | 20.1  | 5.8  | 2 (2 0 0 0 0)   |  | Endoplasmic reticulum membrane; Single-pass type I membrane protein.                                                  |
| Q9D7B7 | GPX8_MOUSE Probable glutathione peroxidase 8<br>OS=Mus musculus<br>GN=Gpx8 PE=2 SV=1                                   | 2.5E-07 | 20.1  | 10.5 | 3 (3 0 0 0 0)   |  | Membrane; Single-pass membrane protein.                                                                               |
| P38647 | GRP75_MOUSE Stress-70 protein, mitochondrial<br>OS=Mus musculus<br>GN=Hspa9 PE=1 SV=2                                  | 1.0E-14 | 240.3 | 39.3 | 42 (42 0 0 0 0) |  | Mitochondrion.                                                                                                        |
| P20029 | GRP78_MOUSE 78 kDa glucose-regulated protein<br>OS=Mus musculus<br>GN=Hspa5 PE=1 SV=3                                  | 1.1E-15 | 420.3 | 49.3 | 99 (99 0 0 0 0) |  | Endoplasmic reticulum lumen.<br>Melanosome.                                                                           |
| Q61543 | GSLG1_MOUSE Golgi apparatus protein 1<br>OS=Mus musculus<br>GN=Glg1 PE=1 SV=1                                          | 1.1E-15 | 100.3 | 8.2  | 18 (18 0 0 0 0) |  | Cell membrane; Single-pass type I membrane protein.<br>Golgi apparatus membrane; Single-pass type I membrane protein. |
| P17809 | GTR1_MOUSE Solute carrier family 2, facilitated glucose transporter member 1<br>OS=Mus musculus<br>GN=Slc2a1 PE=1 SV=3 | 3.0E-07 | 40.2  | 5.7  | 9 (9 0 0 0 0)   |  | Cell membrane; Multi-pass membrane protein.<br>Melanosome.                                                            |
| Q80SU7 | GVIN1_MOUSE Interferon-induced very large GTPase 1<br>OS=Mus musculus<br>GN=Gvin1 PE=1 SV=1                            | 1.0E-13 | 220.3 | 10.8 | 26 (26 0 0 0 0) |  | Cytoplasm<br>cytosol. Nucleus.                                                                                        |
| Q8CGP5 | H2A1F_MOUSE Histone H2A type 1-F<br>OS=Mus musculus<br>GN=Hist1h2af PE=1 SV=3                                          | 3.0E-14 | 50.3  | 35.4 | 25 (25 0 0 0 0) |  | Nucleus.<br>Chromosome.                                                                                               |
| P70696 | H2B1A_MOUSE Histone H2B type 1-A<br>OS=Mus musculus<br>GN=Hist1h2ba PE=2 SV=3                                          | 4.6E-11 | 40.2  | 36.2 | 6 (6 0 0 0 0)   |  | Nucleus.<br>Chromosome.                                                                                               |

*A novel role of mitochondria in muscle injury*

|        |                                                                                                         |         |       |      |                 |                                                |
|--------|---------------------------------------------------------------------------------------------------------|---------|-------|------|-----------------|------------------------------------------------|
| Q64475 | H2B1B_MOUSE Histone H2B type 1-B OS=Mus musculus GN=Hist1h2bb PE=1 SV=3                                 | 2.2E-11 | 76.2  | 21.4 | 10 (8 2 0 0 0)  | Nucleus. Chromosome.                           |
| P68433 | H31_MOUSE Histone H3.1 OS=Mus musculus GN=Hist1h3a PE=1 SV=2                                            | 3.8E-09 | 60.2  | 27.2 | 8 (8 0 0 0 0)   | Nucleus. Chromosome.                           |
| P62806 | H4_MOUSE Histone H4 OS=Mus musculus GN=Hist1h4a PE=1 SV=2                                               | 1.5E-07 | 30.2  | 31.1 | 6 (6 0 0 0 0)   | Nucleus. Chromosome.                           |
| P62806 | H4_MOUSE Histone H4 OS=Mus musculus GN=Hist1h4a PE=1 SV=2                                               | 7.1E-09 | 110.2 | 60.2 | 12 (12 0 0 0 0) | Nucleus. Chromosome.                           |
| P01898 | HA10_MOUSE H-2 class I histocompatibility antigen, Q10 alpha chain OS=Mus musculus GN=H2-Q10 PE=1 SV=3  | 4.4E-11 | 70.2  | 20.9 | 21 (21 0 0 0 0) | Membrane; Single-pass type I membrane protein. |
| P01899 | HA11_MOUSE H-2 class I histocompatibility antigen, D-B alpha chain OS=Mus musculus GN=H2-D1 PE=1 SV=2   | 6.5E-12 | 160.2 | 36.5 | 61 (61 0 0 0 0) | Membrane; Single-pass type I membrane protein. |
| P01900 | HA12_MOUSE H-2 class I histocompatibility antigen, D-D alpha chain OS=Mus musculus GN=H2-D1 PE=1 SV=1   | 1.8E-05 | 20.2  | 5.5  | 3 (3 0 0 0 0)   | Membrane; Single-pass type I membrane protein. |
| P14426 | HA13_MOUSE H-2 class I histocompatibility antigen, D-K alpha chain OS=Mus musculus GN=H2-D1 PE=1 SV=1   | 1.0E-09 | 48.2  | 10.8 | 12 (11 1 0 0 0) | Membrane; Single-pass type I membrane protein. |
| P06339 | HA15_MOUSE H-2 class I histocompatibility antigen, D-37 alpha chain OS=Mus musculus GN=H2-T23 PE=1 SV=1 | 5.1E-05 | 20.2  | 3.6  | 3 (3 0 0 0 0)   | Membrane; Single-pass type I membrane protein. |
| P14429 | HA17_MOUSE H-2 class I histocompatibility antigen, Q7 alpha chain OS=Mus musculus GN=H2-Q7 PE=1 SV=1    | 7.8E-10 | 50.2  | 11.1 | 5 (5 0 0 0 0)   | Membrane; Single-pass type I membrane protein. |
| P01901 | HA1B_MOUSE H-2 class I histocompatibility antigen, K-B alpha chain OS=Mus musculus GN=H2-K1 PE=1 SV=1   | 2.4E-14 | 100.3 | 16.0 | 36 (36 0 0 0 0) | Membrane; Single-pass type I membrane protein. |
| P01902 | HA1D_MOUSE H-2 class I histocompatibility antigen, K-D alpha chain OS=Mus musculus GN=H2-K1 PE=1 SV=1   | 6.7E-08 | 16.2  | 4.9  | 3 (0 3 0 0 0)   | Membrane; Single-pass type I membrane protein. |

|        |                                                                                                        |         |       |      |                 |                                                                                                          |
|--------|--------------------------------------------------------------------------------------------------------|---------|-------|------|-----------------|----------------------------------------------------------------------------------------------------------|
| P14434 | HA2B_MOUSE H-2 class II histocompatibility antigen, A-B alpha chain OS=Mus musculus GN=H2-Aa PE=1 SV=2 | 3.9E-11 | 20.2  | 10.5 | 2 (2 0 0 0 0)   | Membrane; Single-pass type I membrane protein.                                                           |
| P14483 | HB2A_MOUSE H-2 class II histocompatibility antigen, A beta chain OS=Mus musculus GN=H2-Ab1 PE=1 SV=1   | 3.7E-11 | 50.2  | 27.2 | 9 (9 0 0 0 0)   | Membrane; Single-pass type I membrane protein.                                                           |
| O08756 | HCD2_MOUSE 3-hydroxyacyl-CoA dehydrogenase type-2 OS=Mus musculus GN=Hsd17b10 PE=1 SV=4                | 8.5E-11 | 40.2  | 27.2 | 5 (5 0 0 0 0)   | Mitochondrion.                                                                                           |
| Q9D8V0 | HM13_MOUSE Minor histocompatibility antigen H13 OS=Mus musculus GN=Hm13 PE=1 SV=1                      | 1.0E-30 | 40.3  | 8.2  | 5 (5 0 0 0 0)   | Endoplasmic reticulum membrane; Multi-pass membrane protein. Cell membrane; Multi-pass membrane protein. |
| P14901 | HMOX1_MOUSE Heme oxygenase 1 OS=Mus musculus GN=Hmox1 PE=2 SV=1                                        | 4.2E-09 | 60.3  | 14.5 | 6 (6 0 0 0 0)   | Microsome. Endoplasmic reticulum.                                                                        |
| O70252 | HMOX2_MOUSE Heme oxygenase 2 OS=Mus musculus GN=Hmox2 PE=2 SV=1                                        | 2.2E-14 | 120.3 | 40.3 | 13 (13 0 0 0 0) | Microsome. Endoplasmic reticulum.                                                                        |
| O35737 | HNRH1_MOUSE Heterogeneous nuclear ribonucleoprotein H OS=Mus musculus GN=Hnrph1 PE=1 SV=3              | 3.2E-09 | 30.2  | 11.1 | 4 (4 0 0 0 0)   | Nucleus <sup>o</sup> nucleoplasm.                                                                        |
| Q9Z2X1 | HNRPF_MOUSE Heterogeneous nuclear ribonucleoprotein F OS=Mus musculus GN=Hnrpf PE=1 SV=3               | 4.3E-09 | 20.3  | 9.2  | 2 (2 0 0 0 0)   | Nucleus <sup>o</sup> nucleoplasm.                                                                        |
| P61979 | HNRPK_MOUSE Heterogeneous nuclear ribonucleoprotein K OS=Mus musculus GN=Hnrpk PE=1 SV=1               | 2.1E-10 | 90.3  | 28.1 | 11 (11 0 0 0 0) | Cytoplasm. Nucleus <sup>o</sup> nucleoplasm.                                                             |
| Q9D0E1 | HNRPM_MOUSE Heterogeneous nuclear ribonucleoprotein M OS=Mus musculus GN=Hnrpm PE=1 SV=3               | 4.6E-13 | 240.3 | 27.2 | 37 (37 0 0 0 0) | Nucleus.                                                                                                 |
| Q7TMK9 | HNRPQ_MOUSE Heterogeneous nuclear ribonucleoprotein Q OS=Mus musculus                                  | 1.6E-10 | 30.2  | 6.7  | 3 (3 0 0 0 0)   | Nucleus. Cytoplasm.                                                                                      |

*A novel role of mitochondria in muscle injury*

|        |                                                                                                            |         |       |      |                  |                                                                         |
|--------|------------------------------------------------------------------------------------------------------------|---------|-------|------|------------------|-------------------------------------------------------------------------|
|        | GN=Syncrip PE=1 SV=2                                                                                       |         |       |      |                  |                                                                         |
| Q8VEK3 | HNRPU_MOUSE Heterogeneous nuclear ribonucleoprotein U OS=Mus musculus GN=Hnrnpu PE=1 SV=1                  | 1.0E-09 | 50.2  | 5.6  | 5 (5 0 0 0 0)    | Nucleus. Cytoplasm. Cell surface.                                       |
| Q8R3H7 | HS2ST_MOUSE Heparan sulfate 2-O-sulfotransferase 1 OS=Mus musculus GN=Hs2st1 PE=1 SV=2                     | 1.1E-06 | 20.1  | 5.9  | 2 (2 0 0 0 0)    | Golgi apparatus membrane; Single-pass type II membrane protein.         |
| Q61696 | HS71A_MOUSE Heat shock 70 kDa protein 1A OS=Mus musculus GN=Hspa1a PE=1 SV=2                               | 1.5E-13 | 30.3  | 7.2  | 7 (7 0 0 0 0)    | Cytoplasm.                                                              |
| P07901 | HS90A_MOUSE Heat shock protein HSP 90-alpha OS=Mus musculus GN=Hsp90aa1 PE=1 SV=4                          | 1.2E-12 | 244.3 | 30.3 | 53 (38 15 0 0 0) | Cytoplasm. Melanosome.                                                  |
| P11499 | HS90B_MOUSE Heat shock protein HSP 90-beta OS=Mus musculus GN=Hsp90ab1 PE=1 SV=2                           | 3.9E-12 | 108.3 | 16.9 | 31 (30 1 0 0 0)  | Cytoplasm. Melanosome.                                                  |
| P17156 | HSP72_MOUSE Heat shock-related 70 kDa protein 2 OS=Mus musculus GN=Hspa2 PE=1 SV=1                         | 1.8E-13 | 50.2  | 8.5  | 16 (16 0 0 0 0)  | ND                                                                      |
| Q61316 | HSP74_MOUSE Heat shock 70 kDa protein 4 OS=Mus musculus GN=Hspa4 PE=1 SV=1                                 | 4.4E-08 | 20.2  | 3.8  | 3 (3 0 0 0 0)    | Cytoplasm.                                                              |
| P63017 | HSP7C_MOUSE Heat shock cognate 71 kDa protein OS=Mus musculus GN=Hspa8 PE=1 SV=1                           | 3.3E-15 | 240.3 | 27.9 | 63 (63 0 0 0 0)  | Cytoplasm. Melanosome.                                                  |
| P14602 | HSPB1_MOUSE Heat shock protein beta-1 OS=Mus musculus GN=Hspb1 PE=1 SV=3                                   | 4.9E-06 | 30.1  | 20.6 | 3 (3 0 0 0 0)    | Cytoplasm. Nucleus. Cytoplasm $\hat{c}$ cytoskeleton $\hat{c}$ spindle. |
| O08528 | HXK2_MOUSE Hexokinase-2 OS=Mus musculus GN=Hk2 PE=1 SV=1                                                   | 2.1E-06 | 30.2  | 4.7  | 3 (3 0 0 0 0)    | ND                                                                      |
| Q9JKR6 | HYOU1_MOUSE Hypoxia up-regulated protein 1 OS=Mus musculus GN=Hyou1 PE=1 SV=1                              | 2.2E-15 | 230.3 | 28.1 | 30 (30 0 0 0 0)  | Endoplasmic reticulum lumen.                                            |
| Q9D6R2 | IDH3A_MOUSE Isocitrate dehydrogenase [NAD] subunit alpha, mitochondrial OS=Mus musculus GN=Idh3a PE=1 SV=1 | 1.3E-10 | 100.2 | 31.1 | 12 (12 0 0 0 0)  | Mitochondrion.                                                          |

*A novel role of mitochondria in muscle injury*

|        |                                                                                                     |         |       |      |                 |                                                                                                                                                                                                                             |
|--------|-----------------------------------------------------------------------------------------------------|---------|-------|------|-----------------|-----------------------------------------------------------------------------------------------------------------------------------------------------------------------------------------------------------------------------|
| P54071 | IDHP_MOUSE Isocitrate dehydrogenase [NADP], mitochondrial OS=Mus musculus GN=Idh2 PE=1 SV=3         | 2.0E-09 | 90.2  | 22.6 | 9 (9 0 0 0 0)   | Mitochondrion.                                                                                                                                                                                                              |
| Q6ZWX6 | IF2A_MOUSE Eukaryotic translation initiation factor 2 subunit 1 OS=Mus musculus GN=Eif2s1 PE=1 SV=3 | 9.4E-08 | 20.2  | 8.6  | 2 (2 0 0 0 0)   | Cytoplasmic granule.                                                                                                                                                                                                        |
| P60843 | IF4A1_MOUSE Eukaryotic initiation factor 4A-1 OS=Mus musculus GN=Eif4a1 PE=2 SV=1                   | 1.9E-11 | 140.3 | 29.1 | 17 (17 0 0 0 0) | ND                                                                                                                                                                                                                          |
| P63242 | IF5A1_MOUSE Eukaryotic translation initiation factor 5A-1 OS=Mus musculus GN=Eif5a PE=1 SV=2        | 6.9E-11 | 20.1  | 15.6 | 3 (3 0 0 0 0)   | Cytoplasm. Nucleus. Endoplasmic reticulum membrane; Peripheral membrane protein; Cytoplasmic side. Nucleus nuclear pore complex.                                                                                            |
| P03975 | IGEB_MOUSE IgE-binding protein OS=Mus musculus GN=Iap PE=2 SV=1                                     | 3.2E-11 | 20.2  | 4.8  | 2 (2 0 0 0 0)   | ND                                                                                                                                                                                                                          |
| Q60751 | IGF1R_MOUSE Insulin-like growth factor 1 receptor OS=Mus musculus GN=Igf1r PE=1 SV=3                | 1.7E-08 | 80.2  | 7.5  | 12 (12 0 0 0 0) | Membrane; Single-pass type I membrane protein.                                                                                                                                                                              |
| Q8R366 | IGSF8_MOUSE Immunoglobulin superfamily member 8 OS=Mus musculus GN=Igsf8 PE=1 SV=2                  | 2.8E-08 | 90.2  | 18.5 | 10 (10 0 0 0 0) | Membrane; Single-pass membrane protein.                                                                                                                                                                                     |
| Q9QZ85 | IIGP1_MOUSE Interferon-inducible GTPase 1 OS=Mus musculus GN=Iigp1 PE=1 SV=2                        | 1.0E-30 | 230.3 | 55.4 | 39 (39 0 0 0 0) | Cytoplasm. Nucleus membrane; Peripheral membrane protein. Endoplasmic reticulum membrane; Peripheral membrane protein. Golgi apparatus Golgi stack membrane; Peripheral membrane protein. Parasitophorous vacuole membrane. |

|        |                                                                                                             |         |       |      |                 |                                                                                               |
|--------|-------------------------------------------------------------------------------------------------------------|---------|-------|------|-----------------|-----------------------------------------------------------------------------------------------|
| Q9DBZ1 | IKIP_MOUSE Inhibitor of nuclear factor kappa-B kinase-interacting protein OS=Mus musculus GN=Ikip PE=1 SV=2 | 7.8E-10 | 70.2  | 21.4 | 10 (10 0 0 0 0) | Endoplasmic reticulum membrane; Single-pass membrane protein.                                 |
| O55222 | ILK_MOUSE Integrin-linked protein kinase OS=Mus musculus GN=Ilk PE=1 SV=2                                   | 6.4E-08 | 60.2  | 15.7 | 6 (6 0 0 0 0)   | Cell junction ° focal adhesion. Cell membrane; Peripheral membrane protein; Cytoplasmic side. |
| Q8BU33 | ILVBL_MOUSE Acetolactate synthase-like protein OS=Mus musculus GN=Ilvbl PE=2 SV=1                           | 6.7E-15 | 30.3  | 8.5  | 5 (5 0 0 0 0)   | Membrane; Single-pass membrane protein.                                                       |
| P52293 | IMA2_MOUSE Importin subunit alpha-2 OS=Mus musculus GN=Kpna2 PE=1 SV=2                                      | 3.5E-09 | 50.2  | 14.0 | 5 (5 0 0 0 0)   | Cytoplasm. Nucleus.                                                                           |
| P70168 | IMB1_MOUSE Importin subunit beta-1 OS=Mus musculus GN=Kpnb1 PE=1 SV=1                                       | 1.6E-10 | 160.3 | 20.0 | 18 (18 0 0 0 0) | Cytoplasm. Nucleus envelope.                                                                  |
| P24547 | IMDH2_MOUSE Inosine-5'-monophosphate dehydrogenase 2 OS=Mus musculus GN=Impdh2 PE=1 SV=2                    | 4.3E-09 | 20.2  | 4.5  | 2 (2 0 0 0 0)   | Cytoplasm. Nucleus.                                                                           |
| Q8CAQ8 | IMMT_MOUSE Mitochondrial inner membrane protein OS=Mus musculus GN=Immt PE=1 SV=1                           | 1.3E-13 | 360.3 | 43.5 | 54 (54 0 0 0 0) | Mitochondrion inner membrane.                                                                 |
| Q80V26 | IMPA3_MOUSE Inositol monophosphatase 3 OS=Mus musculus GN=Impad1 PE=2 SV=1                                  | 8.7E-06 | 50.2  | 12.6 | 5 (5 0 0 0 0)   | Membrane; Single-pass membrane protein.                                                       |
| Q0GNC1 | INF2_MOUSE Inverted formin-2 OS=Mus musculus GN=Inf2 PE=1 SV=1                                              | 1.0E-06 | 20.1  | 1.6  | 2 (2 0 0 0 0)   | Cytoplasm ° perinuclear region.                                                               |
| Q3TAS6 | INM02_MOUSE UPF0510 protein INM02 OS=Mus musculus GN=Inm02 PE=2 SV=2                                        | 5.2E-14 | 20.2  | 9.7  | 3 (3 0 0 0 0)   | Membrane; Single-pass type I membrane protein. Secreted.                                      |
| Q8VI75 | IPO4_MOUSE Importin-4 OS=Mus musculus GN=Ipo4 PE=1 SV=1                                                     | 1.5E-07 | 20.1  | 2.6  | 3 (3 0 0 0 0)   | Cytoplasm. Nucleus.                                                                           |
| Q8BKC5 | IPO5_MOUSE Importin-5 OS=Mus musculus GN=Ipo5 PE=1 SV=3                                                     | 9.7E-11 | 80.2  | 8.3  | 8 (8 0 0 0 0)   | Cytoplasm. Nucleus.                                                                           |
| Q8BKC5 | IPO5_MOUSE Importin-5 OS=Mus musculus GN=Ipo5 PE=1 SV=3                                                     | 4.3E-13 | 30.3  | 4.6  | 4 (4 0 0 0 0)   | Cytoplasm. Nucleus.                                                                           |
| Q9EPL8 | IPO7_MOUSE Importin-7 OS=Mus musculus GN=Ipo7                                                               | 7.8E-08 | 20.1  | 2.3  | 2 (2 0 0 0 0)   | Cytoplasm. Nucleus.                                                                           |

|        |                                                                                                                |         |       |      |                 |                                                                                                                                                                                                                                                            |
|--------|----------------------------------------------------------------------------------------------------------------|---------|-------|------|-----------------|------------------------------------------------------------------------------------------------------------------------------------------------------------------------------------------------------------------------------------------------------------|
|        | PE=1 SV=2                                                                                                      |         |       |      |                 |                                                                                                                                                                                                                                                            |
| Q9JKF1 | IQGA1_MOUSE Ras GTPase-activating-like protein IQGAP1 OS=Mus musculus GN=Iqgap1 PE=1 SV=1                      | 1.4E-14 | 220.3 | 16.1 | 25 (25 0 0 0 0) | Cell membrane.                                                                                                                                                                                                                                             |
| Q60766 | IRGM_MOUSE Immunity-related GTPase family M protein OS=Mus musculus GN=Irgm PE=1 SV=1                          | 1.0E-30 | 164.3 | 35.0 | 37 (35 1 1 0 0) | Golgi apparatus membrane. Cell membrane. Cytoplasmic vesicle $\hat{\epsilon}$ phagosome membrane. Cytoplasmic vesicle $\hat{\epsilon}$ autophagosome membrane. Lysosome membrane. Late endosome membrane. Cell projection $\hat{\epsilon}$ phagocytic cup. |
| Q6GU68 | ISLR_MOUSE Immunoglobulin superfamily containing leucine-rich repeat protein OS=Mus musculus GN=Islr PE=1 SV=1 | 3.5E-11 | 60.2  | 11.7 | 14 (14 0 0 0 0) | Secreted.                                                                                                                                                                                                                                                  |
| Q62470 | ITA3_MOUSE Integrin alpha-3 OS=Mus musculus GN=Itga3 PE=1 SV=1                                                 | 1.6E-12 | 80.2  | 9.4  | 10 (10 0 0 0 0) | Membrane; Single-pass type I membrane protein.                                                                                                                                                                                                             |
| P11688 | ITA5_MOUSE Integrin alpha-5 OS=Mus musculus GN=Itga5 PE=1 SV=2                                                 | 4.2E-11 | 180.3 | 17.9 | 30 (30 0 0 0 0) | Membrane; Single-pass type I membrane protein.                                                                                                                                                                                                             |
| Q61739 | ITA6_MOUSE Integrin alpha-6 OS=Mus musculus GN=Itga6 PE=1 SV=2                                                 | 4.0E-14 | 120.3 | 14.6 | 17 (17 0 0 0 0) | Membrane; Single-pass type I membrane protein.                                                                                                                                                                                                             |
| Q61738 | ITA7_MOUSE Integrin alpha-7 OS=Mus musculus GN=Itga7 PE=1 SV=2                                                 | 6.0E-14 | 180.3 | 16.0 | 47 (47 0 0 0 0) | Membrane; Single-pass type I membrane protein.                                                                                                                                                                                                             |
| P43406 | ITAV_MOUSE Integrin alpha-V OS=Mus musculus GN=Itgav PE=1 SV=1                                                 | 5.6E-11 | 110.2 | 11.6 | 13 (13 0 0 0 0) | Membrane; Single-pass type I membrane protein.                                                                                                                                                                                                             |
| P09055 | ITB1_MOUSE Integrin beta-1 OS=Mus musculus GN=Itgb1 PE=1 SV=1                                                  | 1.8E-12 | 148.3 | 15.2 | 85 (82 3 0 0 0) | Cell membrane; Single-pass type I membrane protein. Melanosome.                                                                                                                                                                                            |
| O54890 | ITB3_MOUSE Integrin beta-3 OS=Mus musculus GN=Itgb3 PE=2 SV=1                                                  | 7.0E-09 | 20.2  | 3.3  | 3 (3 0 0 0 0)   | Membrane; Single-pass type I membrane protein.                                                                                                                                                                                                             |
| Q8C0Z1 | ITFG3_MOUSE Protein ITFG3 OS=Mus musculus GN=Itfg3 PE=1 SV=1                                                   | 7.5E-07 | 30.2  | 6.5  | 4 (4 0 0 0 0)   | Membrane; Single-pass type II membrane protein.                                                                                                                                                                                                            |

|        |                                                                                                  |         |       |      |                 |                                                                                                                                                                                          |
|--------|--------------------------------------------------------------------------------------------------|---------|-------|------|-----------------|------------------------------------------------------------------------------------------------------------------------------------------------------------------------------------------|
| Q5XKN4 | JAGN1_MOUSE Protein jagunal homolog 1 OS=Mus musculus GN=Jagn1 PE=2 SV=2                         | 4.1E-08 | 20.2  | 13.1 | 2 (2 0 0 0 0)   | Endoplasmic reticulum membrane; Multi-pass membrane protein.                                                                                                                             |
| P52332 | JAK1_MOUSE Tyrosine-protein kinase JAK1 OS=Mus musculus GN=Jak1 PE=1 SV=1                        | 6.9E-13 | 60.2  | 5.1  | 6 (6 0 0 0 0)   | Endomembrane system; Peripheral membrane protein.                                                                                                                                        |
| Q9D8B7 | JAM3_MOUSE Junctional adhesion molecule C OS=Mus musculus GN=Jam3 PE=1 SV=2                      | 2.4E-10 | 20.2  | 8.4  | 4 (4 0 0 0 0)   | Cell membrane; Single-pass type I membrane protein. Cell junction $\hat{\epsilon}^{\circ}$ desmosome. Secreted $\hat{\epsilon}^{\circ}$ extracellular space.                             |
| Q9ET78 | JPH2_MOUSE Junctophilin-2 OS=Mus musculus GN=Jph2 PE=1 SV=2                                      | 1.0E-07 | 20.2  | 4.5  | 2 (2 0 0 0 0)   | Cell membrane; Peripheral membrane protein. Endoplasmic reticulum membrane; Single-pass type IV membrane protein. Sarcoplasmic reticulum membrane; Single-pass type IV membrane protein. |
| Q8C7X2 | K0090_MOUSE Uncharacterized protein KIAA0090 OS=Mus musculus GN=Kiaa0090 PE=1 SV=1               | 2.9E-14 | 120.3 | 19.4 | 14 (14 0 0 0 0) | Membrane; Single-pass type I membrane protein.                                                                                                                                           |
| Q8C7X2 | K0090_MOUSE Uncharacterized protein KIAA0090 OS=Mus musculus GN=Kiaa0090 PE=1 SV=1               | 1.3E-13 | 100.2 | 15.6 | 14 (14 0 0 0 0) | Membrane; Single-pass type I membrane protein.                                                                                                                                           |
| Q69ZQ1 | K1161_MOUSE Uncharacterized family 31 glucosidase KIAA1161 OS=Mus musculus GN=Kiaa1161 PE=1 SV=2 | 2.6E-07 | 20.1  | 2.8  | 2 (2 0 0 0 0)   | Membrane; Single-pass type II membrane protein.                                                                                                                                          |
| P02535 | K1C10_MOUSE Keratin, type I cytoskeletal 10 OS=Mus musculus GN=Krt10 PE=1 SV=3                   | 9.9E-09 | 50.2  | 5.3  | 27 (27 0 0 0 0) | ND                                                                                                                                                                                       |
| P04104 | K2C1_MOUSE Keratin, type II cytoskeletal 1 OS=Mus musculus GN=Krt1 PE=1 SV=4                     | 2.7E-06 | 18.1  | 3.6  | 4 (3 1 0 0 0)   | Cell membrane.                                                                                                                                                                           |
| Q6IFZ6 | K2C1B_MOUSE Keratin, type II cytoskeletal 1b OS=Mus musculus                                     | 8.3E-09 | 20.2  | 3.8  | 20 (20 0 0 0 0) | ND                                                                                                                                                                                       |



|        |                                                                                                                              |         |      |      |               |                                                                                                                                                                            |
|--------|------------------------------------------------------------------------------------------------------------------------------|---------|------|------|---------------|----------------------------------------------------------------------------------------------------------------------------------------------------------------------------|
|        | GN=Krt77 PE=1 SV=1                                                                                                           |         |      |      |               |                                                                                                                                                                            |
| P11679 | K2C8_MOUSE Keratin, type II cytoskeletal 8 OS=Mus musculus GN=Krt8 PE=1 SV=4                                                 | 3.7E-12 | 30.2 | 2.9  | 6 (6 0 0 0 0) | Cytoplasm. Nucleus $\hat{e}^{\circ}$ nucleoplasm. Nucleus matrix.                                                                                                          |
| Q9R0Y5 | KAD1_MOUSE Adenylate kinase isoenzyme 1 OS=Mus musculus GN=Ak1 PE=1 SV=1                                                     | 1.3E-08 | 30.2 | 18.6 | 4 (4 0 0 0 0) | Cytoplasm.                                                                                                                                                                 |
| Q8BX02 | KANK2_MOUSE KN motif and ankyrin repeat domain-containing protein 2 OS=Mus musculus GN=Kank2 PE=1 SV=1                       | 1.5E-13 | 50.2 | 8.5  | 5 (5 0 0 0 0) | ND                                                                                                                                                                         |
| P31324 | KAP3_MOUSE cAMP-dependent protein kinase type II-beta regulatory subunit OS=Mus musculus GN=Prkar2b PE=1 SV=3                | 3.0E-06 | 20.2 | 7.9  | 2 (2 0 0 0 0) | Cytoplasm. Cell membrane.                                                                                                                                                  |
| P11798 | KCC2A_MOUSE Calcium/calmodulin-dependent protein kinase type II alpha chain OS=Mus musculus GN=Camk2a PE=1 SV=2              | 4.7E-12 | 30.2 | 6.5  | 4 (4 0 0 0 0) | Cytoplasm. Cell junction $\hat{e}^{\circ}$ synapse $\hat{e}^{\circ}$ presynaptic cell membrane. Cell junction $\hat{e}^{\circ}$ synapse.                                   |
| Q6PHZ2 | KCC2D_MOUSE Calcium/calmodulin-dependent protein kinase type II delta chain OS=Mus musculus GN=Camk2d PE=1 SV=1              | 2.7E-11 | 30.2 | 7.0  | 5 (5 0 0 0 0) | Cell membrane $\hat{e}^{\circ}$ sarcolemma; Peripheral membrane protein; Cytoplasmic side. Sarcoplasmic reticulum membrane; Peripheral membrane protein; Cytoplasmic side. |
| Q60749 | KHDR1_MOUSE KH domain-containing, RNA-binding, signal transduction-associated protein 1 OS=Mus musculus GN=Khdrbs1 PE=1 SV=2 | 1.1E-07 | 20.2 | 5.4  | 2 (2 0 0 0 0) | Nucleus. Membrane.                                                                                                                                                         |
| P33175 | KIF5A_MOUSE Kinesin heavy chain isoform 5A OS=Mus musculus GN=Kif5a PE=1 SV=3                                                | 1.6E-06 | 50.2 | 4.6  | 5 (5 0 0 0 0) | Cytoplasm $\hat{e}^{\circ}$ perinuclear region. Cytoplasm $\hat{e}^{\circ}$ cytoskeleton.                                                                                  |
| Q61768 | KINH_MOUSE Kinesin-1 heavy chain OS=Mus musculus GN=Kif5b PE=1 SV=2                                                          | 3.4E-06 | 40.2 | 5.4  | 4 (4 0 0 0 0) | Cytoplasm $\hat{e}^{\circ}$ cytoskeleton.                                                                                                                                  |
| Q80W68 | KIRR1_MOUSE Kin of IRRE-like protein 1 OS=Mus                                                                                | 8.0E-10 | 20.2 | 4.2  | 3 (3 0 0 0 0) | Cell membrane; Single-pass type I                                                                                                                                          |

|        |                                                                                                                  |         |       |      |                 |                                                                                                                                                 |
|--------|------------------------------------------------------------------------------------------------------------------|---------|-------|------|-----------------|-------------------------------------------------------------------------------------------------------------------------------------------------|
|        | musculus GN=Kirrel PE=1 SV=1                                                                                     |         |       |      |                 | membrane protein.                                                                                                                               |
| P52480 | KPYM_MOUSE Pyruvate kinase isozymes M1/M2 OS=Mus musculus GN=Pkm2 PE=1 SV=4                                      | 1.0E-30 | 230.3 | 45.4 | 42 (42 0 0 0 0) | Cytoplasm. Nucleus.                                                                                                                             |
| Q61595 | KTN1_MOUSE Kinectin OS=Mus musculus GN=Ktn1 PE=1 SV=1                                                            | 1.0E-30 | 340.3 | 30.4 | 52 (52 0 0 0 0) | Endoplasmic reticulum membrane; Single-pass type II membrane protein.                                                                           |
| P02469 | LAMB1_MOUSE Laminin subunit beta-1 OS=Mus musculus GN=Lamb1-1 PE=1 SV=2                                          | 1.1E-10 | 80.2  | 5.9  | 10 (10 0 0 0 0) | Secreted $\hat{\epsilon}^{\circ}$ extracellular space $\hat{\epsilon}^{\circ}$ extracellular matrix $\hat{\epsilon}^{\circ}$ basement membrane. |
| P02468 | LAMC1_MOUSE Laminin subunit gamma-1 OS=Mus musculus GN=Lamc1 PE=1 SV=2                                           | 6.5E-10 | 40.2  | 3.3  | 6 (6 0 0 0 0)   | Secreted $\hat{\epsilon}^{\circ}$ extracellular space $\hat{\epsilon}^{\circ}$ extracellular matrix $\hat{\epsilon}^{\circ}$ basement membrane. |
| Q80TH2 | LAP2_MOUSE Protein LAP2 OS=Mus musculus GN=Erb2ip PE=1 SV=2                                                      | 2.3E-09 | 50.3  | 5.1  | 9 (9 0 0 0 0)   | Cell junction $\hat{\epsilon}^{\circ}$ hemidesmosome.                                                                                           |
| Q61029 | LAP2B_MOUSE Lamina-associated polypeptide 2, isoforms beta/delta/epsilon/gamma OS=Mus musculus GN=Tmpo PE=1 SV=3 | 3.5E-13 | 20.2  | 5.8  | 2 (2 0 0 0 0)   | Nucleus inner membrane; Single-pass type II membrane protein. Chromosome.                                                                       |
| Q924Z4 | LASS2_MOUSE LAG1 longevity assurance homolog 2 OS=Mus musculus GN=Lass2 PE=1 SV=1                                | 1.1E-15 | 20.3  | 4.7  | 2 (2 0 0 0 0)   | Nucleus membrane; Multi-pass membrane protein. Endoplasmic reticulum membrane; Multi-pass membrane protein.                                     |
| Q8C172 | LASS6_MOUSE LAG1 longevity assurance homolog 6 OS=Mus musculus GN=Lass6 PE=1 SV=1                                | 7.4E-05 | 20.1  | 2.9  | 2 (2 0 0 0 0)   | Nucleus membrane; Multi-pass membrane protein. Endoplasmic reticulum membrane; Multi-pass membrane protein.                                     |
| Q9Z127 | LAT1_MOUSE Large neutral amino acids transporter small subunit 1 OS=Mus musculus                                 | 3.8E-11 | 60.2  | 8.6  | 13 (13 0 0 0 0) | Cytoplasm $\hat{\epsilon}^{\circ}$ cytosol. Apical cell membrane; Multi-pass membrane                                                           |

|        |                                                                                                             |         |       |      |                 |                                                                                                                                                                                  |
|--------|-------------------------------------------------------------------------------------------------------------|---------|-------|------|-----------------|----------------------------------------------------------------------------------------------------------------------------------------------------------------------------------|
|        | GN=Slc7a5 PE=1 SV=1                                                                                         |         |       |      |                 | protein.                                                                                                                                                                         |
| Q8C129 | LCAP_MOUSE Leucyl-cystinyl aminopeptidase OS=Mus musculus GN=Lnpep PE=1 SV=1                                | 1.2E-09 | 170.3 | 16.2 | 20 (20 0 0 0 0) | Cell membrane; Single-pass type II membrane protein. Endomembrane system; Single-pass type II membrane protein.                                                                  |
| Q3UN02 | LCLT1_MOUSE Lysocardiolipin acyltransferase 1 OS=Mus musculus GN=Lclat1 PE=2 SV=2                           | 3.1E-06 | 30.1  | 8.8  | 3 (3 0 0 0 0)   | Endoplasmic reticulum membrane; Multi-pass membrane protein.                                                                                                                     |
| P06151 | LDHA_MOUSE L-lactate dehydrogenase A chain OS=Mus musculus GN=Ldha PE=1 SV=3                                | 2.3E-07 | 30.1  | 9.0  | 3 (3 0 0 0 0)   | Cytoplasm.                                                                                                                                                                       |
| P35951 | LDLR_MOUSE Low-density lipoprotein receptor OS=Mus musculus GN=Ldlr PE=1 SV=1                               | 4.1E-12 | 60.3  | 10.6 | 7 (7 0 0 0 0)   | Cell membrane; Single-pass type I membrane protein. Endomembrane system; Single-pass type I membrane protein. Membrane clathrin-coated pit; Single-pass type I membrane protein. |
| P16110 | LEG3_MOUSE Galectin-3 OS=Mus musculus GN=Lgals3 PE=1 SV=3                                                   | 1.2E-12 | 50.2  | 19.7 | 6 (6 0 0 0 0)   | Cytoplasm. Nucleus. Secreted.                                                                                                                                                    |
| Q9JL15 | LEG8_MOUSE Galectin-8 OS=Mus musculus GN=Lgals8 PE=2 SV=1                                                   | 4.6E-06 | 20.1  | 6.3  | 2 (2 0 0 0 0)   | Cytoplasm.                                                                                                                                                                       |
| Q9JL15 | LEG8_MOUSE Galectin-8 OS=Mus musculus GN=Lgals8 PE=2 SV=1                                                   | 1.2E-08 | 30.2  | 10.4 | 3 (3 0 0 0 0)   | Cytoplasm.                                                                                                                                                                       |
| Q9Z210 | LETM1_MOUSE LETM1 and EF-hand domain-containing protein 1, mitochondrial OS=Mus musculus GN=Letm1 PE=2 SV=1 | 2.3E-14 | 70.3  | 17.9 | 7 (7 0 0 0 0)   | Mitochondrion inner membrane; Single-pass membrane protein.                                                                                                                      |
| P15702 | LEUK_MOUSE Leukosialin OS=Mus musculus GN=Spn PE=1 SV=1                                                     | 2.2E-13 | 30.2  | 12.4 | 3 (3 0 0 0 0)   | Membrane; Single-pass type I membrane protein.                                                                                                                                   |
| Q8C8U0 | LIPB1_MOUSE Liprin-beta-1 OS=Mus musculus GN=Ppfibp1 PE=1 SV=3                                              | 4.7E-06 | 30.2  | 4.1  | 3 (3 0 0 0 0)   | ND                                                                                                                                                                               |

|        |                                                                                                          |         |       |      |                 |                                                                                                                                                                                                                           |
|--------|----------------------------------------------------------------------------------------------------------|---------|-------|------|-----------------|---------------------------------------------------------------------------------------------------------------------------------------------------------------------------------------------------------------------------|
| Q9D0F3 | LMAN1_MOUSE Protein ERGIC-53 OS=Mus musculus GN=Lman1 PE=2 SV=1                                          | 1.0E-30 | 110.3 | 26.1 | 15 (15 0 0 0 0) | Endoplasmic reticulum-Golgi intermediate compartment membrane; Single-pass type I membrane protein. Golgi apparatus membrane; Single-pass membrane protein. Endoplasmic reticulum membrane; Single-pass membrane protein. |
| Q9DBH5 | LMAN2_MOUSE Vesicular integral-membrane protein VIP36 OS=Mus musculus GN=Lman2 PE=2 SV=1                 | 4.4E-15 | 90.3  | 26.8 | 16 (16 0 0 0 0) | Golgi apparatus membrane; Single-pass type I membrane protein.                                                                                                                                                            |
| Q8C3X8 | LMF2_MOUSE Lipase maturation factor 2 OS=Mus musculus GN=Lmf2 PE=2 SV=1                                  | 1.5E-07 | 20.2  | 4.7  | 2 (2 0 0 0 0)   | Endoplasmic reticulum membrane; Multi-pass membrane protein.                                                                                                                                                              |
| P48678 | LMNA_MOUSE Lamin-A/C OS=Mus musculus GN=Lmna PE=1 SV=2                                                   | 4.4E-10 | 40.2  | 7.2  | 4 (4 0 0 0 0)   | Nucleus. Nucleus envelope.                                                                                                                                                                                                |
| Q7TQ95 | LNP_MOUSE Protein lunapark OS=Mus musculus GN=Lnp PE=1 SV=1                                              | 1.1E-06 | 20.2  | 5.6  | 2 (2 0 0 0 0)   | Membrane; Multi-pass membrane protein.                                                                                                                                                                                    |
| Q8CGK3 | LONM_MOUSE Lon protease homolog, mitochondrial OS=Mus musculus GN=Lonp1 PE=1 SV=2                        | 1.9E-11 | 40.2  | 5.5  | 4 (4 0 0 0 0)   | Mitochondrion matrix.                                                                                                                                                                                                     |
| Q8JZZ7 | LPHN2_MOUSE Latrophilin-2 (Fragment) OS=Mus musculus GN=Lphn2 PE=1 SV=2                                  | 8.2E-09 | 40.2  | 5.8  | 6 (6 0 0 0 0)   | Cell membrane; Multi-pass membrane protein.                                                                                                                                                                               |
| Q6PB66 | LPPRC_MOUSE Leucine-rich PPR motif-containing protein, mitochondrial OS=Mus musculus GN=Lrpprc PE=1 SV=2 | 1.6E-06 | 80.2  | 6.7  | 8 (8 0 0 0 0)   | Mitochondrion. Nucleus. Nucleus nucleoplasm. Nucleus inner membrane. Nucleus outer membrane.                                                                                                                              |
| Q922Q8 | LRC59_MOUSE Leucine-rich repeat-containing protein 59 OS=Mus musculus GN=Lrrc59 PE=2 SV=1                | 1.0E-30 | 90.4  | 30.9 | 23 (23 0 0 0 0) | Microsome membrane; Single-pass type II membrane protein. Endoplasmic reticulum membrane; Single-pass type II                                                                                                             |

|        |                                                                                                      |         |       |      |                 |                                                                                                                                                                                                                                                                         |
|--------|------------------------------------------------------------------------------------------------------|---------|-------|------|-----------------|-------------------------------------------------------------------------------------------------------------------------------------------------------------------------------------------------------------------------------------------------------------------------|
|        |                                                                                                      |         |       |      |                 | membrane protein.                                                                                                                                                                                                                                                       |
| Q80WG5 | LRC8A_MOUSE Leucine-rich repeat-containing protein 8A OS=Mus musculus GN=Lrrc8a PE=1 SV=1            | 2.6E-08 | 30.2  | 4.4  | 3 (3 0 0 0 0)   | Membrane; Multi-pass membrane protein.                                                                                                                                                                                                                                  |
| Q8BGR2 | LRC8D_MOUSE Leucine-rich repeat-containing protein 8D OS=Mus musculus GN=Lrrc8d PE=2 SV=1            | 1.1E-06 | 20.2  | 2.8  | 2 (2 0 0 0 0)   | Membrane; Multi-pass membrane protein.                                                                                                                                                                                                                                  |
| Q91ZX7 | LRP1_MOUSE Prolow-density lipoprotein receptor-related protein 1 OS=Mus musculus GN=Lrp1 PE=1 SV=1   | 1.6E-14 | 600.3 | 13.7 | 87 (87 0 0 0 0) | Cell membrane; Single-pass type I membrane protein. Membrane $\hat{\epsilon}^{\circ}$ coated pit. Cell membrane; Peripheral membrane protein; Extracellular side. Membrane $\hat{\epsilon}^{\circ}$ coated pit. Cytoplasm. Nucleus.                                     |
| Q60767 | LY75_MOUSE Lymphocyte antigen 75 OS=Mus musculus GN=Ly75 PE=1 SV=1                                   | 5.8E-10 | 80.3  | 6.0  | 10 (10 0 0 0 0) | Membrane; Single-pass type I membrane protein.                                                                                                                                                                                                                          |
| Q80WJ7 | LYRIC_MOUSE Protein LYRIC OS=Mus musculus GN=Mtdh PE=1 SV=1                                          | 1.3E-06 | 30.2  | 6.9  | 3 (3 0 0 0 0)   | Endoplasmic reticulum membrane; Single-pass membrane protein. Nucleus membrane; Single-pass membrane protein. Cell junction $\hat{\epsilon}^{\circ}$ tight junction. Nucleus $\hat{\epsilon}^{\circ}$ nucleolus. Cytoplasm $\hat{\epsilon}^{\circ}$ perinuclear region. |
| Q9CR62 | M2OM_MOUSE Mitochondrial 2-oxoglutarate/malate carrier protein OS=Mus musculus GN=Slc25a11 PE=1 SV=3 | 3.0E-12 | 40.3  | 19.7 | 6 (6 0 0 0 0)   | Mitochondrion inner membrane; Multi-pass membrane protein.                                                                                                                                                                                                              |
| P39098 | MA1A2_MOUSE Mannosyl-oligosaccharide 1,2-alpha-mannosidase IB OS=Mus musculus GN=Man1a2 PE=2 SV=1    | 1.3E-10 | 30.2  | 7.8  | 3 (3 0 0 0 0)   | Golgi apparatus membrane; Single-pass type II membrane protein.                                                                                                                                                                                                         |
| P27046 | MA2A1_MOUSE Alpha-mannosidase 2 OS=Mus musculus GN=Man2a1 PE=1                                       | 7.0E-14 | 150.3 | 18.0 | 27 (27 0 0 0 0) | Golgi apparatus membrane; Single-pass type II                                                                                                                                                                                                                           |

|        |                                                                                                         |         |       |      |                 |                                                                                                                                   |
|--------|---------------------------------------------------------------------------------------------------------|---------|-------|------|-----------------|-----------------------------------------------------------------------------------------------------------------------------------|
|        | SV=1                                                                                                    |         |       |      |                 | membrane protein.                                                                                                                 |
| Q9QXZ0 | MACF1_MOUSE<br>Microtubule-actin cross-linking factor 1 OS=Mus musculus GN=Macf1 PE=1 SV=1              | 1.2E-10 | 130.2 | 2.9  | 18 (18 0 0 0 0) | Cytoplasm. Cytoplasmic cytoskeleton. Golgi apparatus. Cell membrane. Cell projection ruffle membrane. Cytoplasm. Golgi apparatus. |
| Q9CQY5 | MAGT1_MOUSE<br>Magnesium transporter protein 1 OS=Mus musculus GN=Magt1 PE=2 SV=1                       | 4.7E-07 | 30.2  | 10.1 | 4 (4 0 0 0 0)   | Endoplasmic reticulum membrane; Multi-pass membrane protein.                                                                      |
| Q99KE1 | MAOM_MOUSE<br>NAD-dependent malic enzyme, mitochondrial OS=Mus musculus GN=Me2 PE=2 SV=1                | 9.8E-05 | 20.1  | 1.7  | 2 (2 0 0 0 0)   | Mitochondrion matrix.                                                                                                             |
| P26645 | MARCS_MOUSE<br>Myristoylated alanine-rich C-kinase substrate OS=Mus musculus GN=Marcks PE=1 SV=2        | 1.0E-30 | 60.2  | 28.8 | 16 (16 0 0 0 0) | Cytoplasmic cytoskeleton. Membrane; Lipid anchor.                                                                                 |
| Q61166 | MARE1_MOUSE<br>Microtubule-associated protein RP/EB family member 1 OS=Mus musculus GN=Mapre1 PE=1 SV=3 | 3.2E-07 | 20.2  | 14.2 | 2 (2 0 0 0 0)   | Cytoplasm. Cytoplasmic cytoskeleton. Cytoplasmic cytoskeleton centrosome.                                                         |
| P97310 | MCM2_MOUSE<br>DNA replication licensing factor MCM2 OS=Mus musculus GN=Mcm2 PE=1 SV=3                   | 2.2E-05 | 40.2  | 3.9  | 4 (4 0 0 0 0)   | Nucleus.                                                                                                                          |
| P49717 | MCM4_MOUSE<br>DNA replication licensing factor MCM4 OS=Mus musculus GN=Mcm4 PE=2 SV=1                   | 6.1E-08 | 30.2  | 5.0  | 5 (5 0 0 0 0)   | Nucleus.                                                                                                                          |
| P49718 | MCM5_MOUSE<br>DNA replication licensing factor MCM5 OS=Mus musculus GN=Mcm5 PE=2 SV=1                   | 6.6E-09 | 70.2  | 14.6 | 8 (8 0 0 0 0)   | Nucleus.                                                                                                                          |
| P97311 | MCM6_MOUSE<br>DNA replication licensing factor MCM6 OS=Mus musculus GN=Mcm6 PE=1 SV=1                   | 9.7E-09 | 20.2  | 2.8  | 2 (2 0 0 0 0)   | Nucleus.                                                                                                                          |
| Q61881 | MCM7_MOUSE<br>DNA replication licensing factor MCM7 OS=Mus musculus GN=Mcm7 PE=2 SV=1                   | 9.4E-13 | 110.2 | 21.4 | 12 (12 0 0 0 0) | Nucleus.                                                                                                                          |

|        |                                                                                                                       |         |       |      |                 |                                                                                                               |
|--------|-----------------------------------------------------------------------------------------------------------------------|---------|-------|------|-----------------|---------------------------------------------------------------------------------------------------------------|
| P08249 | MDHM_MOUSE Malate dehydrogenase, mitochondrial OS=Mus musculus GN=Mdh2 PE=1 SV=3                                      | 7.8E-15 | 120.4 | 37.3 | 17 (17 0 0 0 0) | Mitochondrion matrix.                                                                                         |
| P06795 | MDR1_MOUSE Multidrug resistance protein 1 OS=Mus musculus GN=Abcb1 PE=1 SV=1                                          | 1.7E-14 | 68.2  | 7.8  | 9 (8 1 0 0 0)   | Membrane; Multi-pass membrane protein.                                                                        |
| Q07646 | MEST_MOUSE Mesoderm-specific transcript protein OS=Mus musculus GN=Mest PE=2 SV=1                                     | 9.1E-06 | 20.2  | 2.7  | 4 (4 0 0 0 0)   | Endoplasmic reticulum membrane; Multi-pass membrane protein.                                                  |
| Q811U4 | MFN1_MOUSE Mitofusin-1 OS=Mus musculus GN=Mfn1 PE=1 SV=2                                                              | 5.4E-08 | 40.2  | 6.6  | 4 (4 0 0 0 0)   | Mitochondrion outer membrane; Multi-pass membrane protein.                                                    |
| Q80U63 | MFN2_MOUSE Mitofusin-2 OS=Mus musculus GN=Mfn2 PE=1 SV=3                                                              | 1.6E-08 | 20.2  | 2.6  | 2 (2 0 0 0 0)   | Mitochondrion outer membrane; Multi-pass membrane protein.                                                    |
| P27808 | MGAT1_MOUSE Alpha-1,3-mannosyl-glycoprotein 2-beta-N-acetylglucosaminyltransferase OS=Mus musculus GN=Mgat1 PE=2 SV=1 | 7.0E-11 | 20.2  | 6.9  | 3 (3 0 0 0 0)   | Golgi apparatus membrane; Single-pass type II membrane protein.                                               |
| Q8BI84 | MIA3_MOUSE Melanoma inhibitory activity protein 3 OS=Mus musculus GN=Mia3 PE=1 SV=2                                   | 8.7E-08 | 30.2  | 2.0  | 5 (5 0 0 0 0)   | Endoplasmic reticulum membrane; Single-pass type I membrane protein.                                          |
| Q3THE2 | ML12B_MOUSE Myosin regulatory light chain 12B OS=Mus musculus GN=My112b PE=1 SV=2                                     | 1.3E-05 | 20.1  | 12.2 | 3 (3 0 0 0 0)   | ND                                                                                                            |
| Q6ZQI3 | MLEC_MOUSE Malectin OS=Mus musculus GN=Mlec PE=2 SV=2                                                                 | 9.9E-09 | 30.2  | 14.1 | 5 (5 0 0 0 0)   | Endoplasmic reticulum membrane; Single-pass type I membrane protein.                                          |
| P53690 | MMP14_MOUSE Matrix metalloproteinase-14 OS=Mus musculus GN=Mmp14 PE=2 SV=2                                            | 1.8E-07 | 50.1  | 8.8  | 5 (5 0 0 0 0)   | Membrane; Single-pass type I membrane protein; Extracellular side. Melanosome.                                |
| P26041 | MOES_MOUSE Moesin OS=Mus musculus GN=Msn PE=1 SV=3                                                                    | 4.6E-11 | 118.3 | 21.8 | 15 (14 1 0 0 0) | Cell membrane; Peripheral membrane protein; Cytoplasmic side. Cytoplasmic cytoskeleton. Apical cell membrane; |

|        |                                                                                               |         |       |      |                 |                                                                                                                                      |
|--------|-----------------------------------------------------------------------------------------------|---------|-------|------|-----------------|--------------------------------------------------------------------------------------------------------------------------------------|
|        |                                                                                               |         |       |      |                 | Peripheral membrane protein; Cytoplasmic side. Cell projection &microvillus membrane; Peripheral membrane protein; Cytoplasmic side. |
| Q80UM7 | MOGS_MOUSE Mannosyl-oligosaccharide glucosidase OS=Mus musculus GN=Mogs PE=2 SV=1             | 3.9E-11 | 80.2  | 11.6 | 12 (12 0 0 0 0) | Endoplasmic reticulum membrane; Single-pass type II membrane protein.                                                                |
| P53986 | MOT1_MOUSE Monocarboxylate transporter 1 OS=Mus musculus GN=Slc16a1 PE=1 SV=1                 | 1.1E-15 | 60.3  | 14.0 | 44 (44 0 0 0 0) | Cell membrane; Multi-pass membrane protein.                                                                                          |
| Q8VEM8 | MPCP_MOUSE Phosphate carrier protein, mitochondrial OS=Mus musculus GN=Slc25a3 PE=1 SV=1      | 7.5E-13 | 90.2  | 18.8 | 20 (20 0 0 0 0) | Mitochondrion inner membrane; Multi-pass membrane protein.                                                                           |
| P24668 | MPRD_MOUSE Cation-dependent mannose-6-phosphate receptor OS=Mus musculus GN=M6pr PE=1 SV=1    | 4.6E-14 | 40.3  | 19.8 | 8 (8 0 0 0 0)   | Lysosome membrane; Single-pass type I membrane protein.                                                                              |
| Q07113 | MPRI_MOUSE Cation-independent mannose-6-phosphate receptor OS=Mus musculus GN=Igf2r PE=1 SV=1 | 9.7E-08 | 100.2 | 3.6  | 12 (12 0 0 0 0) | Lysosome membrane; Single-pass type I membrane protein.                                                                              |
| Q64449 | MRC2_MOUSE C-type mannose receptor 2 OS=Mus musculus GN=Mrc2 PE=1 SV=2                        | 1.3E-11 | 60.2  | 4.7  | 10 (10 0 0 0 0) | Membrane; Single-pass type I membrane protein.                                                                                       |
| Q7TT50 | MRCKB_MOUSE Serine/threonine-protein kinase MRCK beta OS=Mus musculus GN=Cdc42bpb PE=1 SV=1   | 1.3E-09 | 40.2  | 3.4  | 4 (4 0 0 0 0)   | Cytoplasm. Cell membrane; Peripheral membrane protein; Cytoplasmic side. Cell junction.                                              |
| O35379 | MRP1_MOUSE Multidrug resistance-associated protein 1 OS=Mus musculus GN=Abcc1 PE=1 SV=1       | 2.9E-14 | 110.3 | 9.8  | 28 (28 0 0 0 0) | Cell membrane; Multi-pass membrane protein.                                                                                          |
| Q791T5 | MTCH1_MOUSE Mitochondrial carrier homolog 1 OS=Mus musculus GN=Mtch1 PE=1 SV=1                | 1.9E-07 | 30.1  | 8.2  | 3 (3 0 0 0 0)   | Mitochondrion inner membrane; Multi-pass membrane protein.                                                                           |
| Q791V5 | MTCH2_MOUSE Mitochondrial carrier homolog 2 OS=Mus musculus GN=Mtch2 PE=1                     | 1.2E-10 | 40.2  | 20.5 | 4 (4 0 0 0 0)   | Mitochondrion inner membrane; Multi-pass membrane protein.                                                                           |



|        |                                                                                                      |         |       |      |                      |                                                                                                                                                                                                      |  |
|--------|------------------------------------------------------------------------------------------------------|---------|-------|------|----------------------|------------------------------------------------------------------------------------------------------------------------------------------------------------------------------------------------------|--|
|        | SV=1                                                                                                 |         |       |      |                      |                                                                                                                                                                                                      |  |
| P47802 | MTX1_MOUSE Metaxin-1<br>OS=Mus musculus<br>GN=Mtx1 PE=1 SV=1                                         | 3.3E-09 | 20.1  | 9.5  | 2 (2 0 0 0 0)        | Mitochondrion<br>outer membrane.                                                                                                                                                                     |  |
| Q9CZH7 | MXRA7_MOUSE Matrix-<br>remodeling-associated<br>protein 7 OS=Mus musculus<br>GN=Mxra7 PE=1 SV=2      | 3.0E-14 | 20.2  | 16.3 | 4 (4 0 0 0 0)        | Membrane; Single-<br>pass membrane<br>protein.                                                                                                                                                       |  |
| Q9DBV4 | MXRA8_MOUSE Matrix-<br>remodeling-associated<br>protein 8 OS=Mus musculus<br>GN=Mxra8 PE=2 SV=1      | 1.6E-08 | 30.2  | 7.5  | 3 (3 0 0 0 0)        | Membrane; Single-<br>pass type I<br>membrane protein.                                                                                                                                                |  |
| O35682 | MYADM_MOUSE<br>Myeloid-associated<br>differentiation marker<br>OS=Mus musculus<br>GN=Myadm PE=2 SV=2 | 3.0E-12 | 30.2  | 8.4  | 24 (24 0 0 0<br>0)   | Membrane; Multi-<br>pass membrane<br>protein.                                                                                                                                                        |  |
| Q61879 | MYH10_MOUSE Myosin-<br>10 OS=Mus musculus<br>GN=Myh10 PE=1 SV=2                                      | 2.7E-12 | 100.3 | 5.5  | 12 (12 0 0 0<br>0)   | ND                                                                                                                                                                                                   |  |
| O08638 | MYH11_MOUSE Myosin-<br>11 OS=Mus musculus<br>GN=Myh11 PE=1 SV=1                                      | 3.6E-12 | 68.2  | 3.6  | 11 (10 1 0 0<br>0)   | Melanosome.<br>Cytoplasm &#x2191<br>myofibril.                                                                                                                                                       |  |
| Q8VDD5 | MYH9_MOUSE Myosin-9<br>OS=Mus musculus<br>GN=Myh9 PE=1 SV=4                                          | 1.2E-14 | 758.3 | 33.5 | 104 (103 1 0<br>0 0) | ND                                                                                                                                                                                                   |  |
| Q60605 | MYL6_MOUSE Myosin<br>light polypeptide 6 OS=Mus<br>musculus GN=Myl6 PE=1<br>SV=3                     | 9.4E-12 | 30.2  | 20.5 | 8 (8 0 0 0 0)        | ND                                                                                                                                                                                                   |  |
| P46735 | MYO1B_MOUSE Myosin-<br>Ib OS=Mus musculus<br>GN=Myo1b PE=2 SV=2                                      | 6.0E-10 | 50.2  | 5.0  | 5 (5 0 0 0 0)        | ND                                                                                                                                                                                                   |  |
| Q9WTI7 | MYO1C_MOUSE Myosin-<br>Ic OS=Mus musculus<br>GN=Myo1c PE=1 SV=2                                      | 8.0E-12 | 190.2 | 22.9 | 37 (37 0 0 0<br>0)   | Cytoplasm. Cell<br>membrane. Cell<br>projection &#x2191<br>stereocilium<br>membrane.<br>Nucleus &#x2191<br>nucleolus. Nucleus<br>&#x2191 nucleoplasm.<br>Nucleus &#x2191<br>nuclear pore<br>complex. |  |
| Q5SYD0 | MYO1D_MOUSE Myosin-<br>Id OS=Mus musculus<br>GN=Myo1d PE=1 SV=1                                      | 3.6E-05 | 18.1  | 1.8  | 2 (1 1 0 0 0)        | ND                                                                                                                                                                                                   |  |
| Q69ZN7 | MYOF_MOUSE Myoferlin<br>OS=Mus musculus<br>GN=Myof PE=1 SV=2                                         | 3.3E-15 | 880.3 | 36.8 | 216 (216 0 0<br>0 0) | Cell membrane;<br>Single-pass type II<br>membrane protein.<br>Nucleus<br>membrane; Single-<br>pass type II                                                                                           |  |

*A novel role of mitochondria in muscle injury*

|        |                                                                                                              |         |       |      |                   |                                                                                                                                                                   |
|--------|--------------------------------------------------------------------------------------------------------------|---------|-------|------|-------------------|-------------------------------------------------------------------------------------------------------------------------------------------------------------------|
|        |                                                                                                              |         |       |      |                   | membrane protein.<br>Cytoplasmic vesicle membrane;<br>Single-pass type II membrane protein.                                                                       |
| Q9DBR7 | MYPT1_MOUSE Protein phosphatase 1 regulatory subunit 12A OS=Mus musculus GN=Ppp1r12a PE=1 SV=2               | 5.0E-07 | 20.2  | 2.3  | 2 (2 0 0 0 0)     | Cytoplasm.                                                                                                                                                        |
| Q9DCN2 | NB5R3_MOUSE NADH-cytochrome b5 reductase 3 OS=Mus musculus GN=Cyb5r3 PE=1 SV=3                               | 1.2E-14 | 190.3 | 41.5 | 40 (40 0 0 0 0)   | Endoplasmic reticulum membrane; Lipid-anchor; Cytoplasmic side. Mitochondrion outer membrane; Lipid-anchor; Cytoplasmic side. Cytoplasmic cytosol.                |
| P13595 | NCAM1_MOUSE Neural cell adhesion molecule 1 OS=Mus musculus GN=Ncam1 PE=1 SV=3                               | 1.0E-30 | 250.3 | 20.7 | 112 (112 0 0 0 0) | Cell membrane; Single-pass type I membrane protein. Cell membrane; Lipid-anchor GPI-anchor.                                                                       |
| P28660 | NCKP1_MOUSE Nck-associated protein 1 OS=Mus musculus GN=Nckap1 PE=2 SV=2                                     | 2.3E-06 | 20.2  | 1.9  | 2 (2 0 0 0 0)     | Cell membrane; Single-pass membrane protein; Cytoplasmic side. Cell projection lamellipodium membrane; Single-pass membrane protein; Cytoplasmic side. Cytoplasm. |
| Q8VCM8 | NCLN_MOUSE Nicalin OS=Mus musculus GN=Ncln PE=2 SV=2                                                         | 1.2E-09 | 70.3  | 15.5 | 13 (13 0 0 0 0)   | Endoplasmic reticulum membrane; Single-pass membrane protein.                                                                                                     |
| P37040 | NCPR_MOUSE NADPH--cytochrome P450 reductase OS=Mus musculus GN=Por PE=1 SV=2                                 | 2.6E-14 | 110.3 | 23.3 | 18 (18 0 0 0 0)   | Endoplasmic reticulum membrane; Peripheral membrane protein.                                                                                                      |
| Q9Z1P6 | NDUA7_MOUSE NADH dehydrogenase [ubiquinone] 1 alpha subcomplex subunit 7 OS=Mus musculus GN=Ndufa7 PE=1 SV=3 | 7.3E-06 | 20.2  | 19.5 | 2 (2 0 0 0 0)     | Mitochondrion inner membrane; Peripheral membrane protein; Matrix side.                                                                                           |

|        |                                                                                                                               |         |      |      |               |                                                                                   |
|--------|-------------------------------------------------------------------------------------------------------------------------------|---------|------|------|---------------|-----------------------------------------------------------------------------------|
| Q9DCJ5 | NDUA8_MOUSE NADH dehydrogenase [ubiquinone] 1 alpha subcomplex subunit 8 OS=Mus musculus GN=Ndufa8 PE=1 SV=3                  | 1.8E-07 | 20.3 | 18.6 | 3 (3 0 0 0 0) | Mitochondrion. Mitochondrion intermembrane space.                                 |
| Q9DC69 | NDUA9_MOUSE NADH dehydrogenase [ubiquinone] 1 alpha subcomplex subunit 9, mitochondrial OS=Mus musculus GN=Ndufa9 PE=1 SV=1   | 4.6E-11 | 40.2 | 17.2 | 5 (5 0 0 0 0) | Mitochondrion matrix.                                                             |
| Q99LC3 | NDUAA_MOUSE NADH dehydrogenase [ubiquinone] 1 alpha subcomplex subunit 10, mitochondrial OS=Mus musculus GN=Ndufa10 PE=1 SV=1 | 4.4E-08 | 20.2 | 9.3  | 2 (2 0 0 0 0) | Mitochondrion matrix.                                                             |
| Q7TMF3 | NDUAC_MOUSE NADH dehydrogenase [ubiquinone] 1 alpha subcomplex subunit 12 OS=Mus musculus GN=Ndufa12 PE=1 SV=2                | 1.5E-11 | 20.2 | 20.0 | 3 (3 0 0 0 0) | Mitochondrion inner membrane; Peripheral membrane protein; Matrix side.           |
| Q9ERS2 | NDUAD_MOUSE NADH dehydrogenase [ubiquinone] 1 alpha subcomplex subunit 13 OS=Mus musculus GN=Ndufa13 PE=1 SV=3                | 1.9E-08 | 40.2 | 33.3 | 5 (5 0 0 0 0) | Mitochondrion inner membrane; Single-pass membrane protein; Matrix side. Nucleus. |
| Q9CQC7 | NDUB4_MOUSE NADH dehydrogenase [ubiquinone] 1 beta subcomplex subunit 4 OS=Mus musculus GN=Ndufb4 PE=1 SV=3                   | 1.7E-14 | 20.3 | 29.5 | 3 (3 0 0 0 0) | Mitochondrion inner membrane; Single-pass membrane protein; Matrix side.          |
| Q9DCS9 | NDUBA_MOUSE NADH dehydrogenase [ubiquinone] 1 beta subcomplex subunit 10 OS=Mus musculus GN=Ndufb10 PE=1 SV=3                 | 1.1E-14 | 20.3 | 17.0 | 2 (2 0 0 0 0) | Mitochondrion inner membrane; Peripheral membrane protein; Matrix side.           |
| Q9DCS9 | NDUBA_MOUSE NADH dehydrogenase [ubiquinone] 1 beta subcomplex subunit 10 OS=Mus musculus GN=Ndufb10 PE=1 SV=3                 | 5.6E-16 | 20.2 | 17.0 | 2 (2 0 0 0 0) | Mitochondrion inner membrane; Peripheral membrane protein; Matrix side.           |
| Q91VD9 | NDUS1_MOUSE NADH-ubiquinone oxidoreductase 75 kDa subunit, mitochondrial OS=Mus musculus GN=Ndufs1 PE=1 SV=1                  | 3.1E-09 | 90.2 | 15.7 | 9 (9 0 0 0 0) | Mitochondrion inner membrane.                                                     |
| Q9DCT2 | NDUS3_MOUSE NADH dehydrogenase [ubiquinone] iron-sulfur protein 3, mitochondrial OS=Mus musculus GN=Ndufs3 PE=1 SV=2          | 8.4E-11 | 60.2 | 28.9 | 8 (8 0 0 0 0) | Mitochondrion inner membrane.                                                     |

*A novel role of mitochondria in muscle injury*

|        |                                                                                                                      |         |       |      |                 |                                                                                                                                |
|--------|----------------------------------------------------------------------------------------------------------------------|---------|-------|------|-----------------|--------------------------------------------------------------------------------------------------------------------------------|
| Q8K3J1 | NDUS8_MOUSE NADH dehydrogenase [ubiquinone] iron-sulfur protein 8, mitochondrial OS=Mus musculus GN=Ndufs8 PE=1 SV=1 | 4.4E-05 | 20.1  | 4.2  | 2 (2 0 0 0 0)   | Mitochondrion.                                                                                                                 |
| P46935 | NEDD4_MOUSE E3 ubiquitin-protein ligase NEDD4 OS=Mus musculus GN=Nedd4 PE=1 SV=3                                     | 4.7E-14 | 50.2  | 8.5  | 5 (5 0 0 0 0)   | Cytoplasm. Cell membrane; Peripheral membrane protein.                                                                         |
| Q6P5H2 | NEST_MOUSE Nestin OS=Mus musculus GN=Nes PE=1 SV=1                                                                   | 1.3E-12 | 310.3 | 24.1 | 88 (88 0 0 0 0) | ND                                                                                                                             |
| Q8R1F1 | NIBL1_MOUSE Niban-like protein 1 OS=Mus musculus GN=Fam129b PE=2 SV=2                                                | 6.2E-08 | 30.1  | 4.1  | 4 (4 0 0 0 0)   | Cytoplasm &° cytosol. Cell junction &° adherens junction.                                                                      |
| P57716 | NICA_MOUSE Nicastrin OS=Mus musculus GN=Nestn PE=1 SV=2                                                              | 6.7E-14 | 60.2  | 8.1  | 22 (22 0 0 0 0) | Membrane; Single-pass type I membrane protein. Melanosome.                                                                     |
| Q01705 | NOTC1_MOUSE Neurogenic locus notch homolog protein 1 OS=Mus musculus GN=Notch1 PE=1 SV=2                             | 2.4E-05 | 20.1  | 0.4  | 2 (2 0 0 0 0)   | Cell membrane; Single-pass type I membrane protein. Nucleus.                                                                   |
| P28656 | NPIL1_MOUSE Nucleosome assembly protein 1-like 1 OS=Mus musculus GN=Nap111 PE=1 SV=2                                 | 3.1E-11 | 30.2  | 9.7  | 3 (3 0 0 0 0)   | Nucleus. Melanosome.                                                                                                           |
| P97300 | NPTN_MOUSE Neuroplastin OS=Mus musculus GN=Nptn PE=1 SV=2                                                            | 1.0E-09 | 60.2  | 21.0 | 23 (23 0 0 0 0) | Cell membrane; Single-pass type I membrane protein.                                                                            |
| Q9R1J0 | NSDHL_MOUSE Sterol-4-alpha-carboxylate 3-dehydrogenase, decarboxylating OS=Mus musculus GN=Nsdhl PE=2 SV=1           | 6.0E-10 | 50.2  | 17.7 | 6 (6 0 0 0 0)   | Membrane; Single-pass membrane protein.                                                                                        |
| P46460 | NSF_MOUSE Vesicle-fusing ATPase OS=Mus musculus GN=Nsf PE=1 SV=2                                                     | 6.8E-09 | 50.2  | 7.5  | 5 (5 0 0 0 0)   | Cytoplasm.                                                                                                                     |
| Q99P88 | NU155_MOUSE Nuclear pore complex protein Nup155 OS=Mus musculus GN=Nup155 PE=2 SV=1                                  | 3.2E-08 | 20.2  | 2.5  | 2 (2 0 0 0 0)   | Nucleus &° nuclear pore complex. Nucleus membrane; Peripheral membrane protein; Cytoplasmic side. Nucleus membrane; Peripheral |

*A novel role of mitochondria in muscle injury*

|        |                                                                                                                       |         |       |      |                    |                                                                                                                                                              |
|--------|-----------------------------------------------------------------------------------------------------------------------|---------|-------|------|--------------------|--------------------------------------------------------------------------------------------------------------------------------------------------------------|
|        |                                                                                                                       |         |       |      |                    | membrane protein;<br>Nucleoplasmic<br>side.                                                                                                                  |
| Q80U93 | NU214_MOUSE Nuclear<br>pore complex protein<br>Nup214 OS=Mus musculus<br>GN=Nup214 PE=1 SV=2                          | 6.0E-07 | 40.2  | 2.6  | 5 (5 0 0 0 0)      | Nucleus $\hat{\epsilon}^{\circ}$<br>nuclear pore<br>complex.                                                                                                 |
| Q9R061 | NUBP2_MOUSE Cytosolic<br>Fe-S cluster assembly factor<br>NUBP2 OS=Mus musculus<br>GN=Nubp2 PE=1 SV=1                  | 2.4E-09 | 20.2  | 11.3 | 2 (2 0 0 0 0)      | Nucleus.<br>Cytoplasm $\hat{\epsilon}^{\circ}$<br>cytoskeleton $\hat{\epsilon}^{\circ}$<br>centrosome.                                                       |
| Q02819 | NUCB1_MOUSE<br>Nucleobindin-1 OS=Mus<br>musculus GN=Nucb1 PE=1<br>SV=2                                                | 4.9E-12 | 200.2 | 42.3 | 37 (37 0 0 0<br>0) | Golgi apparatus $\hat{\epsilon}^{\circ}$<br>cis-Golgi network<br>membrane;<br>Peripheral<br>membrane protein;<br>Lumenal side.<br>Cytoplasm.                 |
| P81117 | NUCB2_MOUSE<br>Nucleobindin-2 OS=Mus<br>musculus GN=Nucb2 PE=1<br>SV=2                                                | 3.2E-06 | 30.2  | 7.4  | 3 (3 0 0 0 0)      | Perikaryon.<br>Endoplasmic<br>reticulum. Nucleus<br>envelope.                                                                                                |
| P09405 | NUCL_MOUSE Nucleolin<br>OS=Mus musculus GN=Ncl<br>PE=1 SV=2                                                           | 3.2E-10 | 30.2  | 6.4  | 6 (6 0 0 0 0)      | Nucleus $\hat{\epsilon}^{\circ}$<br>nucleolus.<br>Cytoplasm.                                                                                                 |
| O35685 | NUDC_MOUSE Nuclear<br>migration protein nudC<br>OS=Mus musculus<br>GN=Nudc PE=1 SV=1                                  | 2.2E-05 | 20.1  | 6.0  | 2 (2 0 0 0 0)      | Cytoplasm $\hat{\epsilon}^{\circ}$<br>cytoskeleton.<br>Nucleus.                                                                                              |
| Q63850 | NUP62_MOUSE Nuclear<br>pore glycoprotein p62<br>OS=Mus musculus<br>GN=Nup62 PE=1 SV=2                                 | 6.8E-07 | 20.2  | 4.6  | 2 (2 0 0 0 0)      | Nucleus $\hat{\epsilon}^{\circ}$<br>nuclear pore<br>complex.<br>Cytoplasm $\hat{\epsilon}^{\circ}$<br>cytoskeleton $\hat{\epsilon}^{\circ}$<br>spindle pole. |
| Q8CEC0 | NUP88_MOUSE Nuclear<br>pore complex protein Nup88<br>OS=Mus musculus<br>GN=Nup88 PE=2 SV=1                            | 1.2E-06 | 60.2  | 9.7  | 6 (6 0 0 0 0)      | Nucleus $\hat{\epsilon}^{\circ}$<br>nuclear pore<br>complex.                                                                                                 |
| Q8BJ71 | NUP93_MOUSE Nuclear<br>pore complex protein Nup93<br>OS=Mus musculus<br>GN=Nup93 PE=2 SV=1                            | 4.8E-08 | 40.2  | 5.5  | 4 (4 0 0 0 0)      | Nucleus $\hat{\epsilon}^{\circ}$<br>nuclear pore<br>complex.                                                                                                 |
| P29758 | OAT_MOUSE Ornithine<br>aminotransferase,<br>mitochondrial OS=Mus<br>musculus GN=Oat PE=1<br>SV=1                      | 3.5E-11 | 40.3  | 11.6 | 4 (4 0 0 0 0)      | Mitochondrion<br>matrix.                                                                                                                                     |
| Q60597 | ODO1_MOUSE 2-<br>oxoglutarate dehydrogenase<br>E1 component,<br>mitochondrial OS=Mus<br>musculus GN=Ogdh PE=1<br>SV=3 | 3.1E-10 | 60.2  | 5.0  | 6 (6 0 0 0 0)      | Mitochondrion<br>matrix.                                                                                                                                     |

*A novel role of mitochondria in muscle injury*

|        |                                                                                                                                                                  |         |       |      |                 |                                                                                                                             |
|--------|------------------------------------------------------------------------------------------------------------------------------------------------------------------|---------|-------|------|-----------------|-----------------------------------------------------------------------------------------------------------------------------|
| Q9D2G2 | ODO2_MOUSE<br>Dihydrolipoyllysine-residue succinyltransferase component of 2-oxoglutarate dehydrogenase complex, mitochondrial OS=Mus musculus GN=Dlst PE=1 SV=1 | 2.2E-07 | 30.2  | 7.7  | 3 (3 0 0 0 0)   | Mitochondrion.                                                                                                              |
| Q8BMF4 | ODP2_MOUSE<br>Dihydrolipoyllysine-residue acetyltransferase component of pyruvate dehydrogenase complex, mitochondrial OS=Mus musculus GN=Dlat PE=1 SV=2         | 6.7E-15 | 80.2  | 16.0 | 10 (10 0 0 0 0) | Mitochondrion matrix.                                                                                                       |
| Q9D051 | ODPB_MOUSE<br>Pyruvate dehydrogenase E1 component subunit beta, mitochondrial OS=Mus musculus GN=Pdhh PE=1 SV=1                                                  | 3.8E-12 | 30.2  | 12.3 | 4 (4 0 0 0 0)   | Mitochondrion matrix.                                                                                                       |
| P58281 | OPA1_MOUSE<br>Dynammin-like 120 kDa protein, mitochondrial OS=Mus musculus GN=Opa1 PE=1 SV=1                                                                     | 1.2E-07 | 30.1  | 3.2  | 3 (3 0 0 0 0)   | Mitochondrion inner membrane; Single-pass membrane protein. Mitochondrion intermembrane space.                              |
| O54734 | OST48_MOUSE<br>Dolichyl-diphosphooligosaccharide--protein glycosyltransferase 48 kDa subunit OS=Mus musculus GN=Ddost PE=1 SV=1                                  | 1.0E-30 | 80.3  | 25.6 | 13 (13 0 0 0 0) | Endoplasmic reticulum membrane; Single-pass type I membrane protein.                                                        |
| O54901 | OX2G_MOUSE<br>OX-2 membrane glycoprotein OS=Mus musculus GN=Cd200 PE=1 SV=1                                                                                      | 2.4E-08 | 70.2  | 21.2 | 8 (8 0 0 0 0)   | Cell membrane; Single-pass type I membrane protein.                                                                         |
| Q3V1T4 | P3H1_MOUSE<br>Prolyl 3-hydroxylase 1 OS=Mus musculus GN=Lepre1 PE=2 SV=2                                                                                         | 4.3E-07 | 18.2  | 3.2  | 2 (1 1 0 0 0)   | Endoplasmic reticulum. Secreted $\hat{\epsilon}^{\circ}$ extracellular space $\hat{\epsilon}^{\circ}$ extracellular matrix. |
| Q60715 | P4HA1_MOUSE<br>Prolyl 4-hydroxylase subunit alpha-1 OS=Mus musculus GN=P4ha1 PE=2 SV=2                                                                           | 1.9E-07 | 40.2  | 9.0  | 4 (4 0 0 0 0)   | Endoplasmic reticulum lumen.                                                                                                |
| Q9Z110 | P5CS_MOUSE<br>Delta-1-pyrroline-5-carboxylate synthetase OS=Mus musculus GN=Aldh18a1 PE=2 SV=1                                                                   | 7.8E-15 | 130.3 | 19.1 | 15 (15 0 0 0 0) | Mitochondrion inner membrane.                                                                                               |

|        |                                                                                                                |         |      |      |               |                                                                                                                                       |
|--------|----------------------------------------------------------------------------------------------------------------|---------|------|------|---------------|---------------------------------------------------------------------------------------------------------------------------------------|
| P47713 | PA24A_MOUSE Cytosolic phospholipase A2 OS=Mus musculus GN=Pla2g4a PE=1 SV=1                                    | 7.6E-05 | 20.1 | 3.3  | 2 (2 0 0 0 0) | Cytoplasm. Cytoplasmic vesicle.                                                                                                       |
| P29341 | PABP1_MOUSE Polyadenylate-binding protein 1 OS=Mus musculus GN=Pabpc1 PE=1 SV=1                                | 1.6E-11 | 40.2 | 11.2 | 5 (5 0 0 0 0) | Cytoplasm. Nucleus.                                                                                                                   |
| Q9CY58 | PAIRB_MOUSE Plasminogen activator inhibitor 1 RNA-binding protein OS=Mus musculus GN=Serbp1 PE=1 SV=2          | 1.1E-11 | 50.3 | 14.0 | 6 (6 0 0 0 0) | Cytoplasm. Nucleus. Cytoplasm $\hat{c}$ ° perinuclear region.                                                                         |
| Q8BR92 | PALM2_MOUSE Paralemmin-2 OS=Mus musculus GN=Palm2 PE=1 SV=1                                                    | 6.9E-12 | 20.3 | 8.0  | 4 (4 0 0 0 0) | Cell membrane; Lipid-anchor; Cytoplasmic side.                                                                                        |
| Q2EMV9 | PAR14_MOUSE Poly [ADP-ribose] polymerase 14 OS=Mus musculus GN=Parp14 PE=1 SV=2                                | 2.9E-10 | 30.2 | 2.3  | 3 (3 0 0 0 0) | Nucleus. Cytoplasm.                                                                                                                   |
| Q8CAS9 | PARP9_MOUSE Poly [ADP-ribose] polymerase 9 OS=Mus musculus GN=Parp9 PE=1 SV=2                                  | 1.1E-08 | 20.2 | 2.8  | 2 (2 0 0 0 0) | Cytoplasm $\hat{c}$ ° cytosol. Nucleus.                                                                                               |
| Q3TVI8 | PBIP1_MOUSE Pre-B-cell leukemia transcription factor-interacting protein 1 OS=Mus musculus GN=Pbxip1 PE=1 SV=2 | 7.1E-08 | 60.2 | 8.7  | 6 (6 0 0 0 0) | Cytoplasm $\hat{c}$ ° cytoskeleton. Nucleus.                                                                                          |
| Q3TFD2 | PCAT1_MOUSE Lysophosphatidylcholine acyltransferase 1 OS=Mus musculus GN=Lpcat1 PE=1 SV=1                      | 1.6E-08 | 30.2 | 5.8  | 5 (5 0 0 0 0) | Endoplasmic reticulum membrane; Single-pass type II membrane protein. Golgi apparatus membrane; Single-pass type II membrane protein. |
| P60335 | PCBP1_MOUSE Poly(rC)-binding protein 1 OS=Mus musculus GN=Pcbp1 PE=1 SV=1                                      | 6.0E-12 | 30.3 | 12.4 | 3 (3 0 0 0 0) | Nucleus.                                                                                                                              |
| Q61990 | PCBP2_MOUSE Poly(rC)-binding protein 2 OS=Mus musculus GN=Pcbp2 PE=1 SV=1                                      | 8.6E-11 | 30.2 | 10.5 | 5 (5 0 0 0 0) | Nucleus. Cytoplasm.                                                                                                                   |
| Q8BH04 | PCKGM_MOUSE Phosphoenolpyruvate carboxykinase [GTP], mitochondrial OS=Mus musculus GN=Pck2 PE=2 SV=1           | 8.9E-14 | 90.3 | 20.6 | 9 (9 0 0 0 0) | Mitochondrion.                                                                                                                        |

|        |                                                                                                           |         |       |      |                    |                                                                                                                                                         |
|--------|-----------------------------------------------------------------------------------------------------------|---------|-------|------|--------------------|---------------------------------------------------------------------------------------------------------------------------------------------------------|
| Q9R0L6 | PCMI_MOUSE<br>Pericentriolar material 1<br>protein OS=Mus musculus<br>GN=Pcm1 PE=1 SV=1                   | 3.7E-09 | 40.2  | 2.0  | 6 (6 0 0 0 0)      | Cytoplasm $\hat{e}^{\circ}$<br>cytoskeleton.<br>Cytoplasm $\hat{e}^{\circ}$<br>cytoskeleton $\hat{e}^{\circ}$<br>centrosome.<br>Cytoplasmic<br>granule. |
| P48725 | PCNT_MOUSE Pericentrin<br>OS=Mus musculus GN=Pcnt<br>PE=1 SV=1                                            | 9.4E-06 | 40.2  | 2.0  | 4 (4 0 0 0 0)      | Cytoplasm $\hat{e}^{\circ}$<br>cytoskeleton $\hat{e}^{\circ}$<br>centrosome.                                                                            |
| Q9CQF9 | PCYOX_MOUSE<br>Prenylcysteine oxidase<br>OS=Mus musculus<br>GN=Pcyox1 PE=1 SV=1                           | 4.8E-06 | 30.2  | 8.5  | 3 (3 0 0 0 0)      | Lysosome.                                                                                                                                               |
| Q8C7K6 | PCYXL_MOUSE<br>Prenylcysteine oxidase-like<br>OS=Mus musculus<br>GN=Pcyox11 PE=2 SV=1                     | 4.0E-07 | 20.2  | 2.2  | 3 (3 0 0 0 0)      | Secreted.                                                                                                                                               |
| Q9WU78 | PDC6I_MOUSE<br>Programmed cell death 6-<br>interacting protein OS=Mus<br>musculus GN=Pdcd6ip PE=1<br>SV=2 | 2.2E-12 | 130.3 | 18.4 | 14 (14 0 0 0<br>0) | Cytoplasm $\hat{e}^{\circ}$<br>cytosol.<br>Melanosome.<br>Cytoplasm $\hat{e}^{\circ}$<br>cytoskeleton $\hat{e}^{\circ}$<br>centrosome.                  |
| P09103 | PDIA1_MOUSE Protein<br>disulfide-isomerase OS=Mus<br>musculus GN=P4hb PE=1<br>SV=1                        | 1.0E-13 | 230.3 | 46.4 | 33 (33 0 0 0<br>0) | Endoplasmic<br>reticulum lumen.<br>Melanosome. Cell<br>membrane;<br>Peripheral<br>membrane protein.                                                     |
| P27773 | PDIA3_MOUSE Protein<br>disulfide-isomerase A3<br>OS=Mus musculus<br>GN=Pdia3 PE=1 SV=2                    | 2.7E-14 | 290.3 | 48.5 | 58 (58 0 0 0<br>0) | Endoplasmic<br>reticulum lumen.<br>Melanosome.                                                                                                          |
| P08003 | PDIA4_MOUSE Protein<br>disulfide-isomerase A4<br>OS=Mus musculus<br>GN=Pdia4 PE=1 SV=2                    | 7.8E-15 | 188.3 | 31.2 | 19 (18 1 0 0<br>0) | Endoplasmic<br>reticulum lumen.<br>Melanosome.                                                                                                          |
| Q922R8 | PDIA6_MOUSE Protein<br>disulfide-isomerase A6<br>OS=Mus musculus<br>GN=Pdia6 PE=1 SV=3                    | 5.7E-12 | 80.3  | 25.0 | 12 (12 0 0 0<br>0) | Endoplasmic<br>reticulum lumen.<br>Cell membrane.<br>Melanosome.                                                                                        |
| O70400 | PDLI1_MOUSE PDZ and<br>LIM domain protein 1<br>OS=Mus musculus<br>GN=Pdlim1 PE=2 SV=4                     | 5.3E-06 | 20.1  | 7.6  | 2 (2 0 0 0 0)      | Cytoplasm $\hat{e}^{\circ}$<br>cytoskeleton.                                                                                                            |
| P15331 | PERI_MOUSE Peripherin<br>OS=Mus musculus GN=Prph<br>PE=1 SV=2                                             | 1.2E-07 | 20.2  | 4.4  | 8 (8 0 0 0 0)      | ND                                                                                                                                                      |
| Q9R0A0 | PEX14_MOUSE<br>Peroxisomal membrane<br>protein PEX14 OS=Mus<br>musculus GN=Pex14 PE=1<br>SV=1             | 1.3E-08 | 50.2  | 16.2 | 6 (6 0 0 0 0)      | Peroxisome<br>membrane;<br>Peripheral<br>membrane protein;<br>Cytoplasmic side.                                                                         |



|        |                                                                                                                                |         |       |      |                 |                                                                                                                                                                                                        |
|--------|--------------------------------------------------------------------------------------------------------------------------------|---------|-------|------|-----------------|--------------------------------------------------------------------------------------------------------------------------------------------------------------------------------------------------------|
| Q9DBJ1 | PGAM1_MOUSE<br>Phosphoglycerate mutase 1<br>OS=Mus musculus<br>GN=Pgam1 PE=1 SV=3                                              | 6.5E-09 | 60.2  | 32.7 | 6 (6 0 0 0 0)   | ND                                                                                                                                                                                                     |
| Q05793 | PGBM_MOUSE Basement<br>membrane-specific heparan<br>sulfate proteoglycan core<br>protein OS=Mus musculus<br>GN=Hspg2 PE=1 SV=1 | 8.3E-09 | 80.2  | 3.0  | 13 (13 0 0 0 0) | Secreted $\hat{\epsilon}^{\circ}$<br>extracellular space<br>$\hat{\epsilon}^{\circ}$ extracellular<br>matrix $\hat{\epsilon}^{\circ}$<br>basement<br>membrane.                                         |
| P05622 | PGFRB_MOUSE Beta-type<br>platelet-derived growth<br>factor receptor OS=Mus<br>musculus GN=Pdgfrb PE=1<br>SV=1                  | 2.5E-11 | 170.2 | 19.2 | 32 (32 0 0 0 0) | Membrane; Single-<br>pass type I<br>membrane protein.                                                                                                                                                  |
| O55022 | PGRC1_MOUSE<br>Membrane-associated<br>progesterone receptor<br>component 1 OS=Mus<br>musculus GN=Pgrmc1 PE=1<br>SV=4           | 8.9E-15 | 50.3  | 22.6 | 7 (7 0 0 0 0)   | Microsome<br>membrane; Single-<br>pass membrane<br>protein.<br>Endoplasmic<br>reticulum<br>membrane; Single-<br>pass membrane<br>protein.                                                              |
| Q80UU9 | PGRC2_MOUSE<br>Membrane-associated<br>progesterone receptor<br>component 2 OS=Mus<br>musculus GN=Pgrmc2 PE=1<br>SV=2           | 1.0E-30 | 20.3  | 18.0 | 3 (3 0 0 0 0)   | Membrane; Single-<br>pass membrane<br>protein.                                                                                                                                                         |
| P67778 | PHB_MOUSE Prohibitin<br>OS=Mus musculus GN=Phb<br>PE=1 SV=1                                                                    | 2.7E-12 | 110.3 | 42.6 | 16 (16 0 0 0 0) | Mitochondrion<br>inner membrane.                                                                                                                                                                       |
| O35129 | PHB2_MOUSE Prohibitin-2<br>OS=Mus musculus<br>GN=Phb2 PE=1 SV=1                                                                | 2.8E-14 | 130.3 | 40.5 | 29 (29 0 0 0 0) | Mitochondrion<br>inner membrane.<br>Cytoplasm.<br>Nucleus.                                                                                                                                             |
| Q6PD26 | PIGS_MOUSE GPI<br>transamidase component<br>PIG-S OS=Mus musculus<br>GN=Pigs PE=1 SV=3                                         | 2.8E-14 | 120.3 | 33.2 | 16 (16 0 0 0 0) | Endoplasmic<br>reticulum<br>membrane; Multi-<br>pass membrane<br>protein.                                                                                                                              |
| Q8BXQ2 | PIGT_MOUSE GPI<br>transamidase component<br>PIG-T OS=Mus musculus<br>GN=Pigt PE=1 SV=2                                         | 5.2E-08 | 20.2  | 5.3  | 3 (3 0 0 0 0)   | Endoplasmic<br>reticulum<br>membrane; Single-<br>pass type I<br>membrane protein.                                                                                                                      |
| Q02257 | PLAK_MOUSE Junction<br>plakoglobin OS=Mus<br>musculus GN=Jup PE=1<br>SV=3                                                      | 1.2E-11 | 100.2 | 16.5 | 15 (15 0 0 0 0) | Cell junction $\hat{\epsilon}^{\circ}$<br>adherens junction.<br>Cell junction $\hat{\epsilon}^{\circ}$<br>desmosome.<br>Cytoplasm $\hat{\epsilon}^{\circ}$<br>cytoskeleton.<br>Membrane;<br>Peripheral |

|        |                                                                                                                  |         |       |      |                 |                                                                                                                                                                                    |
|--------|------------------------------------------------------------------------------------------------------------------|---------|-------|------|-----------------|------------------------------------------------------------------------------------------------------------------------------------------------------------------------------------|
|        |                                                                                                                  |         |       |      |                 | membrane protein.                                                                                                                                                                  |
| Q8K2J0 | PLCD3_MOUSE 1-phosphatidylinositol-4,5-bisphosphate phosphodiesterase delta-3 OS=Mus musculus GN=Plcd3 PE=1 SV=2 | 1.2E-05 | 40.2  | 6.1  | 4 (4 0 0 0 0)   | Membrane; Peripheral membrane protein. Cytoplasm. Cleavage furrow.                                                                                                                 |
| Q9QXS1 | PLEC1_MOUSE Plectin-1 OS=Mus musculus GN=Plec1 PE=1 SV=2                                                         | 8.5E-14 | 450.2 | 10.8 | 67 (67 0 0 0 0) | Cytoplasm $\hat{\epsilon}^{\circ}$ cytoskeleton. Cell junction $\hat{\epsilon}^{\circ}$ hemidesmosome.                                                                             |
| Q07832 | PLK1_MOUSE Serine/threonine-protein kinase PLK1 OS=Mus musculus GN=Plk1 PE=2 SV=2                                | 5.8E-07 | 40.2  | 7.6  | 4 (4 0 0 0 0)   | Nucleus. Chromosome $\hat{\epsilon}^{\circ}$ centromere $\hat{\epsilon}^{\circ}$ kinetochore. Cytoplasm $\hat{\epsilon}^{\circ}$ cytoskeleton $\hat{\epsilon}^{\circ}$ centrosome. |
| Q9R0E1 | PLOD3_MOUSE Procollagen-lysine,2-oxoglutarate 5-dioxygenase 3 OS=Mus musculus GN=Plod3 PE=1 SV=1                 | 5.5E-06 | 30.2  | 5.8  | 4 (4 0 0 0 0)   | Rough endoplasmic reticulum membrane; Peripheral membrane protein; Luminal side.                                                                                                   |
| Q3TRM4 | PLPL6_MOUSE Neuropathy target esterase OS=Mus musculus GN=Pnpla6 PE=2 SV=2                                       | 1.2E-07 | 30.2  | 3.2  | 3 (3 0 0 0 0)   | Endoplasmic reticulum membrane; Single-pass type I membrane protein; Cytoplasmic side.                                                                                             |
| Q9JJ00 | PLS1_MOUSE Phospholipid scramblase 1 OS=Mus musculus GN=Plscr1 PE=2 SV=1                                         | 2.7E-06 | 20.1  | 6.1  | 3 (3 0 0 0 0)   | Membrane; Single-pass type II membrane protein.                                                                                                                                    |
| Q9JIZ9 | PLS3_MOUSE Phospholipid scramblase 3 OS=Mus musculus GN=Plscr3 PE=2 SV=1                                         | 3.9E-13 | 30.3  | 11.1 | 6 (6 0 0 0 0)   | Membrane; Single-pass type II membrane protein.                                                                                                                                    |
| P70206 | PLXA1_MOUSE Plexin-A1 OS=Mus musculus GN=Plxna1 PE=1 SV=1                                                        | 4.9E-10 | 50.2  | 3.1  | 5 (5 0 0 0 0)   | Membrane; Single-pass type I membrane protein.                                                                                                                                     |
| P70207 | PLXA2_MOUSE Plexin-A2 OS=Mus musculus GN=Plxna2 PE=1 SV=2                                                        | 6.8E-09 | 20.1  | 1.1  | 2 (2 0 0 0 0)   | Membrane; Single-pass type I membrane protein.                                                                                                                                     |
| P62137 | PP1A_MOUSE Serine/threonine-protein phosphatase PP1-alpha catalytic subunit OS=Mus musculus GN=Ppp1ca PE=1 SV=1  | 8.5E-08 | 30.2  | 11.8 | 3 (3 0 0 0 0)   | Cytoplasm. Nucleus. Nucleus $\hat{\epsilon}^{\circ}$ nucleoplasm. Nucleus $\hat{\epsilon}^{\circ}$ nucleolus.                                                                      |

*A novel role of mitochondria in muscle injury*

|        |                                                                                           |         |       |      |                 |                                                                                                   |
|--------|-------------------------------------------------------------------------------------------|---------|-------|------|-----------------|---------------------------------------------------------------------------------------------------|
| P17742 | PPIA_MOUSE Peptidyl-prolyl cis-trans isomerase A OS=Mus musculus GN=Ppia PE=1 SV=2        | 9.0E-10 | 50.2  | 20.7 | 8 (8 0 0 0 0)   | Cytoplasm.                                                                                        |
| P24369 | PPIB_MOUSE Peptidyl-prolyl cis-trans isomerase B OS=Mus musculus GN=Ppib PE=2 SV=2        | 2.2E-12 | 130.2 | 47.2 | 19 (19 0 0 0 0) | Endoplasmic reticulum lumen. Melanosome.                                                          |
| P30412 | PPIC_MOUSE Peptidyl-prolyl cis-trans isomerase C OS=Mus musculus GN=Ppic PE=1 SV=1        | 1.0E-10 | 50.2  | 22.6 | 7 (7 0 0 0 0)   | Cytoplasm.                                                                                        |
| Q9JIG8 | PRAF2_MOUSE PRA1 family protein 2 OS=Mus musculus GN=Praf2 PE=2 SV=1                      | 2.8E-10 | 30.3  | 16.3 | 6 (6 0 0 0 0)   | Endosome membrane; Multi-pass membrane protein.                                                   |
| Q8R5J9 | PRAF3_MOUSE PRA1 family protein 3 OS=Mus musculus GN=Arl6ip5 PE=1 SV=2                    | 1.1E-14 | 50.4  | 16.5 | 13 (13 0 0 0 0) | Endoplasmic reticulum membrane; Multi-pass membrane protein. Cytoplasm. Cytoplasmic cytoskeleton. |
| P35700 | PRDX1_MOUSE Peroxiredoxin-1 OS=Mus musculus GN=Prdx1 PE=1 SV=1                            | 9.7E-08 | 58.2  | 33.7 | 9 (6 3 0 0 0)   | Cytoplasm. Melanosome.                                                                            |
| Q61171 | PRDX2_MOUSE Peroxiredoxin-2 OS=Mus musculus GN=Prdx2 PE=1 SV=3                            | 1.5E-07 | 30.2  | 19.2 | 3 (3 0 0 0 0)   | Cytoplasm.                                                                                        |
| O08807 | PRDX4_MOUSE Peroxiredoxin-4 OS=Mus musculus GN=Prdx4 PE=1 SV=1                            | 4.2E-09 | 40.2  | 17.2 | 4 (4 0 0 0 0)   | Cytoplasm. Secreted.                                                                              |
| P99029 | PRDX5_MOUSE Peroxiredoxin-5, mitochondrial OS=Mus musculus GN=Prdx5 PE=1 SV=2             | 2.9E-10 | 30.2  | 18.6 | 3 (3 0 0 0 0)   | Mitochondrion. Cytoplasm. Peroxisome.                                                             |
| Q9WUQ2 | PREB_MOUSE Prolactin regulatory element-binding protein OS=Mus musculus GN=Preb PE=1 SV=1 | 1.6E-06 | 30.2  | 9.4  | 3 (3 0 0 0 0)   | Nucleus. Membrane; Single-pass membrane protein. Endoplasmic reticulum.                           |
| P62334 | PRS10_MOUSE 26S protease regulatory subunit S10B OS=Mus musculus GN=Psmc6 PE=1 SV=1       | 2.0E-08 | 40.2  | 13.9 | 4 (4 0 0 0 0)   | Cytoplasm. Nucleus.                                                                               |
| P62192 | PRS4_MOUSE 26S protease regulatory subunit 4 OS=Mus musculus GN=Psmc1 PE=1 SV=1           | 9.4E-13 | 108.3 | 32.3 | 11 (10 1 0 0 0) | Cytoplasm. Nucleus.                                                                               |

|        |                                                                                                |         |      |      |               |                     |
|--------|------------------------------------------------------------------------------------------------|---------|------|------|---------------|---------------------|
| O88685 | PRS6A_MOUSE 26S protease regulatory subunit 6A OS=Mus musculus GN=Psmc3 PE=2 SV=1              | 7.5E-09 | 60.2 | 19.9 | 7 (7 0 0 0 0) | Cytoplasm. Nucleus. |
| P54775 | PRS6B_MOUSE 26S protease regulatory subunit 6B OS=Mus musculus GN=Psmc4 PE=1 SV=1              | 1.0E-30 | 60.4 | 25.4 | 7 (7 0 0 0 0) | Cytoplasm. Nucleus. |
| P46471 | PRS7_MOUSE 26S protease regulatory subunit 7 OS=Mus musculus GN=Psmc2 PE=1 SV=5                | 8.0E-10 | 58.3 | 18.9 | 8 (7 1 0 0 0) | Cytoplasm. Nucleus. |
| P62196 | PRS8_MOUSE 26S protease regulatory subunit 8 OS=Mus musculus GN=Psmc5 PE=1 SV=1                | 2.2E-08 | 80.2 | 24.4 | 8 (8 0 0 0 0) | Cytoplasm. Nucleus. |
| Q11011 | PSA_MOUSE Puromycin-sensitive aminopeptidase OS=Mus musculus GN=Npepps PE=1 SV=1               | 7.6E-08 | 20.2 | 2.5  | 2 (2 0 0 0 0) | Cytoplasm. Nucleus. |
| P49722 | PSA2_MOUSE Proteasome subunit alpha type-2 OS=Mus musculus GN=Psm2 PE=1 SV=2                   | 1.1E-07 | 20.2 | 13.2 | 3 (3 0 0 0 0) | Cytoplasm. Nucleus. |
| O70435 | PSA3_MOUSE Proteasome subunit alpha type-3 OS=Mus musculus GN=Psm3 PE=1 SV=3                   | 2.0E-08 | 30.2 | 14.1 | 3 (3 0 0 0 0) | Cytoplasm. Nucleus. |
| Q9Z2U1 | PSA5_MOUSE Proteasome subunit alpha type-5 OS=Mus musculus GN=Psm5 PE=1 SV=1                   | 2.2E-10 | 30.2 | 14.9 | 3 (3 0 0 0 0) | Cytoplasm. Nucleus. |
| Q9Z2U0 | PSA7_MOUSE Proteasome subunit alpha type-7 OS=Mus musculus GN=Psm7 PE=1 SV=1                   | 5.4E-07 | 20.2 | 10.5 | 2 (2 0 0 0 0) | Cytoplasm. Nucleus. |
| Q9CWH6 | PSA7L_MOUSE Proteasome subunit alpha type-7-like OS=Mus musculus GN=Psm8 PE=2 SV=1             | 7.2E-06 | 20.1 | 11.2 | 2 (2 0 0 0 0) | Cytoplasm. Nucleus. |
| O35955 | PSB10_MOUSE Proteasome subunit beta type-10 OS=Mus musculus GN=Psm10 PE=2 SV=1                 | 8.9E-15 | 20.3 | 14.7 | 3 (3 0 0 0 0) | Cytoplasm. Nucleus. |
| Q9R1P3 | PSB2_MOUSE Proteasome subunit beta type-2 OS=Mus musculus GN=Psm2 PE=1 SV=1                    | 4.9E-10 | 20.2 | 13.9 | 2 (2 0 0 0 0) | Cytoplasm. Nucleus. |
| Q9D8W5 | PSD12_MOUSE 26S proteasome non-ATPase regulatory subunit 12 OS=Mus musculus GN=Psm12 PE=2 SV=3 | 8.9E-08 | 20.2 | 5.0  | 2 (2 0 0 0 0) | ND                  |

|        |                                                                                                    |         |      |      |                 |                                                                                                                                   |
|--------|----------------------------------------------------------------------------------------------------|---------|------|------|-----------------|-----------------------------------------------------------------------------------------------------------------------------------|
| P26516 | PSD7_MOUSE 26S proteasome non-ATPase regulatory subunit 7<br>OS=Mus musculus<br>GN=Psm7 PE=1 SV=2  | 2.9E-07 | 50.2 | 18.4 | 5 (5 0 0 0 0)   | ND                                                                                                                                |
| Q3TXS7 | PSMD1_MOUSE 26S proteasome non-ATPase regulatory subunit 1<br>OS=Mus musculus<br>GN=Psm1 PE=1 SV=1 | 2.0E-06 | 20.1 | 2.5  | 4 (4 0 0 0 0)   | ND                                                                                                                                |
| Q8VDM4 | PSMD2_MOUSE 26S proteasome non-ATPase regulatory subunit 2<br>OS=Mus musculus<br>GN=Psm2 PE=1 SV=1 | 3.2E-05 | 20.2 | 3.4  | 2 (2 0 0 0 0)   | ND                                                                                                                                |
| P14685 | PSMD3_MOUSE 26S proteasome non-ATPase regulatory subunit 3<br>OS=Mus musculus<br>GN=Psm3 PE=2 SV=2 | 6.6E-07 | 30.2 | 4.5  | 3 (3 0 0 0 0)   | ND                                                                                                                                |
| P97372 | PSME2_MOUSE Proteasome activator complex subunit 2<br>OS=Mus musculus GN=Psm2 PE=2 SV=4            | 2.5E-11 | 30.2 | 17.2 | 3 (3 0 0 0 0)   | ND                                                                                                                                |
| P49769 | PSN1_MOUSE Presenilin-1<br>OS=Mus musculus<br>GN=Psen1 PE=1 SV=1                                   | 2.4E-13 | 60.3 | 12.6 | 7 (7 0 0 0 0)   | Endoplasmic reticulum membrane; Multi-pass membrane protein. Golgi apparatus membrane; Multi-pass membrane protein. Cell surface. |
| Q8R2Y8 | PTH2_MOUSE Peptidyl-tRNA hydrolase 2, mitochondrial<br>OS=Mus musculus GN=Pth2 PE=2 SV=1           | 8.9E-13 | 20.2 | 16.0 | 5 (5 0 0 0 0)   | Mitochondrion.                                                                                                                    |
| Q8BKG3 | PTK7_MOUSE Tyrosine-protein kinase-like 7<br>OS=Mus musculus GN=Ptk7 PE=1 SV=1                     | 2.2E-15 | 90.2 | 9.4  | 14 (14 0 0 0 0) | Membrane; Single-pass type I membrane protein. Cell junction.                                                                     |
| P18052 | PTPRA_MOUSE Receptor-type tyrosine-protein phosphatase alpha<br>OS=Mus musculus GN=Ptpa PE=1 SV=2  | 5.3E-09 | 60.3 | 8.0  | 7 (7 0 0 0 0)   | Membrane; Single-pass type I membrane protein.                                                                                    |
| O54724 | PTRF_MOUSE Polymerase I and transcript release factor<br>OS=Mus musculus GN=Ptrf PE=1 SV=1         | 3.2E-12 | 40.3 | 15.6 | 4 (4 0 0 0 0)   | Membrane caveola. Cell membrane. Microsome. Endoplasmic reticulum.                                                                |

|        |                                                                                                   |         |       |      |                 |                                                                                                                                                                                           |
|--------|---------------------------------------------------------------------------------------------------|---------|-------|------|-----------------|-------------------------------------------------------------------------------------------------------------------------------------------------------------------------------------------|
|        |                                                                                                   |         |       |      |                 | Cytoplasm<br>cytosol.<br>Mitochondrion.<br>Nucleus.                                                                                                                                       |
| P32507 | PVRL2_MOUSE Poliovirus receptor-related protein 2<br>OS=Mus musculus<br>GN=Pvrl2 PE=1 SV=2        | 7.2E-10 | 30.2  | 10.6 | 5 (5 0 0 0 0)   | Cell membrane;<br>Single-pass type I membrane protein.                                                                                                                                    |
| O35435 | PYRD_MOUSE Dihydroorotate dehydrogenase, mitochondrial<br>OS=Mus musculus GN=Dhodh PE=2 SV=2      | 1.3E-05 | 30.1  | 8.4  | 3 (3 0 0 0 0)   | Mitochondrion inner membrane;<br>Single-pass membrane protein.                                                                                                                            |
| P70698 | PYRG1_MOUSE CTP synthase 1<br>OS=Mus musculus GN=Ctps PE=1 SV=2                                   | 4.9E-12 | 30.3  | 8.5  | 4 (4 0 0 0 0)   | ND                                                                                                                                                                                        |
| Q9CZ13 | QCR1_MOUSE Cytochrome b-c1 complex subunit 1, mitochondrial<br>OS=Mus musculus GN=Uqrc1 PE=1 SV=1 | 1.0E-30 | 60.3  | 12.9 | 6 (6 0 0 0 0)   | Mitochondrion inner membrane.                                                                                                                                                             |
| Q9DB77 | QCR2_MOUSE Cytochrome b-c1 complex subunit 2, mitochondrial<br>OS=Mus musculus GN=Uqrc2 PE=1 SV=1 | 6.2E-13 | 70.2  | 21.6 | 10 (10 0 0 0 0) | Mitochondrion inner membrane;<br>Peripheral membrane protein;<br>Matrix side.                                                                                                             |
| Q9D855 | QCR7_MOUSE Cytochrome b-c1 complex subunit 7<br>OS=Mus musculus GN=Uqcrb PE=1 SV=3                | 1.4E-10 | 20.2  | 22.5 | 2 (2 0 0 0 0)   | Mitochondrion inner membrane.                                                                                                                                                             |
| Q3TMX7 | QSOX2_MOUSE Sulfhydryl oxidase 2<br>OS=Mus musculus GN=Qsox2 PE=2 SV=1                            | 3.2E-09 | 30.2  | 6.1  | 5 (5 0 0 0 0)   | Membrane; Single-pass membrane protein.                                                                                                                                                   |
| P61027 | RAB10_MOUSE Ras-related protein Rab-10<br>OS=Mus musculus GN=Rab10 PE=1 SV=1                      | 8.9E-15 | 68.3  | 40.5 | 22 (11 4 1 6 0) | Cell membrane;<br>Lipid-anchor;<br>Cytoplasmic side.                                                                                                                                      |
| P35283 | RAB12_MOUSE Ras-related protein Rab-12<br>OS=Mus musculus GN=Rab12 PE=1 SV=3                      | 1.1E-05 | 20.2  | 8.2  | 2 (2 0 0 0 0)   | Golgi apparatus membrane; Lipid-anchor.                                                                                                                                                   |
| Q91V41 | RAB14_MOUSE Ras-related protein Rab-14<br>OS=Mus musculus GN=Rab14 PE=1 SV=3                      | 1.3E-12 | 100.3 | 51.6 | 17 (17 0 0 0 0) | Early endosome membrane; Lipid-anchor;<br>Cytoplasmic side.<br>Golgi apparatus membrane; Lipid-anchor;<br>Cytoplasmic side.<br>Golgi apparatus<br>trans-Golgi network<br>membrane; Lipid- |

|        |                                                                           |         |       |      |                 |                                                                                                                                                                                |
|--------|---------------------------------------------------------------------------|---------|-------|------|-----------------|--------------------------------------------------------------------------------------------------------------------------------------------------------------------------------|
|        |                                                                           |         |       |      |                 | anchor;<br>Cytoplasmic side.                                                                                                                                                   |
| P35293 | RAB18_MOUSE Ras-related protein Rab-18 OS=Mus musculus GN=Rab18 PE=2 SV=2 | 2.7E-10 | 70.2  | 34.0 | 8 (8 0 0 0 0)   | Apical cell membrane; Lipid-anchor. Basal cell membrane; Lipid-anchor.                                                                                                         |
| P62821 | RAB1A_MOUSE Ras-related protein Rab-1A OS=Mus musculus GN=Rab1A PE=1 SV=3 | 2.2E-12 | 110.3 | 34.1 | 32 (20 7 5 0 0) | Golgi apparatus. Endoplasmic reticulum.                                                                                                                                        |
| Q9D1G1 | RAB1B_MOUSE Ras-related protein Rab-1B OS=Mus musculus GN=Rab1b PE=1 SV=1 | 3.4E-12 | 100.3 | 27.9 | 28 (12 7 9 0 0) | Membrane; Lipid-anchor; Cytoplasmic side. Cytoplasm.                                                                                                                           |
| P35282 | RAB21_MOUSE Ras-related protein Rab-21 OS=Mus musculus GN=Rab21 PE=1 SV=4 | 7.8E-15 | 60.3  | 27.9 | 7 (7 0 0 0 0)   | Endoplasmic reticulum membrane; Lipid-anchor. Golgi apparatus membrane. Early endosome membrane. Cytoplasmic vesicle membrane.                                                 |
| P35288 | RAB23_MOUSE Ras-related protein Rab-23 OS=Mus musculus GN=Rab23 PE=1 SV=2 | 3.5E-09 | 30.3  | 18.1 | 3 (3 0 0 0 0)   | Cell membrane; Lipid-anchor; Cytoplasmic side.                                                                                                                                 |
| P53994 | RAB2A_MOUSE Ras-related protein Rab-2A OS=Mus musculus GN=Rab2a PE=1 SV=1 | 3.2E-10 | 90.3  | 43.4 | 14 (14 0 0 0 0) | Endoplasmic reticulum-Golgi intermediate compartment membrane; Lipid-anchor. Melanosome. Endoplasmic reticulum membrane; Lipid-anchor. Golgi apparatus membrane; Lipid-anchor. |
| Q921E2 | RAB31_MOUSE Ras-related protein Rab-31 OS=Mus musculus GN=Rab31 PE=1 SV=1 | 2.2E-12 | 80.2  | 53.1 | 16 (16 0 0 0 0) | Cell membrane; Lipid-anchor; Cytoplasmic side.                                                                                                                                 |
| Q64008 | RAB34_MOUSE Ras-related protein Rab-34 OS=Mus musculus GN=Rab34 PE=1 SV=2 | 3.9E-09 | 30.2  | 17.0 | 3 (3 0 0 0 0)   | Cytoplasm. Golgi apparatus.                                                                                                                                                    |

*A novel role of mitochondria in muscle injury*

|        |                                                                           |         |       |      |                 |                                                                                                                                                                                                   |
|--------|---------------------------------------------------------------------------|---------|-------|------|-----------------|---------------------------------------------------------------------------------------------------------------------------------------------------------------------------------------------------|
| Q6PHN9 | RAB35_MOUSE Ras-related protein Rab-35 OS=Mus musculus GN=Rab35 PE=1 SV=1 | 1.0E-12 | 50.2  | 23.9 | 10 (10 0 0 0 0) | Cell membrane; Lipid-anchor; Cytoplasmic side. Membrane $\hat{\epsilon}^{\circ}$ clathrin-coated pit. Cytoplasmic vesicle $\hat{\epsilon}^{\circ}$ clathrin-coated vesicle. Endosome. Melanosome. |
| Q9CQD1 | RAB5A_MOUSE Ras-related protein Rab-5A OS=Mus musculus GN=Rab5a PE=1 SV=1 | 1.0E-30 | 86.3  | 44.2 | 15 (12 3 0 0 0) | Cell membrane; Lipid-anchor; Cytoplasmic side. Early endosome membrane; Lipid-anchor. Melanosome.                                                                                                 |
| P61021 | RAB5B_MOUSE Ras-related protein Rab-5B OS=Mus musculus GN=Rab5b PE=1 SV=1 | 6.2E-14 | 40.3  | 26.5 | 6 (6 0 0 0 0)   | Cell membrane; Lipid-anchor; Cytoplasmic side. Early endosome membrane; Lipid-anchor. Melanosome.                                                                                                 |
| P35278 | RAB5C_MOUSE Ras-related protein Rab-5C OS=Mus musculus GN=Rab5c PE=1 SV=2 | 8.9E-15 | 128.3 | 56.0 | 20 (19 1 0 0 0) | Cell membrane; Lipid-anchor; Cytoplasmic side. Early endosome membrane; Lipid-anchor. Melanosome.                                                                                                 |
| P35279 | RAB6A_MOUSE Ras-related protein Rab-6A OS=Mus musculus GN=Rab6a PE=1 SV=4 | 1.9E-10 | 70.2  | 34.1 | 10 (10 0 0 0 0) | Golgi apparatus membrane; Lipid-anchor.                                                                                                                                                           |
| P51150 | RAB7A_MOUSE Ras-related protein Rab-7a OS=Mus musculus GN=Rab7a PE=1 SV=2 | 6.0E-10 | 120.2 | 55.6 | 28 (28 0 0 0 0) | Late endosome. Lysosome. Cytoplasmic vesicle $\hat{\epsilon}^{\circ}$ phagosome. Melanosome.                                                                                                      |
| P55258 | RAB8A_MOUSE Ras-related protein Rab-8A OS=Mus musculus GN=Rab8a PE=1 SV=2 | 7.1E-08 | 40.2  | 19.8 | 5 (5 0 0 0 0)   | Cell membrane; Lipid-anchor; Cytoplasmic side. Golgi apparatus. Cytoplasm $\hat{\epsilon}^{\circ}$ perinuclear region. Cell projection.                                                           |
| P61028 | RAB8B_MOUSE Ras-related protein Rab-8B OS=Mus musculus GN=Rab8b PE=1 SV=1 | 3.2E-10 | 20.2  | 6.8  | 2 (2 0 0 0 0)   | Cell membrane; Lipid-anchor; Cytoplasmic side.                                                                                                                                                    |
| P63001 | RAC1_MOUSE Ras-related C3 botulinum toxin substrate 1 OS=Mus musculus     | 3.2E-11 | 60.3  | 22.9 | 11 (11 0 0 0 0) | Cell membrane; Lipid-anchor; Cytoplasmic side.                                                                                                                                                    |



|        |                                                                                       |         |      |      |                 |                                                                                                |
|--------|---------------------------------------------------------------------------------------|---------|------|------|-----------------|------------------------------------------------------------------------------------------------|
|        | GN=Rac1 PE=1 SV=1                                                                     |         |      |      |                 | Melanosome.                                                                                    |
| P63321 | RALA_MOUSE Ras-related protein Ral-A OS=Mus musculus GN=Rala PE=1 SV=1                | 4.1E-12 | 90.3 | 30.6 | 13 (13 0 0 0 0) | Cell surface. Cell membrane; Lipid-anchor; Cytoplasmic side. Cleavage furrow. Midbody.         |
| Q9JIW9 | RALB_MOUSE Ras-related protein Ral-B OS=Mus musculus GN=Ralb PE=2 SV=1                | 3.1E-12 | 60.3 | 25.2 | 11 (11 0 0 0 0) | Cell membrane; Lipid-anchor; Cytoplasmic side.                                                 |
| P62827 | RAN_MOUSE GTP-binding nuclear protein Ran OS=Mus musculus GN=Ran PE=1 SV=3            | 6.8E-07 | 30.2 | 11.6 | 3 (3 0 0 0 0)   | Nucleus. Cytoplasm. Melanosome.                                                                |
| P34022 | RANG_MOUSE Ran-specific GTPase-activating protein OS=Mus musculus GN=Ranbp1 PE=1 SV=2 | 1.0E-07 | 40.2 | 20.7 | 4 (4 0 0 0 0)   | ND                                                                                             |
| P62835 | RAP1A_MOUSE Ras-related protein Rap-1A OS=Mus musculus GN=Rap1a PE=2 SV=1             | 3.5E-08 | 60.3 | 28.3 | 10 (10 0 0 0 0) | Cell membrane; Lipid-anchor.                                                                   |
| Q99JI6 | RAP1B_MOUSE Ras-related protein Rap-1b OS=Mus musculus GN=Rap1b PE=2 SV=2             | 1.2E-09 | 20.3 | 8.2  | 3 (3 0 0 0 0)   | Cell membrane. Cytoplasmic cytosol. Cell junction.                                             |
| Q80ZJ1 | RAP2A_MOUSE Ras-related protein Rap-2a OS=Mus musculus GN=Rap2a PE=1 SV=2             | 6.8E-10 | 30.2 | 29.0 | 3 (3 0 0 0 0)   | Recycling endosome membrane; Lipid-anchor; Cytoplasmic side.                                   |
| P61226 | RAP2B_MOUSE Ras-related protein Rap-2b OS=Mus musculus GN=Rap2b PE=1 SV=1             | 4.9E-11 | 40.2 | 15.3 | 4 (4 0 0 0 0)   | Recycling endosome membrane; Lipid-anchor; Cytoplasmic side.                                   |
| Q8BU31 | RAP2C_MOUSE Ras-related protein Rap-2c OS=Mus musculus GN=Rap2c PE=1 SV=1             | 7.7E-13 | 20.2 | 8.7  | 3 (3 0 0 0 0)   | Cytoplasm. Recycling endosome membrane; Lipid-anchor; Cytoplasmic side.                        |
| Q60790 | RASA3_MOUSE Ras GTPase-activating protein 3 OS=Mus musculus GN=Rasa3 PE=1 SV=1        | 2.2E-07 | 50.2 | 6.4  | 5 (5 0 0 0 0)   | ND                                                                                             |
| Q61411 | RASH_MOUSE GTPase HRas OS=Mus musculus GN=Hras1 PE=1 SV=1                             | 6.9E-09 | 40.2 | 21.2 | 6 (6 0 0 0 0)   | Cell membrane. Cell membrane; Lipid-anchor; Cytoplasmic side. Golgi apparatus. Golgi apparatus |

*A novel role of mitochondria in muscle injury*

|        |                                                                                                        |         |      |      |                 |                                                                                                       |
|--------|--------------------------------------------------------------------------------------------------------|---------|------|------|-----------------|-------------------------------------------------------------------------------------------------------|
|        |                                                                                                        |         |      |      |                 | membrane; Lipid-anchor.                                                                               |
| P62492 | RB11A_MOUSE Ras-related protein Rab-11A OS=Mus musculus GN=Rab11a PE=1 SV=3                            | 8.5E-09 | 90.2 | 32.4 | 19 (19 0 0 0 0) | Cell membrane; Peripheral membrane protein. Recycling endosome membrane; Peripheral membrane protein. |
| Q8BMG7 | RBGPR_MOUSE Rab3 GTPase-activating protein non-catalytic subunit OS=Mus musculus GN=Rab3gap2 PE=1 SV=2 | 5.7E-09 | 20.2 | 1.7  | 2 (2 0 0 0 0)   | Cytoplasm.                                                                                            |
| Q05186 | RCN1_MOUSE Reticulocalbin-1 OS=Mus musculus GN=Rcn1 PE=1 SV=1                                          | 2.1E-07 | 40.2 | 15.7 | 5 (5 0 0 0 0)   | Endoplasmic reticulum lumen.                                                                          |
| Q8BP92 | RCN2_MOUSE Reticulocalbin-2 OS=Mus musculus GN=Rcn2 PE=2 SV=1                                          | 1.0E-30 | 20.3 | 8.4  | 2 (2 0 0 0 0)   | Endoplasmic reticulum lumen.                                                                          |
| Q8BH97 | RCN3_MOUSE Reticulocalbin-3 OS=Mus musculus GN=Rcn3 PE=2 SV=1                                          | 7.4E-11 | 50.2 | 15.5 | 5 (5 0 0 0 0)   | Endoplasmic reticulum lumen.                                                                          |
| Q9QYF1 | RDH11_MOUSE Retinol dehydrogenase 11 OS=Mus musculus GN=Rdh11 PE=2 SV=2                                | 1.7E-10 | 30.2 | 11.7 | 3 (3 0 0 0 0)   | Endoplasmic reticulum membrane; Single-pass type II membrane protein.                                 |
| Q60870 | REEP5_MOUSE Receptor expression-enhancing protein 5 OS=Mus musculus GN=Reep5 PE=1 SV=1                 | 3.4E-08 | 20.1 | 10.8 | 6 (6 0 0 0 0)   | Membrane; Multi-pass membrane protein.                                                                |
| Q9CQU3 | RER1_MOUSE Protein RER1 OS=Mus musculus GN=Rer1 PE=1 SV=1                                              | 5.3E-11 | 20.3 | 14.8 | 2 (2 0 0 0 0)   | Golgi apparatus membrane; Multi-pass membrane protein.                                                |
| Q8CHX7 | RFTN2_MOUSE Raftlin-2 OS=Mus musculus GN=Rftn2 PE=2 SV=3                                               | 8.0E-11 | 30.2 | 7.2  | 3 (3 0 0 0 0)   | Cell membrane; Lipid-anchor.                                                                          |
| Q9WVM1 | RGAP1_MOUSE Rac GTPase-activating protein 1 OS=Mus musculus GN=Racgap1 PE=2 SV=1                       | 2.2E-08 | 40.2 | 7.2  | 7 (7 0 0 0 0)   | Nucleus. Cytoplasm. Cytoplasmic cytoskeleton spindle. Cytoplasmic vesicle secretory vesicle acrosome. |

|        |                                                                                                             |         |       |      |                    |                                                                                   |
|--------|-------------------------------------------------------------------------------------------------------------|---------|-------|------|--------------------|-----------------------------------------------------------------------------------|
| Q9QUI0 | RHOA_MOUSE<br>Transforming protein RhoA<br>OS=Mus musculus<br>GN=Rhoa PE=1 SV=1                             | 5.6E-13 | 60.3  | 25.9 | 10 (10 0 0 0<br>0) | Cell membrane;<br>Lipid-anchor;<br>Cytoplasmic side.<br>Cytoplasmic cytoskeleton. |
| P84096 | RHOG_MOUSE Rho-related<br>GTP-binding protein RhoG<br>OS=Mus musculus<br>GN=Rhog PE=2 SV=1                  | 4.3E-14 | 50.2  | 34.0 | 7 (7 0 0 0 0)      | Cell membrane;<br>Lipid-anchor;<br>Cytoplasmic side.                              |
| P07742 | RIR1_MOUSE<br>Ribonucleoside-diphosphate<br>reductase large subunit<br>OS=Mus musculus<br>GN=Rrm1 PE=2 SV=1 | 8.5E-11 | 40.2  | 6.7  | 5 (5 0 0 0 0)      | Cytoplasm.                                                                        |
| Q6ZWW3 | RL10_MOUSE 60S<br>ribosomal protein L10<br>OS=Mus musculus<br>GN=Rpl10 PE=2 SV=3                            | 9.3E-11 | 30.2  | 6.5  | 6 (6 0 0 0 0)      | ND                                                                                |
| P53026 | RL10A_MOUSE 60S<br>ribosomal protein L10a<br>OS=Mus musculus<br>GN=Rpl10a PE=1 SV=3                         | 2.7E-10 | 20.2  | 12.4 | 4 (4 0 0 0 0)      | ND                                                                                |
| P86048 | RL10L_MOUSE 60S<br>ribosomal protein L10-like<br>OS=Mus musculus<br>GN=Rpl10l PE=2 SV=1                     | 1.5E-08 | 80.2  | 17.8 | 14 (14 0 0 0<br>0) | ND                                                                                |
| Q9CXW4 | RL11_MOUSE 60S<br>ribosomal protein L11<br>OS=Mus musculus<br>GN=Rpl11 PE=1 SV=4                            | 1.4E-10 | 30.2  | 15.7 | 3 (3 0 0 0 0)      | Nucleus nucleolus.                                                                |
| P35979 | RL12_MOUSE 60S<br>ribosomal protein L12<br>OS=Mus musculus<br>GN=Rpl12 PE=1 SV=2                            | 1.0E-12 | 30.3  | 24.2 | 7 (7 0 0 0 0)      | ND                                                                                |
| P47963 | RL13_MOUSE 60S<br>ribosomal protein L13<br>OS=Mus musculus<br>GN=Rpl13 PE=2 SV=3                            | 5.0E-11 | 110.2 | 38.9 | 27 (27 0 0 0<br>0) | ND                                                                                |
| P19253 | RL13A_MOUSE 60S<br>ribosomal protein L13a<br>OS=Mus musculus<br>GN=Rpl13a PE=1 SV=4                         | 1.2E-06 | 20.2  | 5.4  | 4 (4 0 0 0 0)      | ND                                                                                |
| Q9CR57 | RL14_MOUSE 60S<br>ribosomal protein L14<br>OS=Mus musculus<br>GN=Rpl14 PE=2 SV=3                            | 1.2E-09 | 30.2  | 17.1 | 6 (6 0 0 0 0)      | ND                                                                                |
| Q9CZM2 | RL15_MOUSE 60S<br>ribosomal protein L15<br>OS=Mus musculus<br>GN=Rpl15 PE=2 SV=4                            | 1.6E-12 | 40.2  | 16.7 | 8 (8 0 0 0 0)      | ND                                                                                |
| Q9CPR4 | RL17_MOUSE 60S<br>ribosomal protein L17<br>OS=Mus musculus<br>GN=Rpl17 PE=2 SV=3                            | 8.7E-11 | 80.3  | 27.2 | 15 (15 0 0 0<br>0) | ND                                                                                |

|        |                                                                                     |         |       |      |                    |            |
|--------|-------------------------------------------------------------------------------------|---------|-------|------|--------------------|------------|
| P35980 | RL18_MOUSE 60S<br>ribosomal protein L18<br>OS=Mus musculus<br>GN=Rpl18 PE=2 SV=3    | 3.2E-08 | 60.2  | 30.3 | 12 (12 0 0 0<br>0) | Cytoplasm. |
| P84099 | RL19_MOUSE 60S<br>ribosomal protein L19<br>OS=Mus musculus<br>GN=Rpl19 PE=1 SV=1    | 1.8E-14 | 70.3  | 22.4 | 11 (11 0 0 0<br>0) | ND         |
| O09167 | RL21_MOUSE 60S<br>ribosomal protein L21<br>OS=Mus musculus<br>GN=Rpl21 PE=2 SV=3    | 1.7E-11 | 30.2  | 16.3 | 4 (4 0 0 0 0)      | ND         |
| P62830 | RL23_MOUSE 60S<br>ribosomal protein L23<br>OS=Mus musculus<br>GN=Rpl23 PE=2 SV=1    | 1.1E-09 | 104.3 | 27.9 | 15 (12 3 0 0<br>0) | ND         |
| P62751 | RL23A_MOUSE 60S<br>ribosomal protein L23a<br>OS=Mus musculus<br>GN=Rpl23a PE=2 SV=1 | 1.3E-08 | 60.2  | 31.4 | 6 (6 0 0 0 0)      | ND         |
| Q8BP67 | RL24_MOUSE 60S<br>ribosomal protein L24<br>OS=Mus musculus<br>GN=Rpl24 PE=2 SV=2    | 3.9E-11 | 60.2  | 22.3 | 18 (18 0 0 0<br>0) | ND         |
| P61255 | RL26_MOUSE 60S<br>ribosomal protein L26<br>OS=Mus musculus<br>GN=Rpl26 PE=2 SV=1    | 2.7E-07 | 70.2  | 26.9 | 12 (12 0 0 0<br>0) | ND         |
| P61358 | RL27_MOUSE 60S<br>ribosomal protein L27<br>OS=Mus musculus<br>GN=Rpl27 PE=2 SV=2    | 2.9E-12 | 40.2  | 40.4 | 4 (4 0 0 0 0)      | ND         |
| P14115 | RL27A_MOUSE 60S<br>ribosomal protein L27a<br>OS=Mus musculus<br>GN=Rpl27a PE=2 SV=4 | 1.6E-08 | 20.2  | 16.2 | 10 (10 0 0 0<br>0) | ND         |
| P41105 | RL28_MOUSE 60S<br>ribosomal protein L28<br>OS=Mus musculus<br>GN=Rpl28 PE=1 SV=2    | 1.2E-07 | 60.2  | 23.4 | 6 (6 0 0 0 0)      | ND         |
| P47915 | RL29_MOUSE 60S<br>ribosomal protein L29<br>OS=Mus musculus<br>GN=Rpl29 PE=2 SV=2    | 6.2E-08 | 40.2  | 16.9 | 5 (5 0 0 0 0)      | ND         |
| P62900 | RL31_MOUSE 60S<br>ribosomal protein L31<br>OS=Mus musculus<br>GN=Rpl31 PE=2 SV=1    | 7.7E-08 | 30.2  | 35.2 | 3 (3 0 0 0 0)      | ND         |
| Q9D1R9 | RL34_MOUSE 60S<br>ribosomal protein L34<br>OS=Mus musculus<br>GN=Rpl34 PE=3 SV=2    | 1.0E-06 | 30.2  | 20.5 | 3 (3 0 0 0 0)      | ND         |
| Q6ZWW7 | RL35_MOUSE 60S<br>ribosomal protein L35<br>OS=Mus musculus                          | 6.1E-09 | 40.2  | 11.4 | 9 (9 0 0 0 0)      | ND         |

|        |                                                                                         |         |       |      |                 |                                 |
|--------|-----------------------------------------------------------------------------------------|---------|-------|------|-----------------|---------------------------------|
|        | GN=Rpl35 PE=2 SV=1                                                                      |         |       |      |                 |                                 |
| P47964 | RL36_MOUSE 60S ribosomal protein L36 OS=Mus musculus GN=Rpl36 PE=2 SV=2                 | 1.9E-07 | 20.1  | 8.6  | 3 (3 0 0 0 0)   | ND                              |
| P83882 | RL36A_MOUSE 60S ribosomal protein L36a OS=Mus musculus GN=Rpl36a PE=3 SV=2              | 1.8E-05 | 20.2  | 10.4 | 3 (3 0 0 0 0)   | Cytoplasm.                      |
| Q9D8E6 | RL4_MOUSE 60S ribosomal protein L4 OS=Mus musculus GN=Rpl4 PE=1 SV=3                    | 3.9E-08 | 100.2 | 26.7 | 11 (11 0 0 0 0) | ND                              |
| P47962 | RL5_MOUSE 60S ribosomal protein L5 OS=Mus musculus GN=Rpl5 PE=1 SV=3                    | 8.3E-09 | 40.2  | 15.8 | 4 (4 0 0 0 0)   | Cytoplasm. Nucleus & nucleolus. |
| P47911 | RL6_MOUSE 60S ribosomal protein L6 OS=Mus musculus GN=Rpl6 PE=1 SV=3                    | 2.2E-12 | 40.2  | 12.2 | 5 (5 0 0 0 0)   | ND                              |
| P14148 | RL7_MOUSE 60S ribosomal protein L7 OS=Mus musculus GN=Rpl7 PE=2 SV=2                    | 6.9E-09 | 70.2  | 28.5 | 9 (9 0 0 0 0)   | ND                              |
| P12970 | RL7A_MOUSE 60S ribosomal protein L7a OS=Mus musculus GN=Rpl7a PE=2 SV=2                 | 4.5E-13 | 50.3  | 18.8 | 11 (11 0 0 0 0) | ND                              |
| P62918 | RL8_MOUSE 60S ribosomal protein L8 OS=Mus musculus GN=Rpl8 PE=2 SV=2                    | 1.9E-07 | 50.2  | 15.2 | 6 (6 0 0 0 0)   | Cytoplasm.                      |
| P51410 | RL9_MOUSE 60S ribosomal protein L9 OS=Mus musculus GN=Rpl9 PE=2 SV=2                    | 1.0E-11 | 20.2  | 15.1 | 3 (3 0 0 0 0)   | ND                              |
| P14869 | RLA0_MOUSE 60S acidic ribosomal protein P0 OS=Mus musculus GN=Rplp0 PE=1 SV=3           | 1.1E-14 | 60.3  | 29.3 | 10 (10 0 0 0 0) | Nucleus. Cytoplasm.             |
| P99027 | RLA2_MOUSE 60S acidic ribosomal protein P2 OS=Mus musculus GN=Rplp2 PE=1 SV=3           | 6.2E-10 | 40.3  | 69.6 | 5 (5 0 0 0 0)   | ND                              |
| Q9DB15 | RM12_MOUSE 39S ribosomal protein L12, mitochondrial OS=Mus musculus GN=Mrpl12 PE=1 SV=2 | 3.0E-06 | 40.2  | 23.9 | 4 (4 0 0 0 0)   | Mitochondrion.                  |
| Q9CPR5 | RM15_MOUSE 39S ribosomal protein L15, mitochondrial OS=Mus                              | 1.8E-07 | 20.1  | 8.1  | 2 (2 0 0 0 0)   | Mitochondrion.                  |

|        |                                                                                                                       |         |       |      |                 |                                                                                  |
|--------|-----------------------------------------------------------------------------------------------------------------------|---------|-------|------|-----------------|----------------------------------------------------------------------------------|
|        | musculus GN=Mrpl15 PE=1 SV=1                                                                                          |         |       |      |                 |                                                                                  |
| Q99N93 | RM16_MOUSE 39S ribosomal protein L16, mitochondrial OS=Mus musculus GN=Mrpl16 PE=2 SV=1                               | 1.1E-05 | 20.1  | 10.4 | 2 (2 0 0 0 0)   | Mitochondrion.                                                                   |
| Q91YQ5 | RPN1_MOUSE Dolichyl-diphosphooligosaccharide--protein glycosyltransferase subunit 1 OS=Mus musculus GN=Rpn1 PE=2 SV=1 | 5.6E-15 | 200.3 | 42.1 | 43 (43 0 0 0 0) | Endoplasmic reticulum membrane; Single-pass type I membrane protein. Melanosome. |
| Q9DBG6 | RPN2_MOUSE Dolichyl-diphosphooligosaccharide--protein glycosyltransferase subunit 2 OS=Mus musculus GN=Rpn2 PE=2 SV=1 | 1.0E-30 | 150.3 | 30.9 | 34 (34 0 0 0 0) | Endoplasmic reticulum membrane; Multi-pass membrane protein.                     |
| P10833 | RRAS_MOUSE Ras-related protein R-Ras OS=Mus musculus GN=Rras PE=2 SV=1                                                | 2.8E-14 | 60.3  | 28.9 | 8 (8 0 0 0 0)   | Cell membrane; Lipid-anchor; Cytoplasmic side.                                   |
| P62071 | RRAS2_MOUSE Ras-related protein R-Ras2 OS=Mus musculus GN=Rras2 PE=1 SV=1                                             | 7.7E-13 | 140.3 | 40.2 | 30 (30 0 0 0 0) | Cell membrane; Lipid-anchor; Cytoplasmic side.                                   |
| P63325 | RS10_MOUSE 40S ribosomal protein S10 OS=Mus musculus GN=Rps10 PE=1 SV=1                                               | 4.8E-07 | 20.1  | 8.5  | 2 (2 0 0 0 0)   | Cytoplasm. Nucleus â€° nucleolus.                                                |
| P62281 | RS11_MOUSE 40S ribosomal protein S11 OS=Mus musculus GN=Rps11 PE=2 SV=3                                               | 6.8E-10 | 40.2  | 15.8 | 4 (4 0 0 0 0)   | ND                                                                               |
| P62301 | RS13_MOUSE 40S ribosomal protein S13 OS=Mus musculus GN=Rps13 PE=1 SV=2                                               | 1.2E-11 | 90.2  | 52.3 | 13 (13 0 0 0 0) | ND                                                                               |
| P62264 | RS14_MOUSE 40S ribosomal protein S14 OS=Mus musculus GN=Rps14 PE=2 SV=3                                               | 9.9E-08 | 40.2  | 18.5 | 5 (5 0 0 0 0)   | ND                                                                               |
| P62843 | RS15_MOUSE 40S ribosomal protein S15 OS=Mus musculus GN=Rps15 PE=2 SV=2                                               | 1.9E-13 | 40.2  | 31.0 | 8 (8 0 0 0 0)   | ND                                                                               |
| P62245 | RS15A_MOUSE 40S ribosomal protein S15a OS=Mus musculus GN=Rps15a PE=2 SV=2                                            | 2.5E-05 | 30.2  | 25.4 | 5 (5 0 0 0 0)   | ND                                                                               |
| P63276 | RS17_MOUSE 40S ribosomal protein S17 OS=Mus musculus GN=Rps17 PE=1 SV=2                                               | 2.7E-14 | 60.2  | 37.8 | 10 (10 0 0 0 0) | ND                                                                               |

|        |                                                                                      |         |       |      |                 |                                                |
|--------|--------------------------------------------------------------------------------------|---------|-------|------|-----------------|------------------------------------------------|
| P62270 | RS18_MOUSE 40S ribosomal protein S18<br>OS=Mus musculus<br>GN=Rps18 PE=2 SV=3        | 1.2E-09 | 140.2 | 56.6 | 39 (39 0 0 0 0) | Cytoplasm.                                     |
| Q9CZX8 | RS19_MOUSE 40S ribosomal protein S19<br>OS=Mus musculus<br>GN=Rps19 PE=1 SV=3        | 5.4E-07 | 80.2  | 44.1 | 10 (10 0 0 0 0) | ND                                             |
| P25444 | RS2_MOUSE 40S ribosomal protein S2 OS=Mus musculus GN=Rps2 PE=1 SV=3                 | 5.1E-10 | 40.2  | 14.3 | 8 (8 0 0 0 0)   | ND                                             |
| P60867 | RS20_MOUSE 40S ribosomal protein S20<br>OS=Mus musculus<br>GN=Rps20 PE=1 SV=1        | 3.8E-09 | 20.2  | 19.3 | 3 (3 0 0 0 0)   | ND                                             |
| P62267 | RS23_MOUSE 40S ribosomal protein S23<br>OS=Mus musculus<br>GN=Rps23 PE=2 SV=3        | 6.4E-09 | 40.2  | 30.1 | 6 (6 0 0 0 0)   | ND                                             |
| P62849 | RS24_MOUSE 40S ribosomal protein S24<br>OS=Mus musculus<br>GN=Rps24 PE=1 SV=1        | 2.2E-09 | 40.2  | 20.3 | 5 (5 0 0 0 0)   | ND                                             |
| P62852 | RS25_MOUSE 40S ribosomal protein S25<br>OS=Mus musculus<br>GN=Rps25 PE=2 SV=1        | 2.7E-10 | 40.2  | 28.8 | 5 (5 0 0 0 0)   | ND                                             |
| P62908 | RS3_MOUSE 40S ribosomal protein S3 OS=Mus musculus GN=Rps3 PE=1 SV=1                 | 1.2E-14 | 90.2  | 47.3 | 13 (13 0 0 0 0) | Cytoplasm.                                     |
| P62862 | RS30_MOUSE 40S ribosomal protein S30<br>OS=Mus musculus GN=Fau<br>PE=3 SV=1          | 2.8E-06 | 20.2  | 20.3 | 2 (2 0 0 0 0)   | ND                                             |
| P97351 | RS3A_MOUSE 40S ribosomal protein S3a<br>OS=Mus musculus<br>GN=Rps3a PE=1 SV=3        | 6.2E-09 | 110.2 | 39.4 | 16 (16 0 0 0 0) | Cytoplasm.<br>Nucleus.                         |
| P62702 | RS4X_MOUSE 40S ribosomal protein S4, X isoform OS=Mus musculus<br>GN=Rps4x PE=2 SV=2 | 7.1E-11 | 110.2 | 40.7 | 19 (19 0 0 0 0) | Cytoplasm.                                     |
| P62754 | RS6_MOUSE 40S ribosomal protein S6 OS=Mus musculus GN=Rps6 PE=1 SV=1                 | 4.3E-13 | 110.3 | 32.1 | 14 (14 0 0 0 0) | ND                                             |
| P62082 | RS7_MOUSE 40S ribosomal protein S7 OS=Mus musculus GN=Rps7 PE=2 SV=1                 | 9.5E-09 | 20.2  | 19.1 | 2 (2 0 0 0 0)   | Cytoplasm &°<br>cytoskeleton &°<br>centrosome. |
| P62242 | RS8_MOUSE 40S ribosomal protein S8 OS=Mus musculus GN=Rps8 PE=1                      | 3.6E-11 | 80.2  | 38.5 | 15 (15 0 0 0 0) | Cytoplasm.                                     |

|        |                                                                                       |         |       |      |                 |                                                                                                                     |
|--------|---------------------------------------------------------------------------------------|---------|-------|------|-----------------|---------------------------------------------------------------------------------------------------------------------|
|        | SV=2                                                                                  |         |       |      |                 |                                                                                                                     |
| Q6ZWN5 | RS9_MOUSE 40S ribosomal protein S9 OS=Mus musculus GN=Rps9 PE=2 SV=3                  | 1.7E-07 | 70.2  | 27.8 | 10 (10 0 0 0 0) | Cytoplasm.                                                                                                          |
| P14206 | RSSA_MOUSE 40S ribosomal protein SA OS=Mus musculus GN=Rpsa PE=1 SV=4                 | 5.8E-14 | 30.2  | 15.3 | 3 (3 0 0 0 0)   | Cell membrane. Cytoplasm. Nucleus.                                                                                  |
| Q80X85 | RT07_MOUSE 28S ribosomal protein S7, mitochondrial OS=Mus musculus GN=Mrps7 PE=2 SV=1 | 7.4E-08 | 30.2  | 17.4 | 3 (3 0 0 0 0)   | Mitochondrion.                                                                                                      |
| O70622 | RTN2_MOUSE Reticulon-2 OS=Mus musculus GN=Rtn2 PE=1 SV=1                              | 1.1E-15 | 60.3  | 17.8 | 8 (8 0 0 0 0)   | Endoplasmic reticulum membrane; Single-pass membrane protein.                                                       |
| Q9ES97 | RTN3_MOUSE Reticulon-3 OS=Mus musculus GN=Rtn3 PE=1 SV=2                              | 2.0E-10 | 20.2  | 1.3  | 7 (7 0 0 0 0)   | Endoplasmic reticulum membrane; Multi-pass membrane protein. Golgi apparatus membrane; Multi-pass membrane protein. |
| Q99P72 | RTN4_MOUSE Reticulon-4 OS=Mus musculus GN=Rtn4 PE=1 SV=2                              | 1.0E-30 | 170.3 | 23.8 | 52 (52 0 0 0 0) | Endoplasmic reticulum membrane; Multi-pass membrane protein.                                                        |
| P60122 | RUVB1_MOUSE RuvB-like 1 OS=Mus musculus GN=Ruvbl1 PE=1 SV=1                           | 3.6E-10 | 30.2  | 9.0  | 3 (3 0 0 0 0)   | Nucleus.                                                                                                            |
| P08207 | S10AA_MOUSE Protein S100-A10 OS=Mus musculus GN=S100a10 PE=2 SV=2                     | 4.2E-09 | 20.2  | 14.4 | 2 (2 0 0 0 0)   | ND                                                                                                                  |
| P55012 | S12A2_MOUSE Solute carrier family 12 member 2 OS=Mus musculus GN=Slc12a2 PE=1 SV=1    | 1.8E-09 | 90.2  | 10.5 | 15 (15 0 0 0 0) | Membrane; Multi-pass membrane protein.                                                                              |
| Q9JIS8 | S12A4_MOUSE Solute carrier family 12 member 4 OS=Mus musculus GN=Slc12a4 PE=1 SV=2    | 1.5E-07 | 40.2  | 4.6  | 6 (6 0 0 0 0)   | Membrane; Multi-pass membrane protein.                                                                              |
| Q9WVL3 | S12A7_MOUSE Solute carrier family 12 member 7 OS=Mus musculus GN=Slc12a7 PE=1 SV=1    | 2.3E-13 | 180.3 | 19.1 | 40 (40 0 0 0 0) | Membrane; Multi-pass membrane protein.                                                                              |



|        |                                                                                                          |         |       |      |                 |                                                                                                                                            |
|--------|----------------------------------------------------------------------------------------------------------|---------|-------|------|-----------------|--------------------------------------------------------------------------------------------------------------------------------------------|
| Q9JIM1 | S29A1_MOUSE Equilibrative nucleoside transporter 1 OS=Mus musculus GN=Slc29a1 PE=1 SV=3                  | 1.9E-14 | 60.3  | 12.0 | 26 (26 0 0 0 0) | Basolateral cell membrane; Multi-pass membrane protein. Apical cell membrane; Multi-pass membrane protein.                                 |
| Q91ZN5 | S35B2_MOUSE Adenosine 3'-phospho 5'-phosphosulfate transporter 1 OS=Mus musculus GN=Slc35b2 PE=2 SV=1    | 3.6E-06 | 20.2  | 4.9  | 2 (2 0 0 0 0)   | Golgi apparatus membrane; Multi-pass membrane protein.                                                                                     |
| Q8BTY2 | S4A7_MOUSE Sodium bicarbonate cotransporter 3 OS=Mus musculus GN=Slc4a7 PE=1 SV=2                        | 4.6E-13 | 90.2  | 10.7 | 17 (17 0 0 0 0) | Basolateral cell membrane; Multi-pass membrane protein. Apical cell membrane; Multi-pass membrane protein. Cell projection "stereocilium". |
| P61620 | S61A1_MOUSE Protein transport protein Sec61 subunit alpha isoform 1 OS=Mus musculus GN=Sec61a1 PE=2 SV=2 | 3.3E-07 | 20.1  | 2.3  | 2 (2 0 0 0 0)   | Endoplasmic reticulum membrane; Multi-pass membrane protein.                                                                               |
| Q9EP69 | SAC1_MOUSE Phosphatidylinositolide phosphatase SAC1 OS=Mus musculus GN=Sacm11 PE=2 SV=1                  | 1.8E-11 | 60.2  | 8.7  | 6 (6 0 0 0 0)   | Endoplasmic reticulum membrane; Multi-pass membrane protein.                                                                               |
| Q8BGH2 | SAM50_MOUSE Sorting and assembly machinery component 50 homolog OS=Mus musculus GN=Samm50 PE=1 SV=1      | 5.3E-08 | 30.2  | 7.0  | 3 (3 0 0 0 0)   | Mitochondrion outer membrane; Multi-pass membrane protein. Cytoplasm.                                                                      |
| O35874 | SATT_MOUSE Neutral amino acid transporter A OS=Mus musculus GN=Slc1a4 PE=1 SV=1                          | 1.1E-16 | 40.3  | 10.9 | 7 (7 0 0 0 0)   | Membrane; Multi-pass membrane protein. Melanosome.                                                                                         |
| Q9R0P6 | SC11A_MOUSE Signal peptidase complex catalytic subunit SEC11A OS=Mus musculus GN=Sec11a PE=2 SV=1        | 2.0E-07 | 30.2  | 18.4 | 3 (3 0 0 0 0)   | Microsome membrane; Single-pass type II membrane protein. Endoplasmic reticulum membrane; Single-pass type II membrane protein.            |
| O08547 | SC22B_MOUSE Vesicle-trafficking protein SEC22b OS=Mus musculus GN=Sec22b PE=1 SV=3                       | 1.1E-16 | 120.2 | 39.5 | 17 (17 0 0 0 0) | Endoplasmic reticulum-Golgi intermediate compartment membrane; Single-pass type IV                                                         |

|        |                                                                                                         |         |      |      |                 |                                                                                                                                                                     |
|--------|---------------------------------------------------------------------------------------------------------|---------|------|------|-----------------|---------------------------------------------------------------------------------------------------------------------------------------------------------------------|
|        |                                                                                                         |         |      |      |                 | membrane protein. Golgi apparatus membrane; Single-pass type IV membrane protein. Endoplasmic reticulum membrane; Single-pass type IV membrane protein. Melanosome. |
| Q01405 | SC23A_MOUSE Protein transport protein Sec23A OS=Mus musculus GN=Sec23a PE=1 SV=2                        | 3.2E-12 | 20.2 | 4.1  | 2 (2 0 0 0 0)   | Smooth endoplasmic reticulum membrane; Peripheral membrane protein. Golgi apparatus membrane; Peripheral membrane protein.                                          |
| Q9D662 | SC23B_MOUSE Protein transport protein Sec23B OS=Mus musculus GN=Sec23b PE=2 SV=1                        | 7.1E-09 | 20.2 | 3.3  | 2 (2 0 0 0 0)   | Golgi apparatus membrane. Endoplasmic reticulum membrane. Endoplasmic reticulum-Golgi intermediate compartment membrane.                                            |
| O35609 | SCAM3_MOUSE Secretory carrier-associated membrane protein 3 OS=Mus musculus GN=Scamp3 PE=1 SV=2         | 6.3E-11 | 30.2 | 12.9 | 11 (11 0 0 0 0) | Membrane; Multi-pass membrane protein.                                                                                                                              |
| Q8BRF7 | SCFD1_MOUSE Sec1 family domain-containing protein 1 OS=Mus musculus GN=Scfd1 PE=2 SV=1                  | 6.0E-05 | 20.1 | 3.6  | 2 (2 0 0 0 0)   | Cytoplasm. Endoplasmic reticulum membrane; Peripheral membrane protein. Golgi apparatus ° Golgi stack membrane; Peripheral membrane protein.                        |
| Q8BMD8 | SCMC1_MOUSE Calcium-binding mitochondrial carrier protein SCaMC-1 OS=Mus musculus GN=Slc25a24 PE=2 SV=1 | 2.6E-11 | 40.2 | 12.6 | 5 (5 0 0 0 0)   | Mitochondrion inner membrane; Multi-pass membrane protein.                                                                                                          |
| Q80U72 | SCRIB_MOUSE Protein scribble homolog OS=Mus musculus GN=Scrib PE=1 SV=2                                 | 5.4E-14 | 40.3 | 2.8  | 5 (5 0 0 0 0)   | Cell membrane; Peripheral membrane protein. Cell junction °                                                                                                         |

*A novel role of mitochondria in muscle injury*

|        |                                                                                    |         |       |      |                 |                                                                                                                                                   |
|--------|------------------------------------------------------------------------------------|---------|-------|------|-----------------|---------------------------------------------------------------------------------------------------------------------------------------------------|
|        |                                                                                    |         |       |      |                 | adherens junction.<br>Cytoplasm.                                                                                                                  |
| Q8CFE4 | SCYL2_MOUSE SCY1-like protein 2 OS=Mus musculus GN=Scyl2 PE=1 SV=1                 | 2.5E-05 | 30.2  | 4.8  | 3 (3 0 0 0 0)   | Cytoplasm ° perinuclear region. Cytoplasmic vesicle ° clathrin-coated vesicle. Golgi apparatus ° trans-Golgi network membrane. Endosome membrane. |
| O08992 | SDCB1_MOUSE Syntenin-1 OS=Mus musculus GN=Sdcbp PE=2 SV=1                          | 5.2E-08 | 20.2  | 11.4 | 2 (2 0 0 0 0)   | Membrane; Peripheral membrane protein. Melanosome.                                                                                                |
| Q9Z2G6 | SE1L1_MOUSE Protein sel-1 homolog 1 OS=Mus musculus GN=Sel11 PE=2 SV=2             | 1.4E-08 | 20.3  | 3.7  | 2 (2 0 0 0 0)   | Endoplasmic reticulum membrane; Single-pass type I membrane protein.                                                                              |
| Q6QD59 | SEC20_MOUSE Vesicle transport protein SEC20 OS=Mus musculus GN=Bnip1 PE=2 SV=1     | 1.2E-06 | 40.1  | 17.5 | 4 (4 0 0 0 0)   | Endoplasmic reticulum membrane; Single-pass type IV membrane protein. Golgi apparatus membrane; Single-pass type IV membrane protein.             |
| Q8VHE0 | SEC63_MOUSE Translocation protein SEC63 homolog OS=Mus musculus GN=Sec63 PE=1 SV=3 | 1.4E-09 | 190.2 | 22.9 | 23 (23 0 0 0 0) | Endoplasmic reticulum membrane; Multi-pass membrane protein.                                                                                      |
| Q9QUR8 | SEM7A_MOUSE Semaphorin-7A OS=Mus musculus GN=Sema7a PE=2 SV=1                      | 2.1E-09 | 20.2  | 5.1  | 2 (2 0 0 0 0)   | Cell membrane; Lipid-anchor ° GPI-anchor; Extracellular side.                                                                                     |
| Q8C1B7 | SEP11_MOUSE Septin-11 OS=Mus musculus GN=Sept11 PE=1 SV=4                          | 2.3E-11 | 30.2  | 9.3  | 3 (3 0 0 0 0)   | Cytoplasm. Cytoplasm ° cytoskeleton. Cell junction ° synapse. Cell projection ° dendritic spine. Cell projection ° axon.                          |
| P42208 | SEPT2_MOUSE Septin-2 OS=Mus musculus GN=Sept2 PE=1 SV=2                            | 4.2E-08 | 20.3  | 7.5  | 2 (2 0 0 0 0)   | Cytoplasm. Cytoplasm ° cytoskeleton. Cytoplasm ° cytoskeleton °                                                                                   |

*A novel role of mitochondria in muscle injury*

|        |                                                                                      |         |       |      |                 |                                                                                                                                                         |
|--------|--------------------------------------------------------------------------------------|---------|-------|------|-----------------|---------------------------------------------------------------------------------------------------------------------------------------------------------|
|        |                                                                                      |         |       |      |                 | spindle.<br>Chromosome centromere kinetochore.<br>Cleavage furrow.<br>Midbody.<br>Cytoplasm cell cortex.                                                |
| O55131 | SEPT7_MOUSE Septin-7<br>OS=Mus musculus<br>GN=Sept7 PE=1 SV=1                        | 4.0E-06 | 20.1  | 4.4  | 2 (2 0 0 0 0)   | Cytoplasm.<br>Chromosome centromere kinetochore.<br>Cytoplasm cytoskeleton spindle. Cleavage furrow. Midbody.<br>Cytoplasm cytoskeleton cilium axoneme. |
| Q61753 | SERA_MOUSE D-3-phosphoglycerate dehydrogenase<br>OS=Mus musculus GN=Phgdh PE=1 SV=3  | 2.3E-09 | 70.2  | 15.2 | 13 (13 0 0 0 0) | ND                                                                                                                                                      |
| P19324 | SERPH_MOUSE Serpin H1<br>OS=Mus musculus<br>GN=Serpinh1 PE=1 SV=2                    | 4.0E-12 | 158.3 | 39.3 | 24 (23 1 0 0 0) | Endoplasmic reticulum lumen.                                                                                                                            |
| Q64213 | SF01_MOUSE Splicing factor 1<br>OS=Mus musculus<br>GN=Sf1 PE=1 SV=5                  | 1.3E-07 | 30.2  | 8.1  | 3 (3 0 0 0 0)   | Nucleus.                                                                                                                                                |
| Q99JR1 | SFXN1_MOUSE Sideroflexin-1<br>OS=Mus musculus GN=Sfxn1 PE=1 SV=3                     | 7.2E-13 | 58.3  | 22.7 | 6 (5 1 0 0 0)   | Mitochondrion membrane; Multi-pass membrane protein.                                                                                                    |
| Q91V61 | SFXN3_MOUSE Sideroflexin-3<br>OS=Mus musculus GN=Sfxn3 PE=1 SV=1                     | 6.7E-10 | 20.2  | 8.1  | 2 (2 0 0 0 0)   | Mitochondrion membrane; Multi-pass membrane protein.                                                                                                    |
| Q8R0X7 | SGPL1_MOUSE Sphingosine-1-phosphate lyase 1<br>OS=Mus musculus<br>GN=Sgpl1 PE=2 SV=1 | 1.4E-11 | 80.2  | 14.3 | 10 (10 0 0 0 0) | Endoplasmic reticulum membrane; Single-pass type III membrane protein.                                                                                  |
| Q9JK48 | SHLB1_MOUSE Endophilin-B1<br>OS=Mus musculus GN=Sh3glb1 PE=1 SV=1                    | 1.2E-05 | 30.1  | 9.6  | 3 (3 0 0 0 0)   | Cytoplasm. Golgi apparatus membrane; Peripheral membrane protein.<br>Mitochondrion outer membrane; Peripheral membrane protein.                         |
| Q9CU62 | SMC1A_MOUSE Structural maintenance of chromosomes protein 1A                         | 2.9E-08 | 60.2  | 6.0  | 7 (7 0 0 0 0)   | Nucleus.<br>Chromosome.<br>Chromosome                                                                                                                   |

|        |                                                                                                        |         |       |      |                 |                                                                                                                                                   |
|--------|--------------------------------------------------------------------------------------------------------|---------|-------|------|-----------------|---------------------------------------------------------------------------------------------------------------------------------------------------|
|        | OS=Mus musculus<br>GN=Smc1a PE=1 SV=3                                                                  |         |       |      |                 | centromere.                                                                                                                                       |
| Q9CW03 | SMC3_MOUSE Structural maintenance of chromosomes protein 3<br>OS=Mus musculus<br>GN=Smc3 PE=1 SV=2     | 2.7E-09 | 70.2  | 7.4  | 7 (7 0 0 0 0)   | Nucleus.<br>Chromosome.<br>Chromosome â€° centromere.                                                                                             |
| Q78PY7 | SND1_MOUSE Staphylococcal nuclease domain-containing protein 1<br>OS=Mus musculus<br>GN=Snd1 PE=1 SV=1 | 2.3E-06 | 40.2  | 7.5  | 4 (4 0 0 0 0)   | Cytoplasm.<br>Nucleus.<br>Melanosome.                                                                                                             |
| O09044 | SNP23_MOUSE Synaptosomal-associated protein 23<br>OS=Mus musculus<br>GN=Snap23 PE=1 SV=1               | 3.1E-14 | 100.3 | 48.6 | 23 (23 0 0 0 0) | Cell membrane;<br>Peripheral membrane protein.<br>Cell membrane;<br>Lipid-anchor. Cell junction â€° synapse â€° synaptosome.                      |
| Q61235 | SNTB2_MOUSE Beta-2-syntrophin<br>OS=Mus musculus<br>GN=Sntb2 PE=1 SV=2                                 | 7.7E-08 | 30.2  | 6.9  | 3 (3 0 0 0 0)   | Membrane.<br>Cytoplasmic vesicle â€° secretory vesicle membrane;<br>Peripheral membrane protein.<br>Cell junction.<br>Cytoplasm â€° cytoskeleton. |
| Q61263 | SOAT1_MOUSE Sterol O-acyltransferase 1<br>OS=Mus musculus<br>GN=Soat1 PE=2 SV=1                        | 8.9E-11 | 20.2  | 5.0  | 2 (2 0 0 0 0)   | Endoplasmic reticulum membrane;<br>Multi-pass membrane protein.                                                                                   |
| Q3UPH7 | SOLO_MOUSE Protein SOLO<br>OS=Mus musculus<br>GN=Solo PE=2 SV=1                                        | 1.1E-08 | 20.1  | 1.6  | 2 (2 0 0 0 0)   | Cytoplasm.                                                                                                                                        |
| Q9EPR5 | SORC2_MOUSE VPS10 domain-containing receptor SorCS2<br>OS=Mus musculus<br>GN=Sorcs2 PE=1 SV=1          | 5.9E-11 | 110.2 | 10.6 | 15 (15 0 0 0 0) | Membrane; Single-pass type I membrane protein.                                                                                                    |
| Q9CYN2 | SPCS2_MOUSE Signal peptidase complex subunit 2<br>OS=Mus musculus<br>GN=Spcs2 PE=2 SV=1                | 9.4E-12 | 70.3  | 28.8 | 8 (8 0 0 0 0)   | Microsome membrane; Multi-pass membrane protein.<br>Endoplasmic reticulum membrane; Multi-pass membrane protein.                                  |
| P16546 | SPTA2_MOUSE Spectrin alpha chain, brain<br>OS=Mus musculus<br>GN=Sptan1 PE=1                           | 1.5E-12 | 360.3 | 21.2 | 46 (46 0 0 0 0) | Cytoplasm â€° cytoskeleton.<br>Cytoplasm â€° cell                                                                                                 |

|        |                                                                                                  |         |       |      |                 |                                                                                                                                                                                                                                 |
|--------|--------------------------------------------------------------------------------------------------|---------|-------|------|-----------------|---------------------------------------------------------------------------------------------------------------------------------------------------------------------------------------------------------------------------------|
|        | SV=4                                                                                             |         |       |      |                 | cortex.                                                                                                                                                                                                                         |
| P15508 | SPTB1_MOUSE Spectrin beta chain, erythrocyte OS=Mus musculus GN=Sptb PE=1 SV=4                   | 8.0E-05 | 20.2  | 0.8  | 2 (2 0 0 0 0)   | Cytoplasm $\hat{\epsilon}^{\circ}$ cytoskeleton. Cytoplasm $\hat{\epsilon}^{\circ}$ cell cortex.                                                                                                                                |
| Q62261 | SPTB2_MOUSE Spectrin beta chain, brain 1 OS=Mus musculus GN=Sptbn1 PE=1 SV=2                     | 4.4E-15 | 350.4 | 20.9 | 45 (45 0 0 0 0) | Cytoplasm $\hat{\epsilon}^{\circ}$ cytoskeleton. Cytoplasm $\hat{\epsilon}^{\circ}$ myofibril $\hat{\epsilon}^{\circ}$ sarcomere $\hat{\epsilon}^{\circ}$ M line. Cell membrane; Peripheral membrane protein; Cytoplasmic side. |
| O35704 | SPTC1_MOUSE Serine palmitoyltransferase 1 OS=Mus musculus GN=Sptlc1 PE=2 SV=1                    | 6.3E-06 | 20.2  | 4.9  | 3 (3 0 0 0 0)   | Endoplasmic reticulum membrane; Single-pass membrane protein.                                                                                                                                                                   |
| P97363 | SPTC2_MOUSE Serine palmitoyltransferase 2 OS=Mus musculus GN=Sptlc2 PE=2 SV=2                    | 3.3E-16 | 20.2  | 6.6  | 3 (3 0 0 0 0)   | Endoplasmic reticulum membrane; Single-pass membrane protein.                                                                                                                                                                   |
| Q64337 | SQSTM_MOUSE Sequestosome-1 OS=Mus musculus GN=Sqstm1 PE=1 SV=1                                   | 2.0E-07 | 20.2  | 7.5  | 2 (2 0 0 0 0)   | Cytoplasm. Late endosome. Nucleus.                                                                                                                                                                                              |
| Q9DBG7 | SRPR_MOUSE Signal recognition particle receptor subunit alpha OS=Mus musculus GN=Srpr PE=1 SV=1  | 4.3E-11 | 110.2 | 11.6 | 12 (12 0 0 0 0) | Endoplasmic reticulum membrane; Peripheral membrane protein.                                                                                                                                                                    |
| P47758 | SRPRB_MOUSE Signal recognition particle receptor subunit beta OS=Mus musculus GN=Srprb PE=1 SV=1 | 3.2E-13 | 70.2  | 34.2 | 12 (12 0 0 0 0) | Endoplasmic reticulum membrane; Single-pass membrane protein.                                                                                                                                                                   |
| Q9CY50 | SSRA_MOUSE Translocon-associated protein subunit alpha OS=Mus musculus GN=Ssr1 PE=1 SV=1         | 2.1E-10 | 40.2  | 21.0 | 10 (10 0 0 0 0) | Endoplasmic reticulum membrane; Single-pass type I membrane protein.                                                                                                                                                            |
| Q62186 | SSRD_MOUSE Translocon-associated protein subunit delta OS=Mus musculus GN=Ssr4 PE=2 SV=1         | 3.1E-08 | 40.2  | 30.8 | 4 (4 0 0 0 0)   | Endoplasmic reticulum membrane; Single-pass type I membrane protein.                                                                                                                                                            |
| Q9DCF9 | SSRG_MOUSE Translocon-associated protein subunit gamma OS=Mus musculus GN=Ssr3 PE=1 SV=1         | 2.8E-10 | 30.2  | 15.1 | 3 (3 0 0 0 0)   | Endoplasmic reticulum membrane; Multi-pass membrane                                                                                                                                                                             |

|        |                                                                                                                             |         |       |      |                 |                                                                                                                                              |
|--------|-----------------------------------------------------------------------------------------------------------------------------|---------|-------|------|-----------------|----------------------------------------------------------------------------------------------------------------------------------------------|
|        |                                                                                                                             |         |       |      |                 | protein.                                                                                                                                     |
| P42225 | STAT1_MOUSE Signal transducer and activator of transcription 1 OS=Mus musculus GN=Stat1 PE=1 SV=1                           | 9.7E-12 | 100.3 | 17.8 | 13 (13 0 0 0 0) | Cytoplasm. Nucleus.                                                                                                                          |
| Q8BWB6 | STEA2_MOUSE Metalloreductase STEAP2 OS=Mus musculus GN=Steap2 PE=2 SV=1                                                     | 5.2E-10 | 40.2  | 8.8  | 5 (5 0 0 0 0)   | Cell membrane; Multi-pass membrane protein. Endosome membrane; Multi-pass membrane protein.                                                  |
| Q60864 | STIP1_MOUSE Stress-induced-phosphoprotein 1 OS=Mus musculus GN=Stip1 PE=1 SV=1                                              | 1.3E-05 | 40.2  | 7.6  | 4 (4 0 0 0 0)   | Cytoplasm. Nucleus.                                                                                                                          |
| Q99JB2 | STML2_MOUSE Stomatolike protein 2 OS=Mus musculus GN=Stoml2 PE=1 SV=1                                                       | 7.0E-14 | 80.3  | 28.9 | 10 (10 0 0 0 0) | Membrane; Peripheral membrane protein. Cytoplasm. Cytoplasmic cytoskeleton.                                                                  |
| P54116 | STOM_MOUSE Erythrocyte band 7 integral membrane protein OS=Mus musculus GN=Stom PE=1 SV=3                                   | 1.2E-14 | 138.4 | 43.0 | 23 (22 1 0 0 0) | Cell membrane; Peripheral membrane protein; Cytoplasmic side. Cell membrane; Lipid-anchor; Cytoplasmic side. Melanosome.                     |
| P46978 | STT3A_MOUSE Dolichylidiphosphooligosaccharide--protein glycosyltransferase subunit STT3A OS=Mus musculus GN=Stt3a PE=1 SV=1 | 7.0E-08 | 60.2  | 5.7  | 11 (11 0 0 0 0) | Endoplasmic reticulum membrane; Multi-pass membrane protein.                                                                                 |
| Q3TDQ1 | STT3B_MOUSE Dolichylidiphosphooligosaccharide--protein glycosyltransferase subunit STT3B OS=Mus musculus GN=Stt3b PE=1 SV=2 | 3.8E-12 | 50.2  | 6.2  | 6 (6 0 0 0 0)   | Endoplasmic reticulum membrane; Multi-pass membrane protein.                                                                                 |
| Q9ER00 | STX12_MOUSE Syntaxin-12 OS=Mus musculus GN=Stx12 PE=1 SV=1                                                                  | 6.8E-11 | 80.3  | 33.6 | 9 (9 0 0 0 0)   | Endomembrane system; Single-pass type IV membrane protein; Cytoplasmic side. Golgi apparatus membrane; Single-pass type IV membrane protein. |

*A novel role of mitochondria in muscle injury*

|        |                                                                                                               |         |      |      |                 |                                                                                                                                                                      |
|--------|---------------------------------------------------------------------------------------------------------------|---------|------|------|-----------------|----------------------------------------------------------------------------------------------------------------------------------------------------------------------|
| Q8VDS8 | STX18_MOUSE Syntaxin-18 OS=Mus musculus GN=Stx18 PE=2 SV=2                                                    | 7.5E-10 | 40.2 | 17.7 | 5 (5 0 0 0 0)   | Endoplasmic reticulum membrane; Single-pass type IV membrane protein. Golgi apparatus membrane; Single-pass type IV membrane protein.                                |
| Q00262 | STX2_MOUSE Syntaxin-2 OS=Mus musculus GN=Stx2 PE=2 SV=1                                                       | 1.1E-06 | 30.2 | 11.4 | 4 (4 0 0 0 0)   | Membrane; Single-pass type IV membrane protein.                                                                                                                      |
| P70452 | STX4_MOUSE Syntaxin-4 OS=Mus musculus GN=Stx4 PE=1 SV=1                                                       | 2.8E-09 | 80.2 | 31.2 | 15 (15 0 0 0 0) | Cell membrane; Single-pass type IV membrane protein.                                                                                                                 |
| Q8K1E0 | STX5_MOUSE Syntaxin-5 OS=Mus musculus GN=Stx5 PE=2 SV=3                                                       | 7.2E-09 | 20.2 | 9.9  | 4 (4 0 0 0 0)   | Endoplasmic reticulum-Golgi intermediate compartment membrane; Single-pass type IV membrane protein. Golgi apparatus membrane; Single-pass type IV membrane protein. |
| O70439 | STX7_MOUSE Syntaxin-7 OS=Mus musculus GN=Stx7 PE=1 SV=3                                                       | 2.6E-11 | 20.2 | 11.1 | 3 (3 0 0 0 0)   | Early endosome membrane; Single-pass type IV membrane protein.                                                                                                       |
| O88983 | STX8_MOUSE Syntaxin-8 OS=Mus musculus GN=Stx8 PE=2 SV=1                                                       | 1.9E-11 | 20.3 | 11.9 | 2 (2 0 0 0 0)   | Membrane; Single-pass type IV membrane protein.                                                                                                                      |
| O08599 | STXB1_MOUSE Syntaxin-binding protein 1 OS=Mus musculus GN=Stxbp1 PE=1 SV=2                                    | 6.8E-08 | 50.2 | 9.9  | 5 (5 0 0 0 0)   | ND                                                                                                                                                                   |
| Q60770 | STXB3_MOUSE Syntaxin-binding protein 3 OS=Mus musculus GN=Stxbp3 PE=1 SV=1                                    | 1.9E-05 | 20.1 | 3.4  | 2 (2 0 0 0 0)   | Cytoplasm &sup3; cytosol. Cell membrane.                                                                                                                             |
| Q9WUM5 | SUCA_MOUSE Succinyl-CoA ligase [GDP-forming] subunit alpha, mitochondrial OS=Mus musculus GN=Suclg1 PE=1 SV=4 | 3.6E-08 | 40.2 | 11.6 | 4 (4 0 0 0 0)   | Mitochondrion.                                                                                                                                                       |
| Q64310 | SURF4_MOUSE Surfeit locus protein 4 OS=Mus musculus GN=Surf4 PE=2 SV=1                                        | 2.4E-08 | 40.2 | 9.7  | 9 (9 0 0 0 0)   | Endoplasmic reticulum membrane; Multi-pass membrane protein. Endoplasmic reticulum-Golgi intermediate compartment                                                    |



|        |                                                                                     |         |      |      |                 |                                                                                                                       |
|--------|-------------------------------------------------------------------------------------|---------|------|------|-----------------|-----------------------------------------------------------------------------------------------------------------------|
|        |                                                                                     |         |      |      |                 | membrane; Multi-pass membrane protein. Golgi apparatus membrane; Multi-pass membrane protein.                         |
| Q8BGQ7 | SYAC_MOUSE Alanyl-tRNA synthetase, cytoplasmic OS=Mus musculus GN=Aars PE=2 SV=1    | 1.1E-06 | 30.2 | 4.8  | 3 (3 0 0 0 0)   | Cytoplasm.                                                                                                            |
| Q922B2 | SYDC_MOUSE Aspartyl-tRNA synthetase, cytoplasmic OS=Mus musculus GN=Dars PE=2 SV=1  | 4.1E-12 | 60.2 | 14.2 | 7 (7 0 0 0 0)   | Cytoplasm.                                                                                                            |
| Q8CGC7 | SYEP_MOUSE Bifunctional aminoacyl-tRNA synthetase OS=Mus musculus GN=Eprs PE=2 SV=3 | 3.2E-12 | 90.3 | 7.9  | 10 (10 0 0 0 0) | ND                                                                                                                    |
| Q9CZD3 | SYG_MOUSE Glycyl-tRNA synthetase OS=Mus musculus GN=Gars PE=1 SV=1                  | 5.9E-07 | 30.2 | 4.9  | 4 (4 0 0 0 0)   | Cytoplasm. Mitochondrion.                                                                                             |
| Q9D6K5 | SYJ2B_MOUSE Synaptojanin-2-binding protein OS=Mus musculus GN=Synj2bp PE=1 SV=1     | 1.0E-05 | 20.2 | 15.9 | 2 (2 0 0 0 0)   | Mitochondrion outer membrane; Single-pass type IV membrane protein; Cytoplasmic side. Cytoplasmic perinuclear region. |
| Q8BMJ2 | SYLC_MOUSE Leucyl-tRNA synthetase, cytoplasmic OS=Mus musculus GN=Lars PE=2 SV=2    | 8.3E-12 | 30.2 | 3.6  | 3 (3 0 0 0 0)   | Cytoplasm.                                                                                                            |
| Q68FL6 | SYMC_MOUSE Methionyl-tRNA synthetase, cytoplasmic OS=Mus musculus GN=Mars PE=2 SV=1 | 3.9E-10 | 30.3 | 4.9  | 3 (3 0 0 0 0)   | Cytoplasm.                                                                                                            |
| Q9D0R2 | SYTC_MOUSE Threonyl-tRNA synthetase, cytoplasmic OS=Mus musculus GN=Tars PE=1 SV=2  | 1.8E-07 | 20.1 | 3.3  | 2 (2 0 0 0 0)   | Cytoplasm.                                                                                                            |
| Q9Z1Q9 | SYVC_MOUSE Valyl-tRNA synthetase OS=Mus musculus GN=Vars PE=2 SV=1                  | 1.7E-12 | 50.2 | 5.0  | 5 (5 0 0 0 0)   | ND                                                                                                                    |
| Q921F2 | TADBP_MOUSE TAR DNA-binding protein 43 OS=Mus musculus GN=Tardbp PE=1 SV=1          | 4.7E-14 | 60.2 | 17.9 | 8 (8 0 0 0 0)   | Nucleus.                                                                                                              |

|            |                                                                                            |         |       |      |                      |                                                                               |
|------------|--------------------------------------------------------------------------------------------|---------|-------|------|----------------------|-------------------------------------------------------------------------------|
| Q9WVA<br>4 | TAGL2_MOUSE<br>Transgelin-2 OS=Mus<br>musculus GN=Tagln2 PE=1<br>SV=4                      | 9.7E-07 | 50.2  | 24.1 | 5 (5 0 0 0 0)        | ND                                                                            |
| P21958     | TAP1_MOUSE Antigen<br>peptide transporter 1<br>OS=Mus musculus<br>GN=Tap1 PE=2 SV=2        | 3.4E-14 | 150.4 | 27.8 | 23 (23 0 0 0<br>0)   | Endoplasmic<br>reticulum<br>membrane; Multi-<br>pass membrane<br>protein.     |
| P36371     | TAP2_MOUSE Antigen<br>peptide transporter 2<br>OS=Mus musculus<br>GN=Tap2 PE=2 SV=1        | 7.8E-15 | 160.3 | 23.4 | 33 (33 0 0 0<br>0)   | Endoplasmic<br>reticulum<br>membrane; Multi-<br>pass membrane<br>protein.     |
| P68369     | TBA1A_MOUSE Tubulin<br>alpha-1A chain OS=Mus<br>musculus GN=Tuba1a PE=1<br>SV=1            | 3.0E-14 | 160.3 | 43.7 | 100 (100 0 0<br>0 0) | Cytoplasm â€°<br>cytoskeleton.                                                |
| Q7TMM<br>9 | TBB2A_MOUSE Tubulin<br>beta-2A chain OS=Mus<br>musculus GN=Tubb2a PE=1<br>SV=1             | 1.0E-30 | 312.4 | 48.3 | 105 (99 3 3 0<br>0)  | Cytoplasm â€°<br>cytoskeleton.                                                |
| P68372     | TBB2C_MOUSE Tubulin<br>beta-2C chain OS=Mus<br>musculus GN=Tubb2c PE=1<br>SV=1             | 1.0E-30 | 90.3  | 20.2 | 19 (19 0 0 0<br>0)   | Cytoplasm â€°<br>cytoskeleton.                                                |
| Q9ERD7     | TBB3_MOUSE Tubulin<br>beta-3 chain OS=Mus<br>musculus GN=Tubb3 PE=1<br>SV=1                | 3.5E-07 | 36.3  | 9.1  | 4 (3 0 1 0 0)        | Cytoplasm â€°<br>cytoskeleton.                                                |
| P99024     | TBB5_MOUSE Tubulin<br>beta-5 chain OS=Mus<br>musculus GN=Tubb5 PE=1<br>SV=1                | 1.8E-13 | 60.3  | 10.1 | 22 (22 0 0 0<br>0)   | Cytoplasm â€°<br>cytoskeleton.                                                |
| Q922F4     | TBB6_MOUSE Tubulin<br>beta-6 chain OS=Mus<br>musculus GN=Tubb6 PE=1<br>SV=1                | 1.0E-30 | 70.3  | 19.7 | 7 (7 0 0 0 0)        | Cytoplasm â€°<br>cytoskeleton.                                                |
| P11984     | TCPA1_MOUSE T-complex<br>protein 1 subunit alpha A<br>OS=Mus musculus<br>GN=Tcp1 PE=1 SV=2 | 1.0E-30 | 160.3 | 34.9 | 28 (28 0 0 0<br>0)   | #N/A                                                                          |
| P11983     | TCPA2_MOUSE T-complex<br>protein 1 subunit alpha B<br>OS=Mus musculus<br>GN=Tcp1 PE=1 SV=3 | 6.7E-15 | 40.3  | 10.1 | 6 (6 0 0 0 0)        | Cytoplasm.<br>Cytoplasm â€°<br>cytoskeleton â€°<br>centrosome.                |
| P80314     | TCPB_MOUSE T-complex<br>protein 1 subunit beta<br>OS=Mus musculus GN=Cct2<br>PE=1 SV=4     | 6.2E-14 | 180.3 | 42.2 | 25 (25 0 0 0<br>0)   | Cytoplasm.                                                                    |
| P80315     | TCPD_MOUSE T-complex<br>protein 1 subunit delta<br>OS=Mus musculus GN=Cct4<br>PE=1 SV=3    | 3.9E-12 | 110.3 | 30.2 | 13 (13 0 0 0<br>0)   | Cytoplasm.<br>Melanosome.<br>Cytoplasm â€°<br>cytoskeleton â€°<br>centrosome. |

|        |                                                                                           |         |       |      |                 |                                                                        |
|--------|-------------------------------------------------------------------------------------------|---------|-------|------|-----------------|------------------------------------------------------------------------|
| P80316 | TCPE_MOUSE T-complex protein 1 subunit epsilon<br>OS=Mus musculus GN=Cct5<br>PE=1 SV=1    | 1.7E-10 | 70.3  | 16.6 | 9 (9 0 0 0 0)   | Cytoplasm.<br>Cytoplasm &#x2296<br>cytoskeleton &#x2296<br>centrosome. |
| P80318 | TCPG_MOUSE T-complex protein 1 subunit gamma<br>OS=Mus musculus GN=Cct3<br>PE=1 SV=1      | 1.1E-12 | 224.3 | 34.7 | 34 (32 1 1 0 0) | Cytoplasm.                                                             |
| P80313 | TCPH_MOUSE T-complex protein 1 subunit eta<br>OS=Mus musculus GN=Cct7<br>PE=1 SV=1        | 5.0E-14 | 120.3 | 28.9 | 16 (16 0 0 0 0) | Cytoplasm.                                                             |
| P42932 | TCPQ_MOUSE T-complex protein 1 subunit theta<br>OS=Mus musculus GN=Cct8<br>PE=1 SV=3      | 3.2E-12 | 110.2 | 22.8 | 15 (15 0 0 0 0) | Cytoplasm.<br>Cytoplasm &#x2296<br>cytoskeleton &#x2296<br>centrosome. |
| Q61390 | TCPW_MOUSE T-complex protein 1 subunit zeta-2<br>OS=Mus musculus<br>GN=Cct6b PE=2 SV=4    | 3.1E-09 | 46.2  | 10.0 | 10 (8 2 0 0 0)  | Cytoplasm.                                                             |
| P80317 | TCPZ_MOUSE T-complex protein 1 subunit zeta<br>OS=Mus musculus<br>GN=Cct6a PE=1 SV=3      | 2.5E-13 | 110.3 | 25.2 | 19 (19 0 0 0 0) | Cytoplasm.                                                             |
| P63028 | TCTP_MOUSE<br>Translationally-controlled tumor protein OS=Mus musculus GN=Tpt1 PE=1 SV=1  | 4.2E-11 | 20.2  | 14.0 | 3 (3 0 0 0 0)   | Cytoplasm.                                                             |
| Q9CY27 | TECR_MOUSE Trans-2,3-enoyl-CoA reductase<br>OS=Mus musculus GN=Tecr<br>PE=1 SV=1          | 7.1E-09 | 30.2  | 10.7 | 7 (7 0 0 0 0)   | Endoplasmic reticulum membrane; Multi-pass membrane protein.           |
| Q01853 | TERA_MOUSE Transitional endoplasmic reticulum ATPase OS=Mus musculus GN=Vcp PE=1 SV=4     | 3.6E-13 | 130.3 | 22.3 | 36 (36 0 0 0 0) | Cytoplasm &#x2296<br>cytosol. Nucleus.                                 |
| Q62351 | TFR1_MOUSE Transferrin receptor protein 1 OS=Mus musculus GN=Tfrc PE=1 SV=1               | 3.3E-13 | 320.2 | 35.4 | 65 (65 0 0 0 0) | Cell membrane; Single-pass type II membrane protein. Melanosome.       |
| Q8QZT1 | THIL_MOUSE Acetyl-CoA acetyltransferase, mitochondrial OS=Mus musculus GN=Acat1 PE=1 SV=1 | 7.6E-11 | 30.3  | 12.5 | 4 (4 0 0 0 0)   | Mitochondrion.                                                         |
| Q8BWT1 | THIM_MOUSE 3-ketoacyl-CoA thiolase, mitochondrial OS=Mus musculus GN=Acaa2 PE=1 SV=2      | 2.3E-11 | 50.2  | 21.2 | 5 (5 0 0 0 0)   | Mitochondrion.                                                         |
| Q62318 | TIF1B_MOUSE<br>Transcription intermediary factor 1-beta OS=Mus musculus GN=Trim28 PE=1    | 2.9E-11 | 30.2  | 5.5  | 3 (3 0 0 0 0)   | Nucleus.                                                               |

|        |                                                                                                                  |         |       |      |                 |                                                                                                                                                                                 |
|--------|------------------------------------------------------------------------------------------------------------------|---------|-------|------|-----------------|---------------------------------------------------------------------------------------------------------------------------------------------------------------------------------|
|        | SV=3                                                                                                             |         |       |      |                 |                                                                                                                                                                                 |
| Q9CQV1 | TIM16_MOUSE<br>Mitochondrial import inner membrane translocase subunit Tim16 OS=Mus musculus GN=Timm16 PE=2 SV=1 | 1.2E-07 | 20.2  | 34.4 | 2 (2 0 0 0 0)   | Mitochondrion inner membrane; Peripheral membrane protein.                                                                                                                      |
| O35857 | TIM44_MOUSE<br>Mitochondrial import inner membrane translocase subunit TIM44 OS=Mus musculus GN=Timm44 PE=2 SV=1 | 4.8E-11 | 30.2  | 8.0  | 3 (3 0 0 0 0)   | Mitochondrion inner membrane.                                                                                                                                                   |
| Q9D880 | TIM50_MOUSE<br>Mitochondrial import inner membrane translocase subunit TIM50 OS=Mus musculus GN=Timm50 PE=1 SV=1 | 2.7E-13 | 60.3  | 23.2 | 8 (8 0 0 0 0)   | Mitochondrion inner membrane; Single-pass membrane protein.                                                                                                                     |
| P26039 | TLN1_MOUSE Talin-1 OS=Mus musculus GN=Tln1 PE=1 SV=1                                                             | 1.6E-14 | 350.3 | 18.7 | 58 (58 0 0 0 0) | Cell projection $\hat{\epsilon}^{\circ}$ ruffle membrane; Peripheral membrane protein; Cytoplasmic side. Cytoplasm $\hat{\epsilon}^{\circ}$ cytoskeleton.                       |
| Q3UBX0 | TM109_MOUSE<br>Transmembrane protein 109 OS=Mus musculus GN=Tmem109 PE=1 SV=2                                    | 1.5E-08 | 20.2  | 5.3  | 3 (3 0 0 0 0)   | Nucleus outer membrane; Multi-pass membrane protein. Endoplasmic reticulum membrane; Multi-pass membrane protein. Sarcoplasmic reticulum membrane; Multi-pass membrane protein. |
| Q99KI3 | TM111_MOUSE<br>Transmembrane protein 111 OS=Mus musculus GN=Tmem111 PE=2 SV=3                                    | 2.6E-10 | 40.3  | 17.2 | 4 (4 0 0 0 0)   | Membrane; Multi-pass membrane protein.                                                                                                                                          |
| Q9WUH1 | TM115_MOUSE<br>Transmembrane protein 115 OS=Mus musculus GN=Tmem115 PE=1 SV=1                                    | 7.3E-08 | 20.1  | 9.4  | 2 (2 0 0 0 0)   | Membrane; Multi-pass membrane protein.                                                                                                                                          |
| Q8R138 | TM119_MOUSE<br>Transmembrane protein 119 OS=Mus musculus GN=Tmem119 PE=2 SV=1                                    | 1.4E-13 | 20.3  | 8.2  | 6 (6 0 0 0 0)   | Membrane; Single-pass type I membrane protein.                                                                                                                                  |

|        |                                                                                                                   |         |      |      |               |                                                                                                                                                                                                        |
|--------|-------------------------------------------------------------------------------------------------------------------|---------|------|------|---------------|--------------------------------------------------------------------------------------------------------------------------------------------------------------------------------------------------------|
| Q3TBT3 | TM173_MOUSE<br>Transmembrane protein 173<br>OS=Mus musculus<br>GN=Tmem173 PE=1 SV=2                               | 9.9E-14 | 30.3 | 12.4 | 3 (3 0 0 0 0) | Endoplasmic reticulum membrane; Multi-pass membrane protein. Mitochondrion outer membrane; Multi-pass membrane protein. Cell membrane; Multi-pass membrane protein. Cytoplasmic perinuclear region.    |
| Q8BM55 | TM214_MOUSE<br>Transmembrane protein 214<br>OS=Mus musculus<br>GN=Tmem214 PE=2 SV=1                               | 1.1E-06 | 30.1 | 4.9  | 3 (3 0 0 0 0) | Membrane; Multi-pass membrane protein.                                                                                                                                                                 |
| P58021 | TM9S2_MOUSE<br>Transmembrane 9 superfamily member 2<br>OS=Mus musculus<br>GN=Tm9sf2 PE=2 SV=1                     | 4.0E-12 | 40.3 | 7.3  | 7 (7 0 0 0 0) | Endosome membrane; Multi-pass membrane protein.                                                                                                                                                        |
| Q8BH24 | TM9S4_MOUSE<br>Transmembrane 9 superfamily member 4<br>OS=Mus musculus<br>GN=Tm9sf4 PE=2 SV=1                     | 4.1E-09 | 40.2 | 6.4  | 4 (4 0 0 0 0) | Membrane; Multi-pass membrane protein.                                                                                                                                                                 |
| Q921L3 | TMCO1_MOUSE<br>Transmembrane and coiled-coil domain-containing protein 1<br>OS=Mus musculus<br>GN=Tmco1 PE=2 SV=1 | 2.9E-11 | 30.2 | 21.3 | 5 (5 0 0 0 0) | Endoplasmic reticulum membrane; Multi-pass membrane protein. Golgi apparatus membrane; Multi-pass membrane protein.                                                                                    |
| Q3V009 | TMED1_MOUSE<br>Transmembrane emp24 domain-containing protein 1<br>OS=Mus musculus<br>GN=Tmed1 PE=2 SV=1           | 5.5E-06 | 50.2 | 14.1 | 7 (7 0 0 0 0) | Cell membrane; Single-pass type I membrane protein.                                                                                                                                                    |
| Q9R0Q3 | TMED2_MOUSE<br>Transmembrane emp24 domain-containing protein 2<br>OS=Mus musculus<br>GN=Tmed2 PE=1 SV=1           | 6.8E-07 | 40.2 | 10.9 | 7 (7 0 0 0 0) | Cytoplasmic vesicle membrane; Single-pass type I membrane protein. Cytoplasmic vesicle COPI-coated vesicle membrane; Single-pass type I membrane protein. Golgi apparatus membrane; Single-pass type I |

|        |                                                                                                              |         |       |      |                    |                                                                                                                       |
|--------|--------------------------------------------------------------------------------------------------------------|---------|-------|------|--------------------|-----------------------------------------------------------------------------------------------------------------------|
|        |                                                                                                              |         |       |      |                    | membrane protein.                                                                                                     |
| Q8R1V4 | TMED4_MOUSE<br>Transmembrane emp24<br>domain-containing protein 4<br>OS=Mus musculus<br>GN=Tmed4 PE=2 SV=1   | 7.0E-13 | 58.2  | 20.3 | 7 (6 1 0 0 0)      | Endoplasmic<br>reticulum<br>membrane; Single-<br>pass type I<br>membrane protein.                                     |
| Q9CXE7 | TMED5_MOUSE<br>Transmembrane emp24<br>domain-containing protein 5<br>OS=Mus musculus<br>GN=Tmed5 PE=2 SV=1   | 7.6E-06 | 20.1  | 9.2  | 2 (2 0 0 0 0)      | Endoplasmic<br>reticulum<br>membrane; Single-<br>pass type I<br>membrane protein.                                     |
| Q99KF1 | TMED9_MOUSE<br>Transmembrane emp24<br>domain-containing protein 9<br>OS=Mus musculus<br>GN=Tmed9 PE=2 SV=2   | 1.1E-16 | 98.3  | 25.1 | 15 (14 1 0 0<br>0) | Endoplasmic<br>reticulum<br>membrane; Single-<br>pass type I<br>membrane protein.                                     |
| Q9D1D4 | TMEDA_MOUSE<br>Transmembrane emp24<br>domain-containing protein 10<br>OS=Mus musculus<br>GN=Tmed10 PE=2 SV=1 | 3.8E-14 | 100.3 | 36.5 | 21 (21 0 0 0<br>0) | Golgi apparatus<br>membrane; Single-<br>pass type I<br>membrane protein;<br>Lumenal side.<br>Melanosome.              |
| Q5FWI3 | TMEM2_MOUSE<br>Transmembrane protein 2<br>OS=Mus musculus<br>GN=Tmem2 PE=1 SV=1                              | 3.9E-05 | 20.2  | 1.9  | 2 (2 0 0 0 0)      | Membrane; Single-<br>pass membrane<br>protein.                                                                        |
| Q9CR67 | TMM33_MOUSE<br>Transmembrane protein 33<br>OS=Mus musculus<br>GN=Tmem33 PE=2 SV=1                            | 1.2E-08 | 30.2  | 12.6 | 7 (7 0 0 0 0)      | Membrane; Multi-<br>pass membrane<br>protein.<br>Melanosome.                                                          |
| Q9DBS1 | TMM43_MOUSE<br>Transmembrane protein 43<br>OS=Mus musculus<br>GN=Tmem43 PE=1 SV=1                            | 7.4E-14 | 70.2  | 26.0 | 8 (8 0 0 0 0)      | Endoplasmic<br>reticulum. Nucleus<br>inner membrane;<br>Multi-pass<br>membrane protein.                               |
| Q9CZX9 | TMM85_MOUSE<br>Transmembrane protein 85<br>OS=Mus musculus<br>GN=Tmem85 PE=2 SV=1                            | 2.2E-08 | 20.2  | 15.8 | 2 (2 0 0 0 0)      | Membrane; Multi-<br>pass membrane<br>protein.                                                                         |
| Q8BRH0 | TMTC3_MOUSE<br>Transmembrane and TPR<br>repeat-containing protein 3<br>OS=Mus musculus<br>GN=Tmtc3 PE=2 SV=2 | 2.7E-08 | 50.2  | 7.6  | 5 (5 0 0 0 0)      | Membrane; Multi-<br>pass membrane<br>protein.                                                                         |
| Q8VBT0 | TMX1_MOUSE<br>Thioredoxin-related<br>transmembrane protein 1<br>OS=Mus musculus<br>GN=Tmx1 PE=1 SV=1         | 1.4E-09 | 30.2  | 12.9 | 6 (6 0 0 0 0)      | Membrane; Single-<br>pass type I<br>membrane protein.<br>Endoplasmic<br>reticulum<br>membrane; Single-<br>pass type I |

|        |                                                                                                                 |         |       |      |                 |                                                               |
|--------|-----------------------------------------------------------------------------------------------------------------|---------|-------|------|-----------------|---------------------------------------------------------------|
|        |                                                                                                                 |         |       |      |                 | membrane protein.                                             |
| Q9D710 | TMX2_MOUSE<br>Thioredoxin-related<br>transmembrane protein 2<br>OS=Mus musculus<br>GN=Txm2 PE=2 SV=1            | 1.5E-05 | 20.1  | 7.5  | 2 (2 0 0 0 0)   | Membrane; Single-pass type I membrane protein.                |
| Q8BXZ1 | TMX3_MOUSE Protein<br>disulfide-isomerase TMX3<br>OS=Mus musculus<br>GN=Txm3 PE=1 SV=2                          | 1.0E-11 | 40.2  | 9.0  | 6 (6 0 0 0 0)   | Endoplasmic reticulum membrane; Single-pass membrane protein. |
| Q8BFY9 | TNPO1_MOUSE<br>Transportin-1 OS=Mus<br>musculus GN=Tnp1 PE=1<br>SV=2                                            | 9.6E-07 | 30.1  | 3.7  | 3 (3 0 0 0 0)   | Cytoplasm.<br>Nucleus.                                        |
| Q8BYU6 | TOIP2_MOUSE Torsin-1A-<br>interacting protein 2<br>OS=Mus musculus<br>GN=Tor1aip2 PE=1 SV=1                     | 4.2E-08 | 50.2  | 12.5 | 6 (6 0 0 0 0)   | Endoplasmic reticulum membrane; Single-pass membrane protein. |
| Q9CPQ3 | TOM22_MOUSE<br>Mitochondrial import<br>receptor subunit TOM22<br>homolog OS=Mus musculus<br>GN=Tomm22 PE=2 SV=3 | 5.6E-15 | 70.3  | 62.7 | 10 (10 0 0 0 0) | Mitochondrion outer membrane; Single-pass membrane protein.   |
| Q9QYA2 | TOM40_MOUSE<br>Mitochondrial import<br>receptor subunit TOM40<br>homolog OS=Mus musculus<br>GN=Tomm40 PE=1 SV=3 | 2.3E-10 | 70.3  | 18.0 | 7 (7 0 0 0 0)   | Mitochondrion outer membrane; Multi-pass membrane protein.    |
| Q9CZW5 | TOM70_MOUSE<br>Mitochondrial import<br>receptor subunit TOM70<br>OS=Mus musculus<br>GN=Tomm70a PE=1 SV=1        | 8.0E-11 | 130.2 | 16.7 | 17 (17 0 0 0 0) | Mitochondrion outer membrane; Single-pass membrane protein.   |
| Q9Z0L0 | TPBG_MOUSE Trophoblast<br>glycoprotein OS=Mus<br>musculus GN=Tpbg PE=1<br>SV=2                                  | 3.0E-08 | 30.2  | 10.8 | 4 (4 0 0 0 0)   | Membrane; Single-pass type I membrane protein.                |
| P17751 | TPIS_MOUSE<br>Triosephosphate isomerase<br>OS=Mus musculus GN=Tpi1<br>PE=1 SV=3                                 | 7.2E-11 | 30.2  | 16.1 | 3 (3 0 0 0 0)   | ND                                                            |
| P58771 | TPM1_MOUSE<br>Tropomyosin alpha-1 chain<br>OS=Mus musculus<br>GN=Tpm1 PE=1 SV=1                                 | 3.3E-08 | 50.2  | 13.4 | 7 (7 0 0 0 0)   | Cytoplasm $\hat{a}$ cytoskeleton.                             |
| P21107 | TPM3_MOUSE<br>Tropomyosin alpha-3 chain<br>OS=Mus musculus<br>GN=Tpm3 PE=1 SV=2                                 | 7.0E-08 | 30.2  | 11.3 | 3 (3 0 0 0 0)   | Cytoplasm $\hat{a}$ cytoskeleton.                             |

*A novel role of mitochondria in muscle injury*

|        |                                                                                                                                |         |      |      |                    |                                                                                                    |
|--------|--------------------------------------------------------------------------------------------------------------------------------|---------|------|------|--------------------|----------------------------------------------------------------------------------------------------|
| Q6IRU2 | TPM4_MOUSE<br>Tropomyosin alpha-4 chain<br>OS=Mus musculus<br>GN=Tpm4 PE=2 SV=3                                                | 3.4E-10 | 50.2 | 25.4 | 7 (7 0 0 0 0)      | Cytoplasm &°<br>cytoskeleton.                                                                      |
| Q64514 | TPP2_MOUSE Tripeptidyl-<br>peptidase 2 OS=Mus<br>musculus GN=Tpp2 PE=2<br>SV=3                                                 | 7.4E-08 | 20.1 | 1.7  | 2 (2 0 0 0 0)      | Cytoplasm.<br>Nucleus.                                                                             |
| Q9R233 | TPSN_MOUSE Tapasin<br>OS=Mus musculus<br>GN=Tapbp PE=2 SV=2                                                                    | 4.6E-13 | 90.3 | 17.8 | 29 (29 0 0 0<br>0) | Endoplasmic<br>reticulum<br>membrane; Single-<br>pass type I<br>membrane protein.                  |
| O88856 | TPST2_MOUSE Protein-<br>tyrosine sulfotransferase 2<br>OS=Mus musculus<br>GN=Tpst2 PE=1 SV=1                                   | 8.4E-06 | 30.2 | 8.8  | 4 (4 0 0 0 0)      | Golgi apparatus<br>membrane; Single-<br>pass type II<br>membrane protein.                          |
| Q9CQN1 | TRAP1_MOUSE Heat shock<br>protein 75 kDa,<br>mitochondrial OS=Mus<br>musculus GN=Trap1 PE=1<br>SV=1                            | 2.7E-12 | 80.2 | 14.7 | 8 (8 0 0 0 0)      | Mitochondrion.                                                                                     |
| Q7TN37 | TRPM4_MOUSE Transient<br>receptor potential cation<br>channel subfamily M<br>member 4 OS=Mus<br>musculus GN=Trpm4 PE=2<br>SV=1 | 7.3E-09 | 30.2 | 3.8  | 3 (3 0 0 0 0)      | Cell membrane;<br>Multi-pass<br>membrane protein.<br>Endoplasmic<br>reticulum. Golgi<br>apparatus. |
| P35441 | TSP1_MOUSE<br>Thrombospondin-1 OS=Mus<br>musculus GN=Thbs1 PE=1<br>SV=1                                                        | 1.0E-05 | 40.1 | 3.6  | 4 (4 0 0 0 0)      | ND                                                                                                 |
| Q9CRD2 | TTC35_MOUSE<br>Tetratricopeptide repeat<br>protein 35 OS=Mus<br>musculus GN=Ttc35 PE=2<br>SV=1                                 | 2.1E-08 | 60.2 | 25.9 | 7 (7 0 0 0 0)      | Nucleus.                                                                                           |
| Q8K2W3 | TXD11_MOUSE<br>Thioredoxin domain-<br>containing protein 11<br>OS=Mus musculus<br>GN=Txndc11 PE=2 SV=1                         | 4.5E-05 | 20.1 | 2.1  | 2 (2 0 0 0 0)      | Endoplasmic<br>reticulum<br>membrane; Single-<br>pass membrane<br>protein.                         |
| Q91W90 | TXND5_MOUSE<br>Thioredoxin domain-<br>containing protein 5<br>OS=Mus musculus<br>GN=Txndc5 PE=1 SV=2                           | 3.8E-09 | 30.2 | 7.7  | 5 (5 0 0 0 0)      | Endoplasmic<br>reticulum lumen.                                                                    |
| Q8CGB3 | UACA_MOUSE Uveal<br>autoantigen with coiled-coil<br>domains and ankyrin repeats<br>OS=Mus musculus<br>GN=Uaca PE=1 SV=2        | 6.4E-09 | 20.2 | 1.7  | 2 (2 0 0 0 0)      | Nucleus.<br>Cytoplasm.<br>Cytoplasm &°<br>cytoskeleton.                                            |
| Q9CZY3 | UB2V1_MOUSE Ubiquitin-<br>conjugating enzyme E2<br>variant 1 OS=Mus musculus                                                   | 1.1E-04 | 20.1 | 13.6 | 2 (2 0 0 0 0)      | Nucleus.                                                                                           |



|        |                                                                                                       |         |       |      |                 |                                                                                       |
|--------|-------------------------------------------------------------------------------------------------------|---------|-------|------|-----------------|---------------------------------------------------------------------------------------|
|        | GN=Ube2v1 PE=1 SV=1                                                                                   |         |       |      |                 |                                                                                       |
| Q02053 | UBA1_MOUSE Ubiquitin-like modifier-activating enzyme 1 OS=Mus musculus GN=Uba1 PE=1 SV=1              | 4.3E-09 | 40.2  | 5.9  | 5 (5 0 0 0 0)   | ND                                                                                    |
| P61089 | UBE2N_MOUSE Ubiquitin-conjugating enzyme E2 N OS=Mus musculus GN=Ube2n PE=1 SV=1                      | 1.4E-05 | 30.2  | 25.0 | 3 (3 0 0 0 0)   | Nucleus.<br>Cytoplasm.                                                                |
| P62991 | UBIQ_MOUSE Ubiquitin OS=Mus musculus GN=Rps27a PE=1 SV=1                                              | 1.1E-09 | 50.2  | 61.8 | 81 (81 0 0 0 0) | ND                                                                                    |
| P21126 | UBL4A_MOUSE Ubiquitin-like protein 4A OS=Mus musculus GN=Ubl4a PE=2 SV=1                              | 8.7E-07 | 20.2  | 15.9 | 3 (3 0 0 0 0)   | Cytoplasm &°<br>cytosol.                                                              |
| Q9JMA1 | UBP14_MOUSE Ubiquitin carboxyl-terminal hydrolase 14 OS=Mus musculus GN=Usp14 PE=1 SV=3               | 2.1E-08 | 20.1  | 4.9  | 2 (2 0 0 0 0)   | Cytoplasm. Cell membrane;<br>Peripheral membrane protein.                             |
| Q91WB7 | UBTD1_MOUSE Ubiquitin domain-containing protein 1 OS=Mus musculus GN=Ubt1 PE=2 SV=1                   | 1.1E-07 | 40.2  | 16.3 | 5 (5 0 0 0 0)   | ND                                                                                    |
| Q6PGH0 | UBTD2_MOUSE Ubiquitin domain-containing protein 2 OS=Mus musculus GN=Ubt2 PE=2 SV=1                   | 1.7E-08 | 30.2  | 9.8  | 3 (3 0 0 0 0)   | Cytoplasm.                                                                            |
| Q8VCH8 | UBXN4_MOUSE UBX domain-containing protein 4 OS=Mus musculus GN=Ubxn4 PE=1 SV=1                        | 2.1E-14 | 30.3  | 9.7  | 3 (3 0 0 0 0)   | Endoplasmic reticulum membrane;<br>Peripheral membrane protein.<br>Nucleus envelope.  |
| Q9CR68 | UCRI_MOUSE Cytochrome b-c1 complex subunit Rieske, mitochondrial OS=Mus musculus GN=Uqcrfs1 PE=1 SV=1 | 7.1E-08 | 30.2  | 11.3 | 3 (3 0 0 0 0)   | Mitochondrion inner membrane.                                                         |
| O70475 | UGDH_MOUSE UDP-glucose 6-dehydrogenase OS=Mus musculus GN=Ugdh PE=1 SV=1                              | 1.9E-07 | 30.2  | 7.3  | 3 (3 0 0 0 0)   | ND                                                                                    |
| Q6P5E4 | UGGG1_MOUSE UDP-glucose:glycoprotein glucosyltransferase 1 OS=Mus musculus GN=Uggt1 PE=1 SV=3         | 4.4E-15 | 150.3 | 14.1 | 17 (17 0 0 0 0) | Endoplasmic reticulum lumen.<br>Endoplasmic reticulum-Golgi intermediate compartment. |
| Q9CQ56 | USE1_MOUSE Vesicle transport protein USE1 OS=Mus musculus GN=Use1 PE=2 SV=1                           | 3.1E-08 | 40.2  | 17.0 | 4 (4 0 0 0 0)   | Endoplasmic reticulum membrane; Single-pass type IV                                   |

|        |                                                                                                       |         |       |      |                 |                                                                                                                                                               |
|--------|-------------------------------------------------------------------------------------------------------|---------|-------|------|-----------------|---------------------------------------------------------------------------------------------------------------------------------------------------------------|
|        |                                                                                                       |         |       |      |                 | membrane protein.                                                                                                                                             |
| Q9Z1Z0 | USO1_MOUSE General vesicular transport factor p115 OS=Mus musculus GN=Uso1 PE=1 SV=2                  | 9.6E-11 | 20.2  | 2.6  | 2 (2 0 0 0 0)   | Cytoplasmic vesicle membrane; Golgi apparatus membrane; Peripheral membrane protein.                                                                          |
| P51863 | VA0D1_MOUSE V-type proton ATPase subunit d 1 OS=Mus musculus GN=Atp6v0d1 PE=1 SV=2                    | 5.5E-09 | 20.2  | 6.8  | 3 (3 0 0 0 0)   | ND                                                                                                                                                            |
| P63044 | VAMP2_MOUSE Vesicle-associated membrane protein 2 OS=Mus musculus GN=Vamp2 PE=1 SV=2                  | 1.3E-11 | 20.3  | 20.7 | 5 (5 0 0 0 0)   | Cytoplasmic vesicle membrane; secretory vesicle membrane; synaptic vesicle membrane; Single-pass type IV membrane protein. Cell junction synapse synaptosome. |
| P63024 | VAMP3_MOUSE Vesicle-associated membrane protein 3 OS=Mus musculus GN=Vamp3 PE=1 SV=1                  | 3.1E-11 | 20.3  | 16.5 | 4 (4 0 0 0 0)   | Membrane; Single-pass type IV membrane protein. Cell junction synapse synaptosome.                                                                            |
| O70480 | VAMP4_MOUSE Vesicle-associated membrane protein 4 OS=Mus musculus GN=Vamp4 PE=1 SV=1                  | 1.2E-09 | 20.2  | 10.6 | 2 (2 0 0 0 0)   | Golgi apparatus trans-Golgi network membrane; Single-pass type IV membrane protein.                                                                           |
| O70404 | VAMP8_MOUSE Vesicle-associated membrane protein 8 OS=Mus musculus GN=Vamp8 PE=1 SV=1                  | 5.9E-07 | 40.2  | 40.6 | 4 (4 0 0 0 0)   | Membrane; Single-pass type IV membrane protein.                                                                                                               |
| Q9WV55 | VAPA_MOUSE Vesicle-associated membrane protein-associated protein A OS=Mus musculus GN=Vapa PE=1 SV=2 | 5.6E-15 | 140.3 | 29.3 | 37 (37 0 0 0 0) | Endoplasmic reticulum membrane; Single-pass type IV membrane protein.                                                                                         |
| Q9QY76 | VAPB_MOUSE Vesicle-associated membrane protein-associated protein B OS=Mus musculus GN=Vapb PE=2 SV=3 | 2.6E-09 | 40.2  | 16.9 | 6 (6 0 0 0 0)   | Endoplasmic reticulum membrane; Single-pass type IV membrane protein.                                                                                         |
| Q9R1Q9 | VAS1_MOUSE V-type proton ATPase subunit S1 OS=Mus musculus GN=Atp6ap1 PE=1 SV=1                       | 1.0E-10 | 30.3  | 9.1  | 3 (3 0 0 0 0)   | Vacuole membrane; Single-pass membrane protein.                                                                                                               |
| Q62465 | VAT1_MOUSE Synaptic vesicle membrane protein                                                          | 1.9E-08 | 40.2  | 10.8 | 4 (4 0 0 0 0)   | Cytoplasm.                                                                                                                                                    |

|        |                                                                                                    |         |       |      |                 |                                                                                                                                           |  |
|--------|----------------------------------------------------------------------------------------------------|---------|-------|------|-----------------|-------------------------------------------------------------------------------------------------------------------------------------------|--|
|        | VAT-1 homolog OS=Mus musculus GN=Vat1 PE=2 SV=3                                                    |         |       |      |                 |                                                                                                                                           |  |
| P29533 | VCAM1_MOUSE Vascular cell adhesion protein 1 OS=Mus musculus GN=Vcam1 PE=1 SV=1                    | 8.5E-12 | 160.3 | 22.3 | 25 (25 0 0 0 0) | Cell membrane; Single-pass type I membrane protein. Cell membrane; Lipid-anchor ° GPI-anchor.                                             |  |
| Q60932 | VDAC1_MOUSE Voltage-dependent anion-selective channel protein 1 OS=Mus musculus GN=Vdac1 PE=1 SV=3 | 1.0E-30 | 116.3 | 51.7 | 25 (20 5 0 0 0) | Mitochondrion outer membrane; Multi-pass membrane protein. Cell membrane; Multi-pass membrane protein.                                    |  |
| Q60930 | VDAC2_MOUSE Voltage-dependent anion-selective channel protein 2 OS=Mus musculus GN=Vdac2 PE=1 SV=2 | 8.8E-12 | 68.2  | 21.7 | 14 (11 3 0 0 0) | Mitochondrion outer membrane.                                                                                                             |  |
| Q60931 | VDAC3_MOUSE Voltage-dependent anion-selective channel protein 3 OS=Mus musculus GN=Vdac3 PE=1 SV=1 | 8.9E-15 | 40.3  | 17.7 | 5 (5 0 0 0 0)   | Mitochondrion outer membrane.                                                                                                             |  |
| Q8VDJ3 | VIGLN_MOUSE Vigilin OS=Mus musculus GN=Hdlbp PE=1 SV=1                                             | 1.7E-08 | 20.2  | 2.1  | 2 (2 0 0 0 0)   | Cytoplasm. Nucleus.                                                                                                                       |  |
| P20152 | VIME_MOUSE Vimentin OS=Mus musculus GN=Vim PE=1 SV=3                                               | 5.6E-15 | 314.3 | 52.1 | 99 (97 1 0 1 0) | ND                                                                                                                                        |  |
| Q64727 | VINC_MOUSE Vinculin OS=Mus musculus GN=Vcl PE=1 SV=4                                               | 1.0E-30 | 260.3 | 29.0 | 26 (26 0 0 0 0) | Cytoplasm ° cytoskeleton. Cell junction ° adherens junction. Cell membrane; Peripheral membrane protein; Cytoplasmic side. Cell junction. |  |
| P15920 | VPP2_MOUSE V-type proton ATPase 116 kDa subunit a isoform 2 OS=Mus musculus GN=Atp6v0a2 PE=1 SV=2  | 1.0E-11 | 30.2  | 4.4  | 3 (3 0 0 0 0)   | Cell membrane; Multi-pass membrane protein. Endosome membrane.                                                                            |  |
| Q9EQH3 | VPS35_MOUSE Vacuolar protein sorting-associated protein 35 OS=Mus musculus GN=Vps35 PE=1 SV=1      | 2.1E-06 | 20.2  | 3.1  | 2 (2 0 0 0 0)   | Cytoplasm. Membrane; Peripheral membrane protein.                                                                                         |  |
| P97390 | VPS45_MOUSE Vacuolar protein sorting-associated protein 45 OS=Mus musculus GN=Vps45 PE=1           | 9.1E-07 | 30.1  | 6.1  | 3 (3 0 0 0 0)   | Golgi apparatus membrane; Peripheral membrane protein.                                                                                    |  |

*A novel role of mitochondria in muscle injury*

|        |                                                                                                  |         |      |      |               |                                                                                                                   |
|--------|--------------------------------------------------------------------------------------------------|---------|------|------|---------------|-------------------------------------------------------------------------------------------------------------------|
|        | SV=1                                                                                             |         |      |      |               | Endosome membrane; Peripheral membrane protein.                                                                   |
| O88342 | WDR1_MOUSE WD repeat-containing protein 1<br>OS=Mus musculus<br>GN=Wdr1 PE=1 SV=3                | 4.7E-06 | 20.1 | 3.1  | 2 (2 0 0 0 0) | Cytoplasm &° cytoskeleton.                                                                                        |
| P56695 | WFS1_MOUSE Wolframin<br>OS=Mus musculus<br>GN=Wfs1 PE=1 SV=1                                     | 1.5E-07 | 50.2 | 7.6  | 8 (8 0 0 0 0) | Endoplasmic reticulum membrane; Multi-pass membrane protein.                                                      |
| Q6P5F9 | XPO1_MOUSE Exportin-1<br>OS=Mus musculus<br>GN=Xpo1 PE=1 SV=1                                    | 9.6E-05 | 20.2 | 2.1  | 2 (2 0 0 0 0) | Cytoplasm. Nucleus &° nucleoplasm. Nucleus &° Cajal body. Nucleus &° nucleolus.                                   |
| Q924C1 | XPO5_MOUSE Exportin-5<br>OS=Mus musculus<br>GN=Xpo5 PE=2 SV=1                                    | 8.5E-08 | 20.2 | 2.1  | 2 (2 0 0 0 0) | Nucleus. Cytoplasm.                                                                                               |
| Q9EPK2 | XRP2_MOUSE Protein XRP2<br>OS=Mus musculus<br>GN=Rp2 PE=2 SV=3                                   | 1.6E-06 | 30.2 | 8.9  | 3 (3 0 0 0 0) | Cell membrane; Lipid-anchor; Cytoplasmic side.                                                                    |
| P62960 | YBOX1_MOUSE Nuclease-sensitive element-binding protein 1<br>OS=Mus musculus<br>GN=Ybx1 PE=1 SV=3 | 1.0E-14 | 20.2 | 15.2 | 3 (3 0 0 0 0) | Cytoplasm. Nucleus. Cytoplasmic granule. Secreted.                                                                |
| Q9CX30 | YIF1B_MOUSE Protein YIF1B<br>OS=Mus musculus<br>GN=Yif1b PE=2 SV=2                               | 1.6E-09 | 30.2 | 12.2 | 4 (4 0 0 0 0) | Membrane; Multi-pass membrane protein.                                                                            |
| O88967 | YME1L1_MOUSE ATP-dependent metalloprotease<br>YME1L1 OS=Mus musculus<br>GN=Yme1l1 PE=2 SV=1      | 1.9E-12 | 80.3 | 17.2 | 8 (8 0 0 0 0) | Mitochondrion.                                                                                                    |
| Q9CWU2 | ZDH13_MOUSE Probable palmitoyltransferase<br>ZDHHC13 OS=Mus musculus<br>GN=Zdhhc13 PE=2 SV=2     | 6.3E-06 | 20.2 | 3.7  | 2 (2 0 0 0 0) | Golgi apparatus membrane; Multi-pass membrane protein. Cytoplasmic vesicle membrane; Multi-pass membrane protein. |
| Q9DB43 | ZFPL1_MOUSE Zinc finger protein-like 1<br>OS=Mus musculus<br>GN=Zfp11 PE=2 SV=1                  | 1.4E-07 | 20.2 | 5.8  | 2 (2 0 0 0 0) | Golgi apparatus &° cis-Golgi network membrane; Single-pass membrane protein.                                      |
| Q62523 | ZYX_MOUSE Zyxin<br>OS=Mus musculus<br>GN=Zyx PE=1 SV=1                                           | 2.0E-10 | 30.2 | 8.3  | 4 (4 0 0 0 0) | Cytoplasm. Cytoplasm &° cytoskeleton. Cell junction &° focal adhesion. Nucleus.                                   |

Table s4

| Accession | Reference                                                                                                                         | P (pro) | Score | Coverage | Peptide (Hits)  | Subcellular locations                |
|-----------|-----------------------------------------------------------------------------------------------------------------------------------|---------|-------|----------|-----------------|--------------------------------------|
| Q9CQV8    | 1433B_MOUSE 14-3-3 protein beta/alpha OS=Mus musculus GN=Ywhab PE=1 SV=3                                                          | 1.7E-11 | 38.2  | 15.4     | 5 (4 1 0 0 0)   | Cytoplasm. Melanosome.               |
| P62259    | 1433E_MOUSE 14-3-3 protein epsilon OS=Mus musculus GN=Ywhae PE=1 SV=1                                                             | 3.8E-09 | 98.2  | 32.5     | 12 (11 1 0 0 0) | Cytoplasm. Melanosome.               |
| P68510    | 1433F_MOUSE 14-3-3 protein eta OS=Mus musculus GN=Ywhah PE=1 SV=2                                                                 | 5.8E-04 | 14.2  | 6.5      | 2 (0 1 1 0 0)   | Cytoplasm.                           |
| P61982    | 1433G_MOUSE 14-3-3 protein gamma OS=Mus musculus GN=Ywhag PE=1 SV=2                                                               | 1.0E-30 | 50.3  | 25.9     | 6 (6 0 0 0 0)   | Cytoplasm.                           |
| P63101    | 1433Z_MOUSE 14-3-3 protein zeta/delta OS=Mus musculus GN=Ywhaz PE=1 SV=1                                                          | 2.6E-09 | 20.2  | 10.6     | 2 (2 0 0 0 0)   | Cytoplasm. Melanosome.               |
| Q76MZ3    | 2AAA_MOUSE Serine/threonine-protein phosphatase 2A 65 kDa regulatory subunit A alpha isoform OS=Mus musculus GN=Ppp2r1a PE=1 SV=3 | 1.3E-14 | 140.3 | 27.0     | 19 (19 0 0 0 0) | Cytoplasm. Chromosome centromere.    |
| Q99L13    | 3HIDH_MOUSE 3-hydroxyisobutyrate dehydrogenase, mitochondrial OS=Mus musculus GN=Hibadh PE=2 SV=1                                 | 1.4E-12 | 20.2  | 7.2      | 4 (4 0 0 0 0)   | Mitochondrion.                       |
| Q61838    | A2M_MOUSE Alpha-2-macroglobulin OS=Mus musculus GN=A2m PE=1 SV=2                                                                  | 6.1E-11 | 50.3  | 4.7      | 5 (5 0 0 0 0)   | Secreted.                            |
| P05201    | AATC_MOUSE Aspartate aminotransferase, cytoplasmic OS=Mus musculus GN=Got1 PE=1 SV=2                                              | 8.8E-11 | 90.2  | 27.4     | 12 (12 0 0 0 0) | Cytoplasm.                           |
| P05202    | AATM_MOUSE Aspartate aminotransferase, mitochondrial OS=Mus musculus GN=Got2 PE=1 SV=1                                            | 7.4E-09 | 100.3 | 21.6     | 26 (26 0 0 0 0) | Mitochondrion matrix. Cell membrane. |
| P61222    | ABCE1_MOUSE ATP-binding cassette sub-family E member 1 OS=Mus musculus GN=Abce1 PE=2 SV=1                                         | 3.9E-06 | 30.2  | 6.0      | 3 (3 0 0 0 0)   | Cytoplasm. Mitochondrion.            |
| Q9WV35    | ABEC2_MOUSE Probable                                                                                                              | 5.9E-04 | 20.1  | 9.8      | 2 (2 0 0 0 0)   | ND                                   |

|        |                                                                                                                               |         |       |      |                    |                                                                                                                                                                                          |
|--------|-------------------------------------------------------------------------------------------------------------------------------|---------|-------|------|--------------------|------------------------------------------------------------------------------------------------------------------------------------------------------------------------------------------|
|        | C->U-editing enzyme<br>APOBEC-2 OS=Mus<br>musculus GN=Apobec2<br>PE=1 SV=1                                                    |         |       |      | 0)                 |                                                                                                                                                                                          |
| Q5SWU9 | ACACA_MOUSE Acetyl-<br>CoA carboxylase 1 OS=Mus<br>musculus GN=Acaca PE=1<br>SV=1                                             | 7.2E-08 | 40.2  | 2.0  | 4 (4 0 0 0<br>0)   | Cytoplasm.                                                                                                                                                                               |
| P51174 | ACADL_MOUSE Long-<br>chain specific acyl-CoA<br>dehydrogenase,<br>mitochondrial OS=Mus<br>musculus GN=Acadl PE=2<br>SV=2      | 3.4E-10 | 110.2 | 19.5 | 22 (22 0 0<br>0 0) | Mitochondrion<br>matrix.                                                                                                                                                                 |
| P45952 | ACADM_MOUSE Medium-<br>chain specific acyl-CoA<br>dehydrogenase,<br>mitochondrial OS=Mus<br>musculus GN=Acadm PE=1<br>SV=1    | 4.2E-10 | 60.2  | 15.9 | 11 (11 0 0<br>0 0) | Mitochondrion<br>matrix.                                                                                                                                                                 |
| Q07417 | ACADS_MOUSE Short-<br>chain specific acyl-CoA<br>dehydrogenase,<br>mitochondrial OS=Mus<br>musculus GN=Acads PE=2<br>SV=1     | 1.2E-08 | 50.2  | 12.9 | 5 (5 0 0 0<br>0)   | Mitochondrion<br>matrix.                                                                                                                                                                 |
| P50544 | ACADV_MOUSE Very<br>long-chain specific acyl-CoA<br>dehydrogenase,<br>mitochondrial OS=Mus<br>musculus GN=Acadv1 PE=1<br>SV=3 | 1.8E-12 | 150.3 | 36.1 | 30 (30 0 0<br>0 0) | Mitochondrion<br>inner membrane.                                                                                                                                                         |
| Q8K370 | ACD10_MOUSE Acyl-CoA<br>dehydrogenase family<br>member 10 OS=Mus<br>musculus GN=Acad10 PE=2<br>SV=1                           | 8.0E-08 | 20.2  | 2.2  | 2 (2 0 0 0<br>0)   | ND                                                                                                                                                                                       |
| P09470 | ACE_MOUSE Angiotensin-<br>converting enzyme OS=Mus<br>musculus GN=Ace PE=1<br>SV=3                                            | 2.8E-09 | 20.2  | 2.1  | 2 (2 0 0 0<br>0)   | Secreted. Cell<br>membrane; Single-<br>pass type I<br>membrane protein.                                                                                                                  |
| Q99K10 | ACON_MOUSE Aconitate<br>hydratase, mitochondrial<br>OS=Mus musculus<br>GN=Aco2 PE=1 SV=1                                      | 3.7E-14 | 214.3 | 28.6 | 62 (55 3 4<br>0 0) | Mitochondrion.                                                                                                                                                                           |
| P41216 | ACSL1_MOUSE Long-<br>chain-fatty-acid--CoA ligase<br>1 OS=Mus musculus<br>GN=Acs11 PE=1 SV=1                                  | 1.1E-15 | 150.3 | 21.3 | 37 (37 0 0<br>0 0) | Mitochondrion<br>outer membrane;<br>Single-pass type III<br>membrane protein.<br>Peroxisome<br>membrane; Single-<br>pass type III<br>membrane protein.<br>Microsome<br>membrane; Single- |

|        |                                                                                                      |         |       |      |                   |                                                                                                                                                                                                                                   |
|--------|------------------------------------------------------------------------------------------------------|---------|-------|------|-------------------|-----------------------------------------------------------------------------------------------------------------------------------------------------------------------------------------------------------------------------------|
|        |                                                                                                      |         |       |      |                   | pass type III membrane protein. Endoplasmic reticulum membrane; Single-pass type III membrane protein.                                                                                                                            |
| P62737 | ACTA_MOUSE Actin, aortic smooth muscle OS=Mus musculus GN=Acta2 PE=1 SV=1                            | 1.0E-30 | 246.3 | 48.5 | 209 (207 2 0 0 0) | Cytoplasm $\hat{\epsilon}^{\circ}$ cytoskeleton.                                                                                                                                                                                  |
| P60710 | ACTB_MOUSE Actin, cytoplasmic 1 OS=Mus musculus GN=Actb PE=1 SV=1                                    | 7.0E-13 | 50.3  | 16.0 | 23 (23 0 0 0 0)   | Cytoplasm $\hat{\epsilon}^{\circ}$ cytoskeleton.                                                                                                                                                                                  |
| Q8BFZ3 | ACTBL_MOUSE Beta-actin-like protein 2 OS=Mus musculus GN=Actbl2 PE=2 SV=1                            | 1.0E-30 | 44.3  | 21.5 | 13 (7 5 1 0 0)    | Cytoplasm $\hat{\epsilon}^{\circ}$ cytoskeleton.                                                                                                                                                                                  |
| Q7TPR4 | ACTN1_MOUSE Alpha-actinin-1 OS=Mus musculus GN=Actn1 PE=2 SV=1                                       | 1.9E-08 | 90.2  | 10.1 | 27 (27 0 0 0 0)   | Cytoplasm $\hat{\epsilon}^{\circ}$ cytoskeleton. Cytoplasm $\hat{\epsilon}^{\circ}$ myofibril $\hat{\epsilon}^{\circ}$ sarcomere $\hat{\epsilon}^{\circ}$ Z line. Cell membrane. Cell projection $\hat{\epsilon}^{\circ}$ ruffle. |
| Q9JI91 | ACTN2_MOUSE Alpha-actinin-2 OS=Mus musculus GN=Actn2 PE=1 SV=1                                       | 2.2E-15 | 340.3 | 38.0 | 131 (131 0 0 0 0) | Cytoplasm $\hat{\epsilon}^{\circ}$ myofibril $\hat{\epsilon}^{\circ}$ sarcomere $\hat{\epsilon}^{\circ}$ Z line.                                                                                                                  |
| O88990 | ACTN3_MOUSE Alpha-actinin-3 OS=Mus musculus GN=Actn3 PE=2 SV=1                                       | 1.0E-30 | 320.3 | 33.2 | 143 (141 2 0 0 0) | ND                                                                                                                                                                                                                                |
| P68134 | ACTS_MOUSE Actin, alpha skeletal muscle OS=Mus musculus GN=Acta1 PE=1 SV=1                           | 5.7E-14 | 60.3  | 5.8  | 16 (12 4 0 0 0)   | Cytoplasm $\hat{\epsilon}^{\circ}$ cytoskeleton.                                                                                                                                                                                  |
| Q60936 | ADCK3_MOUSE Chaperone activity of bc1 complex-like, mitochondrial OS=Mus musculus GN=Cabc1 PE=2 SV=2 | 2.2E-13 | 60.3  | 13.0 | 19 (19 0 0 0 0)   | Mitochondrion.                                                                                                                                                                                                                    |
| Q8BLF1 | ADCL1_MOUSE Neutral cholesterol ester hydrolase 1 OS=Mus musculus GN=Nceh1 PE=1 SV=1                 | 1.0E-30 | 20.4  | 9.8  | 4 (4 0 0 0 0)     | Membrane; Single-pass type II membrane protein. Microsome.                                                                                                                                                                        |
| P48962 | ADT1_MOUSE ADP/ATP translocase 1 OS=Mus musculus GN=Slc25a4 PE=1 SV=4                                | 5.5E-11 | 98.2  | 25.8 | 123 (122 1 0 0 0) | Mitochondrion inner membrane; Multi-pass membrane protein.                                                                                                                                                                        |
| P51881 | ADT2_MOUSE ADP/ATP translocase 2 OS=Mus musculus GN=Slc25a5 PE=1                                     | 5.0E-08 | 18.2  |      | 3 (1 2 0 0 0)     | Mitochondrion inner membrane; Multi-pass                                                                                                                                                                                          |

*A novel role of mitochondria in muscle injury*

|        |                                                                                                                        |         |       |      |                   |                                                                                                                              |
|--------|------------------------------------------------------------------------------------------------------------------------|---------|-------|------|-------------------|------------------------------------------------------------------------------------------------------------------------------|
|        | SV=3                                                                                                                   |         |       |      |                   | membrane protein.                                                                                                            |
| Q9Z0X1 | AIFM1_MOUSE Apoptosis-inducing factor 1, mitochondrial OS=Mus musculus GN=Aifm1 PE=1 SV=1                              | 7.4E-14 | 130.3 | 21.2 | 16 (16 0 0 0 0)   | Mitochondrion intermembrane space. Mitochondrion inner membrane. Cytoplasm. Cytoplasm â€° perinuclear region. Nucleus.       |
| P31230 | AIMP1_MOUSE Aminoacyl tRNA synthetase complex-interacting multifunctional protein 1 OS=Mus musculus GN=Aimp1 PE=1 SV=2 | 3.4E-09 | 30.2  | 15.2 | 4 (4 0 0 0 0)     | Nucleus. Cytoplasm â€° cytosol. Cytoplasmic vesicle â€° secretory vesicle. Secreted. Endoplasmic reticulum. Golgi apparatus. |
| Q8CHT0 | AL4A1_MOUSE Delta-1-pyrroline-5-carboxylate dehydrogenase, mitochondrial OS=Mus musculus GN=Aldh4a1 PE=1 SV=2          | 3.3E-09 | 30.2  | 7.7  | 4 (4 0 0 0 0)     | Mitochondrion matrix.                                                                                                        |
| P07724 | ALBU_MOUSE Serum albumin OS=Mus musculus GN=Alb PE=1 SV=3                                                              | 1.5E-10 | 70.2  | 13.8 | 34 (34 0 0 0 0)   | Secreted.                                                                                                                    |
| P47738 | ALDH2_MOUSE Aldehyde dehydrogenase, mitochondrial OS=Mus musculus GN=Aldh2 PE=1 SV=1                                   | 9.8E-13 | 120.3 | 29.9 | 21 (21 0 0 0 0)   | Mitochondrion matrix.                                                                                                        |
| P05064 | ALDOA_MOUSE Fructose-bisphosphate aldolase A OS=Mus musculus GN=Aldoa PE=1 SV=2                                        | 1.0E-30 | 270.3 | 57.4 | 409 (407 2 0 0 0) | ND                                                                                                                           |
| Q3V1D3 | AMPD1_MOUSE AMP deaminase 1 OS=Mus musculus GN=Ampd1 PE=2 SV=1                                                         | 4.7E-11 | 180.3 | 31.7 | 36 (36 0 0 0 0)   | ND                                                                                                                           |
| P16406 | AMPE_MOUSE Glutamyl aminopeptidase OS=Mus musculus GN=Enpep PE=1 SV=1                                                  | 1.7E-13 | 30.2  | 5.3  | 3 (3 0 0 0 0)     | Membrane; Single-pass type II membrane protein.                                                                              |
| Q9CPY7 | AMPL_MOUSE Cytosol aminopeptidase OS=Mus musculus GN=Lap3 PE=1 SV=3                                                    | 2.5E-07 | 20.2  | 4.6  | 2 (2 0 0 0 0)     | Cytoplasm.                                                                                                                   |
| P97449 | AMPN_MOUSE Aminopeptidase N OS=Mus musculus GN=Anpep PE=1 SV=4                                                         | 3.4E-13 | 50.3  | 9.2  | 10 (10 0 0 0 0)   | Membrane; Single-pass type II membrane protein.                                                                              |



*A novel role of mitochondria in muscle injury*

|        |                                                                                            |         |       |      |                   |                                                                                                                                          |
|--------|--------------------------------------------------------------------------------------------|---------|-------|------|-------------------|------------------------------------------------------------------------------------------------------------------------------------------|
| Q9WV06 | ANKR2_MOUSE Ankyrin repeat domain-containing protein 2 OS=Mus musculus GN=Ankrd2 PE=2 SV=2 | 8.2E-11 | 40.3  | 13.1 | 9 (9 0 0 0 0)     | ND                                                                                                                                       |
| P97384 | ANX11_MOUSE Annexin A11 OS=Mus musculus GN=Anxa11 PE=1 SV=1                                | 2.1E-07 | 38.2  | 8.0  | 7 (3 4 0 0 0)     | Cytoplasm. Melanosome. Nucleus envelope. Nucleus ° nucleoplasm. Cytoplasm ° cytoskeleton ° spindle.                                      |
| P10107 | ANXA1_MOUSE Annexin A1 OS=Mus musculus GN=Anxa1 PE=1 SV=2                                  | 2.4E-11 | 40.3  | 15.6 | 9 (9 0 0 0 0)     | Nucleus. Cytoplasm. Cell projection ° cilium. Basolateral cell membrane.                                                                 |
| P07356 | ANXA2_MOUSE Annexin A2 OS=Mus musculus GN=Anxa2 PE=1 SV=2                                  | 2.8E-12 | 110.3 | 31.6 | 24 (24 0 0 0 0)   | Secreted ° extracellular space ° extracellular matrix ° basement membrane. Melanosome.                                                   |
| O35639 | ANXA3_MOUSE Annexin A3 OS=Mus musculus GN=Anxa3 PE=2 SV=3                                  | 8.8E-07 | 20.2  | 7.7  | 4 (4 0 0 0 0)     | ND                                                                                                                                       |
| P97429 | ANXA4_MOUSE Annexin A4 OS=Mus musculus GN=Anxa4 PE=2 SV=3                                  | 2.1E-09 | 40.2  | 16.0 | 6 (6 0 0 0 0)     | ND                                                                                                                                       |
| P48036 | ANXA5_MOUSE Annexin A5 OS=Mus musculus GN=Anxa5 PE=1 SV=1                                  | 3.6E-11 | 140.3 | 43.3 | 28 (28 0 0 0 0)   | ND                                                                                                                                       |
| P14824 | ANXA6_MOUSE Annexin A6 OS=Mus musculus GN=Anxa6 PE=1 SV=2                                  | 1.2E-12 | 408.3 | 53.5 | 102 (101 1 0 0 0) | Cytoplasm. Melanosome.                                                                                                                   |
| Q07076 | ANXA7_MOUSE Annexin A7 OS=Mus musculus GN=Anxa7 PE=2 SV=1                                  | 1.3E-07 | 20.2  | 6.5  | 4 (4 0 0 0 0)     | ND                                                                                                                                       |
| O35643 | AP1B1_MOUSE AP-1 complex subunit beta-1 OS=Mus musculus GN=Ap1b1 PE=1 SV=1                 | 1.1E-14 | 50.3  | 8.3  | 10 (10 0 0 0 0)   | Golgi apparatus. Cytoplasmic vesicle ° clathrin-coated vesicle membrane; Peripheral membrane protein; Cytoplasmic side. Golgi apparatus. |
| P17426 | AP2A1_MOUSE AP-2 complex subunit alpha-1 OS=Mus musculus GN=Ap2a1 PE=1 SV=1                | 2.3E-10 | 60.3  | 7.2  | 12 (12 0 0 0 0)   | Cell membrane. Membrane ° coated pit; Peripheral membrane protein; Cytoplasmic side.                                                     |

*A novel role of mitochondria in muscle injury*

|        |                                                                                                            |         |       |      |                      |                                                                                                                                                                 |
|--------|------------------------------------------------------------------------------------------------------------|---------|-------|------|----------------------|-----------------------------------------------------------------------------------------------------------------------------------------------------------------|
| P17427 | AP2A2_MOUSE AP-2 complex subunit alpha-2<br>OS=Mus musculus<br>GN=Ap2a2 PE=1 SV=1                          | 1.5E-08 | 30.2  | 5.1  | 4 (4 0 0 0 0)        | Cell membrane. Membrane $\hat{\epsilon}^{\circ}$ coated pit; Peripheral membrane protein; Cytoplasmic side.                                                     |
| P84091 | AP2M1_MOUSE AP-2 complex subunit mu<br>OS=Mus musculus<br>GN=Ap2m1 PE=1 SV=1                               | 2.6E-04 | 20.1  | 6.7  | 2 (2 0 0 0 0)        | Cell membrane. Membrane $\hat{\epsilon}^{\circ}$ coated pit; Peripheral membrane protein; Cytoplasmic side.                                                     |
| Q9Z1T1 | AP3B1_MOUSE AP-3 complex subunit beta-1<br>OS=Mus musculus<br>GN=Ap3b1 PE=1 SV=1                           | 5.8E-04 | 16.1  | 2.2  | 2 (1 0 1 0 0)        | Golgi apparatus. Cytoplasmic vesicle $\hat{\epsilon}^{\circ}$ clathrin-coated vesicle membrane; Peripheral membrane protein; Cytoplasmic side. Golgi apparatus. |
| P16460 | ASSY_MOUSE Argininosuccinate synthase<br>OS=Mus musculus GN=Ass1<br>PE=1 SV=1                              | 8.1E-11 | 30.2  | 7.5  | 17 (17 0 0 0 0)      | ND                                                                                                                                                              |
| Q9Z1W8 | AT12A_MOUSE Potassium-transporting ATPase alpha chain 2<br>OS=Mus musculus<br>GN=Atp12a PE=1 SV=2          | 7.1E-09 | 30.1  | 3.1  | 7 (7 0 0 0 0)        | Membrane; Multi-pass membrane protein.                                                                                                                          |
| Q8VDN2 | AT1A1_MOUSE Sodium/potassium-transporting ATPase subunit alpha-1<br>OS=Mus musculus<br>GN=Atp1a1 PE=1 SV=1 | 3.8E-14 | 110.3 | 12.2 | 58 (58 0 0 0 0)      | Cell membrane; Multi-pass membrane protein.                                                                                                                     |
| Q6PIE5 | AT1A2_MOUSE Sodium/potassium-transporting ATPase subunit alpha-2<br>OS=Mus musculus<br>GN=Atp1a2 PE=1 SV=1 | 8.4E-10 | 198.3 | 17.9 | 91 (90 1 0 0 0)      | Membrane; Multi-pass membrane protein. Cell membrane; Multi-pass membrane protein.                                                                              |
| P14094 | AT1B1_MOUSE Sodium/potassium-transporting ATPase subunit beta-1<br>OS=Mus musculus<br>GN=Atp1b1 PE=1 SV=1  | 5.2E-07 | 20.2  | 7.2  | 8 (8 0 0 0 0)        | Membrane; Single-pass type II membrane protein.                                                                                                                 |
| Q8R429 | AT2A1_MOUSE Sarcoplasmic/endoplasmic reticulum calcium ATPase 1<br>OS=Mus musculus<br>GN=Atp2a1 PE=2 SV=1  | 1.0E-30 | 814.4 | 40.6 | 5708 (5614 94 0 0 0) | Endoplasmic reticulum membrane; Multi-pass membrane protein. Sarcoplasmic reticulum membrane; Multi-pass membrane protein.                                      |

|        |                                                                                                                 |         |       |      |                       |                                                                                                                                                         |
|--------|-----------------------------------------------------------------------------------------------------------------|---------|-------|------|-----------------------|---------------------------------------------------------------------------------------------------------------------------------------------------------|
| O55143 | AT2A2_MOUSE<br>Sarcoplasmic/endoplasmic<br>reticulum calcium ATPase 2<br>OS=Mus musculus<br>GN=Atp2a2 PE=1 SV=2 | 6.7E-15 | 138.3 | 11.1 | 55 (53 2 0<br>0 0)    | Endoplasmic<br>reticulum<br>membrane; Multi-<br>pass membrane<br>protein.<br>Sarcoplasmic<br>reticulum<br>membrane; Multi-<br>pass membrane<br>protein. |
| Q9CQQ7 | AT5F1_MOUSE ATP<br>synthase subunit b,<br>mitochondrial OS=Mus<br>musculus GN=Atp5f1 PE=1<br>SV=1               | 1.0E-08 | 60.2  | 20.3 | 8 (8 0 0 0<br>0)      | Mitochondrion.<br>Mitochondrion<br>inner membrane.                                                                                                      |
| Q6PA06 | ATLA2_MOUSE Atlastin-2<br>OS=Mus musculus GN=Atl2<br>PE=1 SV=1                                                  | 1.2E-09 | 40.2  | 9.3  | 5 (5 0 0 0<br>0)      | Endoplasmic<br>reticulum<br>membrane; Multi-<br>pass membrane<br>protein.                                                                               |
| Q9DCX2 | ATP5H_MOUSE ATP<br>synthase subunit d,<br>mitochondrial OS=Mus<br>musculus GN=Atp5h PE=1<br>SV=3                | 1.1E-09 | 40.2  | 15.5 | 6 (6 0 0 0<br>0)      | Mitochondrion.<br>Mitochondrion<br>inner membrane.                                                                                                      |
| Q06185 | ATP5I_MOUSE ATP<br>synthase subunit e,<br>mitochondrial OS=Mus<br>musculus GN=Atp5i PE=1<br>SV=2                | 2.3E-04 | 20.2  | 21.1 | 3 (3 0 0 0<br>0)      | Mitochondrion.<br>Mitochondrion<br>inner membrane.                                                                                                      |
| Q03265 | ATPA_MOUSE ATP<br>synthase subunit alpha,<br>mitochondrial OS=Mus<br>musculus GN=Atp5a1 PE=1<br>SV=1            | 1.1E-15 | 420.4 | 61.5 | 306 (304 2<br>0 0 0)  | Mitochondrion<br>inner membrane.<br>Cell membrane;<br>Peripheral<br>membrane protein;<br>Extracellular side.                                            |
| P56480 | ATPB_MOUSE ATP<br>synthase subunit beta,<br>mitochondrial OS=Mus<br>musculus GN=Atp5b PE=1<br>SV=2              | 1.0E-30 | 450.3 | 75.2 | 325 (313<br>12 0 0 0) | Mitochondrion.<br>Mitochondrion<br>inner membrane.                                                                                                      |
| Q9D3D9 | ATPD_MOUSE ATP<br>synthase subunit delta,<br>mitochondrial OS=Mus<br>musculus GN=Atp5d PE=1<br>SV=1             | 1.6E-08 | 20.2  | 13.7 | 2 (2 0 0 0<br>0)      | Mitochondrion.<br>Mitochondrion<br>inner membrane.                                                                                                      |
| Q91VR2 | ATPG_MOUSE ATP<br>synthase subunit gamma,<br>mitochondrial OS=Mus<br>musculus GN=Atp5c1 PE=1<br>SV=1            | 2.8E-09 | 70.3  | 24.5 | 15 (15 0 0<br>0 0)    | Mitochondrion.<br>Mitochondrion<br>inner membrane;<br>Peripheral<br>membrane protein.                                                                   |
| P56135 | ATPK_MOUSE ATP<br>synthase subunit f,<br>mitochondrial OS=Mus<br>musculus GN=Atp5j2 PE=1                        | 9.0E-04 | 20.1  | 26.1 | 2 (2 0 0 0<br>0)      | Mitochondrion.<br>Mitochondrion<br>inner membrane.                                                                                                      |

*A novel role of mitochondria in muscle injury*

|        |                                                                                                             |         |       |      |                   |                                                                                                                                                          |
|--------|-------------------------------------------------------------------------------------------------------------|---------|-------|------|-------------------|----------------------------------------------------------------------------------------------------------------------------------------------------------|
|        | SV=3                                                                                                        |         |       |      |                   |                                                                                                                                                          |
| Q9DB20 | ATPO_MOUSE ATP synthase subunit O, mitochondrial OS=Mus musculus GN=Atp5o PE=1 SV=1                         | 6.1E-09 | 78.2  | 26.3 | 12 (11 1 0 0 0)   | Mitochondrion. Mitochondrion inner membrane.                                                                                                             |
| Q61335 | BAP31_MOUSE B-cell receptor-associated protein 31 OS=Mus musculus GN=Bcap31 PE=1 SV=3                       | 4.5E-05 | 20.1  |      | 2 (2 0 0 0 0)     | Endoplasmic reticulum membrane; Multi-pass membrane protein. Endoplasmic reticulum-Golgi intermediate compartment membrane; Multi-pass membrane protein. |
| P18572 | BASI_MOUSE Basigin OS=Mus musculus GN=Bsg PE=1 SV=2                                                         | 3.5E-07 | 30.2  | 9.8  | 6 (6 0 0 0 0)     | Cell membrane; Single-pass type I membrane protein. Melanosome.                                                                                          |
| Q80XN0 | BDH_MOUSE D-beta-hydroxybutyrate dehydrogenase, mitochondrial OS=Mus musculus GN=Bdh1 PE=1 SV=1             | 1.3E-14 | 30.3  | 8.7  | 4 (4 0 0 0 0)     | Mitochondrion matrix.                                                                                                                                    |
| P82198 | BGH3_MOUSE Transforming growth factor-beta-induced protein ig-h3 OS=Mus musculus GN=Tgfb1 PE=2 SV=1         | 2.7E-08 | 20.2  | 5.0  | 3 (3 0 0 0 0)     | Secreted $\text{â€}^{\circ}$ extracellular space $\text{â€}^{\circ}$ extracellular matrix.                                                               |
| O35490 | BHMT1_MOUSE Betaine--homocysteine S-methyltransferase 1 OS=Mus musculus GN=Bhmt PE=2 SV=1                   | 1.2E-14 | 20.3  | 4.9  | 200 (200 0 0 0 0) | Cytoplasm.                                                                                                                                               |
| O08539 | BIN1_MOUSE Myc box-dependent-interacting protein 1 OS=Mus musculus GN=Bin1 PE=1 SV=1                        | 4.5E-12 | 88.3  | 22.1 | 22 (21 1 0 0 0)   | Cytoplasm. Nucleus.                                                                                                                                      |
| O08532 | CA2D1_MOUSE Voltage-dependent calcium channel subunit alpha-2/delta-1 OS=Mus musculus GN=Cacna2d1 PE=1 SV=1 | 1.3E-14 | 238.3 | 25.8 | 46 (45 1 0 0 0)   | Membrane; Single-pass type I membrane protein.                                                                                                           |
| Q02789 | CAC1S_MOUSE Voltage-dependent L-type calcium channel subunit alpha-1S OS=Mus musculus GN=Cacna1s PE=1 SV=2  | 2.9E-10 | 40.2  | 2.2  | 8 (8 0 0 0 0)     | Membrane; Multi-pass membrane protein.                                                                                                                   |
| P47934 | CACP_MOUSE Carnitine O-acetyltransferase OS=Mus musculus GN=Crat PE=1                                       | 2.9E-12 | 50.2  | 10.1 | 5 (5 0 0 0 0)     | Endoplasmic reticulum. Peroxisome.                                                                                                                       |

|        |                                                                                                                           |         |       |      |                 |                                                                                  |
|--------|---------------------------------------------------------------------------------------------------------------------------|---------|-------|------|-----------------|----------------------------------------------------------------------------------|
|        | SV=2                                                                                                                      |         |       |      |                 | Mitochondrion inner membrane; Peripheral membrane protein; Matrix side.          |
| Q9WTR5 | CAD13_MOUSE Cadherin-13 OS=Mus musculus GN=Cdh13 PE=2 SV=1                                                                | 7.4E-10 | 20.2  | 4.9  | 9 (9 0 0 0 0)   | Cell membrane; Lipid-anchor &#x2190 GPI-anchor.                                  |
| P16015 | CAH3_MOUSE Carbonic anhydrase 3 OS=Mus musculus GN=Ca3 PE=1 SV=3                                                          | 1.3E-12 | 50.2  | 29.2 | 9 (9 0 0 0 0)   | Cytoplasm.                                                                       |
| P35564 | CALX_MOUSE Calnexin OS=Mus musculus GN=Canx PE=1 SV=1                                                                     | 5.2E-12 | 50.2  | 9.3  | 12 (12 0 0 0 0) | Endoplasmic reticulum membrane; Single-pass type I membrane protein. Melanosome. |
| O35350 | CAN1_MOUSE Calpain-1 catalytic subunit OS=Mus musculus GN=Capn1 PE=2 SV=1                                                 | 3.0E-07 | 30.2  | 4.3  | 3 (3 0 0 0 0)   | Cytoplasm. Cell membrane.                                                        |
| Q6ZQ73 | CAND2_MOUSE Cullin-associated NEDD8-dissociated protein 2 OS=Mus musculus GN=Cand2 PE=1 SV=2                              | 9.1E-13 | 50.3  | 6.3  | 8 (8 0 0 0 0)   | Nucleus.                                                                         |
| O09165 | CASQ1_MOUSE Calsequestrin-1 OS=Mus musculus GN=Casq1 PE=2 SV=2                                                            | 1.0E-30 | 60.3  | 18.3 | 12 (12 0 0 0 0) | Sarcoplasmic reticulum lumen.                                                    |
| P24270 | CATA_MOUSE Catalase OS=Mus musculus GN=Cat PE=1 SV=3                                                                      | 3.7E-09 | 50.2  | 14.2 | 5 (5 0 0 0 0)   | Peroxisome.                                                                      |
| Q9D024 | CC47_MOUSE Coiled-coil domain-containing protein 47 OS=Mus musculus GN=Ccdc47 PE=2 SV=2                                   | 6.3E-05 | 30.2  | 3.9  | 3 (3 0 0 0 0)   | Membrane; Single-pass membrane protein.                                          |
| Q08857 | CD36_MOUSE Platelet glycoprotein 4 OS=Mus musculus GN=Cd36 PE=2 SV=2                                                      | 8.2E-13 | 40.3  | 10.4 | 9 (9 0 0 0 0)   | Membrane; Multi-pass membrane protein.                                           |
| P63038 | CH60_MOUSE 60 kDa heat shock protein, mitochondrial OS=Mus musculus GN=Hspd1 PE=1 SV=1                                    | 2.2E-15 | 160.3 | 27.4 | 28 (28 0 0 0 0) | Mitochondrion matrix.                                                            |
| O55226 | CHAD_MOUSE Chondroadherin OS=Mus musculus GN=Chad PE=2 SV=1                                                               | 1.0E-11 | 30.2  | 10.3 | 4 (4 0 0 0 0)   | Secreted &#x2190 extracellular space &#x2190 extracellular matrix.               |
| Q9CRB9 | CHCH3_MOUSE Coiled-coil-helix-coiled-coil-helix domain-containing protein 3, mitochondrial OS=Mus musculus GN=Chchd3 PE=1 | 2.0E-08 | 50.2  | 9.3  | 6 (6 0 0 0 0)   | Mitochondrion inner membrane; Lipid-anchor; Intermembrane side.                  |

*A novel role of mitochondria in muscle injury*

|        |                                                                                                        |         |       |      |                   |                                                                                                                                                                                       |
|--------|--------------------------------------------------------------------------------------------------------|---------|-------|------|-------------------|---------------------------------------------------------------------------------------------------------------------------------------------------------------------------------------|
|        | SV=1                                                                                                   |         |       |      |                   |                                                                                                                                                                                       |
| Q9CZU6 | CISY_MOUSE Citrate synthase, mitochondrial OS=Mus musculus GN=Cs PE=1 SV=1                             | 2.2E-15 | 218.3 | 39.4 | 44 (38 4 2 0 0)   | Mitochondrion matrix.                                                                                                                                                                 |
| Q68FD5 | CLH_MOUSE Clathrin heavy chain 1 OS=Mus musculus GN=Cltc PE=1 SV=3                                     | 1.0E-30 | 424.3 | 31.7 | 107 (103 2 2 0 0) | Cytoplasmic vesicle membrane; Peripheral membrane protein; Cytoplasmic side. Membrane $\hat{\epsilon}^{\circ}$ coated pit; Peripheral membrane protein; Cytoplasmic side. Melanosome. |
| Q8BH59 | CMC1_MOUSE Calcium-binding mitochondrial carrier protein Aralar1 OS=Mus musculus GN=Slc25a12 PE=1 SV=1 | 1.0E-30 | 298.4 | 49.2 | 76 (73 3 0 0 0)   | Mitochondrion inner membrane; Multi-pass membrane protein.                                                                                                                            |
| P11087 | CO1A1_MOUSE Collagen alpha-1(I) chain OS=Mus musculus GN=Col1a1 PE=1 SV=4                              | 2.6E-14 | 30.2  | 2.1  | 19 (19 0 0 0 0)   | Secreted $\hat{\epsilon}^{\circ}$ extracellular space $\hat{\epsilon}^{\circ}$ extracellular matrix.                                                                                  |
| Q01149 | CO1A2_MOUSE Collagen alpha-2(I) chain OS=Mus musculus GN=Col1a2 PE=2 SV=2                              | 1.6E-14 | 40.2  | 4.2  | 23 (23 0 0 0 0)   | Secreted $\hat{\epsilon}^{\circ}$ extracellular space $\hat{\epsilon}^{\circ}$ extracellular matrix.                                                                                  |
| P01027 | CO3_MOUSE Complement C3 OS=Mus musculus GN=C3 PE=1 SV=2                                                | 2.0E-08 | 30.2  | 2.0  | 5 (5 0 0 0 0)     | Secreted.                                                                                                                                                                             |
| Q04857 | CO6A1_MOUSE Collagen alpha-1(VI) chain OS=Mus musculus GN=Col6a1 PE=2 SV=1                             | 8.9E-15 | 140.3 | 15.9 | 71 (71 0 0 0 0)   | Secreted $\hat{\epsilon}^{\circ}$ extracellular space $\hat{\epsilon}^{\circ}$ extracellular matrix.                                                                                  |
| Q02788 | CO6A2_MOUSE Collagen alpha-2(VI) chain OS=Mus musculus GN=Col6a2 PE=2 SV=3                             | 1.0E-30 | 190.3 | 18.2 | 63 (63 0 0 0 0)   | Secreted $\hat{\epsilon}^{\circ}$ extracellular space $\hat{\epsilon}^{\circ}$ extracellular matrix. Membrane; Peripheral membrane protein.                                           |
| Q8C6K9 | CO6A6_MOUSE Collagen alpha-6(VI) chain OS=Mus musculus GN=Col6a6 PE=1 SV=2                             | 9.2E-07 | 20.2  | 1.0  | 2 (2 0 0 0 0)     | Secreted $\hat{\epsilon}^{\circ}$ extracellular space $\hat{\epsilon}^{\circ}$ extracellular matrix.                                                                                  |
| Q60847 | COCA1_MOUSE Collagen alpha-1(XII) chain OS=Mus musculus GN=Col12a1 PE=2 SV=3                           | 2.2E-15 | 110.3 | 6.2  | 17 (17 0 0 0 0)   | Secreted $\hat{\epsilon}^{\circ}$ extracellular space $\hat{\epsilon}^{\circ}$ extracellular matrix.                                                                                  |
| P00405 | COX2_MOUSE Cytochrome c oxidase subunit 2 OS=Mus musculus GN=Mtco2 PE=1 SV=1                           | 4.7E-10 | 28.3  | 7.0  | 7 (6 1 0 0 0)     | Mitochondrion inner membrane; Multi-pass membrane protein.                                                                                                                            |

*A novel role of mitochondria in muscle injury*

|        |                                                                                                            |         |       |      |                   |                                                                                                     |
|--------|------------------------------------------------------------------------------------------------------------|---------|-------|------|-------------------|-----------------------------------------------------------------------------------------------------|
| P19783 | COX41_MOUSE<br>Cytochrome c oxidase subunit 4 isoform 1, mitochondrial OS=Mus musculus GN=Cox4i1 PE=1 SV=2 | 3.8E-11 | 40.2  | 23.7 | 10 (10 0 0 0)     | Mitochondrion inner membrane.                                                                       |
| P12787 | COX5A_MOUSE<br>Cytochrome c oxidase subunit 5A, mitochondrial OS=Mus musculus GN=Cox5a PE=1 SV=2           | 1.7E-05 | 20.2  | 6.8  | 9 (9 0 0 0 0)     | Mitochondrion inner membrane.                                                                       |
| Q9CPQ1 | COX6C_MOUSE<br>Cytochrome c oxidase subunit 6C OS=Mus musculus GN=Cox6c PE=1 SV=3                          | 6.2E-04 | 20.1  | 27.6 | 2 (2 0 0 0 0)     | Mitochondrion inner membrane.                                                                       |
| Q8C196 | CPSM_MOUSE Carbamoyl-phosphate synthase [ammonia], mitochondrial OS=Mus musculus GN=Cps1 PE=1 SV=2         | 1.0E-30 | 50.4  | 4.3  | 377 (377 0 0 0 0) | Mitochondrion.                                                                                      |
| Q924X2 | CPT1B_MOUSE Carnitine O-palmitoyltransferase 1, muscle isoform OS=Mus musculus GN=Cpt1b PE=2 SV=1          | 4.6E-13 | 130.2 | 16.2 | 27 (27 0 0 0 0)   | Mitochondrion outer membrane; Multi-pass membrane protein.                                          |
| P52825 | CPT2_MOUSE Carnitine O-palmitoyltransferase 2, mitochondrial OS=Mus musculus GN=Cpt2 PE=1 SV=1             | 1.7E-12 | 80.3  | 13.4 | 11 (11 0 0 0 0)   | Mitochondrion inner membrane; Peripheral membrane protein; Matrix side.                             |
| Q9D5V5 | CUL5_MOUSE Cullin-5 OS=Mus musculus GN=Cul5 PE=2 SV=3                                                      | 8.1E-09 | 30.2  | 4.6  | 3 (3 0 0 0 0)     | ND                                                                                                  |
| Q9D0M3 | CY1_MOUSE Cytochrome c1, heme protein, mitochondrial OS=Mus musculus GN=Cyc1 PE=1 SV=1                     | 1.1E-15 | 86.3  | 28.9 | 13 (9 2 1 1 0)    | Mitochondrion inner membrane; Single-pass membrane protein; Intermembrane side.                     |
| P42125 | D3D2_MOUSE 3,2-trans-enoyl-CoA isomerase, mitochondrial OS=Mus musculus GN=Dci PE=2 SV=1                   | 9.5E-09 | 60.2  | 21.5 | 7 (7 0 0 0 0)     | Mitochondrion matrix.                                                                               |
| Q99KJ8 | DCTN2_MOUSE Dynactin subunit 2 OS=Mus musculus GN=Dctn2 PE=1 SV=3                                          | 1.1E-05 | 20.2  | 7.2  | 2 (2 0 0 0 0)     | Cytoplasm <sup>o</sup> cytoskeleton <sup>o</sup> centrosome. Membrane; Peripheral membrane protein. |
| Q9CQ62 | DECR_MOUSE 2,4-dienoyl-CoA reductase, mitochondrial OS=Mus musculus GN=Decr1 PE=1                          | 1.1E-15 | 40.3  | 15.8 | 9 (9 0 0 0 0)     | Mitochondrion.                                                                                      |

*A novel role of mitochondria in muscle injury*

|        |                                                                                                                                      |         |       |      |                    |                                                                                                                            |
|--------|--------------------------------------------------------------------------------------------------------------------------------------|---------|-------|------|--------------------|----------------------------------------------------------------------------------------------------------------------------|
|        | SV=1                                                                                                                                 |         |       |      |                    |                                                                                                                            |
| P31001 | DESM_MOUSE Desmin<br>OS=Mus musculus GN=Des<br>PE=1 SV=3                                                                             | 1.5E-11 | 190.3 | 32.8 | 47 (47 0 0<br>0 0) | Cytoplasm.                                                                                                                 |
| Q99LB2 | DHRS4_MOUSE<br>Dehydrogenase/reductase<br>SDR family member 4<br>OS=Mus musculus<br>GN=Dhrs4 PE=2 SV=1                               | 1.2E-11 | 50.2  | 18.8 | 7 (7 0 0 0<br>0)   | Peroxisome.                                                                                                                |
| Q8K2B3 | DHSA_MOUSE Succinate<br>dehydrogenase [ubiquinone]<br>flavoprotein subunit,<br>mitochondrial OS=Mus<br>musculus GN=Sdha PE=1<br>SV=1 | 9.0E-14 | 90.3  | 17.0 | 19 (19 0 0<br>0 0) | Mitochondrion<br>inner membrane;<br>Peripheral<br>membrane protein;<br>Matrix side.                                        |
| Q9CQA3 | DHSB_MOUSE Succinate<br>dehydrogenase [ubiquinone]<br>iron-sulfur subunit,<br>mitochondrial OS=Mus<br>musculus GN=Sdhb PE=1<br>SV=1  | 1.8E-08 | 50.2  | 18.8 | 5 (5 0 0 0<br>0)   | Mitochondrion<br>inner membrane;<br>Peripheral<br>membrane protein;<br>Matrix side.                                        |
| O08749 | DLDH_MOUSE<br>Dihydrolipoyl<br>dehydrogenase,<br>mitochondrial OS=Mus<br>musculus GN=Dld PE=1<br>SV=2                                | 1.1E-14 | 90.3  | 18.9 | 13 (13 0 0<br>0 0) | Mitochondrion<br>matrix.                                                                                                   |
| P11531 | DMD_MOUSE Dystrophin<br>OS=Mus musculus GN=Dmd<br>PE=1 SV=2                                                                          | 1.0E-11 | 20.2  | 1.0  | 4 (4 0 0 0<br>0)   | Cell membrane â€°<br>sarcolemma;<br>Peripheral<br>membrane protein;<br>Cytoplasmic side.<br>Cytoplasm â€°<br>cytoskeleton. |
| Q8K1M6 | DNM1L_MOUSE Dynamin-<br>1-like protein OS=Mus<br>musculus GN=Dnm1l PE=1<br>SV=2                                                      | 4.8E-14 | 30.3  | 7.1  | 4 (4 0 0 0<br>0)   | Cytoplasm â€°<br>cytosol. Golgi<br>apparatus.<br>Endomembrane<br>system; Peripheral<br>membrane protein.                   |
| Q9Z2W0 | DNPEP_MOUSE Aspartyl<br>aminopeptidase OS=Mus<br>musculus GN=Dnpep PE=2<br>SV=1                                                      | 5.1E-05 | 20.2  | 8.2  | 2 (2 0 0 0<br>0)   | Cytoplasm.                                                                                                                 |
| O08553 | DPYL2_MOUSE<br>Dihydropyrimidinase-related<br>protein 2 OS=Mus musculus<br>GN=Dpysl2 PE=1 SV=2                                       | 6.3E-09 | 40.2  | 7.7  | 5 (5 0 0 0<br>0)   | Cytoplasm.                                                                                                                 |
| Q8CHS7 | DRS7C_MOUSE<br>Dehydrogenase/reductase<br>SDR family member 7C<br>OS=Mus musculus<br>GN=Dhrs7c PE=2 SV=3                             | 8.9E-10 | 60.3  | 19.3 | 6 (6 0 0 0<br>0)   | Secreted.                                                                                                                  |
| Q9JHU4 | DYHC1_MOUSE<br>Cytoplasmic dynein 1 heavy                                                                                            | 6.7E-15 | 260.4 | 7.5  | 38 (38 0 0<br>0 0) | Cytoplasm â€°<br>cytoskeleton.                                                                                             |



*A novel role of mitochondria in muscle injury*

|        |                                                                                                                      |         |       |      |                      |                                                                                                                                                                                                                                             |
|--------|----------------------------------------------------------------------------------------------------------------------|---------|-------|------|----------------------|---------------------------------------------------------------------------------------------------------------------------------------------------------------------------------------------------------------------------------------------|
|        | chain 1 OS=Mus musculus<br>GN=Dync1h1 PE=1 SV=1                                                                      |         |       |      |                      |                                                                                                                                                                                                                                             |
| Q9ESD7 | DYSF_MOUSE Dysferlin<br>OS=Mus musculus GN=Dysf<br>PE=1 SV=3                                                         | 2.8E-09 | 20.3  | 1.5  | 2 (2 0 0 0<br>0)     | Cell membrane â€°<br>sarcolemma;<br>Single-pass type II<br>membrane protein.<br>Cytoplasmic<br>vesicle membrane;<br>Single-pass type II<br>membrane protein.                                                                                |
| O35459 | ECH1_MOUSE Delta(3,5)-<br>Delta(2,4)-dienoyl-CoA<br>isomerase, mitochondrial<br>OS=Mus musculus GN=Ech1<br>PE=2 SV=1 | 2.0E-10 | 30.2  | 8.9  | 3 (3 0 0 0<br>0)     | Mitochondrion.<br>Peroxisome.                                                                                                                                                                                                               |
| Q8BMS1 | ECHA_MOUSE<br>Trifunctional enzyme subunit<br>alpha, mitochondrial<br>OS=Mus musculus<br>GN=Hadha PE=1 SV=1          | 1.0E-30 | 344.4 | 43.6 | 107 (104 3<br>0 0 0) | Mitochondrion<br>matrix.                                                                                                                                                                                                                    |
| Q99JY0 | ECHB_MOUSE<br>Trifunctional enzyme subunit<br>beta, mitochondrial OS=Mus<br>musculus GN=Hadhb PE=1<br>SV=1           | 1.9E-13 | 220.3 | 44.4 | 33 (33 0 0<br>0 0)   | Mitochondrion<br>matrix.                                                                                                                                                                                                                    |
| Q8BH95 | ECHM_MOUSE Enoyl-CoA<br>hydratase, mitochondrial<br>OS=Mus musculus<br>GN=Echs1 PE=1 SV=1                            | 1.0E-30 | 50.3  | 15.9 | 8 (6 2 0 0<br>0)     | Mitochondrion<br>matrix.                                                                                                                                                                                                                    |
| Q6PDI5 | ECM29_MOUSE<br>Proteasome-associated<br>protein ECM29 homolog<br>OS=Mus musculus<br>GN=Ecm29 PE=1 SV=2               | 9.4E-07 | 20.2  | 1.5  | 3 (3 0 0 0<br>0)     | Endoplasmic<br>reticulum.<br>Endoplasmic<br>reticulum-Golgi<br>intermediate<br>compartment.<br>Endosome.<br>Cytoplasm â€°<br>cytoskeleton â€°<br>centrosome.<br>Nucleus.<br>Endosome â€°<br>multivesicular<br>body. Cytoplasmic<br>vesicle. |
| P10126 | EF1A1_MOUSE Elongation<br>factor 1-alpha 1 OS=Mus<br>musculus GN=Eef1a1 PE=1<br>SV=3                                 | 2.5E-11 | 100.2 | 21.9 | 95 (95 0 0<br>0 0)   | Cytoplasm.                                                                                                                                                                                                                                  |
| P62631 | EF1A2_MOUSE Elongation<br>factor 1-alpha 2 OS=Mus<br>musculus GN=Eef1a2 PE=1<br>SV=1                                 | 8.2E-13 | 140.3 | 27.9 | 102 (101 1<br>0 0 0) | Nucleus.                                                                                                                                                                                                                                    |
| P57776 | EF1D_MOUSE Elongation<br>factor 1-delta OS=Mus<br>musculus GN=Eef1d PE=1                                             | 5.1E-08 | 40.2  | 21.7 | 8 (8 0 0 0<br>0)     | ND                                                                                                                                                                                                                                          |

|        |                                                                                  |         |       |      |                 |                                                                                                                                                                               |
|--------|----------------------------------------------------------------------------------|---------|-------|------|-----------------|-------------------------------------------------------------------------------------------------------------------------------------------------------------------------------|
|        | SV=3                                                                             |         |       |      |                 |                                                                                                                                                                               |
| Q9D8N0 | EF1G_MOUSE Elongation factor 1-gamma OS=Mus musculus GN=Eef1g PE=1 SV=3          | 2.4E-11 | 60.2  | 18.1 | 13 (13 0 0 0)   | ND                                                                                                                                                                            |
| P58252 | EF2_MOUSE Elongation factor 2 OS=Mus musculus GN=Eef2 PE=1 SV=2                  | 5.7E-12 | 120.3 | 17.4 | 29 (29 0 0 0)   | Cytoplasm.                                                                                                                                                                    |
| Q8BFR5 | EFTU_MOUSE Elongation factor Tu, mitochondrial OS=Mus musculus GN=Tufm PE=1 SV=1 | 3.2E-12 | 60.2  | 15.7 | 12 (12 0 0 0)   | Mitochondrion.                                                                                                                                                                |
| Q9WVK4 | EHD1_MOUSE EH domain-containing protein 1 OS=Mus musculus GN=Ehd1 PE=1 SV=1      | 4.5E-10 | 20.2  | 6.2  | 2 (2 0 0 0 0)   | Cell membrane; Peripheral membrane protein; Cytoplasmic side. Early endosome membrane; Peripheral membrane protein. Recycling endosome membrane; Peripheral membrane protein. |
| Q8BH64 | EHD2_MOUSE EH domain-containing protein 2 OS=Mus musculus GN=Ehd2 PE=1 SV=1      | 1.1E-14 | 220.3 | 37.2 | 35 (35 0 0 0 0) | Cell membrane; Peripheral membrane protein; Cytoplasmic side. Endosome membrane; Peripheral membrane protein.                                                                 |
| Q9EQP2 | EHD4_MOUSE EH domain-containing protein 4 OS=Mus musculus GN=Ehd4 PE=1 SV=1      | 6.6E-08 | 20.2  | 3.5  | 2 (2 0 0 0 0)   | Early endosome membrane; Peripheral membrane protein. Recycling endosome membrane; Peripheral membrane protein.                                                               |
| P17182 | ENOA_MOUSE Alpha-enolase OS=Mus musculus GN=Eno1 PE=1 SV=3                       | 7.3E-14 | 60.3  | 19.6 | 9 (9 0 0 0 0)   | Cytoplasm. Cell membrane.                                                                                                                                                     |
| P21550 | ENOB_MOUSE Beta-enolase OS=Mus musculus GN=Eno3 PE=1 SV=3                        | 2.0E-14 | 166.3 | 29.5 | 33 (27 6 0 0 0) | Cytoplasm.                                                                                                                                                                    |
| P08113 | ENPL_MOUSE Endoplasmin OS=Mus musculus GN=Hsp90b1 PE=1 SV=2                      | 1.8E-11 | 20.3  | 3.9  | 7 (7 0 0 0 0)   | Endoplasmic reticulum lumen. Melanosome.                                                                                                                                      |
| O55026 | ENTP2_MOUSE Ectonucleoside triphosphate diphosphohydrolase 2                     | 2.3E-06 | 20.2  | 4.8  | 3 (3 0 0 0 0)   | Membrane; Multi-pass membrane protein.                                                                                                                                        |

*A novel role of mitochondria in muscle injury*

|            |                                                                                                                                       |         |      |      |                    |                                                                                                                                                                                                                                                                                                                                                                                    |
|------------|---------------------------------------------------------------------------------------------------------------------------------------|---------|------|------|--------------------|------------------------------------------------------------------------------------------------------------------------------------------------------------------------------------------------------------------------------------------------------------------------------------------------------------------------------------------------------------------------------------|
|            | OS=Mus musculus<br>GN=Entpd2 PE=1 SV=2                                                                                                |         |      |      |                    |                                                                                                                                                                                                                                                                                                                                                                                    |
| Q9R0P3     | ESTD_MOUSE S-<br>formylglutathione hydrolase<br>OS=Mus musculus GN=Esd<br>PE=2 SV=1                                                   | 3.0E-12 | 20.2 | 8.2  | 4 (4 0 0 0<br>0)   | Cytoplasm.<br>Cytoplasmic<br>vesicle.                                                                                                                                                                                                                                                                                                                                              |
| Q99LC5     | ETFA_MOUSE Electron<br>transfer flavoprotein subunit<br>alpha, mitochondrial<br>OS=Mus musculus GN=Etfa<br>PE=1 SV=2                  | 1.1E-10 | 50.2 | 19.8 | 6 (6 0 0 0<br>0)   | Mitochondrion<br>matrix.                                                                                                                                                                                                                                                                                                                                                           |
| Q9DCW<br>4 | ETFB_MOUSE Electron<br>transfer flavoprotein subunit<br>beta OS=Mus musculus<br>GN=Etfb PE=1 SV=3                                     | 6.9E-07 | 50.2 | 25.1 | 5 (5 0 0 0<br>0)   | Mitochondrion<br>matrix.                                                                                                                                                                                                                                                                                                                                                           |
| Q921G7     | ETFD_MOUSE Electron<br>transfer flavoprotein-<br>ubiquinone oxidoreductase,<br>mitochondrial OS=Mus<br>musculus GN=Etfdh PE=1<br>SV=1 | 6.9E-10 | 70.2 | 13.1 | 15 (15 0 0<br>0 0) | Mitochondrion<br>inner membrane.                                                                                                                                                                                                                                                                                                                                                   |
| P26040     | EZRI_MOUSE Ezrin<br>OS=Mus musculus GN=Ezr<br>PE=1 SV=3                                                                               | 2.2E-08 | 40.2 | 5.3  | 11 (11 0 0<br>0 0) | Apical cell<br>membrane;<br>Peripheral<br>membrane protein;<br>Cytoplasmic side.<br>Cell projection.<br>Cell projection â€°<br>microvillus<br>membrane;<br>Peripheral<br>membrane protein;<br>Cytoplasmic side.<br>Cell projection â€°<br>ruffle membrane;<br>Peripheral<br>membrane protein;<br>Cytoplasmic side.<br>Cytoplasm â€° cell<br>cortex. Cytoplasm<br>â€° cytoskeleton. |
| P19096     | FAS_MOUSE Fatty acid<br>synthase OS=Mus musculus<br>GN=Fasn PE=1 SV=2                                                                 | 1.1E-15 | 20.2 | 1.4  | 5 (5 0 0 0<br>0)   | Cytoplasm.<br>Melanosome.                                                                                                                                                                                                                                                                                                                                                          |
| Q61554     | FBN1_MOUSE Fibrillin-1<br>OS=Mus musculus GN=Fbn1<br>PE=1 SV=1                                                                        | 9.7E-06 | 20.2 | 0.6  | 7 (7 0 0 0<br>0)   | Secreted â€°<br>extracellular space<br>â€° extracellular<br>matrix.                                                                                                                                                                                                                                                                                                                |
| P97447     | FHL1_MOUSE Four and a<br>half LIM domains protein 1<br>OS=Mus musculus GN=Fhl1<br>PE=2 SV=3                                           | 4.1E-06 | 30.2 | 8.2  | 6 (6 0 0 0<br>0)   | Cytoplasm.<br>Nucleus.                                                                                                                                                                                                                                                                                                                                                             |
| Q8BTM8     | FLNA_MOUSE Filamin-A<br>OS=Mus musculus GN=Flna<br>PE=1 SV=4                                                                          | 5.7E-12 | 50.2 | 1.6  | 9 (9 0 0 0<br>0)   | Cytoplasm â€° cell<br>cortex. Cytoplasm<br>â€° cytoskeleton.                                                                                                                                                                                                                                                                                                                       |

*A novel role of mitochondria in muscle injury*

|        |                                                                                                                            |         |       |      |                      |                                                                                                                                                                                                                                                |
|--------|----------------------------------------------------------------------------------------------------------------------------|---------|-------|------|----------------------|------------------------------------------------------------------------------------------------------------------------------------------------------------------------------------------------------------------------------------------------|
| Q8VHX6 | FLNC_MOUSE Filamin-C<br>OS=Mus musculus GN=Flnc<br>PE=1 SV=3                                                               | 1.1E-15 | 540.3 | 26.9 | 190 (190 0<br>0 0 0) | Cytoplasm.<br>Membrane;<br>Peripheral<br>membrane protein.<br>Cytoplasm $\hat{\epsilon}^{\circ}$<br>cytoskeleton.<br>Cytoplasm $\hat{\epsilon}^{\circ}$<br>myofibril $\hat{\epsilon}^{\circ}$<br>sarcomere $\hat{\epsilon}^{\circ}$ Z<br>line. |
| P50608 | FMOD_MOUSE<br>Fibromodulin OS=Mus<br>musculus GN=Fmod PE=2<br>SV=1                                                         | 1.0E-12 | 40.3  | 11.7 | 16 (16 0 0<br>0 0)   | Secreted $\hat{\epsilon}^{\circ}$<br>extracellular space<br>$\hat{\epsilon}^{\circ}$ extracellular<br>matrix.                                                                                                                                  |
| P97807 | FUMH_MOUSE Fumarate<br>hydratase, mitochondrial<br>OS=Mus musculus GN=Fh<br>PE=1 SV=2                                      | 2.3E-12 | 90.3  | 20.3 | 16 (16 0 0<br>0 0)   | Mitochondrion.<br>Cytoplasm.                                                                                                                                                                                                                   |
| P16858 | G3P_MOUSE<br>Glyceraldehyde-3-phosphate<br>dehydrogenase OS=Mus<br>musculus GN=Gapdh PE=1<br>SV=2                          | 1.0E-30 | 226.4 | 39.9 | 115 (110 5<br>0 0 0) | Cytoplasm $\hat{\epsilon}^{\circ}$<br>cytosol. Nucleus.                                                                                                                                                                                        |
| P06745 | G6PI_MOUSE Glucose-6-<br>phosphate isomerase<br>OS=Mus musculus GN=Gpi<br>PE=1 SV=4                                        | 2.4E-11 | 110.3 | 19.5 | 18 (18 0 0<br>0 0)   | Cytoplasm.<br>Secreted.                                                                                                                                                                                                                        |
| P62874 | GBB1_MOUSE Guanine<br>nucleotide-binding protein<br>G(I)/G(S)/G(T) subunit beta-<br>1 OS=Mus musculus<br>GN=Gnb1 PE=1 SV=3 | 2.0E-04 | 20.1  |      | 2 (2 0 0 0<br>0)     | ND                                                                                                                                                                                                                                             |
| Q9D6Y9 | GLGB_MOUSE 1,4-alpha-<br>glucan-branching enzyme<br>OS=Mus musculus<br>GN=Gbe1 PE=2 SV=1                                   | 1.6E-08 | 50.2  | 8.5  | 7 (7 0 0 0<br>0)     | ND                                                                                                                                                                                                                                             |
| P15105 | GLNA_MOUSE Glutamine<br>synthetase OS=Mus<br>musculus GN=Glul PE=1<br>SV=6                                                 | 2.3E-12 | 20.3  | 5.6  | 2 (2 0 0 0<br>0)     | Cytoplasm.<br>Mitochondrion.                                                                                                                                                                                                                   |
| Q9DCZ1 | GMPR1_MOUSE GMP<br>reductase 1 OS=Mus<br>musculus GN=Gmpr PE=2<br>SV=1                                                     | 8.2E-05 | 20.2  | 7.0  | 2 (2 0 0 0<br>0)     | ND                                                                                                                                                                                                                                             |
| P13707 | GPDA_MOUSE Glycerol-3-<br>phosphate dehydrogenase<br>[NAD+], cytoplasmic<br>OS=Mus musculus<br>GN=Gpd1 PE=1 SV=3           | 1.0E-30 | 170.3 | 41.5 | 48 (44 4 0<br>0 0)   | Cytoplasm.                                                                                                                                                                                                                                     |
| Q64521 | GPDM_MOUSE Glycerol-3-<br>phosphate dehydrogenase,<br>mitochondrial OS=Mus<br>musculus GN=Gpd2 PE=1<br>SV=2                | 7.5E-10 | 60.2  | 9.8  | 9 (9 0 0 0<br>0)     | Mitochondrion<br>inner membrane.                                                                                                                                                                                                               |
| Q91Z53 | GRHPR_MOUSE                                                                                                                | 2.0E-08 | 20.2  | 8.5  | 3 (3 0 0 0<br>0)     | ND                                                                                                                                                                                                                                             |

*A novel role of mitochondria in muscle injury*

|        |                                                                                                          |         |       |      |                 |                                                              |
|--------|----------------------------------------------------------------------------------------------------------|---------|-------|------|-----------------|--------------------------------------------------------------|
|        | Glyoxylate reductase/hydroxypyruvate reductase OS=Mus musculus GN=Grhpr PE=1 SV=1                        |         |       |      | 0)              |                                                              |
| P38647 | GRP75_MOUSE Stress-70 protein, mitochondrial OS=Mus musculus GN=Hspa9 PE=1 SV=2                          | 9.7E-14 | 140.3 | 27.0 | 18 (18 0 0 0 0) | Mitochondrion.                                               |
| P20029 | GRP78_MOUSE 78 kDa glucose-regulated protein OS=Mus musculus GN=Hspa5 PE=1 SV=3                          | 4.2E-11 | 120.2 | 25.0 | 17 (17 0 0 0 0) | Endoplasmic reticulum lumen. Melanosome.                     |
| Q9Z1E4 | GYS1_MOUSE Glycogen [starch] synthase, muscle OS=Mus musculus GN=Gys1 PE=1 SV=2                          | 7.8E-15 | 170.3 | 27.2 | 48 (48 0 0 0 0) | ND                                                           |
| P15864 | H12_MOUSE Histone H1.2 OS=Mus musculus GN=Hist1h1c PE=1 SV=2                                             | 1.3E-07 | 20.1  |      | 4 (4 0 0 0 0)   | Nucleus. Chromosome.                                         |
| Q8CGP5 | H2A1F_MOUSE Histone H2A type 1-F OS=Mus musculus GN=Hist1h2af PE=1 SV=3                                  | 6.4E-09 | 20.2  | 21.5 | 4 (4 0 0 0 0)   | Nucleus. Chromosome.                                         |
| P01942 | HBA_MOUSE Hemoglobin subunit alpha OS=Mus musculus GN=Hba PE=1 SV=2                                      | 2.8E-13 | 20.2  | 10.6 | 23 (23 0 0 0 0) | ND                                                           |
| P02088 | HBB1_MOUSE Hemoglobin subunit beta-1 OS=Mus musculus GN=Hbb-b1 PE=1 SV=2                                 | 1.0E-30 | 30.4  | 19.7 | 91 (91 0 0 0 0) | ND                                                           |
| O08756 | HCD2_MOUSE 3-hydroxyacyl-CoA dehydrogenase type-2 OS=Mus musculus GN=Hsd17b10 PE=1 SV=4                  | 1.0E-14 | 20.3  | 14.2 | 21 (21 0 0 0 0) | Mitochondrion.                                               |
| Q61425 | HCDH_MOUSE Hydroxyacyl-coenzyme A dehydrogenase, mitochondrial OS=Mus musculus GN=Hadh PE=1 SV=2         | 4.7E-08 | 40.2  | 15.3 | 6 (6 0 0 0 0)   | Mitochondrion matrix.                                        |
| Q9D1G3 | HHATL_MOUSE Protein-cysteine N-palmitoyltransferase HHAT-like protein OS=Mus musculus GN=Hhatl PE=1 SV=2 | 1.0E-30 | 80.3  | 17.7 | 27 (27 0 0 0 0) | Endoplasmic reticulum membrane; Multi-pass membrane protein. |
| Q61696 | HS71A_MOUSE Heat shock 70 kDa protein 1A OS=Mus musculus GN=Hspa1a PE=1 SV=2                             | 2.2E-13 | 30.2  | 5.9  | 7 (7 0 0 0 0)   | Cytoplasm.                                                   |
| P07901 | HS90A_MOUSE Heat shock protein HSP 90-alpha OS=Mus musculus                                              | 6.7E-10 | 36.2  | 6.5  | 9 (4 5 0 0 0)   | Cytoplasm. Melanosome.                                       |

*A novel role of mitochondria in muscle injury*

|        |                                                                                                                |         |       |      |                |                                                                                                                                 |
|--------|----------------------------------------------------------------------------------------------------------------|---------|-------|------|----------------|---------------------------------------------------------------------------------------------------------------------------------|
|        | GN=Hsp90aa1 PE=1 SV=4                                                                                          |         |       |      |                |                                                                                                                                 |
| P11499 | HS90B_MOUSE Heat shock protein HSP 90-beta OS=Mus musculus GN=Hsp90ab1 PE=1 SV=2                               | 1.8E-14 | 80.3  | 13.5 | 22 (22 0 0 0)  | Cytoplasm. Melanosome.                                                                                                          |
| P17156 | HSP72_MOUSE Heat shock-related 70 kDa protein 2 OS=Mus musculus GN=Hspa2 PE=1 SV=1                             | 1.0E-14 | 50.3  | 8.5  | 13 (13 0 0 0)  | ND                                                                                                                              |
| P63017 | HSP7C_MOUSE Heat shock cognate 71 kDa protein OS=Mus musculus GN=Hspa8 PE=1 SV=1                               | 4.5E-12 | 230.3 | 29.4 | 47 (47 0 0 0)  | Cytoplasm. Melanosome.                                                                                                          |
| P14602 | HSPB1_MOUSE Heat shock protein beta-1 OS=Mus musculus GN=Hspb1 PE=1 SV=3                                       | 1.1E-09 | 30.2  | 16.7 | 6 (6 0 0 0)    | Cytoplasm. Nucleus. Cytoplasmic cytoskeleton spindle.                                                                           |
| Q5EBG6 | HSPB6_MOUSE Heat shock protein beta-6 OS=Mus musculus GN=Hspb6 PE=1 SV=1                                       | 8.2E-09 | 20.2  | 8.0  | 13 (13 0 0 0)  | Cytoplasm. Nucleus.                                                                                                             |
| O08528 | HXK2_MOUSE Hexokinase-2 OS=Mus musculus GN=Hk2 PE=1 SV=1                                                       | 2.5E-07 | 20.2  | 3.2  | 4 (4 0 0 0)    | ND                                                                                                                              |
| Q9D379 | HYEP_MOUSE Epoxide hydrolase 1 OS=Mus musculus GN=Ephx1 PE=1 SV=1                                              | 2.2E-07 | 60.1  | 11.4 | 7 (7 0 0 0)    | Microsome membrane; Single-pass type II membrane protein. Endoplasmic reticulum membrane; Single-pass type II membrane protein. |
| Q9D6R2 | IDH3A_MOUSE Isocitrate dehydrogenase [NAD] subunit alpha, mitochondrial OS=Mus musculus GN=Idh3a PE=1 SV=1     | 3.4E-12 | 188.3 | 31.4 | 75 (62 11 2 0) | Mitochondrion.                                                                                                                  |
| P54071 | IDHP_MOUSE Isocitrate dehydrogenase [NADP], mitochondrial OS=Mus musculus GN=Idh2 PE=1 SV=3                    | 1.2E-10 | 100.2 | 21.7 | 20 (20 0 0 0)  | Mitochondrion.                                                                                                                  |
| Q6ZWX6 | IF2A_MOUSE Eukaryotic translation initiation factor 2 subunit 1 OS=Mus musculus GN=Eif2s1 PE=1 SV=3            | 7.3E-08 | 20.2  | 8.6  | 3 (3 0 0 0)    | Cytoplasmic granule.                                                                                                            |
| Q9Z0N1 | IF2G_MOUSE Eukaryotic translation initiation factor 2 subunit 3, X-linked OS=Mus musculus GN=Eif2s3x PE=1 SV=2 | 1.4E-08 | 30.1  | 7.4  | 3 (3 0 0 0)    | ND                                                                                                                              |

*A novel role of mitochondria in muscle injury*

|        |                                                                                            |         |       |      |                    |                                                                                                                                                                                          |
|--------|--------------------------------------------------------------------------------------------|---------|-------|------|--------------------|------------------------------------------------------------------------------------------------------------------------------------------------------------------------------------------|
| P60843 | IF4A1_MOUSE Eukaryotic initiation factor 4A-I<br>OS=Mus musculus<br>GN=Eif4a1 PE=2 SV=1    | 6.5E-10 | 40.2  | 9.4  | 5 (5 0 0 0<br>0)   | ND                                                                                                                                                                                       |
| Q8CAQ8 | IMMT_MOUSE Mitochondrial inner membrane protein OS=Mus musculus GN=Immt PE=1 SV=1          | 1.4E-13 | 140.2 | 17.0 | 27 (27 0 0<br>0 0) | Mitochondrion inner membrane.                                                                                                                                                            |
| Q8BKC5 | IPO5_MOUSE Importin-5 OS=Mus musculus GN=Ipo5 PE=1 SV=3                                    | 2.2E-08 | 50.2  | 6.4  | 7 (7 0 0 0<br>0)   | Cytoplasm. Nucleus.                                                                                                                                                                      |
| Q9EPL8 | IPO7_MOUSE Importin-7 OS=Mus musculus GN=Ipo7 PE=1 SV=2                                    | 2.5E-06 | 30.2  | 3.8  | 3 (3 0 0 0<br>0)   | Cytoplasm. Nucleus.                                                                                                                                                                      |
| Q61738 | ITA7_MOUSE Integrin alpha-7 OS=Mus musculus GN=Itga7 PE=1 SV=2                             | 1.5E-08 | 30.2  | 2.8  | 3 (3 0 0 0<br>0)   | Membrane; Single-pass type I membrane protein.                                                                                                                                           |
| P09055 | ITB1_MOUSE Integrin beta-1 OS=Mus musculus GN=Itgb1 PE=1 SV=1                              | 1.4E-09 | 48.2  | 9.8  | 9 (7 2 0 0<br>0)   | Cell membrane; Single-pass type I membrane protein. Melanosome.                                                                                                                          |
| Q9JHI5 | IVD_MOUSE Isovaleryl-CoA dehydrogenase, mitochondrial OS=Mus musculus GN=Ivd PE=1 SV=1     | 2.0E-07 | 30.2  | 7.5  | 3 (3 0 0 0<br>0)   | Mitochondrion matrix.                                                                                                                                                                    |
| Q9ET78 | JPH2_MOUSE Junctophilin-2 OS=Mus musculus GN=Jph2 PE=1 SV=2                                | 1.0E-06 | 20.1  |      | 2 (2 0 0 0<br>0)   | Cell membrane; Peripheral membrane protein. Endoplasmic reticulum membrane; Single-pass type IV membrane protein. Sarcoplasmic reticulum membrane; Single-pass type IV membrane protein. |
| Q3MI48 | JSRP1_MOUSE Junctional sarcoplasmic reticulum protein 1 OS=Mus musculus GN=Jsrp1 PE=1 SV=2 | 1.3E-12 | 50.2  | 15.1 | 7 (7 0 0 0<br>0)   | Sarcoplasmic reticulum membrane. Endoplasmic reticulum membrane.                                                                                                                         |
| Q8C7X2 | K0090_MOUSE Uncharacterized protein KIAA0090 OS=Mus musculus GN=Kiaa0090 PE=1 SV=1         | 3.8E-09 | 30.2  | 4.7  | 4 (4 0 0 0<br>0)   | Membrane; Single-pass type I membrane protein.                                                                                                                                           |
| P02535 | K1C10_MOUSE Keratin, type I cytoskeletal 10 OS=Mus musculus GN=Krt10 PE=1 SV=3             | 2.4E-09 | 68.2  | 9.5  | 55 (54 1 0<br>0 0) | ND                                                                                                                                                                                       |

|        |                                                                                                  |         |       |      |                       |                                                                                               |
|--------|--------------------------------------------------------------------------------------------------|---------|-------|------|-----------------------|-----------------------------------------------------------------------------------------------|
| Q61781 | K1C14_MOUSE Keratin, type I cytoskeletal 14<br>OS=Mus musculus<br>GN=Krt14 PE=1 SV=2             | 4.9E-05 | 20.2  | 4.5  | 2 (2 0 0 0<br>0)      | Cytoplasm.<br>Nucleus.                                                                        |
| Q3TTY5 | K22E_MOUSE Keratin, type II cytoskeletal 2 epidermal<br>OS=Mus musculus GN=Krt2<br>PE=1 SV=1     | 2.1E-07 | 30.2  | 4.5  | 13 (13 0 0<br>0 0)    | ND                                                                                            |
| P04104 | K2C1_MOUSE Keratin, type II cytoskeletal 1 OS=Mus musculus GN=Krt1 PE=1 SV=4                     | 9.8E-08 | 20.2  | 1.7  | 15 (15 0 0<br>0 0)    | Cell membrane.                                                                                |
| Q6IFZ6 | K2C1B_MOUSE Keratin, type II cytoskeletal 1b OS=Mus musculus GN=Krt77 PE=1 SV=1                  | 1.3E-08 | 30.2  | 3.8  | 25 (25 0 0<br>0 0)    | ND                                                                                            |
| Q922U2 | K2C5_MOUSE Keratin, type II cytoskeletal 5 OS=Mus musculus GN=Krt5 PE=1 SV=1                     | 6.9E-08 | 30.2  | 5.2  | 30 (30 0 0<br>0 0)    | ND                                                                                            |
| P11679 | K2C8_MOUSE Keratin, type II cytoskeletal 8 OS=Mus musculus GN=Krt8 PE=1 SV=4                     | 2.0E-08 | 28.2  | 2.9  | 17 (16 1 0<br>0 0)    | Cytoplasm.<br>Nucleus<br>nucleoplasm.<br>Nucleus matrix.                                      |
| P47857 | K6PF_MOUSE 6-phosphofructokinase, muscle type OS=Mus musculus GN=Pfkm PE=1 SV=3                  | 1.0E-30 | 444.3 | 45.3 | 325 (311<br>14 0 0 0) | ND                                                                                            |
| Q9R0Y5 | KAD1_MOUSE Adenylate kinase isoenzyme 1 OS=Mus musculus GN=Ak1 PE=1 SV=1                         | 9.7E-11 | 30.2  | 20.6 | 16 (16 0 0<br>0 0)    | Cytoplasm.                                                                                    |
| Q9D783 | KBTB5_MOUSE Kelch repeat and BTB domain-containing protein 5 OS=Mus musculus GN=Kbtbd5 PE=2 SV=1 | 2.3E-09 | 50.2  | 10.6 | 6 (6 0 0 0<br>0)      | ND                                                                                            |
| Q04447 | KCRB_MOUSE Creatine kinase B-type OS=Mus musculus GN=Ckb PE=1 SV=1                               | 7.2E-09 | 20.2  | 3.4  | 2 (2 0 0 0<br>0)      | Cytoplasm.                                                                                    |
| P07310 | KCRM_MOUSE Creatine kinase M-type OS=Mus musculus GN=Ckm PE=1 SV=1                               | 6.7E-15 | 150.3 | 44.4 | 175 (175 0<br>0 0 0)  | Cytoplasm.                                                                                    |
| Q6P8J7 | KCRS_MOUSE Creatine kinase S-type, mitochondrial OS=Mus musculus GN=Ckmt2 PE=1 SV=1              | 3.3E-15 | 120.3 | 24.1 | 91 (91 0 0<br>0 0)    | Mitochondrion<br>inner membrane;<br>Peripheral<br>membrane protein;<br>Intermembrane<br>side. |
| O35367 | KERA_MOUSE Keratocan OS=Mus musculus GN=Kera PE=2 SV=1                                           | 3.0E-09 | 40.3  | 17.1 | 10 (10 0 0<br>0 0)    | Secreted<br>extracellular space<br>extracellular<br>matrix.                                   |



|        |                                                                                                                        |         |       |      |                   |                                                                                                                                                 |
|--------|------------------------------------------------------------------------------------------------------------------------|---------|-------|------|-------------------|-------------------------------------------------------------------------------------------------------------------------------------------------|
| P33175 | KIF5A_MOUSE Kinesin heavy chain isoform 5A OS=Mus musculus GN=Kif5a PE=1 SV=3                                          | 3.0E-07 | 30.2  | 3.3  | 3 (3 0 0 0 0)     | Cytoplasm $\hat{\epsilon}^{\circ}$ perinuclear region. Cytoplasm $\hat{\epsilon}^{\circ}$ cytoskeleton.                                         |
| Q61768 | KINH_MOUSE Kinesin-1 heavy chain OS=Mus musculus GN=Kif5b PE=1 SV=2                                                    | 2.8E-09 | 30.2  | 5.3  | 3 (3 0 0 0 0)     | Cytoplasm $\hat{\epsilon}^{\circ}$ cytoskeleton.                                                                                                |
| P18826 | KPB1_MOUSE Phosphorylase b kinase regulatory subunit alpha, skeletal muscle isoform OS=Mus musculus GN=Phka1 PE=1 SV=2 | 6.1E-08 | 30.2  | 2.8  | 10 (10 0 0 0 0)   | Cell membrane; Lipid-anchor; Cytoplasmic side.                                                                                                  |
| Q7TSH2 | KPBB_MOUSE Phosphorylase b kinase regulatory subunit beta OS=Mus musculus GN=Phkb PE=1 SV=1                            | 4.2E-09 | 100.2 | 8.8  | 15 (15 0 0 0 0)   | Cell membrane; Lipid-anchor; Cytoplasmic side.                                                                                                  |
| P52480 | KPYM_MOUSE Pyruvate kinase isozymes M1/M2 OS=Mus musculus GN=Pkm2 PE=1 SV=4                                            | 1.3E-14 | 240.3 | 33.5 | 151 (151 0 0 0 0) | Cytoplasm. Nucleus.                                                                                                                             |
| Q61595 | KTN1_MOUSE Kinectin OS=Mus musculus GN=Ktn1 PE=1 SV=1                                                                  | 2.7E-10 | 20.2  | 3.2  | 2 (2 0 0 0 0)     | Endoplasmic reticulum membrane; Single-pass type II membrane protein.                                                                           |
| Q60675 | LAMA2_MOUSE Laminin subunit alpha-2 OS=Mus musculus GN=Lama2 PE=1 SV=1                                                 | 1.0E-30 | 250.4 | 10.2 | 49 (49 0 0 0 0)   | Secreted $\hat{\epsilon}^{\circ}$ extracellular space $\hat{\epsilon}^{\circ}$ extracellular matrix $\hat{\epsilon}^{\circ}$ basement membrane. |
| Q61001 | LAMA5_MOUSE Laminin subunit alpha-5 OS=Mus musculus GN=Lama5 PE=1 SV=3                                                 | 2.6E-06 | 20.2  | 0.7  | 3 (3 0 0 0 0)     | Secreted $\hat{\epsilon}^{\circ}$ extracellular space $\hat{\epsilon}^{\circ}$ extracellular matrix $\hat{\epsilon}^{\circ}$ basement membrane. |
| P02469 | LAMB1_MOUSE Laminin subunit beta-1 OS=Mus musculus GN=Lamb1-1 PE=1 SV=2                                                | 4.4E-15 | 110.3 | 7.8  | 34 (34 0 0 0 0)   | Secreted $\hat{\epsilon}^{\circ}$ extracellular space $\hat{\epsilon}^{\circ}$ extracellular matrix $\hat{\epsilon}^{\circ}$ basement membrane. |
| Q61292 | LAMB2_MOUSE Laminin subunit beta-2 OS=Mus musculus GN=Lamb2 PE=2 SV=1                                                  | 1.1E-12 | 170.2 | 10.3 | 33 (33 0 0 0 0)   | Secreted $\hat{\epsilon}^{\circ}$ extracellular space $\hat{\epsilon}^{\circ}$ extracellular matrix $\hat{\epsilon}^{\circ}$ basement membrane. |
| P02468 | LAMC1_MOUSE Laminin subunit gamma-1 OS=Mus musculus GN=Lamc1 PE=1                                                      | 6.5E-13 | 140.3 | 10.5 | 37 (37 0 0 0 0)   | Secreted $\hat{\epsilon}^{\circ}$ extracellular space $\hat{\epsilon}^{\circ}$ extracellular                                                    |

*A novel role of mitochondria in muscle injury*

|        |                                                                                                                |         |       |      |                 |                                                                                                                                                                                                                                 |
|--------|----------------------------------------------------------------------------------------------------------------|---------|-------|------|-----------------|---------------------------------------------------------------------------------------------------------------------------------------------------------------------------------------------------------------------------------|
|        | SV=2                                                                                                           |         |       |      |                 | matrix<br>basement<br>membrane.                                                                                                                                                                                                 |
| Q9JKS4 | LDB3_MOUSE LIM domain-binding protein 3<br>OS=Mus musculus<br>GN=Ldb3 PE=1 SV=1                                | 1.9E-10 | 128.3 | 18.0 | 36 (35 1 0 0 0) | Cytoplasm<br>perinuclear region.<br>Cell projection<br>pseudopodium.<br>Cytoplasm<br>cytoskeleton.<br>Cytoplasm<br>myofibril<br>sarcomere<br>Z line.                                                                            |
| P06151 | LDHA_MOUSE L-lactate dehydrogenase A chain<br>OS=Mus musculus GN=Ldha PE=1 SV=3                                | 2.7E-13 | 156.3 | 32.5 | 57 (55 2 0 0 0) | Cytoplasm.                                                                                                                                                                                                                      |
| P16125 | LDHB_MOUSE L-lactate dehydrogenase B chain<br>OS=Mus musculus<br>GN=Ldhb PE=1 SV=2                             | 1.8E-08 | 80.2  | 25.4 | 15 (15 0 0 0 0) | Cytoplasm.                                                                                                                                                                                                                      |
| P24527 | LKHA4_MOUSE Leukotriene A-4 hydrolase<br>OS=Mus musculus<br>GN=Lta4h PE=1 SV=3                                 | 1.1E-07 | 20.2  | 3.9  | 2 (2 0 0 0 0)   | Cytoplasm.                                                                                                                                                                                                                      |
| Q9D0F3 | LMAN1_MOUSE Protein ERGIC-53<br>OS=Mus musculus GN=Lman1 PE=2 SV=1                                             | 1.2E-08 | 20.1  |      | 2 (2 0 0 0 0)   | Endoplasmic reticulum-Golgi intermediate compartment membrane; Single-pass type I membrane protein.<br>Golgi apparatus membrane; Single-pass membrane protein.<br>Endoplasmic reticulum membrane; Single-pass membrane protein. |
| P48678 | LMNA_MOUSE Prelamin-A/C<br>OS=Mus musculus<br>GN=Lmna PE=1 SV=2                                                | 2.3E-07 | 20.2  | 2.9  | 4 (4 0 0 0 0)   | Nucleus. Nucleus envelope.                                                                                                                                                                                                      |
| Q6PB66 | LPPRC_MOUSE Leucine-rich PPR motif-containing protein, mitochondrial<br>OS=Mus musculus<br>GN=Lrpprc PE=1 SV=2 | 4.8E-06 | 30.1  | 2.2  | 4 (4 0 0 0 0)   | Mitochondrion.<br>Nucleus. Nucleus<br>nucleoplasm.<br>Nucleus inner membrane.<br>Nucleus outer membrane.                                                                                                                        |
| Q9CR62 | M2OM_MOUSE Mitochondrial 2-oxoglutarate/malate carrier protein<br>OS=Mus musculus                              | 2.8E-12 | 60.2  | 21.7 | 12 (12 0 0 0 0) | Mitochondrion inner membrane; Multi-pass membrane protein.                                                                                                                                                                      |

*A novel role of mitochondria in muscle injury*

|        |                                                                                                            |         |       |      |                 |                                                                                                                 |
|--------|------------------------------------------------------------------------------------------------------------|---------|-------|------|-----------------|-----------------------------------------------------------------------------------------------------------------|
|        | GN=Slc25a11 PE=1 SV=3                                                                                      |         |       |      |                 |                                                                                                                 |
| Q91W89 | MA2C1_MOUSE Alpha-mannosidase 2C1 OS=Mus musculus GN=Man2c1 PE=1 SV=1                                      | 5.0E-10 | 20.2  | 2.5  | 2 (2 0 0 0 0)   | ND                                                                                                              |
| P06801 | MAOX_MOUSE NADP-dependent malic enzyme OS=Mus musculus GN=Me1 PE=1 SV=1                                    | 4.0E-10 | 40.2  | 6.3  | 6 (6 0 0 0 0)   | Cytoplasm.                                                                                                      |
| Q9Z2Z6 | MCAT_MOUSE Mitochondrial carnitine/acylcarnitine carrier protein OS=Mus musculus GN=Slc25a20 PE=1 SV=1     | 2.9E-04 | 20.1  | 3.0  | 2 (2 0 0 0 0)   | Mitochondrion inner membrane; Multi-pass membrane protein.                                                      |
| Q99MR8 | MCCA_MOUSE Methylcrotonoyl-CoA carboxylase subunit alpha, mitochondrial OS=Mus musculus GN=Mccc1 PE=2 SV=2 | 2.5E-09 | 20.2  | 4.6  | 5 (5 0 0 0 0)   | Mitochondrion matrix.                                                                                           |
| Q3ULD5 | MCCB_MOUSE Methylcrotonoyl-CoA carboxylase beta chain, mitochondrial OS=Mus musculus GN=Mccc2 PE=2 SV=1    | 3.8E-09 | 90.2  | 14.0 | 11 (11 0 0 0 0) | Mitochondrion matrix.                                                                                           |
| P14152 | MDHC_MOUSE Malate dehydrogenase, cytoplasmic OS=Mus musculus GN=Mdh1 PE=1 SV=3                             | 2.6E-12 | 60.2  | 23.1 | 16 (16 0 0 0 0) | Cytoplasm.                                                                                                      |
| P08249 | MDHM_MOUSE Malate dehydrogenase, mitochondrial OS=Mus musculus GN=Mdh2 PE=1 SV=3                           | 8.9E-15 | 140.3 | 39.9 | 51 (51 0 0 0 0) | Mitochondrion matrix.                                                                                           |
| Q62000 | MIME_MOUSE Mimecan OS=Mus musculus GN=Ogn PE=2 SV=1                                                        | 3.4E-08 | 30.2  | 16.4 | 4 (4 0 0 0 0)   | Secreted $\hat{\circ}$ extracellular space $\hat{\circ}$ extracellular matrix.                                  |
| P05977 | MLE1_MOUSE Myosin light chain 1, skeletal muscle isoform OS=Mus musculus GN=Myl1 PE=1 SV=2                 | 1.5E-10 | 60.2  | 24.5 | 47 (47 0 0 0 0) | ND                                                                                                              |
| P97457 | MLRS_MOUSE Myosin regulatory light chain 2, skeletal muscle isoform OS=Mus musculus GN=My1pf PE=1 SV=3     | 1.2E-05 | 30.2  | 16.6 | 3 (3 0 0 0 0)   | ND                                                                                                              |
| P26041 | MOES_MOUSE Moesin OS=Mus musculus GN=Msn PE=1 SV=3                                                         | 1.4E-14 | 118.3 | 19.2 | 24 (22 2 0 0 0) | Cell membrane; Peripheral membrane protein; Cytoplasmic side. Cytoplasm $\hat{\circ}$ cytoskeleton. Apical cell |

*A novel role of mitochondria in muscle injury*

|        |                                                                                          |         |        |      |                     |                                                                                                                                                                              |
|--------|------------------------------------------------------------------------------------------|---------|--------|------|---------------------|------------------------------------------------------------------------------------------------------------------------------------------------------------------------------|
|        |                                                                                          |         |        |      |                     | membrane;<br>Peripheral<br>membrane protein;<br>Cytoplasmic side.<br>Cell projection â€°<br>microvillus<br>membrane;<br>Peripheral<br>membrane protein;<br>Cytoplasmic side. |
| Q8VEM8 | MPCP_MOUSE Phosphate carrier protein, mitochondrial OS=Mus musculus GN=Slc25a3 PE=1 SV=1 | 1.9E-12 | 100.2  | 23.8 | 29 (29 0 0 0 0)     | Mitochondrion inner membrane; Multi-pass membrane protein.                                                                                                                   |
| P28665 | MUG1_MOUSE Murinoglobulin-1 OS=Mus musculus GN=Mug1 PE=1 SV=3                            | 6.1E-06 | 20.2   | 1.1  | 2 (2 0 0 0 0)       | Secreted.                                                                                                                                                                    |
| P11588 | MUP1_MOUSE Major urinary protein 1 OS=Mus musculus GN=Mup1 PE=1 SV=1                     | 1.5E-10 | 20.3   | 18.9 | 26 (26 0 0 0 0)     | Secreted.                                                                                                                                                                    |
| Q9EQK5 | MVP_MOUSE Major vault protein OS=Mus musculus GN=Mvp PE=1 SV=3                           | 2.6E-07 | 30.2   | 4.4  | 3 (3 0 0 0 0)       | Cytoplasm.<br>Nucleus.                                                                                                                                                       |
| P70402 | MYBPH_MOUSE Myosin-binding protein H OS=Mus musculus GN=Mybph PE=1 SV=1                  | 5.3E-08 | 20.2   | 8.1  | 2 (2 0 0 0 0)       | ND                                                                                                                                                                           |
| Q5SX40 | MYH1_MOUSE Myosin-1 OS=Mus musculus GN=Myh1 PE=1 SV=1                                    | 1.0E-30 | 1434.4 | 51.3 | 986 (878 108 0 0 0) | Cytoplasm â€°<br>myofibril.                                                                                                                                                  |
| O08638 | MYH11_MOUSE Myosin-11 OS=Mus musculus GN=Myh11 PE=1 SV=1                                 | 9.2E-12 | 60.3   | 3.9  | 8 (8 0 0 0 0)       | Melanosome.<br>Cytoplasm â€°<br>myofibril.                                                                                                                                   |
| P13541 | MYH3_MOUSE Myosin-3 OS=Mus musculus GN=Myh3 PE=2 SV=2                                    | 1.1E-10 | 66.4   | 3.7  | 16 (14 2 0 0 0)     | Cytoplasm â€°<br>myofibril.                                                                                                                                                  |
| Q5SX39 | MYH4_MOUSE Myosin-4 OS=Mus musculus GN=Myh4 PE=1 SV=1                                    | 1.1E-15 | 608.3  | 21.1 | 333 (332 1 0 0 0)   | Cytoplasm â€°<br>myofibril.                                                                                                                                                  |
| Q02566 | MYH6_MOUSE Myosin-6 OS=Mus musculus GN=Myh6 PE=1 SV=2                                    | 1.1E-15 | 256.4  | 12.8 | 74 (70 4 0 0 0)     | Cytoplasm â€°<br>myofibril.                                                                                                                                                  |
| Q91Z83 | MYH7_MOUSE Myosin-7 OS=Mus musculus GN=Myh7 PE=1 SV=1                                    | 2.2E-14 | 228.3  | 12.1 | 64 (63 1 0 0 0)     | Cytoplasm â€°<br>myofibril.                                                                                                                                                  |
| P13542 | MYH8_MOUSE Myosin-8 OS=Mus musculus GN=Myh8 PE=1 SV=2                                    | 7.1E-14 | 56.3   | 4.0  | 14 (9 5 0 0 0)      | Cytoplasm â€°<br>myofibril.                                                                                                                                                  |
| Q8VDD5 | MYH9_MOUSE Myosin-9 OS=Mus musculus GN=Myh9 PE=1 SV=4                                    | 4.3E-11 | 20.2   | 1.7  | 2 (2 0 0 0 0)       | ND                                                                                                                                                                           |
| P05977 | MYL1_MOUSE Myosin light chain 1/3, skeletal                                              | 7.6E-12 | 124.2  | 50.5 | 58 (54 4 0 0 0)     | ND                                                                                                                                                                           |

*A novel role of mitochondria in muscle injury*

|        |                                                                                       |         |       |      |                   |                                                                                                             |
|--------|---------------------------------------------------------------------------------------|---------|-------|------|-------------------|-------------------------------------------------------------------------------------------------------------|
|        | muscle isoform OS=Mus musculus GN=My11 PE=1 SV=2                                      |         |       |      |                   |                                                                                                             |
| P09542 | MYL3_MOUSE Myosin light chain 3 OS=Mus musculus GN=My13 PE=2 SV=4                     | 8.2E-14 | 50.3  | 37.3 | 24 (24 0 0 0 0)   | ND                                                                                                          |
| Q8CI43 | MYL6B_MOUSE Myosin light chain 6B OS=Mus musculus GN=My16b PE=2 SV=1                  | 5.4E-05 | 20.2  | 14.0 | 2 (2 0 0 0 0)     | ND                                                                                                          |
| Q62234 | MYOM1_MOUSE Myomesin-1 OS=Mus musculus GN=Myom1 PE=1 SV=2                             | 2.8E-14 | 150.4 | 11.8 | 52 (52 0 0 0 0)   | ND                                                                                                          |
| A2ABU4 | MYOM3_MOUSE Myomesin-3 OS=Mus musculus GN=Myom3 PE=2 SV=1                             | 2.6E-13 | 120.3 | 13.3 | 15 (15 0 0 0 0)   | ND                                                                                                          |
| Q9JIF9 | MYOTI_MOUSE Myotilin OS=Mus musculus GN=Myot PE=2 SV=1                                | 3.6E-09 | 40.2  | 7.1  | 5 (5 0 0 0 0)     | Cell membrane â€° sarcolemma. Cytoplasm â€° cytoskeleton. Cytoplasm â€° myofibril â€° sarcomere â€° Z line. |
| Q9JK37 | MYOZ1_MOUSE Myozenin-1 OS=Mus musculus GN=Myoz1 PE=1 SV=1                             | 5.1E-07 | 20.2  | 4.4  | 2 (2 0 0 0 0)     | Nucleus. Cell projection â€° pseudopodium.                                                                  |
| P27573 | MYP0_MOUSE Myelin protein P0 OS=Mus musculus GN=Mpz PE=1 SV=1                         | 1.7E-06 | 20.1  | 9.3  | 2 (2 0 0 0 0)     | Membrane; Single-pass type I membrane protein.                                                              |
| Q5XKE0 | MYPC2_MOUSE Myosin-binding protein C, fast-type OS=Mus musculus GN=Mybpc2 PE=1 SV=1   | 3.3E-16 | 550.3 | 50.1 | 321 (321 0 0 0 0) | ND                                                                                                          |
| Q99KQ4 | NAMPT_MOUSE Nicotinamide phosphoribosyltransferase OS=Mus musculus GN=Nampt PE=1 SV=1 | 2.7E-14 | 30.3  | 12.0 | 3 (3 0 0 0 0)     | Cytoplasm.                                                                                                  |
| Q9DB73 | NB5R1_MOUSE NADH-cytochrome b5 reductase 1 OS=Mus musculus GN=Cyb5r1 PE=2 SV=1        | 3.3E-06 | 30.1  | 10.2 | 3 (3 0 0 0 0)     | Membrane; Single-pass membrane protein.                                                                     |
| Q9DCN2 | NB5R3_MOUSE NADH-cytochrome b5 reductase 3 OS=Mus musculus GN=Cyb5r3 PE=1 SV=3        | 6.2E-10 | 30.2  | 14.6 | 4 (4 0 0 0 0)     | Endoplasmic reticulum membrane; Lipid-anchor; Cytoplasmic side. Mitochondrion outer membrane;               |

|        |                                                                                                                                              |         |       |      |                    |                                                                                                  |
|--------|----------------------------------------------------------------------------------------------------------------------------------------------|---------|-------|------|--------------------|--------------------------------------------------------------------------------------------------|
|        |                                                                                                                                              |         |       |      |                    | Lipid-anchor;<br>Cytoplasmic side.<br>Cytoplasm &°<br>cytosol.                                   |
| Q8VCM8 | NCLN_MOUSE Nicalin<br>OS=Mus musculus GN=Ncln<br>PE=2 SV=2                                                                                   | 8.0E-05 | 20.2  | 1.4  | 2 (2 0 0 0<br>0)   | Endoplasmic<br>reticulum<br>membrane; Single-<br>pass membrane<br>protein.                       |
| P15532 | NDKA_MOUSE Nucleoside<br>diphosphate kinase A<br>OS=Mus musculus<br>GN=Nme1 PE=1 SV=1                                                        | 4.3E-06 | 20.2  | 19.1 | 8 (8 0 0 0<br>0)   | Cytoplasm.<br>Nucleus.                                                                           |
| Q9QYG0 | NDRG2_MOUSE Protein<br>NDRG2 OS=Mus musculus<br>GN=Ndr2 PE=1 SV=1                                                                            | 1.0E-30 | 50.3  | 15.9 | 16 (16 0 0<br>0 0) | Cytoplasm.                                                                                       |
| Q9CQ75 | NDUA2_MOUSE NADH<br>dehydrogenase [ubiquinone]<br>1 alpha subcomplex subunit 2<br>OS=Mus musculus<br>GN=Ndufa2 PE=1 SV=3                     | 1.7E-11 | 30.2  | 38.4 | 5 (5 0 0 0<br>0)   | Mitochondrion<br>inner membrane;<br>Peripheral<br>membrane protein;<br>Matrix side.              |
| Q9DCJ5 | NDUA8_MOUSE NADH<br>dehydrogenase [ubiquinone]<br>1 alpha subcomplex subunit 8<br>OS=Mus musculus<br>GN=Ndufa8 PE=1 SV=3                     | 4.8E-06 | 20.3  | 9.9  | 3 (3 0 0 0<br>0)   | Mitochondrion.<br>Mitochondrion<br>intermembrane<br>space.                                       |
| Q9DC69 | NDUA9_MOUSE NADH<br>dehydrogenase [ubiquinone]<br>1 alpha subcomplex subunit<br>9, mitochondrial OS=Mus<br>musculus GN=Ndufa9 PE=1<br>SV=1   | 2.2E-14 | 110.3 | 41.4 | 21 (21 0 0<br>0 0) | Mitochondrion<br>matrix.                                                                         |
| Q99LC3 | NDUAA_MOUSE NADH<br>dehydrogenase [ubiquinone]<br>1 alpha subcomplex subunit<br>10, mitochondrial OS=Mus<br>musculus GN=Ndufa10<br>PE=1 SV=1 | 1.4E-12 | 60.2  | 23.1 | 9 (9 0 0 0<br>0)   | Mitochondrion<br>matrix.                                                                         |
| Q9ERS2 | NDUAD_MOUSE NADH<br>dehydrogenase [ubiquinone]<br>1 alpha subcomplex subunit<br>13 OS=Mus musculus<br>GN=Ndufa13 PE=1 SV=3                   | 7.5E-05 | 20.1  | 13.2 | 4 (4 0 0 0<br>0)   | Mitochondrion<br>inner membrane;<br>Single-pass<br>membrane protein;<br>Matrix side.<br>Nucleus. |
| Q9CQJ8 | NDUB9_MOUSE NADH<br>dehydrogenase [ubiquinone]<br>1 beta subcomplex subunit 9<br>OS=Mus musculus<br>GN=Ndufb9 PE=1 SV=3                      | 4.2E-08 | 20.2  | 11.7 | 2 (2 0 0 0<br>0)   | Mitochondrion<br>inner membrane;<br>Peripheral<br>membrane protein;<br>Matrix side.              |
| Q9DCS9 | NDUBA_MOUSE NADH<br>dehydrogenase [ubiquinone]<br>1 beta subcomplex subunit 10<br>OS=Mus musculus<br>GN=Ndufb10 PE=1 SV=3                    | 7.0E-13 | 20.2  | 17.0 | 2 (2 0 0 0<br>0)   | Mitochondrion<br>inner membrane;<br>Peripheral<br>membrane protein;<br>Matrix side.              |
| Q91VD9 | NDUS1_MOUSE NADH-                                                                                                                            | 9.4E-13 | 300.3 | 34.3 | 59 (59 0 0         | Mitochondrion                                                                                    |

|        |                                                                                                                                     |         |       |      |                    |                                                                                                                                                                |
|--------|-------------------------------------------------------------------------------------------------------------------------------------|---------|-------|------|--------------------|----------------------------------------------------------------------------------------------------------------------------------------------------------------|
|        | ubiquinone oxidoreductase<br>75 kDa subunit,<br>mitochondrial OS=Mus<br>musculus GN=Ndufs1 PE=1<br>SV=1                             |         |       |      | 0 0)               | inner membrane.                                                                                                                                                |
| Q91WD5 | NDUS2_MOUSE NADH<br>dehydrogenase [ubiquinone]<br>iron-sulfur protein 2,<br>mitochondrial OS=Mus<br>musculus GN=Ndufs2 PE=1<br>SV=1 | 4.6E-12 | 170.3 | 41.0 | 26 (26 0 0<br>0 0) | Mitochondrion<br>inner membrane;<br>Peripheral<br>membrane protein;<br>Matrix side.                                                                            |
| Q9DCT2 | NDUS3_MOUSE NADH<br>dehydrogenase [ubiquinone]<br>iron-sulfur protein 3,<br>mitochondrial OS=Mus<br>musculus GN=Ndufs3 PE=1<br>SV=2 | 1.4E-11 | 70.2  | 30.4 | 19 (19 0 0<br>0 0) | Mitochondrion<br>inner membrane.                                                                                                                               |
| Q9DC70 | NDUS7_MOUSE NADH<br>dehydrogenase [ubiquinone]<br>iron-sulfur protein 7,<br>mitochondrial OS=Mus<br>musculus GN=Ndufs7 PE=1<br>SV=1 | 2.3E-04 | 20.2  | 8.0  | 6 (6 0 0 0<br>0)   | Mitochondrion.                                                                                                                                                 |
| Q91YT0 | NDUV1_MOUSE NADH<br>dehydrogenase [ubiquinone]<br>flavoprotein 1, mitochondrial<br>OS=Mus musculus<br>GN=Ndufv1 PE=1 SV=1           | 1.2E-14 | 120.2 | 24.1 | 23 (23 0 0<br>0 0) | Mitochondrion<br>inner membrane;<br>Peripheral<br>membrane protein;<br>Matrix side.                                                                            |
| Q9D6J6 | NDUV2_MOUSE NADH<br>dehydrogenase [ubiquinone]<br>flavoprotein 2, mitochondrial<br>OS=Mus musculus<br>GN=Ndufv2 PE=1 SV=2           | 4.5E-05 | 30.2  | 4.4  | 5 (5 0 0 0<br>0)   | Mitochondrion<br>inner membrane.                                                                                                                               |
| P10493 | NID1_MOUSE Nidogen-1<br>OS=Mus musculus GN=Nid1<br>PE=1 SV=1                                                                        | 1.5E-12 | 70.2  | 6.5  | 18 (18 0 0<br>0 0) | Secreted $\hat{\epsilon}^{\circ}$<br>extracellular space<br>$\hat{\epsilon}^{\circ}$ extracellular<br>matrix $\hat{\epsilon}^{\circ}$<br>basement<br>membrane. |
| O55126 | NIPS2_MOUSE Protein<br>NipSnap homolog 2 OS=Mus<br>musculus GN=Gbas PE=2<br>SV=1                                                    | 2.8E-08 | 50.2  | 16.4 | 7 (7 0 0 0<br>0)   | ND                                                                                                                                                             |
| P60670 | NPL4_MOUSE Nuclear<br>protein localization protein 4<br>homolog OS=Mus musculus<br>GN=Nploc4 PE=1 SV=3                              | 1.1E-13 | 20.2  | 5.4  | 2 (2 0 0 0<br>0)   | Cytoplasm $\hat{\epsilon}^{\circ}$<br>cytosol.<br>Endoplasmic<br>reticulum. Nucleus.                                                                           |
| P03911 | NU4M_MOUSE NADH-<br>ubiquinone oxidoreductase<br>chain 4 OS=Mus musculus<br>GN=Mtnd4 PE=1 SV=1                                      | 8.6E-07 | 20.2  | 5.2  | 2 (2 0 0 0<br>0)   | Mitochondrion<br>membrane; Multi-<br>pass membrane<br>protein.                                                                                                 |
| P03921 | NU5M_MOUSE NADH-<br>ubiquinone oxidoreductase<br>chain 5 OS=Mus musculus<br>GN=Mtnd5 PE=2 SV=2                                      | 8.9E-07 | 20.2  | 2.8  | 3 (3 0 0 0<br>0)   | Mitochondrion<br>inner membrane;<br>Multi-pass<br>membrane protein.                                                                                            |

*A novel role of mitochondria in muscle injury*

|        |                                                                                                                                                               |         |       |      |                   |                                                    |
|--------|---------------------------------------------------------------------------------------------------------------------------------------------------------------|---------|-------|------|-------------------|----------------------------------------------------|
| A2AAJ9 | OBSCN_MOUSE Obscurin OS=Mus musculus GN=Obscn PE=2 SV=2                                                                                                       | 9.2E-09 | 60.3  | 0.9  | 9 (9 0 0 0 0)     | ND                                                 |
| P53395 | ODB2_MOUSE Lipoamide acyltransferase component of branched-chain alpha-keto acid dehydrogenase complex, mitochondrial OS=Mus musculus GN=Dbt PE=2 SV=1        | 4.6E-09 | 20.2  | 5.8  | 2 (2 0 0 0 0)     | Mitochondrion matrix.                              |
| Q60597 | ODO1_MOUSE 2-oxoglutarate dehydrogenase E1 component, mitochondrial OS=Mus musculus GN=Ogdh PE=1 SV=3                                                         | 1.0E-30 | 328.4 | 32.0 | 115 (114 1 0 0 0) | Mitochondrion matrix.                              |
| Q9D2G2 | ODO2_MOUSE Dihydrolipoyllysine-residue succinyltransferase component of 2-oxoglutarate dehydrogenase complex, mitochondrial OS=Mus musculus GN=Dlst PE=1 SV=1 | 1.3E-14 | 116.3 | 22.5 | 29 (25 4 0 0 0)   | Mitochondrion.                                     |
| Q8BMF4 | ODP2_MOUSE Dihydrolipoyllysine-residue acetyltransferase component of pyruvate dehydrogenase complex, mitochondrial OS=Mus musculus GN=Dlat PE=1 SV=2         | 4.4E-16 | 160.3 | 23.1 | 63 (63 0 0 0 0)   | Mitochondrion matrix.                              |
| P35486 | ODPA_MOUSE Pyruvate dehydrogenase E1 component subunit alpha, somatic form, mitochondrial OS=Mus musculus GN=Pdha1 PE=1 SV=1                                  | 1.4E-10 | 80.2  | 29.0 | 13 (13 0 0 0 0)   | Mitochondrion matrix.                              |
| Q9D051 | ODPB_MOUSE Pyruvate dehydrogenase E1 component subunit beta, mitochondrial OS=Mus musculus GN=Pdhb PE=1 SV=1                                                  | 6.2E-12 | 160.2 | 28.7 | 26 (26 0 0 0 0)   | Mitochondrion matrix.                              |
| Q8BKZ9 | ODPX_MOUSE Pyruvate dehydrogenase protein X component, mitochondrial OS=Mus musculus GN=Pdhx PE=2 SV=1                                                        | 6.4E-12 | 60.2  | 16.8 | 12 (11 1 0 0 0)   | Mitochondrion matrix.                              |
| Q8K010 | OPLA_MOUSE 5-oxoprolinase OS=Mus musculus GN=Oplah PE=2 SV=1                                                                                                  | 3.3E-08 | 20.2  | 2.2  | 2 (2 0 0 0 0)     | ND                                                 |
| O54734 | OST48_MOUSE Dolichyl-diphosphooligosaccharide--protein glycosyltransferase 48 kDa subunit OS=Mus                                                              | 2.5E-08 | 30.2  | 7.5  | 3 (3 0 0 0 0)     | Endoplasmic reticulum membrane; Single-pass type I |



*A novel role of mitochondria in muscle injury*

|        |                                                                                                                    |         |       |      |                 |                                                                               |
|--------|--------------------------------------------------------------------------------------------------------------------|---------|-------|------|-----------------|-------------------------------------------------------------------------------|
|        | musculus GN=Ddost PE=1 SV=1                                                                                        |         |       |      |                 | membrane protein.                                                             |
| Q99JB8 | PACN3_MOUSE Protein kinase C and casein kinase II substrate protein 3 OS=Mus musculus GN=Pacsin3 PE=1 SV=1         | 7.2E-08 | 40.2  | 7.5  | 7 (7 0 0 0 0)   | Cytoplasm. Cell membrane; Peripheral membrane protein; Cytoplasmic side.      |
| Q08642 | PADI2_MOUSE Protein-arginine deiminase type-2 OS=Mus musculus GN=Padi2 PE=1 SV=1                                   | 3.3E-09 | 40.2  | 7.3  | 6 (6 0 0 0 0)   | Cytoplasm.                                                                    |
| Q3TVI8 | PBIP1_MOUSE Pre-B-cell leukemia transcription factor-interacting protein 1 OS=Mus musculus GN=Pbxip1 PE=1 SV=2     | 8.1E-12 | 70.2  | 14.3 | 19 (19 0 0 0 0) | Cytoplasm &° cytoskeleton. Nucleus.                                           |
| Q91ZA3 | PCCA_MOUSE Propionyl-CoA carboxylase alpha chain, mitochondrial OS=Mus musculus GN=Pcca PE=2 SV=2                  | 6.1E-12 | 20.2  | 4.0  | 4 (4 0 0 0 0)   | Mitochondrion matrix.                                                         |
| Q99MN9 | PCCB_MOUSE Propionyl-CoA carboxylase beta chain, mitochondrial OS=Mus musculus GN=Pccb PE=1 SV=1                   | 3.4E-12 | 70.3  | 18.3 | 13 (13 0 0 0 0) | Mitochondrion matrix.                                                         |
| Q9CQF9 | PCYOX_MOUSE Prenylcysteine oxidase OS=Mus musculus GN=Pcyox1 PE=1 SV=1                                             | 1.2E-06 | 30.2  | 5.0  | 3 (3 0 0 0 0)   | Lysosome.                                                                     |
| P27773 | PDIA3_MOUSE Protein disulfide-isomerase A3 OS=Mus musculus GN=Pdia3 PE=1 SV=2                                      | 5.9E-06 | 20.1  | 5.3  | 2 (2 0 0 0 0)   | Endoplasmic reticulum lumen. Melanosome.                                      |
| Q9DBJ1 | PGAM1_MOUSE Phosphoglycerate mutase 1 OS=Mus musculus GN=Pgam1 PE=1 SV=3                                           | 3.0E-08 | 60.2  | 15.0 | 8 (8 0 0 0 0)   | ND                                                                            |
| O70250 | PGAM2_MOUSE Phosphoglycerate mutase 2 OS=Mus musculus GN=Pgam2 PE=1 SV=3                                           | 5.8E-08 | 70.2  | 21.3 | 12 (12 0 0 0 0) | ND                                                                            |
| Q05793 | PGBM_MOUSE Basement membrane-specific heparan sulfate proteoglycan core protein OS=Mus musculus GN=Hspg2 PE=1 SV=1 | 8.8E-08 | 130.2 | 4.2  | 18 (18 0 0 0 0) | Secreted &° extracellular space &° extracellular matrix &° basement membrane. |
| Q9D0F9 | PGM1_MOUSE Phosphoglucomutase-1 OS=Mus musculus GN=Pgm1 PE=1 SV=3                                                  | 9.7E-08 | 40.2  | 7.3  | 5 (5 0 0 0 0)   | Cytoplasm.                                                                    |
| Q8BZF8 | PGM5_MOUSE Phosphoglucomutase-like protein 5 OS=Mus musculus                                                       | 2.6E-10 | 20.3  | 4.6  | 4 (4 0 0 0 0)   | Cell junction &° adherens junction. Cytoplasm &°                              |

*A novel role of mitochondria in muscle injury*

|        |                                                                                                                                     |         |       |      |                    |                                                                                                                 |
|--------|-------------------------------------------------------------------------------------------------------------------------------------|---------|-------|------|--------------------|-----------------------------------------------------------------------------------------------------------------|
|        | GN=Pgm5 PE=1 SV=2                                                                                                                   |         |       |      |                    | cytoskeleton.                                                                                                   |
| P28653 | PGS1_MOUSE Biglycan<br>OS=Mus musculus GN=Bgn<br>PE=2 SV=1                                                                          | 2.2E-15 | 50.3  | 16.0 | 11 (11 0 0<br>0 0) | Secreted $\hat{\epsilon}^{\circ}$<br>extracellular space<br>$\hat{\epsilon}^{\circ}$ extracellular<br>matrix.   |
| P28654 | PGS2_MOUSE Decorin<br>OS=Mus musculus GN=Dcn<br>PE=2 SV=1                                                                           | 9.8E-09 | 80.2  | 26.0 | 15 (15 0 0<br>0 0) | Secreted $\hat{\epsilon}^{\circ}$<br>extracellular space<br>$\hat{\epsilon}^{\circ}$ extracellular<br>matrix.   |
| P67778 | PHB_MOUSE Prohibitin<br>OS=Mus musculus GN=Phb<br>PE=1 SV=1                                                                         | 3.4E-08 | 100.2 | 30.1 | 13 (13 0 0<br>0 0) | Mitochondrion<br>inner membrane.                                                                                |
| O35129 | PHB2_MOUSE Prohibitin-2<br>OS=Mus musculus GN=Phb2<br>PE=1 SV=1                                                                     | 5.7E-13 | 100.3 | 37.1 | 16 (16 0 0<br>0 0) | Mitochondrion<br>inner membrane.<br>Cytoplasm.<br>Nucleus.                                                      |
| P07934 | PHKG1_MOUSE<br>Phosphorylase b kinase<br>gamma catalytic chain,<br>skeletal muscle isoform<br>OS=Mus musculus<br>GN=Phkg1 PE=2 SV=3 | 9.9E-06 | 30.1  | 7.7  | 3 (3 0 0 0<br>0)   | ND                                                                                                              |
| Q6PD26 | PIGS_MOUSE GPI<br>transamidase component<br>PIG-S OS=Mus musculus<br>GN=Pigs PE=1 SV=3                                              | 3.2E-13 | 20.3  | 6.8  | 4 (4 0 0 0<br>0)   | Endoplasmic<br>reticulum<br>membrane; Multi-<br>pass membrane<br>protein.                                       |
| Q9QXS1 | PLEC1_MOUSE Plectin-1<br>OS=Mus musculus<br>GN=Plec1 PE=1 SV=2                                                                      | 4.1E-11 | 248.3 | 6.0  | 39 (38 1 0<br>0 0) | Cytoplasm $\hat{\epsilon}^{\circ}$<br>cytoskeleton. Cell<br>junction $\hat{\epsilon}^{\circ}$<br>hemidesmosome. |
| P24369 | PPIB_MOUSE Peptidyl-<br>prolyl cis-trans isomerase B<br>OS=Mus musculus GN=Ppib<br>PE=2 SV=2                                        | 2.6E-05 | 30.2  | 10.2 | 3 (3 0 0 0<br>0)   | Endoplasmic<br>reticulum lumen.<br>Melanosome.                                                                  |
| P35700 | PRDX1_MOUSE<br>Peroxiredoxin-1 OS=Mus<br>musculus GN=Prdx1 PE=1<br>SV=1                                                             | 5.2E-07 | 28.1  | 14.6 | 4 (2 2 0 0<br>0)   | Cytoplasm.<br>Melanosome.                                                                                       |
| Q61171 | PRDX2_MOUSE<br>Peroxiredoxin-2 OS=Mus<br>musculus GN=Prdx2 PE=1<br>SV=3                                                             | 3.3E-05 | 20.1  |      | 3 (3 0 0 0<br>0)   | Cytoplasm.                                                                                                      |
| Q9JK53 | PRELP_MOUSE Prolargin<br>OS=Mus musculus<br>GN=Prelp PE=2 SV=2                                                                      | 1.0E-07 | 50.2  | 14.3 | 16 (16 0 0<br>0 0) | Secreted $\hat{\epsilon}^{\circ}$<br>extracellular space<br>$\hat{\epsilon}^{\circ}$ extracellular<br>matrix.   |
| Q9D7G0 | PRPS1_MOUSE Ribose-<br>phosphate<br>pyrophosphokinase 1<br>OS=Mus musculus<br>GN=Prps1 PE=1 SV=3                                    | 1.4E-07 | 20.2  | 8.8  | 2 (2 0 0 0<br>0)   | ND                                                                                                              |
| P62334 | PRS10_MOUSE 26S<br>protease regulatory subunit                                                                                      | 4.4E-10 | 50.2  | 18.8 | 6 (6 0 0 0<br>0)   | Cytoplasm.<br>Nucleus.                                                                                          |

|            |                                                                                                            |         |      |      |                    |                                   |
|------------|------------------------------------------------------------------------------------------------------------|---------|------|------|--------------------|-----------------------------------|
|            | S10B OS=Mus musculus<br>GN=Psmc6 PE=1 SV=1                                                                 |         |      |      |                    |                                   |
| P62192     | PRS4_MOUSE 26S protease<br>regulatory subunit 4 OS=Mus<br>musculus GN=Psmc1 PE=1<br>SV=1                   | 1.8E-08 | 40.2 | 10.5 | 6 (6 0 0 0<br>0)   | Cytoplasm.<br>Nucleus.            |
| O88685     | PRS6A_MOUSE 26S<br>protease regulatory subunit<br>6A OS=Mus musculus<br>GN=Psmc3 PE=2 SV=1                 | 7.4E-12 | 68.3 | 17.2 | 9 (8 1 0 0<br>0)   | Cytoplasm.<br>Nucleus.            |
| P54775     | PRS6B_MOUSE 26S<br>protease regulatory subunit<br>6B OS=Mus musculus<br>GN=Psmc4 PE=1 SV=1                 | 1.1E-12 | 50.3 | 17.7 | 13 (13 0 0<br>0 0) | Cytoplasm.<br>Nucleus.            |
| P46471     | PRS7_MOUSE 26S protease<br>regulatory subunit 7 OS=Mus<br>musculus GN=Psmc2 PE=1<br>SV=5                   | 4.0E-11 | 50.3 | 16.6 | 6 (6 0 0 0<br>0)   | Cytoplasm.<br>Nucleus.            |
| P62196     | PRS8_MOUSE 26S protease<br>regulatory subunit 8 OS=Mus<br>musculus GN=Psmc5 PE=1<br>SV=1                   | 1.7E-11 | 50.2 | 15.3 | 6 (6 0 0 0<br>0)   | Cytoplasm.<br>Nucleus.            |
| Q11011     | PSA_MOUSE Puromycin-<br>sensitive aminopeptidase<br>OS=Mus musculus<br>GN=Npepps PE=1 SV=1                 | 3.7E-07 | 30.2 | 3.9  | 6 (6 0 0 0<br>0)   | Cytoplasm &°<br>cytosol. Nucleus. |
| Q9R1P0     | PSA4_MOUSE Proteasome<br>subunit alpha type-4<br>OS=Mus musculus<br>GN=Psm4 PE=1 SV=1                      | 6.3E-07 | 20.2 | 6.9  | 2 (2 0 0 0<br>0)   | Cytoplasm.<br>Nucleus.            |
| Q9Z2U0     | PSA7_MOUSE Proteasome<br>subunit alpha type-7<br>OS=Mus musculus<br>GN=Psm7 PE=1 SV=1                      | 5.2E-06 | 20.1 |      | 2 (2 0 0 0<br>0)   | Cytoplasm.<br>Nucleus.            |
| Q9CWH<br>6 | PSA7L_MOUSE Proteasome<br>subunit alpha type-7-like<br>OS=Mus musculus<br>GN=Psm8 PE=2 SV=1                | 5.0E-10 | 20.2 | 10.0 | 3 (3 0 0 0<br>0)   | Cytoplasm.<br>Nucleus.            |
| O09061     | PSB1_MOUSE Proteasome<br>subunit beta type-1 OS=Mus<br>musculus GN=Psm1 PE=1<br>SV=1                       | 2.6E-10 | 20.2 | 11.7 | 3 (3 0 0 0<br>0)   | Cytoplasm.<br>Nucleus.            |
| O55234     | PSB5_MOUSE Proteasome<br>subunit beta type-5 OS=Mus<br>musculus GN=Psm5 PE=1<br>SV=3                       | 2.1E-07 | 60.2 | 17.4 | 6 (6 0 0 0<br>0)   | Cytoplasm.<br>Nucleus.            |
| Q60692     | PSB6_MOUSE Proteasome<br>subunit beta type-6 OS=Mus<br>musculus GN=Psm6 PE=1<br>SV=3                       | 2.4E-07 | 20.1 |      | 2 (2 0 0 0<br>0)   | Cytoplasm.<br>Nucleus.            |
| Q8BG32     | PSD11_MOUSE 26S<br>proteasome non-ATPase<br>regulatory subunit 11<br>OS=Mus musculus<br>GN=Psm11 PE=1 SV=3 | 2.2E-06 | 70.2 | 20.6 | 10 (10 0 0<br>0 0) | ND                                |

|        |                                                                                                |         |       |      |                  |                                                                                                                                                   |
|--------|------------------------------------------------------------------------------------------------|---------|-------|------|------------------|---------------------------------------------------------------------------------------------------------------------------------------------------|
| Q9D8W5 | PSD12_MOUSE 26S proteasome non-ATPase regulatory subunit 12 OS=Mus musculus GN=Psm12 PE=2 SV=3 | 6.7E-15 | 40.2  | 9.9  | 6 (6 0 0 0 0)    | ND                                                                                                                                                |
| Q9WVJ2 | PSD13_MOUSE 26S proteasome non-ATPase regulatory subunit 13 OS=Mus musculus GN=Psm13 PE=1 SV=1 | 4.9E-06 | 20.2  | 8.0  | 2 (2 0 0 0 0)    | ND                                                                                                                                                |
| P26516 | PSD7_MOUSE 26S proteasome non-ATPase regulatory subunit 7 OS=Mus musculus GN=Psm7 PE=1 SV=2    | 1.9E-09 | 20.2  | 7.5  | 2 (2 0 0 0 0)    | ND                                                                                                                                                |
| O35593 | PSDE_MOUSE 26S proteasome non-ATPase regulatory subunit 14 OS=Mus musculus GN=Psm14 PE=1 SV=2  | 2.3E-09 | 20.2  | 12.6 | 2 (2 0 0 0 0)    | ND                                                                                                                                                |
| Q8VDM4 | PSMD2_MOUSE 26S proteasome non-ATPase regulatory subunit 2 OS=Mus musculus GN=Psm2 PE=1 SV=1   | 2.2E-08 | 60.2  | 7.6  | 9 (9 0 0 0 0)    | ND                                                                                                                                                |
| P14685 | PSMD3_MOUSE 26S proteasome non-ATPase regulatory subunit 3 OS=Mus musculus GN=Psm3 PE=2 SV=2   | 1.0E-11 | 70.3  | 14.9 | 11 (11 0 0 0 0)  | ND                                                                                                                                                |
| O54724 | PTRF_MOUSE Polymerase I and transcript release factor OS=Mus musculus GN=Ptrf PE=1 SV=1        | 4.4E-15 | 110.3 | 32.4 | 22 (22 0 0 0 0)  | Membrane $\hat{c}^{\circ}$ caveola. Cell membrane. Microsome. Endoplasmic reticulum. Cytoplasm $\hat{c}^{\circ}$ cytosol. Mitochondrion. Nucleus. |
| Q9DCL9 | PUR6_MOUSE Multifunctional protein ADE2 OS=Mus musculus GN=Paics PE=1 SV=3                     | 1.7E-11 | 20.2  | 5.9  | 3 (3 0 0 0 0)    | ND                                                                                                                                                |
| P54822 | PUR8_MOUSE Adenylosuccinate lyase OS=Mus musculus GN=Adsl PE=2 SV=1                            | 3.3E-15 | 110.3 | 28.5 | 17 (17 0 0 0 0)  | ND                                                                                                                                                |
| P28650 | PURA1_MOUSE Adenylosuccinate synthetase isozyme 1 OS=Mus musculus GN=Adss11 PE=1 SV=2          | 1.4E-13 | 40.3  | 12.5 | 9 (9 0 0 0 0)    | Cytoplasm. Membrane; Peripheral membrane protein.                                                                                                 |
| Q8CI94 | PYGB_MOUSE Glycogen phosphorylase, brain form                                                  | 4.0E-11 | 76.3  | 7.7  | 55 (36 19 0 0 0) | ND                                                                                                                                                |

*A novel role of mitochondria in muscle injury*

|        |                                                                                                      |         |       |      |                    |                                                                                                                                                                                |
|--------|------------------------------------------------------------------------------------------------------|---------|-------|------|--------------------|--------------------------------------------------------------------------------------------------------------------------------------------------------------------------------|
|        | OS=Mus musculus GN=Pygb<br>PE=1 SV=3                                                                 |         |       |      |                    |                                                                                                                                                                                |
| Q9ET01 | PYGL_MOUSE Glycogen phosphorylase, liver form<br>OS=Mus musculus GN=Pygl<br>PE=1 SV=3                | 3.0E-09 | 20.2  | 2.0  | 13 (13 0 0 0 0)    | ND                                                                                                                                                                             |
| Q9WUB3 | PYGM_MOUSE Glycogen phosphorylase, muscle form<br>OS=Mus musculus GN=Pygm<br>PE=1 SV=3               | 4.4E-16 | 418.3 | 38.2 | 362 (351 11 0 0 0) | ND                                                                                                                                                                             |
| Q9CZ13 | QCR1_MOUSE Cytochrome b-c1 complex subunit 1, mitochondrial<br>OS=Mus musculus GN=Uqrc1<br>PE=1 SV=1 | 1.0E-30 | 244.4 | 41.5 | 59 (56 3 0 0 0)    | Mitochondrion inner membrane.                                                                                                                                                  |
| Q9DB77 | QCR2_MOUSE Cytochrome b-c1 complex subunit 2, mitochondrial<br>OS=Mus musculus GN=Uqrc2<br>PE=1 SV=1 | 1.3E-14 | 180.3 | 40.0 | 49 (49 0 0 0 0)    | Mitochondrion inner membrane; Peripheral membrane protein; Matrix side.                                                                                                        |
| P61027 | RAB10_MOUSE Ras-related protein Rab-10<br>OS=Mus musculus GN=Rab10<br>PE=1 SV=1                      | 2.8E-08 | 20.2  | 11.5 | 2 (2 0 0 0 0)      | Cell membrane; Lipid-anchor; Cytoplasmic side.                                                                                                                                 |
| P53994 | RAB2A_MOUSE Ras-related protein Rab-2A<br>OS=Mus musculus GN=Rab2a<br>PE=1 SV=1                      | 1.0E-08 | 20.2  | 11.8 | 2 (2 0 0 0 0)      | Endoplasmic reticulum-Golgi intermediate compartment membrane; Lipid-anchor. Melanosome. Endoplasmic reticulum membrane; Lipid-anchor. Golgi apparatus membrane; Lipid-anchor. |
| P26043 | RADI_MOUSE Radixin<br>OS=Mus musculus GN=Rdx<br>PE=1 SV=2                                            | 2.8E-07 | 50.2  | 10.8 | 6 (6 0 0 0 0)      | Cell membrane; Peripheral membrane protein; Cytoplasmic side. Cytoplasmic cytoskeleton. Cleavage furrow.                                                                       |
| P47963 | RL13_MOUSE 60S ribosomal protein L13<br>OS=Mus musculus GN=Rpl13<br>PE=2 SV=3                        | 3.2E-08 | 40.2  | 16.1 | 5 (5 0 0 0 0)      | ND                                                                                                                                                                             |
| P84099 | RL19_MOUSE 60S ribosomal protein L19<br>OS=Mus musculus GN=Rpl19<br>PE=1 SV=1                        | 6.9E-05 | 20.2  |      | 4 (4 0 0 0 0)      | ND                                                                                                                                                                             |
| P62751 | RL23A_MOUSE 60S ribosomal protein L23a                                                               | 9.8E-09 | 20.2  | 16.0 | 2 (2 0 0 0 0)      | ND                                                                                                                                                                             |

|        |                                                                                                                                     |         |      |      |                    |                                                                                                  |
|--------|-------------------------------------------------------------------------------------------------------------------------------------|---------|------|------|--------------------|--------------------------------------------------------------------------------------------------|
|        | OS=Mus musculus<br>GN=Rpl23a PE=1 SV=1                                                                                              |         |      |      |                    |                                                                                                  |
| Q8BP67 | RL24_MOUSE 60S<br>ribosomal protein L24<br>OS=Mus musculus<br>GN=Rpl24 PE=2 SV=2                                                    | 4.2E-08 | 20.2 | 8.3  | 2 (2 0 0 0<br>0)   | ND                                                                                               |
| P61255 | RL26_MOUSE 60S<br>ribosomal protein L26<br>OS=Mus musculus<br>GN=Rpl26 PE=2 SV=1                                                    | 7.5E-07 | 30.2 | 17.2 | 3 (3 0 0 0<br>0)   | ND                                                                                               |
| P14148 | RL7_MOUSE 60S ribosomal<br>protein L7 OS=Mus<br>musculus GN=Rpl7 PE=2<br>SV=2                                                       | 7.2E-08 | 30.2 | 9.3  | 3 (3 0 0 0<br>0)   | ND                                                                                               |
| Q91YQ5 | RPN1_MOUSE Dolichyl-<br>diphosphooligosaccharide--<br>protein glycosyltransferase<br>subunit 1 OS=Mus musculus<br>GN=Rpn1 PE=2 SV=1 | 9.9E-09 | 90.2 | 18.3 | 12 (12 0 0<br>0 0) | Endoplasmic<br>reticulum<br>membrane; Single-<br>pass type I<br>membrane protein.<br>Melanosome. |
| Q9DBG6 | RPN2_MOUSE Dolichyl-<br>diphosphooligosaccharide--<br>protein glycosyltransferase<br>subunit 2 OS=Mus musculus<br>GN=Rpn2 PE=2 SV=1 | 3.3E-16 | 70.4 | 17.9 | 9 (9 0 0 0<br>0)   | Endoplasmic<br>reticulum<br>membrane; Multi-<br>pass membrane<br>protein.                        |
| P62264 | RS14_MOUSE 40S<br>ribosomal protein S14<br>OS=Mus musculus<br>GN=Rps14 PE=2 SV=3                                                    | 2.0E-07 | 20.2 | 15.9 | 3 (3 0 0 0<br>0)   | ND                                                                                               |
| P62908 | RS3_MOUSE 40S ribosomal<br>protein S3 OS=Mus<br>musculus GN=Rps3 PE=1<br>SV=1                                                       | 1.1E-06 | 30.1 | 12.8 | 5 (5 0 0 0<br>0)   | Cytoplasm.                                                                                       |
| P97351 | RS3A_MOUSE 40S<br>ribosomal protein S3a<br>OS=Mus musculus<br>GN=Rps3a PE=1 SV=3                                                    | 4.1E-06 | 50.2 | 15.5 | 5 (5 0 0 0<br>0)   | Cytoplasm.<br>Nucleus.                                                                           |
| P62702 | RS4X_MOUSE 40S<br>ribosomal protein S4, X<br>isoform OS=Mus musculus<br>GN=Rps4x PE=2 SV=2                                          | 8.5E-06 | 40.1 | 15.2 | 4 (4 0 0 0<br>0)   | Cytoplasm.                                                                                       |
| P62754 | RS6_MOUSE 40S ribosomal<br>protein S6 OS=Mus<br>musculus GN=Rps6 PE=1<br>SV=1                                                       | 5.4E-09 | 20.1 |      | 4 (4 0 0 0<br>0)   | ND                                                                                               |
| P62242 | RS8_MOUSE 40S ribosomal<br>protein S8 OS=Mus<br>musculus GN=Rps8 PE=1<br>SV=2                                                       | 9.3E-09 | 30.2 | 18.8 | 3 (3 0 0 0<br>0)   | Cytoplasm.                                                                                       |
| Q6ZWN5 | RS9_MOUSE 40S ribosomal<br>protein S9 OS=Mus<br>musculus GN=Rps9 PE=2<br>SV=3                                                       | 1.6E-05 | 20.2 | 10.3 | 3 (3 0 0 0<br>0)   | Cytoplasm.                                                                                       |
| O70622 | RTN2_MOUSE Reticulon-2<br>OS=Mus musculus GN=Rtn2                                                                                   | 7.8E-13 | 40.3 | 11.7 | 48 (48 0 0<br>0 0) | Endoplasmic<br>reticulum                                                                         |

*A novel role of mitochondria in muscle injury*

|        |                                                                                                                |         |      |      |                    |                                                                                                                                                                                                                                                                                                      |
|--------|----------------------------------------------------------------------------------------------------------------|---------|------|------|--------------------|------------------------------------------------------------------------------------------------------------------------------------------------------------------------------------------------------------------------------------------------------------------------------------------------------|
|        | PE=1 SV=1                                                                                                      |         |      |      |                    | membrane; Single-pass membrane protein.                                                                                                                                                                                                                                                              |
| Q99P72 | RTN4_MOUSE Reticulon-4<br>OS=Mus musculus GN=Rtn4<br>PE=1 SV=2                                                 | 3.8E-11 | 20.2 | 2.4  | 2 (2 0 0 0<br>0)   | Endoplasmic reticulum membrane; Multi-pass membrane protein.                                                                                                                                                                                                                                         |
| Q9EP69 | SAC1_MOUSE<br>Phosphatidylinositide phosphatase SAC1 OS=Mus musculus GN=Sacm11 PE=2 SV=1                       | 4.1E-07 | 20.2 | 3.4  | 3 (3 0 0 0<br>0)   | Endoplasmic reticulum membrane; Multi-pass membrane protein.                                                                                                                                                                                                                                         |
| Q8BGH2 | SAM50_MOUSE Sorting and assembly machinery component 50 homolog OS=Mus musculus GN=Sam50 PE=1 SV=1             | 2.4E-09 | 40.2 | 10.7 | 4 (4 0 0 0<br>0)   | Mitochondrion outer membrane; Multi-pass membrane protein. Cytoplasm.                                                                                                                                                                                                                                |
| Q01405 | SC23A_MOUSE Protein transport protein Sec23A OS=Mus musculus GN=Sec23a PE=1 SV=2                               | 5.2E-09 | 20.2 | 3.3  | 2 (2 0 0 0<br>0)   | Smooth endoplasmic reticulum membrane; Peripheral membrane protein. Golgi apparatus membrane; Peripheral membrane protein.                                                                                                                                                                           |
| Q9D0K2 | SCOT1_MOUSE Succinyl-CoA:3-ketoacid-coenzyme A transferase 1, mitochondrial OS=Mus musculus GN=Oxct1 PE=1 SV=1 | 3.1E-09 | 70.3 | 11.0 | 7 (7 0 0 0<br>0)   | Mitochondrion matrix.                                                                                                                                                                                                                                                                                |
| Q63918 | SDPR_MOUSE Serum deprivation-response protein OS=Mus musculus GN=Sdpr PE=1 SV=3                                | 2.1E-09 | 20.2 | 7.2  | 2 (2 0 0 0<br>0)   | Cytoplasm $\hat{\epsilon}^{\circ}$ cytosol. Membrane $\hat{\epsilon}^{\circ}$ caveola.                                                                                                                                                                                                               |
| O55131 | SEPT7_MOUSE Septin-7 OS=Mus musculus GN=Sept7 PE=1 SV=1                                                        | 3.9E-06 | 20.2 | 4.8  | 3 (3 0 0 0<br>0)   | Cytoplasm. Chromosome $\hat{\epsilon}^{\circ}$ centromere $\hat{\epsilon}^{\circ}$ kinetochore. Cytoplasm $\hat{\epsilon}^{\circ}$ cytoskeleton $\hat{\epsilon}^{\circ}$ spindle. Cleavage furrow. Midbody. Cytoplasm $\hat{\epsilon}^{\circ}$ cytoskeleton $\hat{\epsilon}^{\circ}$ cilium axoneme. |
| P19324 | SERPH_MOUSE Serpin H1 OS=Mus musculus GN=Serpinh1 PE=1 SV=2                                                    | 1.4E-12 | 30.2 | 9.8  | 6 (6 0 0 0<br>0)   | Endoplasmic reticulum lumen.                                                                                                                                                                                                                                                                         |
| P82350 | SGCA_MOUSE Alpha-sarcoglycan OS=Mus musculus GN=Sgca PE=1 SV=1                                                 | 2.1E-11 | 40.3 | 12.7 | 13 (13 0 0<br>0 0) | Cell membrane $\hat{\epsilon}^{\circ}$ sarcolemma; Single-pass type I membrane protein.                                                                                                                                                                                                              |

|        |                                                                                                |         |       |      |                   |                                                                                                                                         |
|--------|------------------------------------------------------------------------------------------------|---------|-------|------|-------------------|-----------------------------------------------------------------------------------------------------------------------------------------|
|        |                                                                                                |         |       |      |                   | Cytoplasm &° cytoskeleton.                                                                                                              |
| P82347 | SGCD_MOUSE Delta-sarcoglycan OS=Mus musculus GN=Sgcd PE=1 SV=1                                 | 8.1E-09 | 20.1  |      | 2 (2 0 0 0 0)     | Cell membrane &° sarcolemma; Single-pass type II membrane protein. Cytoplasm &° cytoskeleton.                                           |
| P82348 | SGCG_MOUSE Gamma-sarcoglycan OS=Mus musculus GN=Sgcg PE=1 SV=2                                 | 1.9E-10 | 20.2  | 11.3 | 4 (4 0 0 0 0)     | Cell membrane &° sarcolemma; Single-pass type II membrane protein. Cytoplasm &° cytoskeleton.                                           |
| P97443 | SMYD1_MOUSE SET and MYND domain-containing protein 1 OS=Mus musculus GN=Smyd1 PE=1 SV=2        | 4.2E-11 | 100.2 | 25.6 | 20 (20 0 0 0 0)   | Cytoplasm. Nucleus.                                                                                                                     |
| Q61234 | SNTA1_MOUSE Alpha-1-syntrophin OS=Mus musculus GN=Snta1 PE=1 SV=1                              | 5.7E-14 | 20.3  | 5.6  | 2 (2 0 0 0 0)     | Cell membrane &° sarcolemma; Peripheral membrane protein; Cytoplasmic side. Cell junction. Cytoplasm &° cytoskeleton.                   |
| Q60854 | SPB6_MOUSE Serpin B6 OS=Mus musculus GN=Serpinb6 PE=2 SV=1                                     | 8.8E-06 | 20.1  | 4.8  | 2 (2 0 0 0 0)     | Cytoplasm.                                                                                                                              |
| P16546 | SPTA2_MOUSE Spectrin alpha chain, brain OS=Mus musculus GN=Sptan1 PE=1 SV=4                    | 1.6E-14 | 60.3  | 5.3  | 11 (11 0 0 0 0)   | Cytoplasm &° cytoskeleton. Cytoplasm &° cell cortex.                                                                                    |
| Q62261 | SPTB2_MOUSE Spectrin beta chain, brain 1 OS=Mus musculus GN=Sptbn1 PE=1 SV=2                   | 7.1E-10 | 20.2  | 1.3  | 2 (2 0 0 0 0)     | Cytoplasm &° cytoskeleton. Cytoplasm &° myofibril &° sarcomere &° M line. Cell membrane; Peripheral membrane protein; Cytoplasmic side. |
| Q7TQ48 | SRCA_MOUSE Sarcalumenin OS=Mus musculus GN=Srl PE=1 SV=1                                       | 1.0E-30 | 330.3 | 33.2 | 128 (128 0 0 0 0) | Sarcoplasmic reticulum lumen.                                                                                                           |
| O35400 | ST2B1_MOUSE Sulfotransferase family cytosolic 2B member 1 OS=Mus musculus GN=Sult2b1 PE=2 SV=2 | 8.1E-04 | 20.1  | 5.0  | 2 (2 0 0 0 0)     | Cytoplasm.                                                                                                                              |
| P70302 | STIM1_MOUSE Stromal interaction molecule 1                                                     | 5.0E-06 | 50.2  | 5.3  | 5 (5 0 0 0 0)     | Cell membrane; Single-pass type I                                                                                                       |



*A novel role of mitochondria in muscle injury*

|            |                                                                                                                            |         |       |      |                    |                                                                                                                                         |
|------------|----------------------------------------------------------------------------------------------------------------------------|---------|-------|------|--------------------|-----------------------------------------------------------------------------------------------------------------------------------------|
|            | OS=Mus musculus<br>GN=Stim1 PE=1 SV=1                                                                                      |         |       |      |                    | membrane protein.<br>Endoplasmic<br>reticulum<br>membrane; Single-<br>pass type I<br>membrane protein.<br>Cytoplasm &°<br>cytoskeleton. |
| Q60864     | STIP1_MOUSE Stress-<br>induced-phosphoprotein 1<br>OS=Mus musculus<br>GN=Stip1 PE=1 SV=1                                   | 1.7E-08 | 60.2  | 13.6 | 6 (6 0 0 0<br>0)   | Cytoplasm.<br>Nucleus.                                                                                                                  |
| Q9WUM<br>5 | SUCA_MOUSE Succinyl-<br>CoA ligase [GDP-forming]<br>subunit alpha, mitochondrial<br>OS=Mus musculus<br>GN=Suclg1 PE=1 SV=4 | 5.9E-09 | 50.2  | 11.8 | 5 (5 0 0 0<br>0)   | Mitochondrion.                                                                                                                          |
| Q9Z2I9     | SUCB1_MOUSE Succinyl-<br>CoA ligase [ADP-forming]<br>subunit beta, mitochondrial<br>OS=Mus musculus<br>GN=Sucla2 PE=1 SV=2 | 1.1E-06 | 60.2  | 17.1 | 8 (8 0 0 0<br>0)   | Mitochondrion.                                                                                                                          |
| Q8R086     | SUOX_MOUSE Sulfite<br>oxidase, mitochondrial<br>OS=Mus musculus GN=Suox<br>PE=1 SV=2                                       | 4.7E-11 | 30.3  | 11.7 | 4 (4 0 0 0<br>0)   | Mitochondrion<br>intermembrane<br>space.                                                                                                |
| Q922B2     | SYDC_MOUSE Aspartyl-<br>tRNA synthetase,<br>cytoplasmic OS=Mus<br>musculus GN=Dars PE=2<br>SV=1                            | 4.9E-12 | 130.2 | 26.7 | 21 (21 0 0<br>0 0) | Cytoplasm.                                                                                                                              |
| Q8CGC7     | SYEP_MOUSE Bifunctional<br>aminoacyl-tRNA synthetase<br>OS=Mus musculus GN=Eprs<br>PE=2 SV=3                               | 4.7E-12 | 220.3 | 22.2 | 34 (34 0 0<br>0 0) | ND                                                                                                                                      |
| Q9CZD3     | SYG_MOUSE Glycyl-tRNA<br>synthetase OS=Mus<br>musculus GN=Gars PE=1<br>SV=1                                                | 1.0E-09 | 20.2  | 3.3  | 2 (2 0 0 0<br>0)   | Cytoplasm.<br>Mitochondrion.                                                                                                            |
| Q8BU30     | SYIC_MOUSE Isoleucyl-<br>tRNA synthetase,<br>cytoplasmic OS=Mus<br>musculus GN=Iars PE=2<br>SV=1                           | 2.7E-13 | 110.3 | 11.3 | 16 (16 0 0<br>0 0) | Cytoplasm.                                                                                                                              |
| O89104     | SYPL2_MOUSE<br>Synaptophysin-like protein 2<br>OS=Mus musculus<br>GN=Sypl2 PE=2 SV=1                                       | 1.6E-05 | 20.1  | 8.7  | 2 (2 0 0 0<br>0)   | Membrane; Multi-<br>pass membrane<br>protein.                                                                                           |
| Q9D0I9     | SYRC_MOUSE Arginyl-<br>tRNA synthetase,<br>cytoplasmic OS=Mus<br>musculus GN=Rars PE=2<br>SV=2                             | 1.5E-11 | 130.2 | 22.1 | 13 (13 0 0<br>0 0) | Cytoplasm.                                                                                                                              |
| Q9D0R2     | SYTC_MOUSE Threonyl-<br>tRNA synthetase,                                                                                   | 5.0E-07 | 20.2  | 3.5  | 3 (3 0 0 0<br>0)   | Cytoplasm.                                                                                                                              |

*A novel role of mitochondria in muscle injury*

|        |                                                                                                  |         |       |      |                 |                                                                   |
|--------|--------------------------------------------------------------------------------------------------|---------|-------|------|-----------------|-------------------------------------------------------------------|
|        | cytoplasmic OS=Mus musculus GN=Tars PE=1 SV=2                                                    |         |       |      |                 |                                                                   |
| Q8BLY2 | SYTC2_MOUSE Probable threonyl-tRNA synthetase 2, cytoplasmic OS=Mus musculus GN=Tarsl2 PE=2 SV=1 | 1.3E-05 | 40.2  | 4.9  | 6 (6 0 0 0 0)   | Cytoplasm.                                                        |
| Q9Z1Q9 | SYVC_MOUSE Valyl-tRNA synthetase OS=Mus musculus GN=Vars PE=2 SV=1                               | 1.0E-30 | 110.4 | 12.7 | 16 (16 0 0 0 0) | ND                                                                |
| P68369 | TBA1A_MOUSE Tubulin alpha-1A chain OS=Mus musculus GN=Tuba1a PE=1 SV=1                           | 3.3E-13 | 110.3 | 37.5 | 38 (38 0 0 0 0) | Cytoplasm â€° cytoskeleton.                                       |
| P68368 | TBA4A_MOUSE Tubulin alpha-4A chain OS=Mus musculus GN=Tuba4a PE=1 SV=1                           | 4.8E-10 | 30.2  | 6.7  | 15 (15 0 0 0 0) | Cytoplasm â€° cytoskeleton.                                       |
| Q7TMM9 | TBB2A_MOUSE Tubulin beta-2A chain OS=Mus musculus GN=Tubb2a PE=1 SV=1                            | 1.7E-06 | 20.2  | 2.2  | 3 (3 0 0 0 0)   | Cytoplasm â€° cytoskeleton.                                       |
| Q7TMM9 | TBB2A_MOUSE Tubulin beta-2A chain OS=Mus musculus GN=Tubb2a PE=1 SV=1                            | 2.5E-13 | 148.3 | 26.7 | 69 (68 1 0 0 0) | Cytoplasm â€° cytoskeleton.                                       |
| P68372 | TBB2C_MOUSE Tubulin beta-2C chain OS=Mus musculus GN=Tubb2c PE=1 SV=1                            | 2.3E-12 | 80.2  | 12.1 | 33 (33 0 0 0 0) | Cytoplasm â€° cytoskeleton.                                       |
| P11984 | TCPA1_MOUSE T-complex protein 1 subunit alpha A OS=Mus musculus GN=Tcp1 PE=1 SV=2                | 8.9E-15 | 140.3 | 22.8 | 21 (21 0 0 0 0) | ND                                                                |
| P11983 | TCPA2_MOUSE T-complex protein 1 subunit alpha B OS=Mus musculus GN=Tcp1 PE=1 SV=3                | 2.1E-09 | 30.2  | 6.3  | 4 (4 0 0 0 0)   | Cytoplasm. Cytoplasm â€° cytoskeleton â€° centrosome.             |
| P80314 | TCPB_MOUSE T-complex protein 1 subunit beta OS=Mus musculus GN=Cct2 PE=1 SV=4                    | 2.6E-14 | 220.3 | 49.9 | 37 (37 0 0 0 0) | Cytoplasm.                                                        |
| P80315 | TCPD_MOUSE T-complex protein 1 subunit delta OS=Mus musculus GN=Cct4 PE=1 SV=3                   | 3.6E-11 | 120.2 | 22.6 | 15 (15 0 0 0 0) | Cytoplasm. Melanosome. Cytoplasm â€° cytoskeleton â€° centrosome. |
| P80316 | TCPE_MOUSE T-complex protein 1 subunit epsilon OS=Mus musculus GN=Cct5 PE=1 SV=1                 | 1.0E-14 | 146.3 | 30.3 | 25 (21 3 1 0 0) | Cytoplasm. Cytoplasm â€° cytoskeleton â€° centrosome.             |
| P80318 | TCPG_MOUSE T-complex protein 1 subunit gamma                                                     | 1.0E-14 | 194.3 | 32.8 | 27 (25 1 1 0 0) | Cytoplasm.                                                        |

*A novel role of mitochondria in muscle injury*

|        |                                                                                                          |         |        |      |                         |                                                                                                                                               |
|--------|----------------------------------------------------------------------------------------------------------|---------|--------|------|-------------------------|-----------------------------------------------------------------------------------------------------------------------------------------------|
|        | OS=Mus musculus GN=Cct3<br>PE=1 SV=1                                                                     |         |        |      |                         |                                                                                                                                               |
| P80313 | TCPH_MOUSE T-complex<br>protein 1 subunit eta<br>OS=Mus musculus GN=Cct7<br>PE=1 SV=1                    | 8.9E-15 | 110.3  | 22.4 | 15 (15 0 0<br>0 0)      | Cytoplasm.                                                                                                                                    |
| P42932 | TCPQ_MOUSE T-complex<br>protein 1 subunit theta<br>OS=Mus musculus GN=Cct8<br>PE=1 SV=3                  | 3.7E-10 | 130.2  | 19.5 | 22 (22 0 0<br>0 0)      | Cytoplasm.<br>Cytoplasm $\hat{c}$<br>cytoskeleton $\hat{c}$<br>centrosome.                                                                    |
| Q61390 | TCPW_MOUSE T-complex<br>protein 1 subunit zeta-2<br>OS=Mus musculus<br>GN=Cct6b PE=2 SV=4                | 1.0E-12 | 66.3   | 10.5 | 12 (8 4 0 0<br>0)       | Cytoplasm.                                                                                                                                    |
| P80317 | TCPZ_MOUSE T-complex<br>protein 1 subunit zeta<br>OS=Mus musculus<br>GN=Cct6a PE=1 SV=3                  | 3.5E-13 | 100.3  | 23.9 | 15 (15 0 0<br>0 0)      | Cytoplasm.                                                                                                                                    |
| Q9CY27 | TECR_MOUSE Trans-2,3-<br>enoyl-CoA reductase<br>OS=Mus musculus GN=Tecr<br>PE=1 SV=1                     | 6.9E-10 | 20.2   | 6.8  | 3 (3 0 0 0<br>0)        | Endoplasmic<br>reticulum<br>membrane; Multi-<br>pass membrane<br>protein.                                                                     |
| Q01853 | TERA_MOUSE Transitional<br>endoplasmic reticulum<br>ATPase OS=Mus musculus<br>GN=Vcp PE=1 SV=4           | 3.2E-13 | 160.3  | 24.3 | 27 (27 0 0<br>0 0)      | Cytoplasm $\hat{c}$<br>cytosol. Nucleus.                                                                                                      |
| P21981 | TGM2_MOUSE Protein-<br>glutamine gamma-<br>glutamyltransferase 2<br>OS=Mus musculus<br>GN=Tgm2 PE=1 SV=4 | 3.1E-12 | 20.2   | 4.1  | 6 (6 0 0 0<br>0)        | ND                                                                                                                                            |
| Q8QZT1 | THIL_MOUSE Acetyl-CoA<br>acetyltransferase,<br>mitochondrial OS=Mus<br>musculus GN=Acat1 PE=1<br>SV=1    | 1.0E-12 | 50.3   | 20.0 | 8 (8 0 0 0<br>0)        | Mitochondrion.                                                                                                                                |
| Q8BWT1 | THIM_MOUSE 3-ketoacyl-<br>CoA thiolase, mitochondrial<br>OS=Mus musculus<br>GN=Acaa2 PE=1 SV=2           | 5.6E-15 | 130.3  | 37.5 | 31 (31 0 0<br>0 0)      | Mitochondrion.                                                                                                                                |
| A2ASS6 | TITIN_MOUSE Titin<br>OS=Mus musculus GN=Ttn<br>PE=1 SV=1                                                 | 1.0E-30 | 7190.4 | 23.1 | 1881 (1850<br>23 8 0 0) | Cytoplasm.<br>Nucleus.                                                                                                                        |
| P26039 | TLN1_MOUSE Talin-1<br>OS=Mus musculus GN=Tln1<br>PE=1 SV=1                                               | 4.7E-06 | 20.2   | 1.4  | 3 (3 0 0 0<br>0)        | Cell projection $\hat{c}$<br>ruffle membrane;<br>Peripheral<br>membrane protein;<br>Cytoplasmic side.<br>Cytoplasm $\hat{c}$<br>cytoskeleton. |
| Q3TMP8 | TM38A_MOUSE Trimeric<br>intracellular cation channel<br>type A OS=Mus musculus<br>GN=Tmem38a PE=1 SV=2   | 1.9E-09 | 40.3   | 16.1 | 15 (15 0 0<br>0 0)      | Sarcoplasmic<br>reticulum<br>membrane; Multi-<br>pass membrane                                                                                |

|        |                                                                                                           |         |       |      |                 |                                                                                                                                                                                                                            |
|--------|-----------------------------------------------------------------------------------------------------------|---------|-------|------|-----------------|----------------------------------------------------------------------------------------------------------------------------------------------------------------------------------------------------------------------------|
|        |                                                                                                           |         |       |      |                 | protein. Nucleus membrane.                                                                                                                                                                                                 |
| Q9R0Q3 | TMED2_MOUSE<br>Transmembrane emp24 domain-containing protein 2<br>OS=Mus musculus<br>GN=Tmed2 PE=1 SV=1   | 1.5E-04 | 20.1  |      | 2 (2 0 0 0 0)   | Cytoplasmic vesicle membrane; Single-pass type I membrane protein. Cytoplasmic vesicle ° COPI-coated vesicle membrane; Single-pass type I membrane protein. Golgi apparatus membrane; Single-pass type I membrane protein. |
| Q9D1D4 | TMEDA_MOUSE<br>Transmembrane emp24 domain-containing protein 10<br>OS=Mus musculus<br>GN=Tmed10 PE=2 SV=1 | 7.7E-06 | 20.2  | 9.1  | 2 (2 0 0 0 0)   | Golgi apparatus membrane; Single-pass type I membrane protein; Lumenal side. Melanosome.                                                                                                                                   |
| P13412 | TNNI2_MOUSE Troponin I, fast skeletal muscle<br>OS=Mus musculus<br>GN=Tnni2 PE=1 SV=2                     | 2.8E-08 | 20.2  | 13.7 | 2 (2 0 0 0 0)   | ND                                                                                                                                                                                                                         |
| O88346 | TNNT1_MOUSE Troponin T, slow skeletal muscle<br>OS=Mus musculus<br>GN=Tnnt1 PE=2 SV=3                     | 1.8E-07 | 30.2  | 10.7 | 3 (3 0 0 0 0)   | ND                                                                                                                                                                                                                         |
| Q9QZ47 | TNNT3_MOUSE Troponin T, fast skeletal muscle<br>OS=Mus musculus<br>GN=Tnnt3 PE=1 SV=3                     | 1.8E-13 | 100.3 | 29.8 | 35 (35 0 0 0 0) | ND                                                                                                                                                                                                                         |
| P17751 | TPIS_MOUSE<br>Triosephosphate isomerase<br>OS=Mus musculus<br>GN=Tpi1 PE=1 SV=3                           | 2.5E-12 | 100.2 | 38.2 | 40 (40 0 0 0 0) | ND                                                                                                                                                                                                                         |
| P58771 | TPM1_MOUSE<br>Tropomyosin alpha-1 chain<br>OS=Mus musculus<br>GN=Tpm1 PE=1 SV=1                           | 3.8E-13 | 176.2 | 48.9 | 39 (37 2 0 0 0) | Cytoplasm ° cytoskeleton.                                                                                                                                                                                                  |
| P58774 | TPM2_MOUSE<br>Tropomyosin beta chain<br>OS=Mus musculus<br>GN=Tpm2 PE=1 SV=1                              | 2.4E-08 | 90.2  | 29.9 | 13 (13 0 0 0 0) | Cytoplasm ° cytoskeleton.                                                                                                                                                                                                  |
| P21107 | TPM3_MOUSE<br>Tropomyosin alpha-3 chain<br>OS=Mus musculus<br>GN=Tpm3 PE=1 SV=2                           | 6.1E-08 | 30.2  | 14.8 | 3 (3 0 0 0 0)   | Cytoplasm ° cytoskeleton.                                                                                                                                                                                                  |
| Q921I1 | TRFE_MOUSE<br>Serotransferrin<br>OS=Mus musculus<br>GN=Tf PE=1 SV=1                                       | 6.7E-05 | 20.2  | 2.9  | 3 (3 0 0 0 0)   | Secreted.                                                                                                                                                                                                                  |
| Q1XH17 | TRI72_MOUSE Tripartite                                                                                    | 2.2E-16 | 200.3 | 40.5 | 56 (55 1 0)     | Cell membrane °                                                                                                                                                                                                            |

|        |                                                                                                                    |         |       |      |                      |                                                                                                                          |
|--------|--------------------------------------------------------------------------------------------------------------------|---------|-------|------|----------------------|--------------------------------------------------------------------------------------------------------------------------|
|        | motif-containing protein 72<br>OS=Mus musculus<br>GN=Trim72 PE=1 SV=1                                              |         |       |      | 0 0)                 | sarcolemma.<br>Cytoplasmic<br>vesicle membrane.                                                                          |
| Q9JMH6 | TRXR1_MOUSE<br>Thioredoxin reductase 1,<br>cytoplasmic OS=Mus<br>musculus GN=Txnrd1 PE=1<br>SV=3                   | 1.9E-06 | 20.2  | 4.2  | 2 (2 0 0 0<br>0)     | Cytoplasm.                                                                                                               |
| Q9CRD2 | TTC35_MOUSE<br>Tetratricopeptide repeat<br>protein 35 OS=Mus<br>musculus GN=Ttc35 PE=2<br>SV=1                     | 3.3E-09 | 20.2  | 7.4  | 2 (2 0 0 0<br>0)     | Nucleus.                                                                                                                 |
| Q02053 | UBA1_MOUSE Ubiquitin-<br>like modifier-activating<br>enzyme 1 OS=Mus musculus<br>GN=Uba1 PE=1 SV=1                 | 1.7E-14 | 50.3  | 8.7  | 12 (12 0 0<br>0 0)   | ND                                                                                                                       |
| P62991 | UBIQ_MOUSE Ubiquitin<br>OS=Mus musculus<br>GN=Rps27a PE=1 SV=1                                                     | 2.4E-07 | 20.2  | 32.9 | 8 (8 0 0 0<br>0)     | ND                                                                                                                       |
| Q9CR68 | UCRI_MOUSE Cytochrome<br>b-c1 complex subunit Rieske,<br>mitochondrial OS=Mus<br>musculus GN=Uqcrfs1 PE=1<br>SV=1  | 1.8E-09 | 50.2  | 33.9 | 14 (14 0 0<br>0 0)   | Mitochondrion<br>inner membrane.                                                                                         |
| Q91ZJ5 | UGPA_MOUSE UTP--<br>glucose-1-phosphate<br>uridylyltransferase OS=Mus<br>musculus GN=Ugp2 PE=2<br>SV=3             | 1.1E-15 | 340.3 | 61.8 | 105 (105 0<br>0 0 0) | Cytoplasm.                                                                                                               |
| Q9WV55 | VAPA_MOUSE Vesicle-<br>associated membrane<br>protein-associated protein A<br>OS=Mus musculus<br>GN=Vapa PE=1 SV=2 | 3.5E-08 | 20.2  | 10.4 | 2 (2 0 0 0<br>0)     | Endoplasmic<br>reticulum<br>membrane; Single-<br>pass type IV<br>membrane protein.                                       |
| Q9QY76 | VAPB_MOUSE Vesicle-<br>associated membrane<br>protein-associated protein B<br>OS=Mus musculus<br>GN=Vapb PE=2 SV=3 | 1.5E-07 | 20.2  | 11.1 | 3 (3 0 0 0<br>0)     | Endoplasmic<br>reticulum<br>membrane; Single-<br>pass type IV<br>membrane protein.                                       |
| P50516 | VATA_MOUSE V-type<br>proton ATPase catalytic<br>subunit A OS=Mus musculus<br>GN=Atp6v1a PE=1 SV=2                  | 8.3E-09 | 30.2  | 6.2  | 3 (3 0 0 0<br>0)     | ND                                                                                                                       |
| Q60932 | VDAC1_MOUSE Voltage-<br>dependent anion-selective<br>channel protein 1 OS=Mus<br>musculus GN=Vdac1 PE=1<br>SV=3    | 5.6E-11 | 106.3 | 38.2 | 26 (18 8 0<br>0 0)   | Mitochondrion<br>outer membrane;<br>Multi-pass<br>membrane protein.<br>Cell membrane;<br>Multi-pass<br>membrane protein. |
| Q60930 | VDAC2_MOUSE Voltage-<br>dependent anion-selective<br>channel protein 2 OS=Mus<br>musculus GN=Vdac2 PE=1            | 5.8E-09 | 38.2  | 14.2 | 10 (8 2 0 0<br>0)    | Mitochondrion<br>outer membrane.                                                                                         |

|        |                                                                                                    |         |      |      |               |                                                   |
|--------|----------------------------------------------------------------------------------------------------|---------|------|------|---------------|---------------------------------------------------|
|        | SV=2                                                                                               |         |      |      |               |                                                   |
| Q60931 | VDAC3_MOUSE Voltage-dependent anion-selective channel protein 3 OS=Mus musculus GN=Vdac3 PE=1 SV=1 | 4.3E-09 | 30.2 | 15.5 | 5 (5 0 0 0 0) | Mitochondrion outer membrane.                     |
| P20152 | VIME_MOUSE Vimentin OS=Mus musculus GN=Vim PE=1 SV=3                                               | 9.8E-11 | 30.1 | 7.3  | 3 (3 0 0 0 0) | ND                                                |
| Q9EQH3 | VPS35_MOUSE Vacuolar protein sorting-associated protein 35 OS=Mus musculus GN=Vps35 PE=1 SV=1      | 1.3E-08 | 20.2 | 2.9  | 3 (3 0 0 0 0) | Cytoplasm. Membrane; Peripheral membrane protein. |
